# Supplementary material for: Nascent transcript analysis of glucocorticoid crosstalk with TNF defines primary and cooperative inflammatory repression
Source: HighWire-hosted journal article supplement (doi:10.1101/gr.248187.119), 2019-09-13
Supplement: Supplemental_File_S4.zip [file GR-356_Ctrl_10D_peaks.xls]

# This file is generated by MACS version 2.1.1.20160309
# Command line: callpeak -c /scratch/Shares/dowell/Sasse/Sasse2019/10minChIPseq/mapped/bams/GR-356_Ctrl_INPUT1.sorted.bam /scratch/Shares/dowell/Sasse/Sasse2019/10minChIPseq/mapped/bams/GR-356_Ctrl_INPUT1.sorted.bam -t /scratch/Shares/dowell/Sasse/Sasse2019/10minChIPseq/mapped/bams/GR-356_Ctrl_10D1.sorted.bam /scratch/Shares/dowell/Sasse/Sasse2019/10minChIPseq/mapped/bams/GR-356_Ctrl_10D2.sorted.bam --outdir /scratch/Shares/dowell/Sasse/Sasse2019/10minChIPseq/macs2 -n GR-356_Ctrl_10D -g hs --SPMR
# ARGUMENTS LIST:
# name = GR-356_Ctrl_10D
# format = AUTO
# ChIP-seq file = ['/scratch/Shares/dowell/Sasse/Sasse2019/10minChIPseq/mapped/bams/GR-356_Ctrl_10D1.sorted.bam', '/scratch/Shares/dowell/Sasse/Sasse2019/10minChIPseq/mapped/bams/GR-356_Ctrl_10D2.sorted.bam']
# control file = ['/scratch/Shares/dowell/Sasse/Sasse2019/10minChIPseq/mapped/bams/GR-356_Ctrl_INPUT1.sorted.bam', '/scratch/Shares/dowell/Sasse/Sasse2019/10minChIPseq/mapped/bams/GR-356_Ctrl_INPUT1.sorted.bam']
# effective genome size = 2.70e+09
# band width = 300
# model fold = [5, 50]
# qvalue cutoff = 5.00e-02
# Larger dataset will be scaled towards smaller dataset.
# Range for calculating regional lambda is: 1000 bps and 10000 bps
# Broad region calling is off
# Paired-End mode is off

# tag size is determined as 76 bps
# total tags in treatment: 16582002
# tags after filtering in treatment: 11556571
# maximum duplicate tags at the same position in treatment = 1
# Redundant rate in treatment: 0.30
# total tags in control: 38973416
# tags after filtering in control: 16001830
# maximum duplicate tags at the same position in control = 1
# Redundant rate in control: 0.59
# d = 203
# alternative fragment length(s) may be 203 bps
chr	start	end	length	abs_summit	pileup	-log10(pvalue)	fold_enrichment	-log10(qvalue)	name
chr1	1264875	1265170	296	1265013	20.00	11.22712	5.40011	7.44680	GR-356_Ctrl_10D_peak_1
chr1	1741217	1741462	246	1741274	15.00	8.83037	5.05272	5.18296	GR-356_Ctrl_10D_peak_2
chr1	2255306	2256304	999	2255723	44.00	47.42304	17.22370	42.62575	GR-356_Ctrl_10D_peak_3
chr1	3543392	3543594	203	3543511	16.00	9.72846	5.36852	6.02673	GR-356_Ctrl_10D_peak_4
chr1	3548201	3548430	230	3548366	9.00	6.32821	4.60223	2.89837	GR-356_Ctrl_10D_peak_5
chr1	6385702	6385993	292	6385875	16.00	11.68258	6.50673	7.87434	GR-356_Ctrl_10D_peak_6
chr1	7117964	7118281	318	7118107	14.00	7.95815	4.73693	4.37816	GR-356_Ctrl_10D_peak_7
chr1	8004789	8005579	791	8005085	84.00	102.78660	27.84602	97.18628	GR-356_Ctrl_10D_peak_8
chr1	8070984	8071277	294	8071155	30.00	33.99772	15.29919	29.47650	GR-356_Ctrl_10D_peak_9
chr1	8121307	8121509	203	8121407	14.00	10.30761	6.13646	6.57570	GR-356_Ctrl_10D_peak_10
chr1	8134011	8134252	242	8134152	15.00	10.65720	6.12398	6.90103	GR-356_Ctrl_10D_peak_11
chr1	8137733	8138264	532	8137918	53.00	53.81934	16.87970	48.91741	GR-356_Ctrl_10D_peak_12
chr1	8182250	8182746	497	8182589	23.00	17.86373	8.25908	13.80007	GR-356_Ctrl_10D_peak_13
chr1	8189986	8190225	240	8190149	14.00	12.72425	7.62347	8.86847	GR-356_Ctrl_10D_peak_14
chr1	8197808	8198236	429	8197966	29.00	23.25980	9.47386	19.00767	GR-356_Ctrl_10D_peak_15
chr1	8202594	8202933	340	8202791	18.00	15.34104	8.19154	11.37763	GR-356_Ctrl_10D_peak_16
chr1	8211817	8212501	685	8212106	30.00	24.41639	9.78965	20.12776	GR-356_Ctrl_10D_peak_17
chr1	8259068	8259470	403	8259321	22.00	19.34005	9.40924	15.22368	GR-356_Ctrl_10D_peak_18
chr1	8343459	8343814	356	8343615	37.00	31.63990	11.35781	27.17003	GR-356_Ctrl_10D_peak_19
chr1	8394975	8395346	372	8395124	37.00	28.43243	9.77162	24.03705	GR-356_Ctrl_10D_peak_20
chr1	8396853	8397384	532	8397134	86.00	133.42149	43.88911	127.48521	GR-356_Ctrl_10D_peak_21
chr1	9377042	9377244	203	9377189	12.00	10.93743	6.95603	7.17142	GR-356_Ctrl_10D_peak_22
chr1	9700167	9700540	374	9700369	29.00	23.25980	9.47386	19.00767	GR-356_Ctrl_10D_peak_23
chr1	9766861	9767119	259	9766979	14.00	10.84639	6.46701	7.08551	GR-356_Ctrl_10D_peak_24
chr1	11158869	11159344	476	11159173	29.00	33.25914	15.24694	28.75491	GR-356_Ctrl_10D_peak_25
chr1	12434278	12434489	212	12434417	10.00	7.64223	5.27605	4.09078	GR-356_Ctrl_10D_peak_26
chr1	12604428	12604678	251	12604539	24.00	17.69942	7.89488	13.64293	GR-356_Ctrl_10D_peak_27
chr1	15345750	15346071	322	15345908	19.00	19.72595	10.55797	15.60206	GR-356_Ctrl_10D_peak_28
chr1	15356173	15356559	387	15356329	48.00	47.25257	15.47396	42.45883	GR-356_Ctrl_10D_peak_29
chr1	15796796	15797190	395	15796994	16.00	10.56882	5.85018	6.82410	GR-356_Ctrl_10D_peak_30
chr1	15799113	15799334	222	15799184	14.00	9.65783	5.74123	5.96542	GR-356_Ctrl_10D_peak_31
chr1	15799458	15799754	297	15799622	27.00	24.34837	10.71697	20.06435	GR-356_Ctrl_10D_peak_32
chr1	15800515	15800795	281	15800637	21.00	12.11161	5.65725	8.28673	GR-356_Ctrl_10D_peak_33
chr1	16016005	16016352	348	16016179	36.00	37.84072	15.13660	33.23230	GR-356_Ctrl_10D_peak_34
chr1	16173591	16173913	323	16173783	26.00	24.16418	10.94859	19.89068	GR-356_Ctrl_10D_peak_35
chr1	16250485	16250932	448	16250683	48.00	47.25257	15.47396	42.45883	GR-356_Ctrl_10D_peak_36
chr1	16375616	16375919	304	16375777	17.00	14.18108	7.76041	10.26550	GR-356_Ctrl_10D_peak_37
chr1	16514003	16514320	318	16514136	25.00	12.72083	5.24363	8.86547	GR-356_Ctrl_10D_peak_38
chr1	16666393	16666597	205	16666470	16.00	9.21498	5.08113	5.55103	GR-356_Ctrl_10D_peak_39
chr1	16666697	16667117	421	16666842	31.00	21.89208	8.22873	17.68758	GR-356_Ctrl_10D_peak_40
chr1	16740547	16740990	444	16740628	21.00	8.83310	4.12509	5.18506	GR-356_Ctrl_10D_peak_41
chr1	16781005	16781438	434	16781285	16.00	9.72846	5.36852	6.02673	GR-356_Ctrl_10D_peak_42
chr1	16895905	16896176	272	16896018	24.00	15.75474	6.87015	11.77623	GR-356_Ctrl_10D_peak_43
chr1	17012939	17013274	336	17013160	17.00	13.52504	7.36375	9.63421	GR-356_Ctrl_10D_peak_44
chr1	17233829	17234042	214	17233896	12.00	8.29870	5.31827	4.69290	GR-356_Ctrl_10D_peak_45
chr1	17624983	17625267	285	17625126	19.00	19.96593	10.70158	15.82610	GR-356_Ctrl_10D_peak_46
chr1	19449120	19449407	288	19449285	10.00	5.59859	3.98654	2.22578	GR-356_Ctrl_10D_peak_47
chr1	20494867	20495448	582	20495086	31.00	35.49205	15.79272	30.93313	GR-356_Ctrl_10D_peak_48
chr1	20496066	20496559	494	20496229	24.00	17.69942	7.89488	13.64293	GR-356_Ctrl_10D_peak_49
chr1	21862107	21862435	329	21862265	19.00	10.36255	5.14296	6.62581	GR-356_Ctrl_10D_peak_50
chr1	21931156	21931368	213	21931307	13.00	7.11342	4.42113	3.60941	GR-356_Ctrl_10D_peak_51
chr1	23010749	23011044	296	23010932	22.00	22.58042	11.35101	18.35768	GR-356_Ctrl_10D_peak_52
chr1	23100264	23100619	356	23100432	36.00	32.45156	12.12121	27.96249	GR-356_Ctrl_10D_peak_53
chr1	23456337	23456539	203	23456510	12.00	10.93743	6.95603	7.17142	GR-356_Ctrl_10D_peak_54
chr1	23477367	23477725	359	23477524	30.00	30.73746	13.36515	26.28953	GR-356_Ctrl_10D_peak_55
chr1	23984585	23984977	393	23984726	32.00	26.77034	10.42124	22.42191	GR-356_Ctrl_10D_peak_56
chr1	24294340	24294666	327	24294480	14.00	12.10918	7.24556	8.28673	GR-356_Ctrl_10D_peak_57
chr1	24416997	24417279	283	24417082	15.00	8.83037	5.05272	5.18296	GR-356_Ctrl_10D_peak_58
chr1	24417682	24417884	203	24417766	15.00	11.32376	6.52685	7.53931	GR-356_Ctrl_10D_peak_59
chr1	24683776	24683978	203	24683864	20.00	13.55309	6.63170	9.65682	GR-356_Ctrl_10D_peak_60
chr1	24793842	24794168	327	24793997	27.00	22.43964	9.63559	18.21939	GR-356_Ctrl_10D_peak_61
chr1	26036459	26036781	323	26036644	23.00	23.95014	11.84454	19.68563	GR-356_Ctrl_10D_peak_62
chr1	26620924	26621229	306	26621089	23.00	18.63708	8.69790	14.54769	GR-356_Ctrl_10D_peak_63
chr1	26705853	26706063	211	26705963	14.00	5.21124	3.25308	1.90626	GR-356_Ctrl_10D_peak_64
chr1	26961810	26962143	334	26962008	20.00	16.01727	8.03773	12.02110	GR-356_Ctrl_10D_peak_65
chr1	26999421	26999788	368	26999623	60.00	74.19633	24.73569	68.97134	GR-356_Ctrl_10D_peak_66
chr1	27145918	27146146	229	27146087	20.00	11.22712	5.40011	7.44680	GR-356_Ctrl_10D_peak_67
chr1	27299114	27299331	218	27299281	17.00	11.54664	6.19431	7.75095	GR-356_Ctrl_10D_peak_68
chr1	27299494	27299715	222	27299634	19.00	11.48192	5.72685	7.69008	GR-356_Ctrl_10D_peak_69
chr1	27366950	27367252	303	27367085	18.00	18.50580	10.10830	14.42476	GR-356_Ctrl_10D_peak_70
chr1	27538873	27539082	210	27538956	18.00	6.76303	3.56258	3.28705	GR-356_Ctrl_10D_peak_71
chr1	27540335	27540621	287	27540472	33.00	15.00199	5.01651	11.04834	GR-356_Ctrl_10D_peak_72
chr1	27801208	27801410	203	27801349	9.00	7.46279	5.32016	3.92089	GR-356_Ctrl_10D_peak_73
chr1	28594541	28594831	291	28594680	11.00	8.62515	5.71550	5.00334	GR-356_Ctrl_10D_peak_74
chr1	30788646	30788909	264	30788812	18.00	18.37545	10.03007	14.29616	GR-356_Ctrl_10D_peak_75
chr1	30823975	30824177	203	30824049	13.00	8.21603	5.07378	4.62604	GR-356_Ctrl_10D_peak_76
chr1	31102643	31102873	231	31102816	14.00	11.55428	6.90335	7.75638	GR-356_Ctrl_10D_peak_77
chr1	32262893	32263187	295	32263019	13.00	9.28838	5.72736	5.61672	GR-356_Ctrl_10D_peak_78
chr1	33338860	33339097	238	33338983	18.00	15.42720	8.24365	11.46192	GR-356_Ctrl_10D_peak_79
chr1	36200060	36200262	203	36200252	15.00	7.12379	4.11437	3.61532	GR-356_Ctrl_10D_peak_80
chr1	36351512	36351762	251	36351594	15.00	9.16004	5.24160	5.50222	GR-356_Ctrl_10D_peak_81
chr1	36436757	36437106	350	36436930	28.00	24.56963	10.50996	20.27740	GR-356_Ctrl_10D_peak_82
chr1	37499143	37499486	344	37499331	25.00	26.74192	12.83158	22.39920	GR-356_Ctrl_10D_peak_83
chr1	37534423	37534710	288	37534577	14.00	10.21939	6.08255	6.49609	GR-356_Ctrl_10D_peak_84
chr1	38451453	38451697	245	38451601	14.00	13.30945	7.98024	9.43483	GR-356_Ctrl_10D_peak_85
chr1	40866468	40866738	271	40866588	21.00	8.83310	4.12509	5.18506	GR-356_Ctrl_10D_peak_86
chr1	40875808	40876119	312	40875960	16.00	13.51786	7.61819	9.63232	GR-356_Ctrl_10D_peak_87
chr1	41109255	41109854	600	41109400	26.00	19.87698	8.52647	15.74164	GR-356_Ctrl_10D_peak_88
chr1	41496237	41496616	380	41496437	54.00	62.37623	21.05119	57.32693	GR-356_Ctrl_10D_peak_89
chr1	41498895	41499235	341	41499057	18.00	11.48719	5.93916	7.69397	GR-356_Ctrl_10D_peak_90
chr1	41902095	41902577	483	41902192	14.00	9.65783	5.74123	5.96542	GR-356_Ctrl_10D_peak_91
chr1	41955444	41955667	224	41955595	17.00	10.10331	5.38001	6.38706	GR-356_Ctrl_10D_peak_92
chr1	43206838	43207533	696	43207021	20.00	11.22712	5.40011	7.44680	GR-356_Ctrl_10D_peak_93
chr1	43241400	43241757	358	43241539	24.00	25.33754	12.33806	21.03123	GR-356_Ctrl_10D_peak_94
chr1	43472610	43472921	312	43472724	19.00	10.36255	5.14296	6.62581	GR-356_Ctrl_10D_peak_95
chr1	43475989	43476289	301	43476122	28.00	24.56963	10.50996	20.27740	GR-356_Ctrl_10D_peak_96
chr1	43801210	43801582	373	43801394	16.00	12.42749	6.95465	8.58616	GR-356_Ctrl_10D_peak_97
chr1	44807184	44807414	231	44807299	14.00	6.37500	3.85722	2.93436	GR-356_Ctrl_10D_peak_98
chr1	46084527	46084833	307	46084661	33.00	33.64975	13.90931	29.13270	GR-356_Ctrl_10D_peak_99
chr1	46806763	46806985	223	46806850	12.00	10.93743	6.95603	7.17142	GR-356_Ctrl_10D_peak_100
chr1	48047157	48047457	301	48047311	23.00	16.63569	7.57908	12.62046	GR-356_Ctrl_10D_peak_101
chr1	48049902	48050136	235	48050071	12.00	10.93743	6.95603	7.17142	GR-356_Ctrl_10D_peak_102
chr1	51558520	51558722	203	51558566	13.00	4.58475	3.03621	1.36327	GR-356_Ctrl_10D_peak_103
chr1	55429074	55429745	672	55429276	44.00	36.57191	11.57166	31.99191	GR-356_Ctrl_10D_peak_104
chr1	55580763	55581194	432	55581006	59.00	70.15603	22.96493	64.98556	GR-356_Ctrl_10D_peak_105
chr1	55632137	55632375	239	55632296	24.00	17.69942	7.89488	13.64293	GR-356_Ctrl_10D_peak_106
chr1	55718805	55719290	486	55718987	40.00	33.36382	11.26705	28.85921	GR-356_Ctrl_10D_peak_107
chr1	56301794	56302014	221	56301983	13.00	9.20658	5.67704	5.54393	GR-356_Ctrl_10D_peak_108
chr1	58848745	58849138	394	58848895	14.00	6.37500	3.85722	2.93436	GR-356_Ctrl_10D_peak_109
chr1	58929920	58930260	341	58930144	11.00	9.02464	5.96543	5.37212	GR-356_Ctrl_10D_peak_110
chr1	58932804	58933092	289	58932849	9.00	6.63238	4.79641	3.16078	GR-356_Ctrl_10D_peak_111
chr1	59151070	59151380	311	59151231	17.00	11.54664	6.19431	7.75095	GR-356_Ctrl_10D_peak_112
chr1	59750758	59751026	269	59750870	17.00	16.02543	8.88340	12.02762	GR-356_Ctrl_10D_peak_113
chr1	61182140	61182416	277	61182267	19.00	17.48569	9.20447	13.43903	GR-356_Ctrl_10D_peak_114
chr1	61496427	61496791	365	61496617	37.00	25.05477	8.24113	20.75679	GR-356_Ctrl_10D_peak_115
chr1	63920490	63920959	470	63920710	26.00	19.87698	8.52647	15.74164	GR-356_Ctrl_10D_peak_116
chr1	64031285	64031525	241	64031422	16.00	15.51595	8.83748	11.54920	GR-356_Ctrl_10D_peak_117
chr1	64039552	64040052	501	64039765	33.00	34.93301	14.65855	30.39074	GR-356_Ctrl_10D_peak_118
chr1	64042520	64043057	538	64042857	78.00	91.35400	24.94782	85.89821	GR-356_Ctrl_10D_peak_119
chr1	64133033	64133349	317	64133173	28.00	21.94347	9.06503	17.73740	GR-356_Ctrl_10D_peak_120
chr1	64222998	64223201	204	64223135	13.00	10.44517	6.44313	6.70492	GR-356_Ctrl_10D_peak_121
chr1	64898157	64898540	384	64898318	47.00	41.98743	13.19069	37.29473	GR-356_Ctrl_10D_peak_122
chr1	64917382	64917777	396	64917593	23.00	13.93699	6.17155	10.02573	GR-356_Ctrl_10D_peak_123
chr1	65247851	65248079	229	65247953	18.00	9.51884	4.88581	5.83557	GR-356_Ctrl_10D_peak_124
chr1	65425745	65426031	287	65425905	23.00	11.91056	5.20493	8.09781	GR-356_Ctrl_10D_peak_125
chr1	65820984	65821286	303	65821122	39.00	41.88634	16.22013	37.19566	GR-356_Ctrl_10D_peak_126
chr1	65948880	65949082	203	65948957	16.00	7.89826	4.37151	4.32601	GR-356_Ctrl_10D_peak_127
chr1	67570518	67570787	270	67570662	20.00	16.95276	8.59104	12.92164	GR-356_Ctrl_10D_peak_128
chr1	67726337	67726539	203	67726416	14.00	11.55428	6.90335	7.75638	GR-356_Ctrl_10D_peak_129
chr1	67736114	67736819	706	67736559	21.00	14.56176	6.94749	10.62918	GR-356_Ctrl_10D_peak_130
chr1	67749825	67750267	443	67750072	23.00	20.41550	9.73208	16.26382	GR-356_Ctrl_10D_peak_131
chr1	67880239	67880647	409	67880432	37.00	39.26125	15.54570	34.62147	GR-356_Ctrl_10D_peak_132
chr1	67952239	67952493	255	67952324	12.00	8.29870	5.31827	4.69290	GR-356_Ctrl_10D_peak_133
chr1	67953332	67953587	256	67953476	17.00	13.52504	7.36375	9.63421	GR-356_Ctrl_10D_peak_134
chr1	68384466	68384724	259	68384611	17.00	10.10331	5.38001	6.38706	GR-356_Ctrl_10D_peak_135
chr1	68384976	68385226	251	68385115	18.00	11.99634	6.22440	8.17827	GR-356_Ctrl_10D_peak_136
chr1	77039772	77040320	549	77039940	21.00	19.79029	9.99010	15.66491	GR-356_Ctrl_10D_peak_137
chr1	77832915	77833376	462	77833177	15.00	13.46672	7.83964	9.58161	GR-356_Ctrl_10D_peak_138
chr1	77874899	77875244	346	77875067	19.00	15.66840	8.11006	11.69225	GR-356_Ctrl_10D_peak_139
chr1	78095732	78096077	346	78095876	27.00	20.98960	8.84227	16.81438	GR-356_Ctrl_10D_peak_140
chr1	78101459	78102446	988	78102302	31.00	27.25895	11.01210	22.89597	GR-356_Ctrl_10D_peak_141
chr1	78370811	78371203	393	78371030	41.00	41.58947	15.22133	36.90856	GR-356_Ctrl_10D_peak_142
chr1	81174897	81175392	496	81175268	12.00	8.29870	5.31827	4.69290	GR-356_Ctrl_10D_peak_143
chr1	84146439	84146681	243	84146551	15.00	11.35453	6.54556	7.56438	GR-356_Ctrl_10D_peak_144
chr1	84253899	84254396	498	84254227	21.00	14.56176	6.94749	10.62918	GR-356_Ctrl_10D_peak_145
chr1	84365674	84366113	440	84365679	16.00	5.48972	3.18757	2.14440	GR-356_Ctrl_10D_peak_146
chr1	85298274	85298711	438	85298533	35.00	27.51314	9.89302	23.14478	GR-356_Ctrl_10D_peak_147
chr1	85313797	85314316	520	85314044	51.00	65.08337	24.09419	59.98915	GR-356_Ctrl_10D_peak_148
chr1	85320406	85320743	338	85320618	19.00	13.57074	6.88256	9.67154	GR-356_Ctrl_10D_peak_149
chr1	85329046	85329330	285	85329192	24.00	17.69942	7.89488	13.64293	GR-356_Ctrl_10D_peak_150
chr1	85330288	85330600	313	85330457	27.00	24.34837	10.71697	20.06435	GR-356_Ctrl_10D_peak_151
chr1	85448550	85448772	223	85448683	17.00	10.65101	5.68431	6.89792	GR-356_Ctrl_10D_peak_152
chr1	85606987	85607630	644	85607410	71.00	80.53864	22.73725	75.22527	GR-356_Ctrl_10D_peak_153
chr1	85611741	85612190	450	85611911	24.00	18.23935	8.19001	14.16380	GR-356_Ctrl_10D_peak_154
chr1	85612795	85613014	220	85612882	14.00	7.87427	4.68881	4.30879	GR-356_Ctrl_10D_peak_155
chr1	86788762	86789048	287	86788883	16.00	10.56882	5.85018	6.82410	GR-356_Ctrl_10D_peak_156
chr1	89605699	89606110	412	89605922	38.00	34.13094	12.31601	29.60455	GR-356_Ctrl_10D_peak_157
chr1	89866098	89866344	247	89866228	15.00	8.83037	5.05272	5.18296	GR-356_Ctrl_10D_peak_158
chr1	89890204	89890505	302	89890336	35.00	20.47335	6.75015	16.32022	GR-356_Ctrl_10D_peak_159
chr1	89894262	89894541	280	89894376	24.00	18.23935	8.19001	14.16380	GR-356_Ctrl_10D_peak_160
chr1	89906797	89907029	233	89906978	15.00	11.19670	6.44971	7.42110	GR-356_Ctrl_10D_peak_161
chr1	91557017	91557401	385	91557199	31.00	25.58671	10.10545	21.27127	GR-356_Ctrl_10D_peak_162
chr1	91608892	91609367	476	91609075	28.00	26.92145	11.86382	22.56609	GR-356_Ctrl_10D_peak_163
chr1	91650773	91651097	325	91650921	15.00	5.86474	3.46995	2.47256	GR-356_Ctrl_10D_peak_164
chr1	93665356	93665623	268	93665489	16.00	13.04442	7.32928	9.17460	GR-356_Ctrl_10D_peak_165
chr1	93701700	93702280	581	93701964	59.00	75.25983	25.86803	70.01762	GR-356_Ctrl_10D_peak_166
chr1	93738193	93738849	657	93738537	23.00	20.56168	9.81834	16.40304	GR-356_Ctrl_10D_peak_167
chr1	93779528	93780170	643	93779879	52.00	41.61479	11.49422	36.93113	GR-356_Ctrl_10D_peak_168
chr1	94325633	94326151	519	94325964	17.00	12.11235	6.52342	8.28673	GR-356_Ctrl_10D_peak_169
chr1	94544132	94544493	362	94544308	35.00	36.20811	14.59811	31.63820	GR-356_Ctrl_10D_peak_170
chr1	94544918	94545422	505	94545255	26.00	25.21491	11.56750	20.91284	GR-356_Ctrl_10D_peak_171
chr1	94622794	94622997	204	94622875	9.00	5.11682	3.82749	1.81866	GR-356_Ctrl_10D_peak_172
chr1	94646081	94646557	477	94646323	27.00	13.46549	5.25011	9.58075	GR-356_Ctrl_10D_peak_173
chr1	94739605	94740056	452	94739812	49.00	56.79936	20.27516	51.85056	GR-356_Ctrl_10D_peak_174
chr1	94744033	94744270	238	94744154	14.00	10.30761	6.13646	6.57570	GR-356_Ctrl_10D_peak_175
chr1	94971392	94971758	367	94971566	35.00	30.39722	11.36863	25.95806	GR-356_Ctrl_10D_peak_176
chr1	94974938	94975240	303	94975104	23.00	16.63569	7.57908	12.62046	GR-356_Ctrl_10D_peak_177
chr1	96362661	96362941	281	96362787	26.00	14.48959	5.85554	10.56558	GR-356_Ctrl_10D_peak_178
chr1	96370854	96371090	237	96370932	18.00	14.64586	7.77285	10.70526	GR-356_Ctrl_10D_peak_179
chr1	96416167	96416404	238	96416270	20.00	16.01727	8.03773	12.02110	GR-356_Ctrl_10D_peak_180
chr1	96538432	96538655	224	96538514	14.00	13.38527	8.02619	9.50636	GR-356_Ctrl_10D_peak_181
chr1	97144459	97144830	372	97144743	17.00	10.65101	5.68431	6.89792	GR-356_Ctrl_10D_peak_182
chr1	98086780	98087019	240	98086924	17.00	10.65101	5.68431	6.89792	GR-356_Ctrl_10D_peak_183
chr1	98316439	98316800	362	98316637	30.00	33.63078	15.08096	29.11699	GR-356_Ctrl_10D_peak_184
chr1	100597101	100597507	407	100597267	15.00	11.35453	6.54556	7.56438	GR-356_Ctrl_10D_peak_185
chr1	100622066	100622268	203	100622117	10.00	7.30453	5.06246	3.78107	GR-356_Ctrl_10D_peak_186
chr1	100631182	100631640	459	100631461	56.00	46.36322	12.36170	41.58686	GR-356_Ctrl_10D_peak_187
chr1	100862647	100862849	203	100862749	10.00	7.41390	5.13171	3.87484	GR-356_Ctrl_10D_peak_188
chr1	102897611	102897850	240	102897764	16.00	9.72846	5.36852	6.02673	GR-356_Ctrl_10D_peak_189
chr1	108010004	108010246	243	108010069	11.00	7.34068	4.90917	3.80450	GR-356_Ctrl_10D_peak_190
chr1	108828570	108828852	283	108828722	23.00	17.86373	8.25908	13.80007	GR-356_Ctrl_10D_peak_191
chr1	109370602	109371075	474	109370800	50.00	49.98831	16.10555	45.14877	GR-356_Ctrl_10D_peak_192
chr1	109829279	109829495	217	109829342	11.00	7.76250	5.17361	4.20185	GR-356_Ctrl_10D_peak_193
chr1	109928000	109928311	312	109928125	26.00	28.16264	13.32510	23.77859	GR-356_Ctrl_10D_peak_194
chr1	111743698	111744018	321	111743839	20.00	9.48921	4.55431	5.80980	GR-356_Ctrl_10D_peak_195
chr1	111778545	111778775	231	111778630	9.00	5.87397	4.31134	2.47776	GR-356_Ctrl_10D_peak_196
chr1	113459362	113459640	279	113459483	18.00	16.35040	8.80365	12.34586	GR-356_Ctrl_10D_peak_197
chr1	114320760	114320980	221	114320804	11.00	7.34068	4.90917	3.80450	GR-356_Ctrl_10D_peak_198
chr1	115168740	115169004	265	115168836	16.00	7.89826	4.37151	4.32601	GR-356_Ctrl_10D_peak_199
chr1	115179412	115179922	511	115179709	34.00	34.81747	14.19261	30.27781	GR-356_Ctrl_10D_peak_200
chr1	115430910	115431128	219	115431011	14.00	11.78544	7.04597	7.97621	GR-356_Ctrl_10D_peak_201
chr1	116376493	116376703	211	116376615	16.00	9.72846	5.36852	6.02673	GR-356_Ctrl_10D_peak_202
chr1	118947841	118948165	325	118947999	16.00	9.72846	5.36852	6.02673	GR-356_Ctrl_10D_peak_203
chr1	119101636	119101929	294	119101799	22.00	24.17774	12.30682	19.90195	GR-356_Ctrl_10D_peak_204
chr1	120032269	120032471	203	120032356	13.00	9.20658	5.67704	5.54393	GR-356_Ctrl_10D_peak_205
chr1	120257157	120257553	397	120257462	9.00	5.52982	4.09097	2.16270	GR-356_Ctrl_10D_peak_206
chr1	120289295	120289707	413	120289478	31.00	30.91800	13.09111	26.46207	GR-356_Ctrl_10D_peak_207
chr1	120529513	120529812	300	120529723	16.00	6.54374	3.68682	3.07554	GR-356_Ctrl_10D_peak_208
chr1	120608729	120609023	295	120608872	24.00	25.33754	12.33806	21.03123	GR-356_Ctrl_10D_peak_209
chr1	120640960	120641232	273	120641160	12.00	10.53143	6.70696	6.79009	GR-356_Ctrl_10D_peak_210
chr1	120973019	120973255	237	120973064	12.00	8.29870	5.31827	4.69290	GR-356_Ctrl_10D_peak_211
chr1	121203137	121203339	203	121203268	14.00	7.95815	4.73693	4.37816	GR-356_Ctrl_10D_peak_212
chr1	121262243	121262465	223	121262363	17.00	10.54790	5.62657	6.80508	GR-356_Ctrl_10D_peak_213
chr1	121284494	121284707	214	121284584	19.00	12.56442	6.31590	8.71315	GR-356_Ctrl_10D_peak_214
chr1	125180109	125180448	340	125180264	375.00	7.52006	1.33706	3.97068	GR-356_Ctrl_10D_peak_215
chr1	143729203	143729572	370	143729452	18.00	13.80571	7.27223	9.90112	GR-356_Ctrl_10D_peak_216
chr1	144917156	144917358	203	144917211	12.00	8.29870	5.31827	4.69290	GR-356_Ctrl_10D_peak_217
chr1	145892066	145892440	375	145892241	63.00	54.95857	13.87981	50.03928	GR-356_Ctrl_10D_peak_218
chr1	145997262	145997537	276	145997375	21.00	18.13681	9.00014	14.06386	GR-356_Ctrl_10D_peak_219
chr1	146052025	146052292	268	146052167	13.00	10.73339	6.62184	6.97620	GR-356_Ctrl_10D_peak_220
chr1	146191592	146191855	264	146191722	12.00	8.29870	5.31827	4.69290	GR-356_Ctrl_10D_peak_221
chr1	146246546	146246751	206	146246655	12.00	9.56385	6.10651	5.87911	GR-356_Ctrl_10D_peak_222
chr1	146307600	146307802	203	146307659	13.00	9.78813	6.03587	6.07882	GR-356_Ctrl_10D_peak_223
chr1	146376778	146377081	304	146376916	18.00	14.64586	7.77285	10.70526	GR-356_Ctrl_10D_peak_224
chr1	146409825	146410068	244	146409989	14.00	9.15029	5.43619	5.49398	GR-356_Ctrl_10D_peak_225
chr1	148038710	148038964	255	148038832	17.00	6.11501	3.37507	2.70472	GR-356_Ctrl_10D_peak_226
chr1	148424212	148424588	377	148424364	24.00	25.64004	12.51922	21.31616	GR-356_Ctrl_10D_peak_227
chr1	148522640	148522903	264	148522739	13.00	10.96052	6.76252	7.19399	GR-356_Ctrl_10D_peak_228
chr1	148642319	148642567	249	148642459	14.00	10.30761	6.13646	6.57570	GR-356_Ctrl_10D_peak_229
chr1	148791437	148791747	311	148791610	17.00	10.65101	5.68431	6.89792	GR-356_Ctrl_10D_peak_230
chr1	148901226	148901547	322	148901397	32.00	26.77034	10.42124	22.42191	GR-356_Ctrl_10D_peak_231
chr1	148992423	148992680	258	148992597	12.00	6.91785	4.47367	3.42709	GR-356_Ctrl_10D_peak_232
chr1	149228724	149229082	359	149228889	34.00	38.08564	16.10782	33.47093	GR-356_Ctrl_10D_peak_233
chr1	149260911	149261148	238	149261040	12.00	4.96098	3.34292	1.67862	GR-356_Ctrl_10D_peak_234
chr1	149338472	149338875	404	149338617	18.00	13.08549	6.84944	9.21562	GR-356_Ctrl_10D_peak_235
chr1	149428392	149428693	302	149428563	19.00	18.58504	9.87045	14.50188	GR-356_Ctrl_10D_peak_236
chr1	149832544	149832880	337	149832633	12.00	6.29799	4.10534	2.87237	GR-356_Ctrl_10D_peak_237
chr1	150561300	150561595	296	150561432	21.00	18.94946	9.48495	14.84561	GR-356_Ctrl_10D_peak_238
chr1	150568096	150568478	383	150568280	57.00	52.88226	14.91458	47.99069	GR-356_Ctrl_10D_peak_239
chr1	150604796	150605140	345	150604973	18.00	15.34104	8.19154	11.37763	GR-356_Ctrl_10D_peak_240
chr1	151553678	151553880	203	151553845	8.00	5.71064	4.34734	2.32928	GR-356_Ctrl_10D_peak_241
chr1	151988523	151988907	385	151988803	14.00	5.21124	3.25308	1.90626	GR-356_Ctrl_10D_peak_242
chr1	151992440	151992715	276	151992571	23.00	19.84475	9.39689	15.71583	GR-356_Ctrl_10D_peak_243
chr1	152182779	152183065	287	152182935	29.00	26.87443	11.48246	22.52304	GR-356_Ctrl_10D_peak_244
chr1	152328610	152328986	377	152328710	14.00	7.95815	4.73693	4.37816	GR-356_Ctrl_10D_peak_245
chr1	154418210	154418586	377	154418385	20.00	16.95276	8.59104	12.92164	GR-356_Ctrl_10D_peak_246
chr1	155017285	155017709	425	155017444	56.00	68.12180	23.31855	62.98133	GR-356_Ctrl_10D_peak_247
chr1	156262989	156263224	236	156263128	10.00	6.41677	4.50007	2.96268	GR-356_Ctrl_10D_peak_248
chr1	156616494	156616821	328	156616626	39.00	47.41924	19.45930	42.62381	GR-356_Ctrl_10D_peak_249
chr1	156639702	156640112	411	156639873	33.00	21.03188	7.37365	16.85503	GR-356_Ctrl_10D_peak_250
chr1	157284112	157284607	496	157284465	12.00	10.93743	6.95603	7.17142	GR-356_Ctrl_10D_peak_251
chr1	157419846	157420413	568	157420047	17.00	17.26211	9.63142	13.22009	GR-356_Ctrl_10D_peak_252
chr1	159598182	159598650	469	159598456	48.00	53.30040	18.75469	48.40635	GR-356_Ctrl_10D_peak_253
chr1	159613837	159614062	226	159613962	12.00	10.93743	6.95603	7.17142	GR-356_Ctrl_10D_peak_254
chr1	159779443	159779985	543	159779714	57.00	52.88226	14.91458	47.99069	GR-356_Ctrl_10D_peak_255
chr1	159805006	159805303	298	159805167	18.00	14.64586	7.77285	10.70526	GR-356_Ctrl_10D_peak_256
chr1	160124774	160125007	234	160124946	16.00	10.08143	5.56920	6.36625	GR-356_Ctrl_10D_peak_257
chr1	161382588	161382822	235	161382687	14.00	7.95815	4.73693	4.37816	GR-356_Ctrl_10D_peak_258
chr1	162388558	162388814	257	162388665	15.00	11.35453	6.54556	7.56438	GR-356_Ctrl_10D_peak_259
chr1	162605642	162605870	229	162605726	13.00	10.44517	6.44313	6.70492	GR-356_Ctrl_10D_peak_260
chr1	162873724	162874331	608	162873805	21.00	18.00353	8.92107	13.93598	GR-356_Ctrl_10D_peak_261
chr1	163035693	163035996	304	163035842	18.00	14.53192	7.70456	10.60465	GR-356_Ctrl_10D_peak_262
chr1	163168195	163168448	254	163168310	13.00	11.70727	7.22288	7.89865	GR-356_Ctrl_10D_peak_263
chr1	164748432	164748831	400	164748773	13.00	11.19792	6.90931	7.42110	GR-356_Ctrl_10D_peak_264
chr1	164780918	164781282	365	164781082	35.00	42.49408	18.29633	37.79471	GR-356_Ctrl_10D_peak_265
chr1	165116855	165117119	265	165117022	12.00	8.29870	5.31827	4.69290	GR-356_Ctrl_10D_peak_266
chr1	167095442	167095651	210	167095598	15.00	11.25988	6.48805	7.47609	GR-356_Ctrl_10D_peak_267
chr1	167136209	167136651	443	167136456	37.00	45.19100	19.02922	40.43560	GR-356_Ctrl_10D_peak_268
chr1	167797042	167797383	342	167797197	14.00	10.30761	6.13646	6.57570	GR-356_Ctrl_10D_peak_269
chr1	168301768	168302045	278	168301931	20.00	13.55309	6.63170	9.65682	GR-356_Ctrl_10D_peak_270
chr1	168483555	168483798	244	168483694	9.00	7.26814	5.19852	3.75222	GR-356_Ctrl_10D_peak_271
chr1	168709142	168709414	273	168709212	12.00	8.22331	5.27154	4.62849	GR-356_Ctrl_10D_peak_272
chr1	169485698	169486422	725	169485877	74.00	76.07843	19.28609	70.82275	GR-356_Ctrl_10D_peak_273
chr1	171794104	171794334	231	171794245	23.00	16.49401	7.50209	12.48632	GR-356_Ctrl_10D_peak_274
chr1	172356715	172356969	255	172356841	19.00	11.94822	5.97779	8.13198	GR-356_Ctrl_10D_peak_275
chr1	172638863	172639172	310	172638996	20.00	18.01724	9.22881	13.94936	GR-356_Ctrl_10D_peak_276
chr1	172746227	172746776	550	172746494	87.00	107.66860	28.82882	102.01227	GR-356_Ctrl_10D_peak_277
chr1	172897817	172898019	203	172897907	12.00	8.99264	5.75012	5.34066	GR-356_Ctrl_10D_peak_278
chr1	172918012	172918361	350	172918159	31.00	19.09414	6.93990	14.98627	GR-356_Ctrl_10D_peak_279
chr1	172929135	172929337	203	172929170	13.00	10.44517	6.44313	6.70492	GR-356_Ctrl_10D_peak_280
chr1	173590621	173590841	221	173590689	13.00	10.44517	6.44313	6.70492	GR-356_Ctrl_10D_peak_281
chr1	178238725	178239127	403	178238953	20.00	13.55309	6.63170	9.65682	GR-356_Ctrl_10D_peak_282
chr1	180560839	180561063	225	180560958	10.00	8.61749	5.88587	4.99608	GR-356_Ctrl_10D_peak_283
chr1	181096555	181096758	204	181096611	12.00	7.74386	4.97573	4.18694	GR-356_Ctrl_10D_peak_284
chr1	181112520	181112734	215	181112653	16.00	9.72846	5.36852	6.02673	GR-356_Ctrl_10D_peak_285
chr1	182990452	182990670	219	182990559	20.00	11.22712	5.40011	7.44680	GR-356_Ctrl_10D_peak_286
chr1	183060475	183060744	270	183060575	16.00	7.89826	4.37151	4.32601	GR-356_Ctrl_10D_peak_287
chr1	183163394	183163784	391	183163580	24.00	17.69942	7.89488	13.64293	GR-356_Ctrl_10D_peak_288
chr1	183238126	183238512	387	183238260	21.00	14.56176	6.94749	10.62918	GR-356_Ctrl_10D_peak_289
chr1	183896490	183896936	447	183896730	18.00	11.59671	6.00011	7.79238	GR-356_Ctrl_10D_peak_290
chr1	183916123	183916423	301	183916273	30.00	29.38058	12.57060	24.96702	GR-356_Ctrl_10D_peak_291
chr1	185441609	185441926	318	185441770	18.00	14.64586	7.77285	10.70526	GR-356_Ctrl_10D_peak_292
chr1	187691444	187691799	356	187691611	27.00	23.35164	10.14755	19.09668	GR-356_Ctrl_10D_peak_293
chr1	188090497	188090765	269	188090698	12.00	6.29799	4.10534	2.87237	GR-356_Ctrl_10D_peak_294
chr1	188237660	188237870	211	188237713	14.00	10.30761	6.13646	6.57570	GR-356_Ctrl_10D_peak_295
chr1	192531123	192531398	276	192531241	25.00	11.85501	4.87510	8.04458	GR-356_Ctrl_10D_peak_296
chr1	192559473	192559693	221	192559580	12.00	7.31121	4.71136	3.78466	GR-356_Ctrl_10D_peak_297
chr1	198776620	198777006	387	198776813	60.00	74.58151	24.95494	69.34765	GR-356_Ctrl_10D_peak_298
chr1	199272555	199272835	281	199272682	11.00	7.34068	4.90917	3.80450	GR-356_Ctrl_10D_peak_299
chr1	200415787	200416285	499	200416117	17.00	14.86071	8.17372	10.91427	GR-356_Ctrl_10D_peak_300
chr1	201300001	201300273	273	201300143	17.00	16.24001	9.01384	12.23990	GR-356_Ctrl_10D_peak_301
chr1	201358608	201358878	271	201358724	19.00	19.96593	10.70158	15.82610	GR-356_Ctrl_10D_peak_302
chr1	201383813	201384210	398	201384012	24.00	23.94887	11.50558	19.68544	GR-356_Ctrl_10D_peak_303
chr1	201713571	201713803	233	201713628	14.00	10.30761	6.13646	6.57570	GR-356_Ctrl_10D_peak_304
chr1	201792046	201792305	260	201792215	15.00	8.83037	5.05272	5.18296	GR-356_Ctrl_10D_peak_305
chr1	201849625	201850274	650	201849859	26.00	24.16418	10.94859	19.89068	GR-356_Ctrl_10D_peak_306
chr1	202283999	202284230	232	202284136	16.00	11.68258	6.50673	7.87434	GR-356_Ctrl_10D_peak_307
chr1	203558256	203558712	457	203558477	47.00	55.87600	20.69443	50.93925	GR-356_Ctrl_10D_peak_308
chr1	203663182	203663565	384	203663402	22.00	16.76213	7.91495	12.74396	GR-356_Ctrl_10D_peak_309
chr1	204319557	204319761	205	204319691	16.00	7.89826	4.37151	4.32601	GR-356_Ctrl_10D_peak_310
chr1	204417203	204417497	295	204417324	23.00	16.63569	7.57908	12.62046	GR-356_Ctrl_10D_peak_311
chr1	204575985	204576261	277	204576076	15.00	13.55932	7.89636	9.66147	GR-356_Ctrl_10D_peak_312
chr1	205294535	205294894	360	205294703	17.00	12.73252	6.88948	8.87421	GR-356_Ctrl_10D_peak_313
chr1	205478027	205478384	358	205478198	32.00	32.27741	13.50021	27.79223	GR-356_Ctrl_10D_peak_314
chr1	206280685	206280929	245	206280767	15.00	12.29972	7.12326	8.46976	GR-356_Ctrl_10D_peak_315
chr1	206892577	206892950	374	206892792	57.00	69.72572	23.72765	64.56362	GR-356_Ctrl_10D_peak_316
chr1	207004899	207005134	236	207005026	18.00	14.64586	7.77285	10.70526	GR-356_Ctrl_10D_peak_317
chr1	207025553	207025790	238	207025677	23.00	9.00099	3.96339	5.34871	GR-356_Ctrl_10D_peak_318
chr1	207309776	207310091	316	207309916	36.00	24.03145	8.02426	19.76189	GR-356_Ctrl_10D_peak_319
chr1	207818937	207819204	268	207819062	15.00	14.24963	8.31763	10.33159	GR-356_Ctrl_10D_peak_320
chr1	207847165	207847459	295	207847360	15.00	14.57073	8.51225	10.63709	GR-356_Ctrl_10D_peak_321
chr1	208184462	208184673	212	208184634	12.00	6.29799	4.10534	2.87237	GR-356_Ctrl_10D_peak_322
chr1	208201131	208201550	420	208201383	24.00	14.87636	6.42870	10.92602	GR-356_Ctrl_10D_peak_323
chr1	208207340	208207951	612	208207582	68.00	67.67997	17.74321	62.54818	GR-356_Ctrl_10D_peak_324
chr1	209367446	209367655	210	209367486	14.00	11.55428	6.90335	7.75638	GR-356_Ctrl_10D_peak_325
chr1	209387949	209388227	279	209388092	24.00	21.80094	10.22743	17.60134	GR-356_Ctrl_10D_peak_326
chr1	209527404	209527790	387	209527591	41.00	37.96341	13.26340	33.35011	GR-356_Ctrl_10D_peak_327
chr1	209530925	209531404	480	209531149	58.00	71.33707	24.13674	66.15255	GR-356_Ctrl_10D_peak_328
chr1	209587772	209588144	373	209587895	16.00	14.88028	8.45103	10.92971	GR-356_Ctrl_10D_peak_329
chr1	209657190	209657530	341	209657333	17.00	8.69704	4.62866	5.06540	GR-356_Ctrl_10D_peak_330
chr1	209839935	209840157	223	209839999	13.00	7.03593	4.37622	3.54144	GR-356_Ctrl_10D_peak_331
chr1	209840248	209840554	307	209840384	15.00	9.61549	5.50605	5.92870	GR-356_Ctrl_10D_peak_332
chr1	209873392	209873827	436	209873642	38.00	40.69304	15.95480	36.02562	GR-356_Ctrl_10D_peak_333
chr1	209895723	209896107	385	209895914	44.00	49.50525	18.40938	44.67519	GR-356_Ctrl_10D_peak_334
chr1	210393751	210393958	208	210393867	20.00	13.55309	6.63170	9.65682	GR-356_Ctrl_10D_peak_335
chr1	210394282	210394811	530	210394545	57.00	80.76667	30.15140	75.45041	GR-356_Ctrl_10D_peak_336
chr1	211198142	211198630	489	211198397	121.00	202.06367	60.20973	195.50247	GR-356_Ctrl_10D_peak_337
chr1	211639540	211639742	203	211639630	9.00	5.47361	4.05503	2.12944	GR-356_Ctrl_10D_peak_338
chr1	212596280	212596482	203	212596448	16.00	7.89826	4.37151	4.32601	GR-356_Ctrl_10D_peak_339
chr1	214568479	214568753	275	214568641	16.00	12.32642	6.89355	8.49305	GR-356_Ctrl_10D_peak_340
chr1	214573416	214573800	385	214573612	31.00	30.91800	13.09111	26.46207	GR-356_Ctrl_10D_peak_341
chr1	215475832	215476245	414	215476009	24.00	18.98293	8.60320	14.87765	GR-356_Ctrl_10D_peak_342
chr1	215543320	215543610	291	215543453	13.00	9.28838	5.72736	5.61672	GR-356_Ctrl_10D_peak_343
chr1	216456700	216457060	361	216456885	20.00	13.55309	6.63170	9.65682	GR-356_Ctrl_10D_peak_344
chr1	218377405	218377622	218	218377481	16.00	9.21498	5.08113	5.55103	GR-356_Ctrl_10D_peak_345
chr1	218480313	218480627	315	218480445	23.00	13.93699	6.17155	10.02573	GR-356_Ctrl_10D_peak_346
chr1	218496633	218496961	329	218496824	20.00	15.94079	7.99287	11.95089	GR-356_Ctrl_10D_peak_347
chr1	218498491	218498861	371	218498683	27.00	25.21748	11.22067	20.91540	GR-356_Ctrl_10D_peak_348
chr1	218674336	218674762	427	218674651	21.00	12.11161	5.65725	8.28673	GR-356_Ctrl_10D_peak_349
chr1	218705881	218706566	686	218706371	52.00	46.44353	13.62884	41.66507	GR-356_Ctrl_10D_peak_350
chr1	221440084	221440286	203	221440197	12.00	9.36569	5.98290	5.68975	GR-356_Ctrl_10D_peak_351
chr1	221839890	221840273	384	221840074	42.00	42.97801	15.58374	38.26789	GR-356_Ctrl_10D_peak_352
chr1	221845945	221846373	429	221846182	23.00	23.80840	11.75945	19.54790	GR-356_Ctrl_10D_peak_353
chr1	221869117	221869602	486	221869434	30.00	20.84636	7.97159	16.68005	GR-356_Ctrl_10D_peak_354
chr1	221958108	221958515	408	221958326	25.00	23.05716	10.63653	18.81376	GR-356_Ctrl_10D_peak_355
chr1	221961771	221961973	203	221961849	15.00	10.65720	6.12398	6.90103	GR-356_Ctrl_10D_peak_356
chr1	223700673	223700881	209	223700871	11.00	5.75073	3.93120	2.36754	GR-356_Ctrl_10D_peak_357
chr1	223815924	223816180	257	223816067	19.00	17.38384	9.14278	13.33935	GR-356_Ctrl_10D_peak_358
chr1	224058250	224058612	363	224058452	12.00	10.93743	6.95603	7.17142	GR-356_Ctrl_10D_peak_359
chr1	224065473	224065769	297	224065619	15.00	13.10976	7.62067	9.23928	GR-356_Ctrl_10D_peak_360
chr1	224560066	224560268	203	224560187	11.00	8.95550	5.92227	5.30388	GR-356_Ctrl_10D_peak_361
chr1	224565238	224565588	351	224565399	16.00	14.20884	8.04081	10.29134	GR-356_Ctrl_10D_peak_362
chr1	225655473	225656090	618	225655849	29.00	29.36590	12.93402	24.95514	GR-356_Ctrl_10D_peak_363
chr1	225700167	225700697	531	225700434	31.00	30.72021	12.97610	26.27355	GR-356_Ctrl_10D_peak_364
chr1	225735571	225735902	332	225735717	12.00	9.17548	5.86420	5.51723	GR-356_Ctrl_10D_peak_365
chr1	225736299	225736780	482	225736533	48.00	59.63203	22.39981	54.63189	GR-356_Ctrl_10D_peak_366
chr1	225755319	225755712	394	225755484	16.00	13.04442	7.32928	9.17460	GR-356_Ctrl_10D_peak_367
chr1	227357439	227357677	239	227357573	24.00	17.69942	7.89488	13.64293	GR-356_Ctrl_10D_peak_368
chr1	229844049	229844292	244	229844201	17.00	17.26211	9.63142	13.22009	GR-356_Ctrl_10D_peak_369
chr1	229980090	229980389	300	229980249	16.00	7.89826	4.37151	4.32601	GR-356_Ctrl_10D_peak_370
chr1	230090210	230090581	372	230090355	16.00	13.76839	7.77136	9.86667	GR-356_Ctrl_10D_peak_371
chr1	230104803	230105005	203	230104884	16.00	7.89826	4.37151	4.32601	GR-356_Ctrl_10D_peak_372
chr1	231800159	231800612	454	231800383	29.00	32.51715	14.80567	28.02608	GR-356_Ctrl_10D_peak_373
chr1	232477813	232478089	277	232477980	12.00	6.29799	4.10534	2.87237	GR-356_Ctrl_10D_peak_374
chr1	232538734	232538974	241	232538868	12.00	6.29799	4.10534	2.87237	GR-356_Ctrl_10D_peak_375
chr1	232891087	232891562	476	232891141	13.00	9.20658	5.67704	5.54393	GR-356_Ctrl_10D_peak_376
chr1	234564686	234565095	410	234564856	15.00	9.16004	5.24160	5.50222	GR-356_Ctrl_10D_peak_377
chr1	234612775	234612977	203	234612822	14.00	9.15029	5.43619	5.49398	GR-356_Ctrl_10D_peak_378
chr1	234617266	234617704	439	234617536	29.00	23.25980	9.47386	19.00767	GR-356_Ctrl_10D_peak_379
chr1	234723969	234724272	304	234724132	18.00	10.57462	5.44051	6.82926	GR-356_Ctrl_10D_peak_380
chr1	234772338	234772678	341	234772425	11.00	5.51391	3.78954	2.15920	GR-356_Ctrl_10D_peak_381
chr1	234957468	234957670	203	234957572	14.00	10.30761	6.13646	6.57570	GR-356_Ctrl_10D_peak_382
chr1	234980554	234981275	722	234981027	50.00	56.29239	19.52019	51.35074	GR-356_Ctrl_10D_peak_383
chr1	234984478	234984752	275	234984641	19.00	12.44848	6.25174	8.60573	GR-356_Ctrl_10D_peak_384
chr1	234987123	234987567	445	234987430	15.00	8.83037	5.05272	5.18296	GR-356_Ctrl_10D_peak_385
chr1	234997164	234997694	531	234997401	103.00	118.68661	26.44867	112.89436	GR-356_Ctrl_10D_peak_386
chr1	235011819	235012087	269	235011991	15.00	11.35453	6.54556	7.56438	GR-356_Ctrl_10D_peak_387
chr1	235067413	235068059	647	235067568	19.00	15.78879	8.18195	11.80509	GR-356_Ctrl_10D_peak_388
chr1	235068436	235068679	244	235068539	11.00	7.34068	4.90917	3.80450	GR-356_Ctrl_10D_peak_389
chr1	235070120	235070482	363	235070284	29.00	17.20947	6.50616	13.17059	GR-356_Ctrl_10D_peak_390
chr1	235079098	235079355	258	235079169	15.00	11.35453	6.54556	7.56438	GR-356_Ctrl_10D_peak_391
chr1	235083292	235083544	253	235083411	17.00	10.65101	5.68431	6.89792	GR-356_Ctrl_10D_peak_392
chr1	235910474	235910736	263	235910603	19.00	17.58890	9.26699	13.53812	GR-356_Ctrl_10D_peak_393
chr1	236905229	236905470	242	236905330	15.00	14.65187	8.56126	10.70843	GR-356_Ctrl_10D_peak_394
chr1	237873339	237873640	302	237873500	13.00	9.78813	6.03587	6.07882	GR-356_Ctrl_10D_peak_395
chr1	240765739	240765964	226	240765823	15.00	11.35453	6.54556	7.56438	GR-356_Ctrl_10D_peak_396
chr1	243105182	243105400	219	243105276	12.00	10.93743	6.95603	7.17142	GR-356_Ctrl_10D_peak_397
chr1	243926889	243927107	219	243927000	21.00	14.43295	6.87692	10.51053	GR-356_Ctrl_10D_peak_398
chr1	244163837	244164243	407	244163977	26.00	25.33835	11.64062	21.03123	GR-356_Ctrl_10D_peak_399
chr1	245880969	245881241	273	245881001	13.00	7.11342	4.42113	3.60941	GR-356_Ctrl_10D_peak_400
chr1	246837828	246838193	366	246838014	19.00	15.78879	8.18195	11.80509	GR-356_Ctrl_10D_peak_401
chr10	265012	265306	295	265186	18.00	18.60293	10.16650	14.51703	GR-356_Ctrl_10D_peak_402
chr10	454981	455250	270	455135	18.00	15.34104	8.19154	11.37763	GR-356_Ctrl_10D_peak_403
chr10	2111841	2112264	424	2112080	39.00	41.88634	16.22013	37.19566	GR-356_Ctrl_10D_peak_404
chr10	2119368	2119675	308	2119538	20.00	13.55309	6.63170	9.65682	GR-356_Ctrl_10D_peak_405
chr10	3045653	3046207	555	3046023	16.00	7.89826	4.37151	4.32601	GR-356_Ctrl_10D_peak_406
chr10	3091468	3091862	395	3091634	26.00	23.10785	10.33422	18.86118	GR-356_Ctrl_10D_peak_407
chr10	3095351	3095687	337	3095536	23.00	13.93699	6.17155	10.02573	GR-356_Ctrl_10D_peak_408
chr10	3107350	3107882	533	3107551	32.00	30.76890	12.63071	26.31952	GR-356_Ctrl_10D_peak_409
chr10	3453013	3453296	284	3453206	18.00	14.64586	7.77285	10.70526	GR-356_Ctrl_10D_peak_410
chr10	3805336	3805541	206	3805397	19.00	10.36255	5.14296	6.62581	GR-356_Ctrl_10D_peak_411
chr10	3805858	3806107	250	3805997	16.00	11.68258	6.50673	7.87434	GR-356_Ctrl_10D_peak_412
chr10	3810132	3810610	479	3810328	98.00	111.60067	25.45764	105.89813	GR-356_Ctrl_10D_peak_413
chr10	3811252	3811753	502	3811505	91.00	123.69312	35.21289	117.84820	GR-356_Ctrl_10D_peak_414
chr10	3852090	3852731	642	3852332	36.00	33.58048	12.73274	29.06763	GR-356_Ctrl_10D_peak_415
chr10	3886653	3886973	321	3886829	22.00	15.58957	7.26329	11.61718	GR-356_Ctrl_10D_peak_416
chr10	3887976	3888402	427	3888194	86.00	104.04102	27.47418	98.42575	GR-356_Ctrl_10D_peak_417
chr10	3924517	3924719	203	3924559	8.00	5.75888	4.37834	2.37494	GR-356_Ctrl_10D_peak_418
chr10	3995303	3995536	234	3995374	16.00	9.72846	5.36852	6.02673	GR-356_Ctrl_10D_peak_419
chr10	4242523	4242799	277	4242644	25.00	17.95786	7.77113	13.89315	GR-356_Ctrl_10D_peak_420
chr10	4678025	4678412	388	4678222	44.00	29.26036	8.43768	24.85204	GR-356_Ctrl_10D_peak_421
chr10	4726057	4726259	203	4726158	13.00	9.28838	5.72736	5.61672	GR-356_Ctrl_10D_peak_422
chr10	4776006	4776277	272	4776160	12.00	8.59195	5.50044	4.97527	GR-356_Ctrl_10D_peak_423
chr10	5449930	5450205	276	5450027	16.00	11.09999	6.16101	7.32616	GR-356_Ctrl_10D_peak_424
chr10	6749024	6749235	212	6749106	12.00	10.13615	6.46255	6.41728	GR-356_Ctrl_10D_peak_425
chr10	8361443	8361676	234	8361521	13.00	9.28838	5.72736	5.61672	GR-356_Ctrl_10D_peak_426
chr10	8366401	8366796	396	8366650	16.00	15.85818	9.04427	11.86969	GR-356_Ctrl_10D_peak_427
chr10	8392352	8392578	227	8392430	12.00	8.29870	5.31827	4.69290	GR-356_Ctrl_10D_peak_428
chr10	9762979	9763184	206	9763073	14.00	9.65783	5.74123	5.96542	GR-356_Ctrl_10D_peak_429
chr10	10605902	10606123	222	10605936	12.00	9.36569	5.98290	5.68975	GR-356_Ctrl_10D_peak_430
chr10	10826228	10826549	322	10826362	24.00	26.95008	13.30040	22.59393	GR-356_Ctrl_10D_peak_431
chr10	10831177	10831631	455	10831369	18.00	14.64586	7.77285	10.70526	GR-356_Ctrl_10D_peak_432
chr10	11794057	11794345	289	11794182	14.00	10.84639	6.46701	7.08551	GR-356_Ctrl_10D_peak_433
chr10	11898278	11898825	548	11898441	40.00	36.42405	12.81607	31.85091	GR-356_Ctrl_10D_peak_434
chr10	12246809	12247595	787	12247411	23.00	16.63569	7.57908	12.62046	GR-356_Ctrl_10D_peak_435
chr10	12720438	12720695	258	12720541	20.00	11.22712	5.40011	7.44680	GR-356_Ctrl_10D_peak_436
chr10	13866141	13866493	353	13866300	23.00	11.91056	5.20493	8.09781	GR-356_Ctrl_10D_peak_437
chr10	13882111	13882432	322	13882269	17.00	14.18108	7.76041	10.26550	GR-356_Ctrl_10D_peak_438
chr10	13987625	13987827	203	13987729	10.00	7.14603	4.96202	3.63651	GR-356_Ctrl_10D_peak_439
chr10	14397006	14397421	416	14397188	14.00	7.95815	4.73693	4.37816	GR-356_Ctrl_10D_peak_440
chr10	14572047	14572395	349	14572196	24.00	24.48133	11.82472	20.19242	GR-356_Ctrl_10D_peak_441
chr10	14713002	14713569	568	14713294	24.00	14.87636	6.42870	10.92602	GR-356_Ctrl_10D_peak_442
chr10	14782642	14782938	297	14782777	14.00	7.95815	4.73693	4.37816	GR-356_Ctrl_10D_peak_443
chr10	15200733	15201034	302	15200934	16.00	8.82704	4.86782	5.18296	GR-356_Ctrl_10D_peak_444
chr10	17744489	17744704	216	17744556	14.00	10.21939	6.08255	6.49609	GR-356_Ctrl_10D_peak_445
chr10	19638545	19638773	229	19638704	13.00	9.20658	5.67704	5.54393	GR-356_Ctrl_10D_peak_446
chr10	21002119	21002501	383	21002306	53.00	63.01591	21.89717	57.95694	GR-356_Ctrl_10D_peak_447
chr10	21184248	21184643	396	21184449	41.00	48.73674	19.32938	43.91877	GR-356_Ctrl_10D_peak_448
chr10	22620321	22620539	219	22620372	13.00	6.70232	4.18446	3.22833	GR-356_Ctrl_10D_peak_449
chr10	29141813	29142102	290	29141967	26.00	14.48959	5.85554	10.56558	GR-356_Ctrl_10D_peak_450
chr10	29659052	29659523	472	29659409	15.00	11.35453	6.54556	7.56438	GR-356_Ctrl_10D_peak_451
chr10	29946766	29947207	442	29947007	51.00	36.63741	9.75021	32.05521	GR-356_Ctrl_10D_peak_452
chr10	29947688	29947972	285	29947836	21.00	14.56176	6.94749	10.62918	GR-356_Ctrl_10D_peak_453
chr10	29949452	29950031	580	29949863	26.00	19.87698	8.52647	15.74164	GR-356_Ctrl_10D_peak_454
chr10	30736700	30737039	340	30736882	30.00	29.38058	12.57060	24.96702	GR-356_Ctrl_10D_peak_455
chr10	30776374	30776607	234	30776519	14.00	13.38527	8.02619	9.50636	GR-356_Ctrl_10D_peak_456
chr10	31071647	31071932	286	31071773	20.00	13.55309	6.63170	9.65682	GR-356_Ctrl_10D_peak_457
chr10	31075502	31075841	340	31075642	12.00	8.29870	5.31827	4.69290	GR-356_Ctrl_10D_peak_458
chr10	31101077	31101465	389	31101218	23.00	23.66872	11.67558	19.40965	GR-356_Ctrl_10D_peak_459
chr10	31134702	31134904	203	31134785	11.00	9.76027	6.42095	6.05470	GR-356_Ctrl_10D_peak_460
chr10	31940862	31941159	298	31941018	23.00	11.91056	5.20493	8.09781	GR-356_Ctrl_10D_peak_461
chr10	32692259	32692550	292	32692411	12.00	7.74386	4.97573	4.18694	GR-356_Ctrl_10D_peak_462
chr10	32953220	32953555	336	32953343	22.00	18.30915	8.80322	14.23111	GR-356_Ctrl_10D_peak_463
chr10	33129394	33129960	567	33129514	18.00	15.96695	8.57076	11.97417	GR-356_Ctrl_10D_peak_464
chr10	33216582	33217017	436	33216791	24.00	21.80094	10.22743	17.60134	GR-356_Ctrl_10D_peak_465
chr10	33248584	33248905	322	33248749	21.00	14.56176	6.94749	10.62918	GR-356_Ctrl_10D_peak_466
chr10	33263468	33263957	490	33263779	16.00	12.39463	6.93478	8.55947	GR-356_Ctrl_10D_peak_467
chr10	33264174	33264591	418	33264450	35.00	30.39722	11.36863	25.95806	GR-356_Ctrl_10D_peak_468
chr10	33747125	33747327	203	33747229	10.00	6.41677	4.50007	2.96268	GR-356_Ctrl_10D_peak_469
chr10	34254616	34254889	274	34254737	16.00	13.04442	7.32928	9.17460	GR-356_Ctrl_10D_peak_470
chr10	34280692	34280927	236	34280845	20.00	13.55309	6.63170	9.65682	GR-356_Ctrl_10D_peak_471
chr10	34584238	34584556	319	34584389	23.00	20.56168	9.81834	16.40304	GR-356_Ctrl_10D_peak_472
chr10	35005857	35006332	476	35006136	36.00	37.61062	15.00362	33.01239	GR-356_Ctrl_10D_peak_473
chr10	43613602	43613950	349	43613804	33.00	33.64975	13.90931	29.13270	GR-356_Ctrl_10D_peak_474
chr10	45160405	45160712	308	45160578	12.00	10.93743	6.95603	7.17142	GR-356_Ctrl_10D_peak_475
chr10	46311988	46312230	243	46312070	16.00	11.09999	6.16101	7.32616	GR-356_Ctrl_10D_peak_476
chr10	46396745	46397043	299	46396894	39.00	27.13477	8.67488	22.77430	GR-356_Ctrl_10D_peak_477
chr10	46463444	46463768	325	46463616	24.00	17.69942	7.89488	13.64293	GR-356_Ctrl_10D_peak_478
chr10	46524588	46524925	338	46524787	19.00	11.94822	5.97779	8.13198	GR-356_Ctrl_10D_peak_479
chr10	46639951	46640424	474	46640036	17.00	16.02543	8.88340	12.02762	GR-356_Ctrl_10D_peak_480
chr10	47412879	47413171	293	47412994	18.00	18.50580	10.10830	14.42476	GR-356_Ctrl_10D_peak_481
chr10	47462612	47463069	458	47462808	36.00	31.63035	11.68442	27.16101	GR-356_Ctrl_10D_peak_482
chr10	47701328	47701759	432	47701518	56.00	58.39266	18.00033	53.41202	GR-356_Ctrl_10D_peak_483
chr10	47920912	47921172	261	47921054	16.00	14.78004	8.38988	10.83391	GR-356_Ctrl_10D_peak_484
chr10	47988025	47988402	378	47988205	36.00	30.42965	11.05892	25.98978	GR-356_Ctrl_10D_peak_485
chr10	47989111	47989403	293	47989231	22.00	13.01516	5.91440	9.14773	GR-356_Ctrl_10D_peak_486
chr10	48606691	48607231	541	48606935	19.00	18.82473	10.01538	14.72344	GR-356_Ctrl_10D_peak_487
chr10	49552124	49552674	551	49552310	62.00	67.06905	19.89510	61.94301	GR-356_Ctrl_10D_peak_488
chr10	49568344	49568559	216	49568474	17.00	10.65101	5.68431	6.89792	GR-356_Ctrl_10D_peak_489
chr10	50393784	50394096	313	50393925	31.00	30.72021	12.97610	26.27355	GR-356_Ctrl_10D_peak_490
chr10	52318979	52319374	396	52319203	19.00	12.56442	6.31590	8.71315	GR-356_Ctrl_10D_peak_491
chr10	52486891	52487180	290	52486961	15.00	7.12379	4.11437	3.61532	GR-356_Ctrl_10D_peak_492
chr10	52541245	52541473	229	52541341	15.00	12.85513	7.46430	8.99457	GR-356_Ctrl_10D_peak_493
chr10	58322485	58322708	224	58322649	14.00	10.30761	6.13646	6.57570	GR-356_Ctrl_10D_peak_494
chr10	58412629	58412871	243	58412755	14.00	12.54167	7.51153	8.69780	GR-356_Ctrl_10D_peak_495
chr10	58821002	58821228	227	58821168	10.00	6.41677	4.50007	2.96268	GR-356_Ctrl_10D_peak_496
chr10	58856526	58856977	452	58856757	49.00	59.02483	21.55670	54.03531	GR-356_Ctrl_10D_peak_497
chr10	59388066	59388315	250	59388153	12.00	10.13615	6.46255	6.41728	GR-356_Ctrl_10D_peak_498
chr10	60956146	60956501	356	60956334	30.00	26.03306	10.66797	21.70448	GR-356_Ctrl_10D_peak_499
chr10	61628823	61629119	297	61628973	33.00	33.43903	13.78711	28.93029	GR-356_Ctrl_10D_peak_500
chr10	62048128	62048491	364	62048308	37.00	39.84022	15.88118	35.19463	GR-356_Ctrl_10D_peak_501
chr10	62099461	62099700	240	62099608	19.00	18.82473	10.01538	14.72344	GR-356_Ctrl_10D_peak_502
chr10	62384645	62384927	283	62384828	13.00	8.68610	5.35848	5.06032	GR-356_Ctrl_10D_peak_503
chr10	63700552	63700849	298	63700739	13.00	10.51574	6.48690	6.77479	GR-356_Ctrl_10D_peak_504
chr10	68105815	68106155	341	68105988	27.00	20.98960	8.84227	16.81438	GR-356_Ctrl_10D_peak_505
chr10	68648001	68648270	270	68648103	15.00	12.69114	7.36357	8.83583	GR-356_Ctrl_10D_peak_506
chr10	69061450	69061981	532	69061659	53.00	51.00896	15.46249	46.15382	GR-356_Ctrl_10D_peak_507
chr10	70578427	70578761	335	70578595	25.00	22.89809	10.54308	18.66389	GR-356_Ctrl_10D_peak_508
chr10	70656350	70656842	493	70656541	22.00	20.19188	9.91608	16.04475	GR-356_Ctrl_10D_peak_509
chr10	70664757	70665152	396	70664948	24.00	21.80094	10.22743	17.60134	GR-356_Ctrl_10D_peak_510
chr10	71766789	71767101	313	71766918	29.00	28.23959	12.27292	23.85041	GR-356_Ctrl_10D_peak_511
chr10	71832025	71832227	203	71832146	11.00	7.76250	5.17361	4.20185	GR-356_Ctrl_10D_peak_512
chr10	71976040	71976304	265	71976149	12.00	10.06080	6.41579	6.34686	GR-356_Ctrl_10D_peak_513
chr10	72248702	72249234	533	72248970	64.00	73.52491	22.36833	68.30643	GR-356_Ctrl_10D_peak_514
chr10	72255073	72255558	486	72255303	29.00	34.61983	16.05237	30.08582	GR-356_Ctrl_10D_peak_515
chr10	72334948	72335255	308	72335102	31.00	25.58671	10.10545	21.27127	GR-356_Ctrl_10D_peak_516
chr10	73117903	73118227	325	73118068	35.00	26.20401	9.25733	21.87060	GR-356_Ctrl_10D_peak_517
chr10	74056093	74056855	763	74056556	100.00	105.20634	21.90407	99.57823	GR-356_Ctrl_10D_peak_518
chr10	75225426	75225747	322	75225626	15.00	8.83037	5.05272	5.18296	GR-356_Ctrl_10D_peak_519
chr10	75764417	75764822	406	75764645	13.00	7.11342	4.42113	3.60941	GR-356_Ctrl_10D_peak_520
chr10	75773498	75773810	313	75773646	19.00	12.56442	6.31590	8.71315	GR-356_Ctrl_10D_peak_521
chr10	76103234	76103515	282	76103327	11.00	5.51391	3.78954	2.15920	GR-356_Ctrl_10D_peak_522
chr10	76114128	76114410	283	76114270	14.00	6.37500	3.85722	2.93436	GR-356_Ctrl_10D_peak_523
chr10	76543690	76543979	290	76543823	24.00	17.69942	7.89488	13.64293	GR-356_Ctrl_10D_peak_524
chr10	76583730	76584048	319	76583887	17.00	14.18108	7.76041	10.26550	GR-356_Ctrl_10D_peak_525
chr10	77164009	77164226	218	77164144	23.00	15.88221	7.17335	11.89270	GR-356_Ctrl_10D_peak_526
chr10	77179416	77179658	243	77179552	14.00	10.30761	6.13646	6.57570	GR-356_Ctrl_10D_peak_527
chr10	77290982	77291186	205	77291088	14.00	7.95815	4.73693	4.37816	GR-356_Ctrl_10D_peak_528
chr10	77355919	77356192	274	77356018	21.00	15.03150	7.20720	11.07672	GR-356_Ctrl_10D_peak_529
chr10	77392728	77393181	454	77392952	21.00	15.67889	7.57082	11.70144	GR-356_Ctrl_10D_peak_530
chr10	77416461	77416706	246	77416558	17.00	10.65101	5.68431	6.89792	GR-356_Ctrl_10D_peak_531
chr10	77478240	77478530	291	77478404	21.00	14.56176	6.94749	10.62918	GR-356_Ctrl_10D_peak_532
chr10	77737558	77737929	372	77737758	25.00	22.89809	10.54308	18.66389	GR-356_Ctrl_10D_peak_533
chr10	78256134	78256542	409	78256330	32.00	26.77034	10.42124	22.42191	GR-356_Ctrl_10D_peak_534
chr10	79329639	79329859	221	79329757	26.00	16.80506	6.94299	12.78369	GR-356_Ctrl_10D_peak_535
chr10	80542069	80542271	203	80542121	9.00	7.46279	5.32016	3.92089	GR-356_Ctrl_10D_peak_536
chr10	86786416	86786642	227	86786588	11.00	7.34068	4.90917	3.80450	GR-356_Ctrl_10D_peak_537
chr10	88500220	88500439	220	88500288	13.00	12.07600	7.44822	8.25623	GR-356_Ctrl_10D_peak_538
chr10	89476860	89477146	287	89477014	14.00	11.55428	6.90335	7.75638	GR-356_Ctrl_10D_peak_539
chr10	89481656	89482079	424	89481841	45.00	58.80959	23.37864	53.82228	GR-356_Ctrl_10D_peak_540
chr10	89916548	89916750	203	89916719	9.00	5.52982	4.09097	2.16270	GR-356_Ctrl_10D_peak_541
chr10	90179628	90179988	361	90179863	25.00	28.42130	13.83241	24.02906	GR-356_Ctrl_10D_peak_542
chr10	90227291	90227689	399	90227438	20.00	20.02218	10.43950	15.88071	GR-356_Ctrl_10D_peak_543
chr10	90418880	90419106	227	90419000	13.00	12.07600	7.44822	8.25623	GR-356_Ctrl_10D_peak_544
chr10	90921079	90921734	656	90921497	70.00	70.45540	18.25750	65.28127	GR-356_Ctrl_10D_peak_545
chr10	90931141	90931574	434	90931338	28.00	16.28809	6.28929	12.28464	GR-356_Ctrl_10D_peak_546
chr10	90960376	90960869	494	90960609	42.00	30.33422	9.32549	25.89925	GR-356_Ctrl_10D_peak_547
chr10	90970012	90970229	218	90970036	11.00	8.31799	5.52268	4.70885	GR-356_Ctrl_10D_peak_548
chr10	91414517	91414745	229	91414566	12.00	7.74386	4.97573	4.18694	GR-356_Ctrl_10D_peak_549
chr10	91642858	91643334	477	91643133	56.00	51.57916	14.65743	46.71028	GR-356_Ctrl_10D_peak_550
chr10	93471207	93471514	308	93471313	17.00	10.65101	5.68431	6.89792	GR-356_Ctrl_10D_peak_551
chr10	95229604	95229909	306	95229733	19.00	17.48569	9.20447	13.43903	GR-356_Ctrl_10D_peak_552
chr10	95273378	95273842	465	95273640	41.00	33.02191	10.80021	28.52013	GR-356_Ctrl_10D_peak_553
chr10	97596696	97597094	399	97596905	42.00	30.33422	9.32549	25.89925	GR-356_Ctrl_10D_peak_554
chr10	97882552	97882831	280	97882679	16.00	12.32642	6.89355	8.49305	GR-356_Ctrl_10D_peak_555
chr10	98460895	98461139	245	98460982	22.00	17.50084	8.33549	13.45208	GR-356_Ctrl_10D_peak_556
chr10	99966215	99966687	473	99966416	26.00	14.48959	5.85554	10.56558	GR-356_Ctrl_10D_peak_557
chr10	103231307	103231580	274	103231418	17.00	12.86395	6.96768	9.00331	GR-356_Ctrl_10D_peak_558
chr10	103504273	103504738	466	103504491	43.00	39.12799	13.15115	34.49749	GR-356_Ctrl_10D_peak_559
chr10	103908246	103908646	401	103908444	27.00	20.98960	8.84227	16.81438	GR-356_Ctrl_10D_peak_560
chr10	104109997	104110277	281	104110156	14.00	12.36472	7.40284	8.52987	GR-356_Ctrl_10D_peak_561
chr10	104260647	104260889	243	104260832	10.00	7.94746	5.46831	4.37451	GR-356_Ctrl_10D_peak_562
chr10	104809570	104809859	290	104809709	9.00	6.32821	4.60223	2.89837	GR-356_Ctrl_10D_peak_563
chr10	110323512	110323854	343	110323660	14.00	7.95815	4.73693	4.37816	GR-356_Ctrl_10D_peak_564
chr10	110326688	110326922	235	110326817	13.00	10.58728	6.53126	6.84165	GR-356_Ctrl_10D_peak_565
chr10	110399257	110399682	426	110399493	49.00	42.67640	12.85740	37.97272	GR-356_Ctrl_10D_peak_566
chr10	110447296	110447569	274	110447471	12.00	7.31121	4.71136	3.78466	GR-356_Ctrl_10D_peak_567
chr10	112360980	112361187	208	112361110	15.00	8.83037	5.05272	5.18296	GR-356_Ctrl_10D_peak_568
chr10	112631625	112631932	308	112631767	23.00	25.61965	12.84190	21.29597	GR-356_Ctrl_10D_peak_569
chr10	113073877	113074250	374	113073963	17.00	12.73252	6.88948	8.87421	GR-356_Ctrl_10D_peak_570
chr10	114648415	114648649	235	114648557	13.00	7.11342	4.42113	3.60941	GR-356_Ctrl_10D_peak_571
chr10	118798340	118798542	203	118798450	13.00	8.68610	5.35848	5.06032	GR-356_Ctrl_10D_peak_572
chr10	119658340	119658630	291	119658501	31.00	32.12278	13.79629	27.64347	GR-356_Ctrl_10D_peak_573
chr10	120455086	120455364	279	120455274	17.00	10.54790	5.62657	6.80508	GR-356_Ctrl_10D_peak_574
chr10	120460814	120461158	345	120461003	35.00	30.39722	11.36863	25.95806	GR-356_Ctrl_10D_peak_575
chr10	122146949	122147164	216	122147040	17.00	12.11236	6.52343	8.28673	GR-356_Ctrl_10D_peak_576
chr10	122264147	122264392	246	122264248	20.00	11.22712	5.40011	7.44680	GR-356_Ctrl_10D_peak_577
chr10	122468980	122469356	377	122469146	21.00	10.27760	4.77118	6.55237	GR-356_Ctrl_10D_peak_578
chr10	122582623	122582914	292	122582787	29.00	23.25980	9.47386	19.00767	GR-356_Ctrl_10D_peak_579
chr10	122595330	122595636	307	122595494	28.00	22.11738	9.15806	17.90403	GR-356_Ctrl_10D_peak_580
chr10	122601898	122602125	228	122602024	13.00	11.19792	6.90931	7.42110	GR-356_Ctrl_10D_peak_581
chr10	122605883	122606108	226	122606058	15.00	14.65187	8.56126	10.70843	GR-356_Ctrl_10D_peak_582
chr10	122609926	122610156	231	122610052	16.00	15.94465	9.09634	11.95197	GR-356_Ctrl_10D_peak_583
chr10	122614098	122614307	210	122614140	11.00	9.76027	6.42095	6.05470	GR-356_Ctrl_10D_peak_584
chr10	122861651	122861978	328	122861843	27.00	20.98960	8.84227	16.81438	GR-356_Ctrl_10D_peak_585
chr10	124906734	124907036	303	124906873	22.00	13.01516	5.91440	9.14773	GR-356_Ctrl_10D_peak_586
chr10	125201331	125201596	266	125201432	13.00	7.11342	4.42113	3.60941	GR-356_Ctrl_10D_peak_587
chr10	125236135	125236519	385	125236352	35.00	30.39722	11.36863	25.95806	GR-356_Ctrl_10D_peak_588
chr10	126270161	126270513	353	126270314	19.00	14.90097	7.65498	10.94791	GR-356_Ctrl_10D_peak_589
chr10	126398099	126398306	208	126398214	15.00	11.25988	6.48805	7.47609	GR-356_Ctrl_10D_peak_590
chr10	127889650	127889862	213	127889781	15.00	14.65187	8.56126	10.70843	GR-356_Ctrl_10D_peak_591
chr10	132482156	132482583	428	132482356	61.00	65.60525	19.57930	60.50232	GR-356_Ctrl_10D_peak_592
chr10	132685658	132685907	250	132685797	24.00	20.67458	9.56872	16.51237	GR-356_Ctrl_10D_peak_593
chr11	1219590	1220346	757	1220145	21.00	22.75427	11.77174	18.52430	GR-356_Ctrl_10D_peak_594
chr11	1220965	1221302	338	1221115	12.00	10.93743	6.95603	7.17142	GR-356_Ctrl_10D_peak_595
chr11	1221470	1221858	389	1221659	10.00	6.41677	4.50007	2.96268	GR-356_Ctrl_10D_peak_596
chr11	1222121	1222323	203	1222258	9.00	7.51202	5.35079	3.96361	GR-356_Ctrl_10D_peak_597
chr11	1222417	1222947	531	1222611	12.00	9.36569	5.98290	5.68975	GR-356_Ctrl_10D_peak_598
chr11	1772243	1772744	502	1772415	10.00	7.30453	5.06246	3.78107	GR-356_Ctrl_10D_peak_599
chr11	1827279	1827557	279	1827403	25.00	10.41423	4.29367	6.67642	GR-356_Ctrl_10D_peak_600
chr11	1829091	1829387	297	1829278	22.00	19.34005	9.40924	15.22368	GR-356_Ctrl_10D_peak_601
chr11	3124390	3124736	347	3124566	29.00	23.25980	9.47386	19.00767	GR-356_Ctrl_10D_peak_602
chr11	5364191	5364515	325	5364382	14.00	10.30761	6.13646	6.57570	GR-356_Ctrl_10D_peak_603
chr11	7977375	7977577	203	7977434	13.00	9.20658	5.67704	5.54393	GR-356_Ctrl_10D_peak_604
chr11	8917498	8917710	213	8917679	17.00	11.02729	5.89680	7.25848	GR-356_Ctrl_10D_peak_605
chr11	9569015	9569230	216	9569119	16.00	11.68258	6.50673	7.87434	GR-356_Ctrl_10D_peak_606
chr11	9906053	9906273	221	9906137	24.00	14.87636	6.42870	10.92602	GR-356_Ctrl_10D_peak_607
chr11	10400862	10401258	397	10401046	16.00	15.94465	9.09634	11.95197	GR-356_Ctrl_10D_peak_608
chr11	10407129	10407359	231	10407253	17.00	11.54664	6.19431	7.75095	GR-356_Ctrl_10D_peak_609
chr11	10490540	10490826	287	10490700	25.00	18.78006	8.21068	14.68246	GR-356_Ctrl_10D_peak_610
chr11	10659695	10659972	278	10659826	32.00	22.95109	8.48588	18.71434	GR-356_Ctrl_10D_peak_611
chr11	11993858	11994190	333	11994024	26.00	24.16418	10.94859	19.89068	GR-356_Ctrl_10D_peak_612
chr11	12070452	12070663	212	12070515	15.00	12.45324	7.21748	8.61014	GR-356_Ctrl_10D_peak_613
chr11	12164158	12164627	470	12164473	24.00	21.75133	10.19821	17.55684	GR-356_Ctrl_10D_peak_614
chr11	12176005	12176274	270	12176123	26.00	16.64855	6.86648	12.63309	GR-356_Ctrl_10D_peak_615
chr11	12182771	12182973	203	12182821	12.00	6.55795	4.25880	3.08811	GR-356_Ctrl_10D_peak_616
chr11	12183176	12183519	344	12183347	22.00	19.01469	9.21698	14.90924	GR-356_Ctrl_10D_peak_617
chr11	12200348	12200707	360	12200507	32.00	34.14828	14.59646	29.62177	GR-356_Ctrl_10D_peak_618
chr11	12625679	12626052	374	12625867	21.00	14.56176	6.94749	10.62918	GR-356_Ctrl_10D_peak_619
chr11	13118453	13118796	344	13118643	13.00	7.11342	4.42113	3.60941	GR-356_Ctrl_10D_peak_620
chr11	13126556	13126776	221	13126714	17.00	13.52504	7.36375	9.63421	GR-356_Ctrl_10D_peak_621
chr11	13260523	13260849	327	13260714	17.00	13.41753	7.29906	9.53508	GR-356_Ctrl_10D_peak_622
chr11	13942977	13943207	231	13943108	13.00	12.07600	7.44822	8.25623	GR-356_Ctrl_10D_peak_623
chr11	14422344	14422665	322	14422533	16.00	6.54374	3.68682	3.07554	GR-356_Ctrl_10D_peak_624
chr11	15106631	15106895	265	15106764	19.00	16.52311	8.62268	12.51361	GR-356_Ctrl_10D_peak_625
chr11	15123818	15124149	332	15123994	12.00	6.29799	4.10534	2.87237	GR-356_Ctrl_10D_peak_626
chr11	16925694	16926034	341	16925841	14.00	6.37500	3.85722	2.93436	GR-356_Ctrl_10D_peak_627
chr11	17012658	17013245	588	17012970	32.00	32.27741	13.50021	27.79223	GR-356_Ctrl_10D_peak_628
chr11	17171478	17171680	203	17171568	14.00	10.21939	6.08255	6.49609	GR-356_Ctrl_10D_peak_629
chr11	17256532	17256734	203	17256666	15.00	8.83037	5.05272	5.18296	GR-356_Ctrl_10D_peak_630
chr11	17790565	17790768	204	17790665	12.00	10.93743	6.95603	7.17142	GR-356_Ctrl_10D_peak_631
chr11	18384484	18384694	211	18384495	12.00	10.13615	6.46255	6.41728	GR-356_Ctrl_10D_peak_632
chr11	18394024	18394361	338	18394120	15.00	7.12379	4.11437	3.61532	GR-356_Ctrl_10D_peak_633
chr11	19367117	19367461	345	19367190	10.00	7.64223	5.27605	4.09078	GR-356_Ctrl_10D_peak_634
chr11	19597802	19598069	268	19597949	17.00	13.52504	7.36375	9.63421	GR-356_Ctrl_10D_peak_635
chr11	19628035	19628516	482	19628252	58.00	61.25594	18.63192	56.22491	GR-356_Ctrl_10D_peak_636
chr11	19715476	19715764	289	19715572	16.00	11.68258	6.50673	7.87434	GR-356_Ctrl_10D_peak_637
chr11	23897518	23897864	347	23897692	25.00	23.05716	10.63653	18.81376	GR-356_Ctrl_10D_peak_638
chr11	27927051	27927420	370	27927253	19.00	18.12657	9.59282	14.05801	GR-356_Ctrl_10D_peak_639
chr11	28836299	28836690	392	28836459	17.00	11.88003	6.38767	8.06914	GR-356_Ctrl_10D_peak_640
chr11	28860952	28861260	309	28861109	27.00	25.61799	11.45473	21.29588	GR-356_Ctrl_10D_peak_641
chr11	29282426	29282670	245	29282484	11.00	7.27170	4.86604	3.75222	GR-356_Ctrl_10D_peak_642
chr11	29300553	29300842	290	29300732	16.00	11.68258	6.50673	7.87434	GR-356_Ctrl_10D_peak_643
chr11	29306512	29306768	257	29306669	14.00	10.21939	6.08255	6.49609	GR-356_Ctrl_10D_peak_644
chr11	31437576	31437826	251	31437671	15.00	11.35453	6.54556	7.56438	GR-356_Ctrl_10D_peak_645
chr11	33690305	33690841	537	33690573	45.00	37.77456	11.82880	33.17066	GR-356_Ctrl_10D_peak_646
chr11	33701287	33701712	426	33701563	32.00	30.76890	12.63071	26.31952	GR-356_Ctrl_10D_peak_647
chr11	33723232	33723506	275	33723419	16.00	12.32642	6.89355	8.49305	GR-356_Ctrl_10D_peak_648
chr11	34318535	34318980	446	34318729	34.00	29.17595	11.05283	24.77007	GR-356_Ctrl_10D_peak_649
chr11	34344988	34345547	560	34345162	20.00	19.41447	10.07246	15.29690	GR-356_Ctrl_10D_peak_650
chr11	34599584	34599786	203	34599659	17.00	8.69704	4.62866	5.06540	GR-356_Ctrl_10D_peak_651
chr11	34654896	34655100	205	34655042	11.00	7.27170	4.86604	3.75222	GR-356_Ctrl_10D_peak_652
chr11	34750186	34750620	435	34750430	52.00	59.31808	20.28569	54.32299	GR-356_Ctrl_10D_peak_653
chr11	35214584	35215015	432	35214773	14.00	10.30761	6.13646	6.57570	GR-356_Ctrl_10D_peak_654
chr11	35620367	35620569	203	35620434	13.00	8.08358	4.99417	4.49943	GR-356_Ctrl_10D_peak_655
chr11	35630025	35630250	226	35630159	13.00	8.68610	5.35848	5.06032	GR-356_Ctrl_10D_peak_656
chr11	35796748	35796964	217	35796870	15.00	11.93237	6.89814	8.11718	GR-356_Ctrl_10D_peak_657
chr11	35908001	35908470	470	35908262	66.00	58.74534	14.53042	53.75876	GR-356_Ctrl_10D_peak_658
chr11	36034881	36035221	341	36035043	13.00	9.28838	5.72736	5.61672	GR-356_Ctrl_10D_peak_659
chr11	36149725	36150022	298	36149854	18.00	14.64586	7.77285	10.70526	GR-356_Ctrl_10D_peak_660
chr11	36354552	36354979	428	36354802	53.00	65.42432	23.28123	60.32663	GR-356_Ctrl_10D_peak_661
chr11	36455625	36456018	394	36455880	14.00	7.95815	4.73693	4.37816	GR-356_Ctrl_10D_peak_662
chr11	36469690	36470246	557	36469920	38.00	40.69304	15.95480	36.02562	GR-356_Ctrl_10D_peak_663
chr11	40445345	40445547	203	40445481	11.00	7.27170	4.86604	3.75222	GR-356_Ctrl_10D_peak_664
chr11	45089303	45089604	302	45089424	14.00	7.95815	4.73693	4.37816	GR-356_Ctrl_10D_peak_665
chr11	45093247	45093531	285	45093377	19.00	14.90097	7.65498	10.94791	GR-356_Ctrl_10D_peak_666
chr11	45097671	45098146	476	45097974	39.00	30.70580	10.28592	26.26149	GR-356_Ctrl_10D_peak_667
chr11	45557441	45557667	227	45557559	17.00	17.26211	9.63142	13.22009	GR-356_Ctrl_10D_peak_668
chr11	46649349	46649557	209	46649401	17.00	11.54664	6.19431	7.75095	GR-356_Ctrl_10D_peak_669
chr11	47858356	47858575	220	47858472	20.00	14.61480	7.22669	10.67925	GR-356_Ctrl_10D_peak_670
chr11	47905673	47905919	247	47905799	11.00	9.16625	6.05367	5.50818	GR-356_Ctrl_10D_peak_671
chr11	47939622	47939833	212	47939713	18.00	13.80571	7.27223	9.90112	GR-356_Ctrl_10D_peak_672
chr11	47947071	47947575	505	47947305	26.00	16.80506	6.94299	12.78369	GR-356_Ctrl_10D_peak_673
chr11	47974224	47974726	503	47974426	50.00	49.98831	16.10555	45.14877	GR-356_Ctrl_10D_peak_674
chr11	48055871	48056156	286	48055978	23.00	22.99943	11.27356	18.76236	GR-356_Ctrl_10D_peak_675
chr11	48081233	48081456	224	48081321	16.00	7.89826	4.37151	4.32601	GR-356_Ctrl_10D_peak_676
chr11	58787908	58788110	203	58787982	12.00	8.29870	5.31827	4.69290	GR-356_Ctrl_10D_peak_677
chr11	58919690	58919892	203	58919795	14.00	7.95815	4.73693	4.37816	GR-356_Ctrl_10D_peak_678
chr11	59545346	59545611	266	59545469	19.00	8.72066	4.33744	5.08718	GR-356_Ctrl_10D_peak_679
chr11	59706878	59707193	316	59707027	29.00	19.81433	7.71444	15.68581	GR-356_Ctrl_10D_peak_680
chr11	61297656	61297983	328	61297805	14.00	13.38527	8.02619	9.50636	GR-356_Ctrl_10D_peak_681
chr11	61695497	61695768	272	61695668	23.00	16.63569	7.57908	12.62046	GR-356_Ctrl_10D_peak_682
chr11	61961528	61961730	203	61961686	11.00	7.34068	4.90917	3.80450	GR-356_Ctrl_10D_peak_683
chr11	61971733	61972059	327	61971936	14.00	9.65783	5.74123	5.96542	GR-356_Ctrl_10D_peak_684
chr11	62553543	62554252	710	62554005	43.00	47.73610	17.84214	42.93351	GR-356_Ctrl_10D_peak_685
chr11	62841455	62841847	393	62841568	19.00	8.72066	4.33744	5.08718	GR-356_Ctrl_10D_peak_686
chr11	65915789	65916018	230	65915990	11.00	6.83321	4.59299	3.34891	GR-356_Ctrl_10D_peak_687
chr11	66336511	66336818	308	66336633	13.00	11.19792	6.90931	7.42110	GR-356_Ctrl_10D_peak_688
chr11	66886850	66887089	240	66887019	10.00	7.58390	5.23921	4.03319	GR-356_Ctrl_10D_peak_689
chr11	66971031	66971240	210	66971139	14.00	10.30761	6.13646	6.57570	GR-356_Ctrl_10D_peak_690
chr11	67374180	67374489	310	67374320	22.00	15.58957	7.26329	11.61718	GR-356_Ctrl_10D_peak_691
chr11	68651791	68652066	276	68651903	16.00	15.94465	9.09634	11.95197	GR-356_Ctrl_10D_peak_692
chr11	69076171	69076609	439	69076457	18.00	17.18315	9.30957	13.14603	GR-356_Ctrl_10D_peak_693
chr11	69080461	69080663	203	69080570	11.00	8.62515	5.71550	5.00334	GR-356_Ctrl_10D_peak_694
chr11	69122902	69123271	370	69123095	22.00	24.05927	12.23636	19.78887	GR-356_Ctrl_10D_peak_695
chr11	69280809	69281296	488	69281089	25.00	26.74192	12.83158	22.39920	GR-356_Ctrl_10D_peak_696
chr11	69297400	69297659	260	69297576	18.00	12.54767	6.53844	8.70243	GR-356_Ctrl_10D_peak_697
chr11	69497251	69497538	288	69497376	22.00	18.30915	8.80322	14.23111	GR-356_Ctrl_10D_peak_698
chr11	70482120	70482464	345	70482272	26.00	28.65787	13.62076	24.25947	GR-356_Ctrl_10D_peak_699
chr11	71299282	71299565	284	71299404	14.00	9.65783	5.74123	5.96542	GR-356_Ctrl_10D_peak_700
chr11	72975924	72976126	203	72976000	17.00	8.69704	4.62866	5.06540	GR-356_Ctrl_10D_peak_701
chr11	73494024	73494257	234	73494138	8.00	5.90822	4.47407	2.51134	GR-356_Ctrl_10D_peak_702
chr11	74139887	74140327	441	74140135	33.00	27.96687	10.73704	23.59138	GR-356_Ctrl_10D_peak_703
chr11	74268433	74268650	218	74268501	12.00	6.29799	4.10534	2.87237	GR-356_Ctrl_10D_peak_704
chr11	74278642	74278920	279	74278826	19.00	13.57074	6.88256	9.67154	GR-356_Ctrl_10D_peak_705
chr11	74671754	74672036	283	74671887	13.00	5.65348	3.60007	2.27384	GR-356_Ctrl_10D_peak_706
chr11	75036021	75036383	363	75036193	17.00	16.34980	9.08051	12.34554	GR-356_Ctrl_10D_peak_707
chr11	79415105	79415375	271	79415204	21.00	19.90144	10.05706	15.76406	GR-356_Ctrl_10D_peak_708
chr11	80163069	80163315	247	80163166	18.00	11.99634	6.22440	8.17827	GR-356_Ctrl_10D_peak_709
chr11	86174279	86174524	246	86174428	16.00	9.63178	5.31398	5.94279	GR-356_Ctrl_10D_peak_710
chr11	86474173	86474375	203	86474247	12.00	9.36569	5.98290	5.68975	GR-356_Ctrl_10D_peak_711
chr11	86547832	86548100	269	86547961	16.00	14.39375	8.15389	10.47254	GR-356_Ctrl_10D_peak_712
chr11	86559562	86559933	372	86559744	28.00	28.69768	12.91092	24.29884	GR-356_Ctrl_10D_peak_713
chr11	86632907	86633185	279	86633024	12.00	8.29870	5.31827	4.69290	GR-356_Ctrl_10D_peak_714
chr11	86743606	86743830	225	86743613	13.00	4.58475	3.03621	1.36327	GR-356_Ctrl_10D_peak_715
chr11	88554939	88555352	414	88555175	32.00	26.77034	10.42124	22.42191	GR-356_Ctrl_10D_peak_716
chr11	91100562	91100827	266	91100698	18.00	11.59671	6.00011	7.79238	GR-356_Ctrl_10D_peak_717
chr11	94136317	94136624	308	94136486	29.00	28.05470	12.16509	23.67362	GR-356_Ctrl_10D_peak_718
chr11	94794286	94794814	529	94794455	15.00	10.65720	6.12398	6.90103	GR-356_Ctrl_10D_peak_719
chr11	95977694	95977896	203	95977818	12.00	8.29870	5.31827	4.69290	GR-356_Ctrl_10D_peak_720
chr11	96212548	96212762	215	96212652	17.00	8.69704	4.62866	5.06540	GR-356_Ctrl_10D_peak_721
chr11	96338842	96339095	254	96338993	15.00	12.15004	7.03147	8.32142	GR-356_Ctrl_10D_peak_722
chr11	99693947	99694216	270	99694099	19.00	12.56442	6.31590	8.71315	GR-356_Ctrl_10D_peak_723
chr11	102306182	102306726	545	102306456	56.00	80.15765	30.32490	74.84853	GR-356_Ctrl_10D_peak_724
chr11	102312781	102313044	264	102312922	14.00	11.47930	6.85708	7.68803	GR-356_Ctrl_10D_peak_725
chr11	102345881	102346188	308	102346056	23.00	16.49401	7.50209	12.48632	GR-356_Ctrl_10D_peak_726
chr11	102560387	102560819	433	102560560	24.00	23.94887	11.50558	19.68544	GR-356_Ctrl_10D_peak_727
chr11	102760416	102760649	234	102760493	14.00	7.95815	4.73693	4.37816	GR-356_Ctrl_10D_peak_728
chr11	102851167	102851570	404	102851285	15.00	5.86474	3.46995	2.47256	GR-356_Ctrl_10D_peak_729
chr11	103529289	103529725	437	103529506	56.00	68.12180	23.31855	62.98133	GR-356_Ctrl_10D_peak_730
chr11	103609377	103609745	369	103609549	20.00	13.55309	6.63170	9.65682	GR-356_Ctrl_10D_peak_731
chr11	103625424	103625640	217	103625521	14.00	7.87427	4.68881	4.30879	GR-356_Ctrl_10D_peak_732
chr11	104581722	104581977	256	104581851	16.00	15.94465	9.09634	11.95197	GR-356_Ctrl_10D_peak_733
chr11	105244516	105244718	203	105244652	14.00	7.95815	4.73693	4.37816	GR-356_Ctrl_10D_peak_734
chr11	106399100	106399342	243	106399232	16.00	10.08143	5.56920	6.36625	GR-356_Ctrl_10D_peak_735
chr11	107704974	107705356	383	107705196	29.00	28.23959	12.27292	23.85041	GR-356_Ctrl_10D_peak_736
chr11	109547798	109548000	203	109547862	10.00	7.19815	4.99505	3.68718	GR-356_Ctrl_10D_peak_737
chr11	109552348	109552608	261	109552522	19.00	19.07193	10.16463	14.96537	GR-356_Ctrl_10D_peak_738
chr11	110125683	110126072	390	110125837	19.00	15.78879	8.18195	11.80509	GR-356_Ctrl_10D_peak_739
chr11	110185163	110185493	331	110185359	28.00	22.11738	9.15806	17.90403	GR-356_Ctrl_10D_peak_740
chr11	110196154	110196575	422	110196374	47.00	54.04313	19.63667	49.13732	GR-356_Ctrl_10D_peak_741
chr11	111698803	111699101	299	111698974	26.00	24.32971	11.04563	20.04797	GR-356_Ctrl_10D_peak_742
chr11	112157212	112157426	215	112157322	17.00	10.65101	5.68431	6.89792	GR-356_Ctrl_10D_peak_743
chr11	112757449	112757684	236	112757535	12.00	8.75946	5.60474	5.12077	GR-356_Ctrl_10D_peak_744
chr11	113674931	113675464	534	113675123	104.00	120.90105	27.00053	115.08220	GR-356_Ctrl_10D_peak_745
chr11	114160022	114160415	394	114160204	56.00	58.39266	18.00033	53.41202	GR-356_Ctrl_10D_peak_746
chr11	114162767	114163414	648	114162978	106.00	137.09227	33.79008	131.11208	GR-356_Ctrl_10D_peak_747
chr11	114163955	114164350	396	114164068	24.00	21.64832	10.13758	17.45436	GR-356_Ctrl_10D_peak_748
chr11	114167007	114167220	214	114167106	14.00	12.27826	7.34966	8.44848	GR-356_Ctrl_10D_peak_749
chr11	114179263	114179625	363	114179479	20.00	21.35004	11.23666	17.16300	GR-356_Ctrl_10D_peak_750
chr11	114294942	114295405	464	114295241	20.00	9.48921	4.55431	5.80980	GR-356_Ctrl_10D_peak_751
chr11	115226598	115226800	203	115226738	14.00	8.26455	4.91400	4.66776	GR-356_Ctrl_10D_peak_752
chr11	115612541	115612743	203	115612645	11.00	7.27170	4.86604	3.75222	GR-356_Ctrl_10D_peak_753
chr11	118919906	118920137	232	118920019	13.00	8.21603	5.07378	4.62604	GR-356_Ctrl_10D_peak_754
chr11	118920781	118921024	244	118920916	26.00	19.87698	8.52647	15.74164	GR-356_Ctrl_10D_peak_755
chr11	119318760	119319009	250	119318820	14.00	10.21939	6.08255	6.49609	GR-356_Ctrl_10D_peak_756
chr11	119367735	119367948	214	119367875	10.00	8.14243	5.59055	4.55662	GR-356_Ctrl_10D_peak_757
chr11	119470679	119471022	344	119470867	14.00	10.27893	6.11892	6.55357	GR-356_Ctrl_10D_peak_758
chr11	120124996	120125280	285	120125144	17.00	17.26211	9.63142	13.22009	GR-356_Ctrl_10D_peak_759
chr11	121829256	121829506	251	121829381	14.00	7.87427	4.68881	4.30879	GR-356_Ctrl_10D_peak_760
chr11	122140594	122140860	267	122140753	19.00	16.52311	8.62268	12.51361	GR-356_Ctrl_10D_peak_761
chr11	122162124	122162415	292	122162262	33.00	16.67054	5.61480	12.65471	GR-356_Ctrl_10D_peak_762
chr11	122197136	122197432	297	122197299	15.00	12.00404	6.94202	8.18586	GR-356_Ctrl_10D_peak_763
chr11	122748860	122749366	507	122749060	47.00	54.04313	19.63667	49.13732	GR-356_Ctrl_10D_peak_764
chr11	122784614	122784970	357	122784801	39.00	27.13477	8.67488	22.77430	GR-356_Ctrl_10D_peak_765
chr11	123122358	123122629	272	123122504	22.00	18.30915	8.80322	14.23111	GR-356_Ctrl_10D_peak_766
chr11	123973792	123974237	446	123974047	34.00	38.08564	16.10782	33.47093	GR-356_Ctrl_10D_peak_767
chr11	124801127	124801504	378	124801315	50.00	67.66396	26.11438	62.53341	GR-356_Ctrl_10D_peak_768
chr11	125079197	125079543	347	125079361	19.00	14.90097	7.65498	10.94791	GR-356_Ctrl_10D_peak_769
chr11	125082980	125083426	447	125083182	32.00	32.07315	13.38160	27.59659	GR-356_Ctrl_10D_peak_770
chr11	126373611	126373907	297	126373709	22.00	13.01516	5.91440	9.14773	GR-356_Ctrl_10D_peak_771
chr11	126375793	126375995	203	126375891	14.00	10.98091	6.54981	7.21426	GR-356_Ctrl_10D_peak_772
chr11	126394711	126395171	461	126394893	36.00	37.61062	15.00362	33.01239	GR-356_Ctrl_10D_peak_773
chr11	128026751	128026994	244	128026853	19.00	12.44848	6.25174	8.60573	GR-356_Ctrl_10D_peak_774
chr11	128135521	128135910	390	128135761	39.00	42.13581	16.36389	37.44027	GR-356_Ctrl_10D_peak_775
chr11	128207883	128208932	1050	128208156	51.00	49.65142	15.54227	44.82020	GR-356_Ctrl_10D_peak_776
chr11	128228875	128229221	347	128229032	27.00	23.35164	10.14755	19.09668	GR-356_Ctrl_10D_peak_777
chr11	128467523	128467728	206	128467625	13.00	9.20658	5.67704	5.54393	GR-356_Ctrl_10D_peak_778
chr11	129639410	129639670	261	129639532	12.00	8.22331	5.27154	4.62849	GR-356_Ctrl_10D_peak_779
chr11	130103377	130103783	407	130103538	20.00	19.65222	10.21613	15.53001	GR-356_Ctrl_10D_peak_780
chr11	130383570	130384179	610	130383748	28.00	18.79646	7.45729	14.69530	GR-356_Ctrl_10D_peak_781
chr11	130430081	130430283	203	130430233	12.00	9.63177	6.14885	5.94279	GR-356_Ctrl_10D_peak_782
chr11	130478118	130478838	721	130478637	29.00	23.25980	9.47386	19.00767	GR-356_Ctrl_10D_peak_783
chr11	130606817	130607019	203	130606998	8.00	6.06494	4.57408	2.65868	GR-356_Ctrl_10D_peak_784
chr11	130772579	130772988	410	130772773	37.00	32.87502	12.00022	28.37696	GR-356_Ctrl_10D_peak_785
chr11	130798228	130798706	479	130798523	33.00	32.09345	13.01346	27.61553	GR-356_Ctrl_10D_peak_786
chr12	1350256	1350560	305	1350380	12.00	9.36569	5.98290	5.68975	GR-356_Ctrl_10D_peak_787
chr12	1430072	1430288	217	1430208	11.00	5.51391	3.78954	2.15920	GR-356_Ctrl_10D_peak_788
chr12	1474127	1474543	417	1474349	26.00	16.80506	6.94299	12.78369	GR-356_Ctrl_10D_peak_789
chr12	1760757	1761005	249	1760858	15.00	11.35453	6.54556	7.56438	GR-356_Ctrl_10D_peak_790
chr12	2180438	2180727	290	2180599	9.00	6.57982	4.76292	3.10897	GR-356_Ctrl_10D_peak_791
chr12	2264985	2265662	678	2265197	31.00	30.91800	13.09111	26.46207	GR-356_Ctrl_10D_peak_792
chr12	2267261	2267521	261	2267461	11.00	7.86796	5.23985	4.30415	GR-356_Ctrl_10D_peak_793
chr12	2302270	2302476	207	2302303	10.00	7.88452	5.42875	4.31631	GR-356_Ctrl_10D_peak_794
chr12	3641506	3642029	524	3641742	31.00	25.58671	10.10545	21.27127	GR-356_Ctrl_10D_peak_795
chr12	4824389	4824697	309	4824515	18.00	14.53192	7.70456	10.60465	GR-356_Ctrl_10D_peak_796
chr12	5096561	5096902	342	5096788	25.00	27.88875	13.51614	23.51767	GR-356_Ctrl_10D_peak_797
chr12	6376120	6376504	385	6376309	58.00	70.96481	23.92469	65.78624	GR-356_Ctrl_10D_peak_798
chr12	10165416	10165634	219	10165520	10.00	6.41677	4.50007	2.96268	GR-356_Ctrl_10D_peak_799
chr12	10301277	10301479	203	10301371	10.00	8.61749	5.88587	4.99608	GR-356_Ctrl_10D_peak_800
chr12	10422165	10422562	398	10422450	18.00	13.80571	7.27223	9.90112	GR-356_Ctrl_10D_peak_801
chr12	10437746	10437959	214	10437777	14.00	10.30761	6.13646	6.57570	GR-356_Ctrl_10D_peak_802
chr12	10634587	10634870	284	10634715	10.00	6.41677	4.50007	2.96268	GR-356_Ctrl_10D_peak_803
chr12	12819920	12820310	391	12820166	13.00	7.11342	4.42113	3.60941	GR-356_Ctrl_10D_peak_804
chr12	12823294	12823635	342	12823395	25.00	22.68672	10.41920	18.46102	GR-356_Ctrl_10D_peak_805
chr12	12883474	12883870	397	12883762	11.00	8.82037	5.83779	5.18096	GR-356_Ctrl_10D_peak_806
chr12	13098528	13098792	265	13098689	17.00	12.73252	6.88948	8.87421	GR-356_Ctrl_10D_peak_807
chr12	13102131	13102459	329	13102366	24.00	19.79094	9.06031	15.66491	GR-356_Ctrl_10D_peak_808
chr12	13125173	13125535	363	13125326	27.00	24.34837	10.71697	20.06435	GR-356_Ctrl_10D_peak_809
chr12	13135716	13136221	506	13136024	64.00	56.21424	14.09668	51.27357	GR-356_Ctrl_10D_peak_810
chr12	13780504	13780794	291	13780659	12.00	8.29870	5.31827	4.69290	GR-356_Ctrl_10D_peak_811
chr12	15629112	15629479	368	15629279	53.00	60.84317	20.66844	55.82151	GR-356_Ctrl_10D_peak_812
chr12	15662802	15663004	203	15662880	17.00	9.68928	5.15416	5.99608	GR-356_Ctrl_10D_peak_813
chr12	15978577	15978779	203	15978702	16.00	9.72846	5.36852	6.02673	GR-356_Ctrl_10D_peak_814
chr12	22275851	22276053	203	22275969	8.00	5.61633	4.28662	2.24282	GR-356_Ctrl_10D_peak_815
chr12	22477326	22477568	243	22477435	16.00	12.32642	6.89355	8.49305	GR-356_Ctrl_10D_peak_816
chr12	26697299	26697501	203	26697394	13.00	10.10612	6.23286	6.38965	GR-356_Ctrl_10D_peak_817
chr12	27574041	27574264	224	27574166	21.00	10.27760	4.77118	6.55237	GR-356_Ctrl_10D_peak_818
chr12	27982027	27982268	242	27982110	18.00	14.64586	7.77285	10.70526	GR-356_Ctrl_10D_peak_819
chr12	29741651	29741889	239	29741757	15.00	14.57073	8.51225	10.63709	GR-356_Ctrl_10D_peak_820
chr12	29807186	29807465	280	29807293	13.00	12.14649	7.49111	8.31795	GR-356_Ctrl_10D_peak_821
chr12	30795283	30795527	245	30795434	16.00	7.89826	4.37151	4.32601	GR-356_Ctrl_10D_peak_822
chr12	31731838	31732197	360	31732014	39.00	40.29269	15.30995	35.63759	GR-356_Ctrl_10D_peak_823
chr12	32051589	32051899	311	32051715	27.00	23.35164	10.14755	19.09668	GR-356_Ctrl_10D_peak_824
chr12	32437079	32437402	324	32437246	28.00	16.28809	6.28929	12.28464	GR-356_Ctrl_10D_peak_825
chr12	32454018	32454337	320	32454196	40.00	36.67540	12.94760	32.08898	GR-356_Ctrl_10D_peak_826
chr12	32486281	32486550	270	32486406	23.00	13.93699	6.17155	10.02573	GR-356_Ctrl_10D_peak_827
chr12	32548773	32549066	294	32548830	19.00	15.78879	8.18195	11.80509	GR-356_Ctrl_10D_peak_828
chr12	32917091	32917552	462	32917354	47.00	60.41546	23.35116	55.40118	GR-356_Ctrl_10D_peak_829
chr12	38056729	38057144	416	38056962	11.00	9.54122	6.28613	5.85766	GR-356_Ctrl_10D_peak_830
chr12	42757047	42757280	234	42757185	16.00	11.68258	6.50673	7.87434	GR-356_Ctrl_10D_peak_831
chr12	42961352	42961754	403	42961562	32.00	30.76890	12.63071	26.31952	GR-356_Ctrl_10D_peak_832
chr12	43742141	43742377	237	43742293	18.00	11.59671	6.00011	7.79238	GR-356_Ctrl_10D_peak_833
chr12	45290203	45290560	358	45290502	10.00	8.61749	5.88587	4.99608	GR-356_Ctrl_10D_peak_834
chr12	46386490	46386906	417	46386740	17.00	8.69704	4.62866	5.06540	GR-356_Ctrl_10D_peak_835
chr12	46389121	46389586	466	46389384	40.00	42.99316	16.43027	38.28294	GR-356_Ctrl_10D_peak_836
chr12	46445551	46445811	261	46445712	20.00	16.01727	8.03773	12.02110	GR-356_Ctrl_10D_peak_837
chr12	46549793	46550097	305	46549962	42.00	38.99736	13.44125	34.36911	GR-356_Ctrl_10D_peak_838
chr12	46556213	46556488	276	46556324	12.00	8.27419	5.30307	4.67731	GR-356_Ctrl_10D_peak_839
chr12	46774033	46774563	531	46774242	79.00	99.98230	28.99300	94.41714	GR-356_Ctrl_10D_peak_840
chr12	46786739	46787165	427	46786920	36.00	31.63035	11.68442	27.16101	GR-356_Ctrl_10D_peak_841
chr12	46886792	46887086	295	46886913	9.00	6.32821	4.60223	2.89837	GR-356_Ctrl_10D_peak_842
chr12	46915182	46915408	227	46915224	14.00	9.65783	5.74123	5.96542	GR-356_Ctrl_10D_peak_843
chr12	46950076	46950351	276	46950183	14.00	12.36472	7.40284	8.52987	GR-356_Ctrl_10D_peak_844
chr12	47017976	47018179	204	47018110	17.00	13.52504	7.36375	9.63421	GR-356_Ctrl_10D_peak_845
chr12	47820517	47820865	349	47820677	14.00	12.63223	7.56709	8.78020	GR-356_Ctrl_10D_peak_846
chr12	47825061	47825458	398	47825282	18.00	17.63750	9.58498	13.58629	GR-356_Ctrl_10D_peak_847
chr12	50201875	50202368	494	50202128	26.00	14.48959	5.85554	10.56558	GR-356_Ctrl_10D_peak_848
chr12	50390401	50390646	246	50390447	20.00	11.22712	5.40011	7.44680	GR-356_Ctrl_10D_peak_849
chr12	51441670	51441899	230	51441769	15.00	7.12379	4.11437	3.61532	GR-356_Ctrl_10D_peak_850
chr12	51820367	51820598	232	51820473	14.00	12.19309	7.29724	8.36400	GR-356_Ctrl_10D_peak_851
chr12	52075315	52075611	297	52075509	11.00	9.70041	6.38419	6.00564	GR-356_Ctrl_10D_peak_852
chr12	52082233	52082645	413	52082382	16.00	15.85818	9.04427	11.86969	GR-356_Ctrl_10D_peak_853
chr12	52120972	52121174	203	52121110	12.00	8.22331	5.27154	4.62849	GR-356_Ctrl_10D_peak_854
chr12	52147312	52147714	403	52147508	29.00	19.81433	7.71444	15.68581	GR-356_Ctrl_10D_peak_855
chr12	52215623	52215892	270	52215739	21.00	15.67889	7.57082	11.70144	GR-356_Ctrl_10D_peak_856
chr12	52230363	52230649	287	52230494	16.00	9.72846	5.36852	6.02673	GR-356_Ctrl_10D_peak_857
chr12	52231741	52232116	376	52231943	16.00	7.89826	4.37151	4.32601	GR-356_Ctrl_10D_peak_858
chr12	52280291	52280553	263	52280444	24.00	14.87636	6.42870	10.92602	GR-356_Ctrl_10D_peak_859
chr12	52494454	52494889	436	52494639	26.00	29.90888	14.36443	25.47946	GR-356_Ctrl_10D_peak_860
chr12	52496512	52496789	278	52496626	17.00	15.92056	8.81959	11.93070	GR-356_Ctrl_10D_peak_861
chr12	53049615	53049928	314	53049787	19.00	12.56442	6.31590	8.71315	GR-356_Ctrl_10D_peak_862
chr12	53770205	53770628	424	53770403	48.00	55.57390	20.04577	50.64010	GR-356_Ctrl_10D_peak_863
chr12	54421188	54421426	239	54421289	15.00	11.25988	6.48805	7.47609	GR-356_Ctrl_10D_peak_864
chr12	54428753	54429157	405	54428955	25.00	26.58788	12.73941	22.24983	GR-356_Ctrl_10D_peak_865
chr12	55847929	55848295	367	55848115	50.00	66.05376	25.16964	60.94597	GR-356_Ctrl_10D_peak_866
chr12	56581702	56581932	231	56581792	13.00	10.65982	6.57624	6.90344	GR-356_Ctrl_10D_peak_867
chr12	58310712	58311291	580	58310895	54.00	55.55957	17.36874	50.62794	GR-356_Ctrl_10D_peak_868
chr12	58314587	58314945	359	58314833	25.00	24.02659	11.20948	19.75829	GR-356_Ctrl_10D_peak_869
chr12	58367026	58367255	230	58367154	13.00	7.11342	4.42113	3.60941	GR-356_Ctrl_10D_peak_870
chr12	58877313	58877572	260	58877403	14.00	10.30761	6.13646	6.57570	GR-356_Ctrl_10D_peak_871
chr12	62702453	62702802	350	62702756	10.00	6.41677	4.50007	2.96268	GR-356_Ctrl_10D_peak_872
chr12	65495359	65495762	404	65495598	13.00	7.11342	4.42113	3.60941	GR-356_Ctrl_10D_peak_873
chr12	65536926	65537442	517	65537086	27.00	17.79320	7.20014	13.73126	GR-356_Ctrl_10D_peak_874
chr12	65561962	65562238	277	65562090	14.00	10.30761	6.13646	6.57570	GR-356_Ctrl_10D_peak_875
chr12	65631563	65632112	550	65631851	44.00	41.88770	14.21078	37.19566	GR-356_Ctrl_10D_peak_876
chr12	65634791	65635024	234	65634914	17.00	10.65101	5.68431	6.89792	GR-356_Ctrl_10D_peak_877
chr12	65648966	65649628	663	65649252	84.00	118.78229	36.64638	112.98795	GR-356_Ctrl_10D_peak_878
chr12	65656902	65657224	323	65657046	26.00	19.71597	8.43985	15.59237	GR-356_Ctrl_10D_peak_879
chr12	65891880	65892436	557	65892239	23.00	19.48305	9.18597	15.36237	GR-356_Ctrl_10D_peak_880
chr12	65928298	65928537	240	65928436	17.00	13.52504	7.36375	9.63421	GR-356_Ctrl_10D_peak_881
chr12	68497687	68497992	306	68497856	16.00	6.54374	3.68682	3.07554	GR-356_Ctrl_10D_peak_882
chr12	68787455	68787657	203	68787569	8.00	6.44733	4.81571	2.98262	GR-356_Ctrl_10D_peak_883
chr12	68914994	68915268	275	68915130	21.00	22.48929	11.61376	18.26835	GR-356_Ctrl_10D_peak_884
chr12	69689020	69689464	445	69689196	20.00	16.82593	8.51557	12.80157	GR-356_Ctrl_10D_peak_885
chr12	70645835	70646225	391	70646028	21.00	14.56176	6.94749	10.62918	GR-356_Ctrl_10D_peak_886
chr12	75705994	75706419	426	75706193	54.00	72.92241	27.14373	67.71780	GR-356_Ctrl_10D_peak_887
chr12	75825675	75825987	313	75825864	13.00	9.28838	5.72736	5.61672	GR-356_Ctrl_10D_peak_888
chr12	75944568	75944807	240	75944711	14.00	7.95815	4.73693	4.37816	GR-356_Ctrl_10D_peak_889
chr12	75977817	75978242	426	75978111	30.00	23.42224	9.26558	19.16640	GR-356_Ctrl_10D_peak_890
chr12	76020815	76021241	427	76021081	35.00	33.48134	13.04685	28.97126	GR-356_Ctrl_10D_peak_891
chr12	76259742	76260141	400	76259904	31.00	37.57266	17.02451	32.97676	GR-356_Ctrl_10D_peak_892
chr12	76266720	76267193	474	76266953	57.00	69.72572	23.72765	64.56362	GR-356_Ctrl_10D_peak_893
chr12	76275554	76275812	259	76275645	14.00	10.30761	6.13646	6.57570	GR-356_Ctrl_10D_peak_894
chr12	76611648	76611910	263	76611809	28.00	22.11738	9.15806	17.90403	GR-356_Ctrl_10D_peak_895
chr12	77058794	77059082	289	77058925	19.00	10.36255	5.14296	6.62581	GR-356_Ctrl_10D_peak_896
chr12	79547331	79547660	330	79547465	19.00	14.20561	7.24825	10.28829	GR-356_Ctrl_10D_peak_897
chr12	80627721	80628173	453	80627943	44.00	47.42304	17.22370	42.62575	GR-356_Ctrl_10D_peak_898
chr12	88299738	88299940	203	88299836	12.00	7.74386	4.97573	4.18694	GR-356_Ctrl_10D_peak_899
chr12	88308897	88309305	409	88309142	52.00	52.75772	16.73714	47.86882	GR-356_Ctrl_10D_peak_900
chr12	88925957	88926218	262	88926111	16.00	14.88028	8.45103	10.92971	GR-356_Ctrl_10D_peak_901
chr12	89733544	89734106	563	89733864	41.00	44.79081	17.03113	40.04410	GR-356_Ctrl_10D_peak_902
chr12	90106620	90106829	210	90106684	11.00	7.34068	4.90917	3.80450	GR-356_Ctrl_10D_peak_903
chr12	91777686	91777888	203	91777801	13.00	11.70727	7.22288	7.89865	GR-356_Ctrl_10D_peak_904
chr12	91778974	91779210	237	91779084	15.00	14.57073	8.51225	10.63709	GR-356_Ctrl_10D_peak_905
chr12	93090225	93090549	325	93090390	24.00	17.55129	7.81468	13.50081	GR-356_Ctrl_10D_peak_906
chr12	93200349	93200561	213	93200447	17.00	13.52504	7.36375	9.63421	GR-356_Ctrl_10D_peak_907
chr12	93777216	93777497	282	93777341	23.00	16.63569	7.57908	12.62046	GR-356_Ctrl_10D_peak_908
chr12	93809945	93810340	396	93810144	52.00	72.58334	27.97861	67.38122	GR-356_Ctrl_10D_peak_909
chr12	94173020	94173322	303	94173171	15.00	13.19706	7.67425	9.32432	GR-356_Ctrl_10D_peak_910
chr12	94644126	94644341	216	94644281	15.00	11.86155	6.85482	8.05101	GR-356_Ctrl_10D_peak_911
chr12	94644481	94644794	314	94644675	14.00	10.71509	6.38628	6.95831	GR-356_Ctrl_10D_peak_912
chr12	95103221	95103423	203	95103329	12.00	10.78483	6.86268	7.02704	GR-356_Ctrl_10D_peak_913
chr12	95805957	95806338	382	95806127	26.00	22.14883	9.78514	17.93335	GR-356_Ctrl_10D_peak_914
chr12	96196832	96197113	282	96196954	19.00	15.66840	8.11006	11.69225	GR-356_Ctrl_10D_peak_915
chr12	96237697	96237996	300	96237842	24.00	22.73116	10.77835	18.50370	GR-356_Ctrl_10D_peak_916
chr12	98440208	98440438	231	98440315	10.00	8.56295	5.85217	4.94652	GR-356_Ctrl_10D_peak_917
chr12	99455255	99455632	378	99455454	22.00	24.05927	12.23636	19.78887	GR-356_Ctrl_10D_peak_918
chr12	102539805	102540130	326	102539960	17.00	14.77196	8.11967	10.82767	GR-356_Ctrl_10D_peak_919
chr12	103802319	103802666	348	103802455	14.00	11.94500	7.14437	8.12957	GR-356_Ctrl_10D_peak_920
chr12	103851198	103851490	293	103851328	28.00	28.00853	12.50288	23.63149	GR-356_Ctrl_10D_peak_921
chr12	103858998	103859545	548	103859293	35.00	32.29177	12.38862	27.80520	GR-356_Ctrl_10D_peak_922
chr12	104177593	104177812	220	104177721	15.00	7.12379	4.11437	3.61532	GR-356_Ctrl_10D_peak_923
chr12	104219419	104219860	442	104219549	19.00	10.36255	5.14296	6.62581	GR-356_Ctrl_10D_peak_924
chr12	104603655	104603976	322	104603820	22.00	16.76213	7.91495	12.74396	GR-356_Ctrl_10D_peak_925
chr12	105254355	105254563	209	105254459	17.00	10.65101	5.68431	6.89792	GR-356_Ctrl_10D_peak_926
chr12	105485198	105485667	470	105485444	43.00	55.18349	22.19679	50.26078	GR-356_Ctrl_10D_peak_927
chr12	106030709	106031071	363	106030783	9.00	6.85076	4.93522	3.36332	GR-356_Ctrl_10D_peak_928
chr12	107344482	107344720	239	107344656	20.00	16.82593	8.51557	12.80157	GR-356_Ctrl_10D_peak_929
chr12	107349070	107349364	295	107349209	20.00	16.95276	8.59104	12.92164	GR-356_Ctrl_10D_peak_930
chr12	108306141	108306462	322	108306247	33.00	33.64975	13.90931	29.13270	GR-356_Ctrl_10D_peak_931
chr12	108306974	108307409	436	108307196	33.00	38.52033	16.77976	33.90182	GR-356_Ctrl_10D_peak_932
chr12	108630983	108631298	316	108631118	24.00	22.73116	10.77835	18.50370	GR-356_Ctrl_10D_peak_933
chr12	108691775	108692079	305	108691923	34.00	25.10741	9.00018	20.80608	GR-356_Ctrl_10D_peak_934
chr12	108838403	108838660	258	108838513	24.00	16.91158	7.47224	12.88545	GR-356_Ctrl_10D_peak_935
chr12	108975156	108975462	307	108975304	23.00	20.56168	9.81834	16.40304	GR-356_Ctrl_10D_peak_936
chr12	110109305	110109569	265	110109466	12.00	10.44978	6.65661	6.70917	GR-356_Ctrl_10D_peak_937
chr12	110543556	110543924	369	110543730	37.00	43.40502	17.97358	38.68620	GR-356_Ctrl_10D_peak_938
chr12	110545303	110545795	493	110545592	46.00	44.55188	14.84237	39.80764	GR-356_Ctrl_10D_peak_939
chr12	110916610	110916818	209	110916646	13.00	9.28838	5.72736	5.61672	GR-356_Ctrl_10D_peak_940
chr12	110917552	110917942	391	110917743	39.00	35.39782	12.63181	30.83960	GR-356_Ctrl_10D_peak_941
chr12	112018828	112019207	380	112018952	12.00	8.29870	5.31827	4.69290	GR-356_Ctrl_10D_peak_942
chr12	113214924	113215197	274	113215039	16.00	9.72846	5.36852	6.02673	GR-356_Ctrl_10D_peak_943
chr12	114914351	114914681	331	114914491	19.00	10.36255	5.14296	6.62581	GR-356_Ctrl_10D_peak_944
chr12	114916097	114916481	385	114916250	17.00	16.02543	8.88340	12.02762	GR-356_Ctrl_10D_peak_945
chr12	114933484	114933925	442	114933661	29.00	25.80228	10.87238	21.47580	GR-356_Ctrl_10D_peak_946
chr12	116152355	116152557	203	116152429	14.00	10.84639	6.46701	7.08551	GR-356_Ctrl_10D_peak_947
chr12	116426207	116426646	440	116426464	33.00	29.75025	11.70036	25.32212	GR-356_Ctrl_10D_peak_948
chr12	119716582	119716925	344	119716747	28.00	25.60407	11.09972	21.28617	GR-356_Ctrl_10D_peak_949
chr12	120234853	120235119	267	120234999	10.00	6.79972	4.74247	3.31966	GR-356_Ctrl_10D_peak_950
chr12	120237422	120237752	331	120237577	20.00	11.22712	5.40011	7.44680	GR-356_Ctrl_10D_peak_951
chr12	120291606	120291944	339	120291746	14.00	9.65783	5.74123	5.96542	GR-356_Ctrl_10D_peak_952
chr12	121720096	121720426	331	121720250	34.00	38.08564	16.10782	33.47093	GR-356_Ctrl_10D_peak_953
chr12	121942216	121942488	273	121942344	18.00	15.34104	8.19154	11.37763	GR-356_Ctrl_10D_peak_954
chr12	121965278	121965746	469	121965565	23.00	19.48305	9.18597	15.36237	GR-356_Ctrl_10D_peak_955
chr12	122072593	122072953	361	122072788	27.00	26.66585	12.07175	22.32523	GR-356_Ctrl_10D_peak_956
chr12	122679099	122679427	329	122679234	26.00	24.16418	10.94859	19.89068	GR-356_Ctrl_10D_peak_957
chr12	122830842	122831119	278	122831012	13.00	9.78813	6.03587	6.07882	GR-356_Ctrl_10D_peak_958
chr12	122851904	122852198	295	122852038	23.00	20.56168	9.81834	16.40304	GR-356_Ctrl_10D_peak_959
chr12	123090058	123090260	203	123090217	10.00	6.79972	4.74247	3.31966	GR-356_Ctrl_10D_peak_960
chr12	124236708	124236993	286	124236811	18.00	11.59671	6.00011	7.79238	GR-356_Ctrl_10D_peak_961
chr12	124380334	124380586	253	124380483	11.00	7.34068	4.90917	3.80450	GR-356_Ctrl_10D_peak_962
chr12	124509764	124510128	365	124509942	50.00	60.61223	21.98783	55.59426	GR-356_Ctrl_10D_peak_963
chr12	124755328	124755585	258	124755453	12.00	10.87226	6.91621	7.11008	GR-356_Ctrl_10D_peak_964
chr12	124914847	124915110	264	124914986	12.00	6.29799	4.10534	2.87237	GR-356_Ctrl_10D_peak_965
chr12	124917120	124917372	253	124917218	21.00	18.09349	8.97442	14.02531	GR-356_Ctrl_10D_peak_966
chr12	124928196	124928678	483	124928449	83.00	115.79588	35.54131	110.03786	GR-356_Ctrl_10D_peak_967
chr12	127125960	127126359	400	127126108	25.00	25.29535	11.96581	20.99092	GR-356_Ctrl_10D_peak_968
chr12	127241215	127241451	237	127241272	19.00	19.96593	10.70158	15.82610	GR-356_Ctrl_10D_peak_969
chr13	20419592	20420238	647	20419831	47.00	40.20762	12.34310	35.55635	GR-356_Ctrl_10D_peak_970
chr13	20814683	20814886	204	20814771	16.00	7.89826	4.37151	4.32601	GR-356_Ctrl_10D_peak_971
chr13	23376689	23376891	203	23376786	10.00	6.41677	4.50007	2.96268	GR-356_Ctrl_10D_peak_972
chr13	23427278	23427649	372	23427498	16.00	11.09999	6.16101	7.32616	GR-356_Ctrl_10D_peak_973
chr13	23790848	23791050	203	23790909	12.00	8.29870	5.31827	4.69290	GR-356_Ctrl_10D_peak_974
chr13	24512238	24512440	203	24512318	16.00	9.63178	5.31398	5.94279	GR-356_Ctrl_10D_peak_975
chr13	26019954	26020444	491	26020249	35.00	36.43174	14.72750	31.85554	GR-356_Ctrl_10D_peak_976
chr13	26022554	26022938	385	26022740	20.00	16.95276	8.59104	12.92164	GR-356_Ctrl_10D_peak_977
chr13	28719832	28720114	283	28719960	24.00	12.75363	5.42180	8.89377	GR-356_Ctrl_10D_peak_978
chr13	29140269	29140750	482	29140552	55.00	74.65948	27.63725	69.42501	GR-356_Ctrl_10D_peak_979
chr13	29991359	29991561	203	29991447	13.00	9.28838	5.72736	5.61672	GR-356_Ctrl_10D_peak_980
chr13	30002641	30002958	318	30002784	10.00	8.61749	5.88587	4.99608	GR-356_Ctrl_10D_peak_981
chr13	30713150	30713438	289	30713279	17.00	12.73252	6.88948	8.87421	GR-356_Ctrl_10D_peak_982
chr13	30719165	30719490	326	30719331	21.00	18.94946	9.48495	14.84561	GR-356_Ctrl_10D_peak_983
chr13	30743298	30744159	862	30743584	105.00	121.79898	26.95730	115.97567	GR-356_Ctrl_10D_peak_984
chr13	30744347	30744622	276	30744475	14.00	10.78035	6.42639	7.02283	GR-356_Ctrl_10D_peak_985
chr13	31767277	31767515	239	31767419	15.00	14.57073	8.51225	10.63709	GR-356_Ctrl_10D_peak_986
chr13	33235861	33236336	476	33236098	70.00	79.01691	22.42146	73.72186	GR-356_Ctrl_10D_peak_987
chr13	33279894	33280310	417	33280043	32.00	30.76890	12.63071	26.31952	GR-356_Ctrl_10D_peak_988
chr13	34265242	34265609	368	34265441	15.00	13.02369	7.56782	9.15602	GR-356_Ctrl_10D_peak_989
chr13	36163746	36164194	449	36163879	31.00	30.91800	13.09111	26.46207	GR-356_Ctrl_10D_peak_990
chr13	36193363	36193754	392	36193552	15.00	13.37551	7.78372	9.49956	GR-356_Ctrl_10D_peak_991
chr13	39565508	39565941	434	39565658	17.00	10.65101	5.68431	6.89792	GR-356_Ctrl_10D_peak_992
chr13	40221418	40221672	255	40221517	14.00	10.30761	6.13646	6.57570	GR-356_Ctrl_10D_peak_993
chr13	40236186	40236642	457	40236386	36.00	45.76448	19.79792	41.00108	GR-356_Ctrl_10D_peak_994
chr13	41060119	41060358	240	41060258	18.00	13.14795	6.88584	9.27546	GR-356_Ctrl_10D_peak_995
chr13	41610415	41610801	387	41610613	55.00	74.65948	27.63725	69.42501	GR-356_Ctrl_10D_peak_996
chr13	41827900	41828118	219	41828047	12.00	10.78483	6.86268	7.02704	GR-356_Ctrl_10D_peak_997
chr13	42106065	42106356	292	42106178	16.00	13.04442	7.32928	9.17460	GR-356_Ctrl_10D_peak_998
chr13	42110799	42111070	272	42110924	9.00	6.85076	4.93522	3.36332	GR-356_Ctrl_10D_peak_999
chr13	42486575	42487389	815	42487056	26.00	20.46375	8.84521	16.31133	GR-356_Ctrl_10D_peak_1000
chr13	43004916	43005774	859	43005108	31.00	34.56407	15.24133	30.03150	GR-356_Ctrl_10D_peak_1001
chr13	43153542	43153959	418	43153784	19.00	14.90097	7.65498	10.94791	GR-356_Ctrl_10D_peak_1002
chr13	43805131	43805503	373	43805302	24.00	14.87636	6.42870	10.92602	GR-356_Ctrl_10D_peak_1003
chr13	44159609	44159831	223	44159684	21.00	8.83310	4.12509	5.18506	GR-356_Ctrl_10D_peak_1004
chr13	44311034	44311345	312	44311174	32.00	26.77034	10.42124	22.42191	GR-356_Ctrl_10D_peak_1005
chr13	44312946	44313248	303	44313070	23.00	16.63569	7.57908	12.62046	GR-356_Ctrl_10D_peak_1006
chr13	44921853	44922181	329	44922049	32.00	27.49773	10.81081	23.12971	GR-356_Ctrl_10D_peak_1007
chr13	45189539	45189789	251	45189656	17.00	13.52504	7.36375	9.63421	GR-356_Ctrl_10D_peak_1008
chr13	45220096	45220358	263	45220219	15.00	8.83037	5.05272	5.18296	GR-356_Ctrl_10D_peak_1009
chr13	45440585	45440813	229	45440711	15.00	11.35453	6.54556	7.56438	GR-356_Ctrl_10D_peak_1010
chr13	46354729	46355118	390	46355003	18.00	13.80571	7.27223	9.90112	GR-356_Ctrl_10D_peak_1011
chr13	47499296	47499583	288	47499427	30.00	24.41639	9.78965	20.12776	GR-356_Ctrl_10D_peak_1012
chr13	47908180	47908391	212	47908263	8.00	6.44733	4.81571	2.98262	GR-356_Ctrl_10D_peak_1013
chr13	48749796	48750007	212	48749906	12.00	6.91785	4.47367	3.42709	GR-356_Ctrl_10D_peak_1014
chr13	48892423	48892700	278	48892572	19.00	15.66840	8.11006	11.69225	GR-356_Ctrl_10D_peak_1015
chr13	48954033	48954451	419	48954286	28.00	31.05078	14.31215	26.59171	GR-356_Ctrl_10D_peak_1016
chr13	49086820	49087047	228	49086968	17.00	13.41753	7.29906	9.53508	GR-356_Ctrl_10D_peak_1017
chr13	49858224	49858947	724	49858700	60.00	64.14838	19.26351	59.07038	GR-356_Ctrl_10D_peak_1018
chr13	50245243	50245554	312	50245416	14.00	10.30761	6.13646	6.57570	GR-356_Ctrl_10D_peak_1019
chr13	50678451	50678717	267	50678630	13.00	9.28838	5.72736	5.61672	GR-356_Ctrl_10D_peak_1020
chr13	51269024	51269348	325	51269176	14.00	12.54167	7.51153	8.69780	GR-356_Ctrl_10D_peak_1021
chr13	51643104	51643450	347	51643286	23.00	17.86373	8.25908	13.80007	GR-356_Ctrl_10D_peak_1022
chr13	67369874	67370252	379	67370071	33.00	40.03282	17.67496	35.38599	GR-356_Ctrl_10D_peak_1023
chr13	72291357	72291788	432	72291655	18.00	13.80571	7.27223	9.90112	GR-356_Ctrl_10D_peak_1024
chr13	74243716	74243942	227	74243882	16.00	9.72846	5.36852	6.02673	GR-356_Ctrl_10D_peak_1025
chr13	74825672	74826079	408	74825800	17.00	15.04171	8.28402	11.08517	GR-356_Ctrl_10D_peak_1026
chr13	74891677	74891978	302	74891869	30.00	35.37306	16.11540	30.82265	GR-356_Ctrl_10D_peak_1027
chr13	75135153	75135365	213	75135198	11.00	6.07889	4.12954	2.67014	GR-356_Ctrl_10D_peak_1028
chr13	75370030	75370232	203	75370089	14.00	11.55428	6.90335	7.75638	GR-356_Ctrl_10D_peak_1029
chr13	76512683	76513037	355	76512872	46.00	34.73843	10.19298	30.20331	GR-356_Ctrl_10D_peak_1030
chr13	77507897	77508388	492	77508252	31.00	30.91800	13.09111	26.46207	GR-356_Ctrl_10D_peak_1031
chr13	77509375	77509590	216	77509463	12.00	9.30144	5.94281	5.62936	GR-356_Ctrl_10D_peak_1032
chr13	77516425	77516706	282	77516522	20.00	13.43072	6.56433	9.54682	GR-356_Ctrl_10D_peak_1033
chr13	78183768	78184009	242	78183862	15.00	13.55932	7.89636	9.66147	GR-356_Ctrl_10D_peak_1034
chr13	79936550	79936956	407	79936737	20.00	11.94928	5.77093	8.13272	GR-356_Ctrl_10D_peak_1035
chr13	80037624	80038008	385	80037787	36.00	21.40624	6.93765	17.21871	GR-356_Ctrl_10D_peak_1036
chr13	80040557	80040893	337	80040740	14.00	7.95815	4.73693	4.37816	GR-356_Ctrl_10D_peak_1037
chr13	80379349	80379555	207	80379413	13.00	9.28838	5.72736	5.61672	GR-356_Ctrl_10D_peak_1038
chr13	80469796	80470238	443	80470059	47.00	64.14135	25.53676	59.06637	GR-356_Ctrl_10D_peak_1039
chr13	84400766	84401019	254	84400866	15.00	11.35453	6.54556	7.56438	GR-356_Ctrl_10D_peak_1040
chr13	85985749	85985966	218	85985816	17.00	13.41753	7.29906	9.53508	GR-356_Ctrl_10D_peak_1041
chr13	87124005	87124448	444	87124197	68.00	79.72222	23.74485	74.42069	GR-356_Ctrl_10D_peak_1042
chr13	89514479	89515043	565	89514875	28.00	16.28809	6.28929	12.28464	GR-356_Ctrl_10D_peak_1043
chr13	90416642	90416874	233	90416785	24.00	17.69942	7.89488	13.64293	GR-356_Ctrl_10D_peak_1044
chr13	93559805	93560007	203	93559858	10.00	7.88452	5.42875	4.31631	GR-356_Ctrl_10D_peak_1045
chr13	94195774	94196145	372	94195963	28.00	24.56963	10.50996	20.27740	GR-356_Ctrl_10D_peak_1046
chr13	95254274	95254606	333	95254414	22.00	19.20033	9.32657	15.08950	GR-356_Ctrl_10D_peak_1047
chr13	95784911	95785225	315	95785061	28.00	24.56963	10.50996	20.27740	GR-356_Ctrl_10D_peak_1048
chr13	97194500	97194762	263	97194628	22.00	18.30915	8.80322	14.23111	GR-356_Ctrl_10D_peak_1049
chr13	97257934	97258286	353	97258106	31.00	29.33768	12.17962	24.92883	GR-356_Ctrl_10D_peak_1050
chr13	98129406	98129619	214	98129531	11.00	7.76250	5.17361	4.20185	GR-356_Ctrl_10D_peak_1051
chr13	98255805	98256085	281	98255939	14.00	5.21124	3.25308	1.90626	GR-356_Ctrl_10D_peak_1052
chr13	98476522	98476724	203	98476647	16.00	11.68258	6.50673	7.87434	GR-356_Ctrl_10D_peak_1053
chr13	98910208	98910641	434	98910482	21.00	14.56176	6.94749	10.62918	GR-356_Ctrl_10D_peak_1054
chr13	99125106	99125315	210	99125170	17.00	10.54790	5.62657	6.80508	GR-356_Ctrl_10D_peak_1055
chr13	101397737	101397981	245	101397836	18.00	15.34104	8.19154	11.37763	GR-356_Ctrl_10D_peak_1056
chr13	101450453	101450721	269	101450569	20.00	11.22712	5.40011	7.44680	GR-356_Ctrl_10D_peak_1057
chr13	104315717	104315925	209	104315837	13.00	10.44517	6.44313	6.70492	GR-356_Ctrl_10D_peak_1058
chr13	106151240	106151897	658	106151495	25.00	23.05716	10.63653	18.81376	GR-356_Ctrl_10D_peak_1059
chr13	106284486	106284702	217	106284558	11.00	9.76027	6.42095	6.05470	GR-356_Ctrl_10D_peak_1060
chr13	108957452	108957704	253	108957560	14.00	7.95815	4.73693	4.37816	GR-356_Ctrl_10D_peak_1061
chr13	109147201	109147644	444	109147387	30.00	29.38058	12.57060	24.96702	GR-356_Ctrl_10D_peak_1062
chr13	109243315	109244112	798	109243805	70.00	79.01691	22.42146	73.72186	GR-356_Ctrl_10D_peak_1063
chr13	109252034	109252264	231	109252171	15.00	10.65720	6.12398	6.90103	GR-356_Ctrl_10D_peak_1064
chr13	109256912	109257415	504	109257189	59.00	71.09618	23.49222	65.91570	GR-356_Ctrl_10D_peak_1065
chr13	109264999	109265397	399	109265195	25.00	23.05716	10.63653	18.81376	GR-356_Ctrl_10D_peak_1066
chr13	109270732	109270934	203	109270814	13.00	7.11342	4.42113	3.60941	GR-356_Ctrl_10D_peak_1067
chr13	109274380	109274700	321	109274535	28.00	16.28809	6.28929	12.28464	GR-356_Ctrl_10D_peak_1068
chr13	109743849	109744096	248	109743941	11.00	8.95550	5.92227	5.30388	GR-356_Ctrl_10D_peak_1069
chr13	109840157	109840856	700	109840351	24.00	27.07922	13.37698	22.72005	GR-356_Ctrl_10D_peak_1070
chr13	110006359	110006641	283	110006470	22.00	18.30915	8.80322	14.23111	GR-356_Ctrl_10D_peak_1071
chr13	110012111	110012722	612	110012390	70.00	87.88428	27.17517	82.47026	GR-356_Ctrl_10D_peak_1072
chr13	110014918	110015382	465	110015076	19.00	10.36255	5.14296	6.62581	GR-356_Ctrl_10D_peak_1073
chr13	110094735	110095039	305	110094882	25.00	18.78006	8.21068	14.68246	GR-356_Ctrl_10D_peak_1074
chr13	110347682	110347962	281	110347870	14.00	7.95815	4.73693	4.37816	GR-356_Ctrl_10D_peak_1075
chr13	110445296	110445584	289	110445458	32.00	22.95109	8.48588	18.71434	GR-356_Ctrl_10D_peak_1076
chr13	110448375	110448589	215	110448456	22.00	11.08498	4.98806	7.31317	GR-356_Ctrl_10D_peak_1077
chr13	110481192	110481398	207	110481241	11.00	7.34068	4.90917	3.80450	GR-356_Ctrl_10D_peak_1078
chr13	110546940	110547265	326	110547098	18.00	11.59671	6.00011	7.79238	GR-356_Ctrl_10D_peak_1079
chr13	113784992	113785432	441	113785168	25.00	15.83259	6.68585	11.84545	GR-356_Ctrl_10D_peak_1080
chr13	113821092	113821558	467	113821419	14.00	10.30761	6.13646	6.57570	GR-356_Ctrl_10D_peak_1081
chr13	113849924	113850211	288	113850014	16.00	12.42749	6.95465	8.58616	GR-356_Ctrl_10D_peak_1082
chr13	113897089	113897584	496	113897338	39.00	24.27275	7.50016	19.99525	GR-356_Ctrl_10D_peak_1083
chr13	113927868	113928173	306	113927946	12.00	6.29799	4.10534	2.87237	GR-356_Ctrl_10D_peak_1084
chr14	21668418	21668788	371	21668609	46.00	44.55188	14.84237	39.80764	GR-356_Ctrl_10D_peak_1085
chr14	22188395	22188628	234	22188455	13.00	9.28838	5.72736	5.61672	GR-356_Ctrl_10D_peak_1086
chr14	22614194	22614558	365	22614378	25.00	15.83259	6.68585	11.84545	GR-356_Ctrl_10D_peak_1087
chr14	25006994	25007402	409	25007194	21.00	18.00353	8.92107	13.93598	GR-356_Ctrl_10D_peak_1088
chr14	26775864	26776083	220	26775944	12.00	9.36569	5.98290	5.68975	GR-356_Ctrl_10D_peak_1089
chr14	28382730	28383178	449	28382984	46.00	59.32006	23.19555	54.32418	GR-356_Ctrl_10D_peak_1090
chr14	28652833	28653045	213	28652962	13.00	7.11342	4.42113	3.60941	GR-356_Ctrl_10D_peak_1091
chr14	28656871	28657109	239	28656994	10.00	7.88452	5.42875	4.31631	GR-356_Ctrl_10D_peak_1092
chr14	28671457	28671870	414	28671688	46.00	38.98653	12.08595	34.35892	GR-356_Ctrl_10D_peak_1093
chr14	28676568	28676878	311	28676698	19.00	12.56442	6.31590	8.71315	GR-356_Ctrl_10D_peak_1094
chr14	31880952	31881300	349	31881111	32.00	32.07315	13.38160	27.59659	GR-356_Ctrl_10D_peak_1095
chr14	31881400	31881602	203	31881562	12.00	6.29799	4.10534	2.87237	GR-356_Ctrl_10D_peak_1096
chr14	33567818	33568020	203	33567962	17.00	12.73252	6.88948	8.87421	GR-356_Ctrl_10D_peak_1097
chr14	34496930	34497149	220	34497114	15.00	8.83037	5.05272	5.18296	GR-356_Ctrl_10D_peak_1098
chr14	34546542	34547141	600	34546982	10.00	7.88452	5.42875	4.31631	GR-356_Ctrl_10D_peak_1099
chr14	34555893	34556307	415	34556203	12.00	8.22331	5.27154	4.62849	GR-356_Ctrl_10D_peak_1100
chr14	35214000	35214261	262	35214129	19.00	18.12657	9.59282	14.05801	GR-356_Ctrl_10D_peak_1101
chr14	35403739	35404286	548	35404029	104.00	151.21831	42.57783	145.07974	GR-356_Ctrl_10D_peak_1102
chr14	38291697	38291904	208	38291818	14.00	9.65783	5.74123	5.96542	GR-356_Ctrl_10D_peak_1103
chr14	42214989	42215218	230	42215083	13.00	10.44517	6.44313	6.70492	GR-356_Ctrl_10D_peak_1104
chr14	49999139	49999499	361	49999284	29.00	23.25980	9.47386	19.00767	GR-356_Ctrl_10D_peak_1105
chr14	50001610	50001862	253	50001671	17.00	10.54790	5.62657	6.80508	GR-356_Ctrl_10D_peak_1106
chr14	50225432	50225687	256	50225600	21.00	18.00353	8.92107	13.93598	GR-356_Ctrl_10D_peak_1107
chr14	50658215	50658636	422	50658409	20.00	13.55309	6.63170	9.65682	GR-356_Ctrl_10D_peak_1108
chr14	50775504	50775811	308	50775693	26.00	16.80506	6.94299	12.78369	GR-356_Ctrl_10D_peak_1109
chr14	50816519	50816793	275	50816682	20.00	13.55309	6.63170	9.65682	GR-356_Ctrl_10D_peak_1110
chr14	51005302	51005508	207	51005379	13.00	10.58728	6.53126	6.84165	GR-356_Ctrl_10D_peak_1111
chr14	51304966	51305207	242	51305057	11.00	7.34068	4.90917	3.80450	GR-356_Ctrl_10D_peak_1112
chr14	51396262	51396697	436	51396461	21.00	14.56176	6.94749	10.62918	GR-356_Ctrl_10D_peak_1113
chr14	51539585	51540001	417	51539657	17.00	9.68928	5.15416	5.99608	GR-356_Ctrl_10D_peak_1114
chr14	51540424	51540666	243	51540529	16.00	13.04442	7.32928	9.17460	GR-356_Ctrl_10D_peak_1115
chr14	51547159	51547522	364	51547339	39.00	36.28942	13.10401	31.71858	GR-356_Ctrl_10D_peak_1116
chr14	51554474	51554680	207	51554564	22.00	11.08498	4.98806	7.31317	GR-356_Ctrl_10D_peak_1117
chr14	52111770	52112072	303	52111938	13.00	12.14649	7.49111	8.31795	GR-356_Ctrl_10D_peak_1118
chr14	52457903	52458237	335	52458134	24.00	20.67458	9.56872	16.51237	GR-356_Ctrl_10D_peak_1119
chr14	54251989	54252323	335	54252100	26.00	19.71597	8.43985	15.59237	GR-356_Ctrl_10D_peak_1120
chr14	54669771	54670302	532	54670104	31.00	25.58671	10.10545	21.27127	GR-356_Ctrl_10D_peak_1121
chr14	54677329	54677540	212	54677467	15.00	11.93237	6.89814	8.11718	GR-356_Ctrl_10D_peak_1122
chr14	58663816	58664163	348	58664002	22.00	22.44482	11.26948	18.22416	GR-356_Ctrl_10D_peak_1123
chr14	58738237	58738675	439	58738428	27.00	22.43964	9.63559	18.21939	GR-356_Ctrl_10D_peak_1124
chr14	60094342	60094619	278	60094455	17.00	10.65101	5.68431	6.89792	GR-356_Ctrl_10D_peak_1125
chr14	61103724	61103993	270	61103863	16.00	9.63178	5.31398	5.94279	GR-356_Ctrl_10D_peak_1126
chr14	61147998	61148289	292	61148093	15.00	12.93883	7.51570	9.07634	GR-356_Ctrl_10D_peak_1127
chr14	61178838	61179065	228	61178916	10.00	6.35418	4.46053	2.91814	GR-356_Ctrl_10D_peak_1128
chr14	61463115	61463338	224	61463182	17.00	12.11236	6.52343	8.28673	GR-356_Ctrl_10D_peak_1129
chr14	61466055	61466564	510	61466326	109.00	142.19742	34.73747	136.15468	GR-356_Ctrl_10D_peak_1130
chr14	61476811	61477041	231	61476945	13.00	8.21603	5.07378	4.62604	GR-356_Ctrl_10D_peak_1131
chr14	61524450	61524686	237	61524567	15.00	8.83037	5.05272	5.18296	GR-356_Ctrl_10D_peak_1132
chr14	61528650	61528981	332	61528823	11.00	7.27170	4.86604	3.75222	GR-356_Ctrl_10D_peak_1133
chr14	61553740	61554084	345	61553933	35.00	26.20401	9.25733	21.87060	GR-356_Ctrl_10D_peak_1134
chr14	61561832	61562078	247	61562004	19.00	12.56442	6.31590	8.71315	GR-356_Ctrl_10D_peak_1135
chr14	61562838	61563054	217	61562945	20.00	11.22712	5.40011	7.44680	GR-356_Ctrl_10D_peak_1136
chr14	61564622	61565031	410	61564702	20.00	12.90259	6.27668	9.04073	GR-356_Ctrl_10D_peak_1137
chr14	61653449	61653702	254	61653601	17.00	7.24685	3.90370	3.73324	GR-356_Ctrl_10D_peak_1138
chr14	62694176	62694428	253	62694299	17.00	13.52504	7.36375	9.63421	GR-356_Ctrl_10D_peak_1139
chr14	64232434	64232668	235	64232525	13.00	11.19792	6.90931	7.42110	GR-356_Ctrl_10D_peak_1140
chr14	64501818	64502065	248	64501954	13.00	10.58728	6.53126	6.84165	GR-356_Ctrl_10D_peak_1141
chr14	65792228	65792449	222	65792373	15.00	11.35453	6.54556	7.56438	GR-356_Ctrl_10D_peak_1142
chr14	68137859	68138081	223	68137951	13.00	10.04092	6.19244	6.32899	GR-356_Ctrl_10D_peak_1143
chr14	68146757	68146969	213	68146808	16.00	11.68258	6.50673	7.87434	GR-356_Ctrl_10D_peak_1144
chr14	68468651	68468996	346	68468851	14.00	11.04942	6.59201	7.27967	GR-356_Ctrl_10D_peak_1145
chr14	68506056	68506327	272	68506220	19.00	19.86347	10.64032	15.73355	GR-356_Ctrl_10D_peak_1146
chr14	68547551	68548003	453	68547772	93.00	95.17064	20.38597	89.66556	GR-356_Ctrl_10D_peak_1147
chr14	68549034	68549437	404	68549236	41.00	45.88215	17.66110	41.11684	GR-356_Ctrl_10D_peak_1148
chr14	68576566	68576927	362	68576778	30.00	30.73746	13.36515	26.28953	GR-356_Ctrl_10D_peak_1149
chr14	68577836	68578195	360	68578032	21.00	14.56176	6.94749	10.62918	GR-356_Ctrl_10D_peak_1150
chr14	68687901	68688103	203	68687989	11.00	9.38745	6.19104	5.71098	GR-356_Ctrl_10D_peak_1151
chr14	68695342	68695760	419	68695585	20.00	16.95276	8.59104	12.92164	GR-356_Ctrl_10D_peak_1152
chr14	68780025	68780241	217	68780189	13.00	9.28838	5.72736	5.61672	GR-356_Ctrl_10D_peak_1153
chr14	68940132	68940342	211	68940181	12.00	6.29799	4.10534	2.87237	GR-356_Ctrl_10D_peak_1154
chr14	69888013	69888360	348	69888170	25.00	24.02659	11.20948	19.75829	GR-356_Ctrl_10D_peak_1155
chr14	70857146	70857412	267	70857307	21.00	21.22910	10.85749	17.04897	GR-356_Ctrl_10D_peak_1156
chr14	71372275	71372702	428	71372487	29.00	23.25980	9.47386	19.00767	GR-356_Ctrl_10D_peak_1157
chr14	72781700	72782349	650	72782158	16.00	9.72846	5.36852	6.02673	GR-356_Ctrl_10D_peak_1158
chr14	73790010	73790375	366	73790179	25.00	15.83259	6.68585	11.84545	GR-356_Ctrl_10D_peak_1159
chr14	73796030	73796250	221	73796167	18.00	14.64586	7.77285	10.70526	GR-356_Ctrl_10D_peak_1160
chr14	74572014	74572223	210	74572048	18.00	6.76303	3.56258	3.28705	GR-356_Ctrl_10D_peak_1161
chr14	74619652	74620041	390	74619842	28.00	22.11738	9.15806	17.90403	GR-356_Ctrl_10D_peak_1162
chr14	74620648	74620884	237	74620814	17.00	8.69704	4.62866	5.06540	GR-356_Ctrl_10D_peak_1163
chr14	74964119	74964337	219	74964175	12.00	8.29870	5.31827	4.69290	GR-356_Ctrl_10D_peak_1164
chr14	75341072	75341289	218	75341148	12.00	8.29870	5.31827	4.69290	GR-356_Ctrl_10D_peak_1165
chr14	75523997	75524199	203	75524130	14.00	9.65783	5.74123	5.96542	GR-356_Ctrl_10D_peak_1166
chr14	75535820	75536335	516	75536031	117.00	140.80537	30.00907	134.77708	GR-356_Ctrl_10D_peak_1167
chr14	75648387	75648822	436	75648620	28.00	18.79646	7.45729	14.69530	GR-356_Ctrl_10D_peak_1168
chr14	77638808	77639115	308	77638932	17.00	16.02543	8.88340	12.02762	GR-356_Ctrl_10D_peak_1169
chr14	79045382	79045704	323	79045539	41.00	33.02191	10.80021	28.52013	GR-356_Ctrl_10D_peak_1170
chr14	80390939	80391278	340	80391088	30.00	26.03306	10.66797	21.70448	GR-356_Ctrl_10D_peak_1171
chr14	80425738	80426077	340	80425894	27.00	20.98960	8.84227	16.81438	GR-356_Ctrl_10D_peak_1172
chr14	81137312	81137695	384	81137461	16.00	15.94465	9.09634	11.95197	GR-356_Ctrl_10D_peak_1173
chr14	81400794	81401222	429	81400950	52.00	52.42887	16.56712	47.55053	GR-356_Ctrl_10D_peak_1174
chr14	81402208	81402456	249	81402374	13.00	8.68610	5.35848	5.06032	GR-356_Ctrl_10D_peak_1175
chr14	86799389	86799950	562	86799742	36.00	31.63035	11.68442	27.16101	GR-356_Ctrl_10D_peak_1176
chr14	88613535	88613968	434	88613723	35.00	33.48134	13.04685	28.97126	GR-356_Ctrl_10D_peak_1177
chr14	89425898	89426459	562	89426134	70.00	63.88388	15.39791	58.81168	GR-356_Ctrl_10D_peak_1178
chr14	90658666	90658868	203	90658777	10.00	8.56295	5.85217	4.94652	GR-356_Ctrl_10D_peak_1179
chr14	91058049	91058331	283	91058196	18.00	15.96695	8.57076	11.97417	GR-356_Ctrl_10D_peak_1180
chr14	91604533	91604749	217	91604613	18.00	18.50580	10.10830	14.42476	GR-356_Ctrl_10D_peak_1181
chr14	92503936	92504226	291	92504116	13.00	9.28838	5.72736	5.61672	GR-356_Ctrl_10D_peak_1182
chr14	92626132	92626335	204	92626214	16.00	12.42749	6.95465	8.58616	GR-356_Ctrl_10D_peak_1183
chr14	93043368	93043798	431	93043606	40.00	45.14730	17.67649	40.39559	GR-356_Ctrl_10D_peak_1184
chr14	94598949	94599717	769	94599362	123.00	206.99310	61.64278	200.38449	GR-356_Ctrl_10D_peak_1185
chr14	95265481	95265817	337	95265562	27.00	10.56872	4.13124	6.82410	GR-356_Ctrl_10D_peak_1186
chr14	95519802	95520013	212	95519880	13.00	9.28838	5.72736	5.61672	GR-356_Ctrl_10D_peak_1187
chr14	96176957	96177159	203	96177122	8.00	6.17386	4.64328	2.76164	GR-356_Ctrl_10D_peak_1188
chr14	96204837	96205039	203	96204955	13.00	9.78813	6.03587	6.07882	GR-356_Ctrl_10D_peak_1189
chr14	100031594	100031827	234	100031709	14.00	9.65783	5.74123	5.96542	GR-356_Ctrl_10D_peak_1190
chr14	100032102	100032343	242	100032236	21.00	18.00353	8.92107	13.93598	GR-356_Ctrl_10D_peak_1191
chr14	100692991	100693364	374	100693343	9.00	5.52982	4.09097	2.16270	GR-356_Ctrl_10D_peak_1192
chr14	102279671	102280356	686	102280095	38.00	39.65466	15.35810	35.00983	GR-356_Ctrl_10D_peak_1193
chr14	102280584	102280978	395	102280807	19.00	12.56442	6.31590	8.71315	GR-356_Ctrl_10D_peak_1194
chr14	104973371	104973581	211	104973517	13.00	8.21603	5.07378	4.62604	GR-356_Ctrl_10D_peak_1195
chr15	21364897	21365160	264	21364989	14.00	10.30761	6.13646	6.57570	GR-356_Ctrl_10D_peak_1196
chr15	29854433	29854745	313	29854571	15.00	11.35453	6.54556	7.56438	GR-356_Ctrl_10D_peak_1197
chr15	29934207	29934626	420	29934438	22.00	13.01516	5.91440	9.14773	GR-356_Ctrl_10D_peak_1198
chr15	30065078	30065684	607	30065259	23.00	16.63569	7.57908	12.62046	GR-356_Ctrl_10D_peak_1199
chr15	30386265	30386522	258	30386412	16.00	15.74214	8.97427	11.76398	GR-356_Ctrl_10D_peak_1200
chr15	30579670	30579910	241	30579762	12.00	9.36569	5.98290	5.68975	GR-356_Ctrl_10D_peak_1201
chr15	31365701	31366147	447	31365947	66.00	95.50279	33.79966	89.99542	GR-356_Ctrl_10D_peak_1202
chr15	31410543	31410797	255	31410610	16.00	12.42749	6.95465	8.58616	GR-356_Ctrl_10D_peak_1203
chr15	32427595	32427814	220	32427666	16.00	11.68258	6.50673	7.87434	GR-356_Ctrl_10D_peak_1204
chr15	32774029	32774318	290	32774177	22.00	14.87042	6.87446	10.92301	GR-356_Ctrl_10D_peak_1205
chr15	32824841	32825124	284	32824987	16.00	11.68258	6.50673	7.87434	GR-356_Ctrl_10D_peak_1206
chr15	32850119	32850718	600	32850349	39.00	42.13581	16.36389	37.44027	GR-356_Ctrl_10D_peak_1207
chr15	33985245	33985535	291	33985406	13.00	8.21603	5.07378	4.62604	GR-356_Ctrl_10D_peak_1208
chr15	34682704	34682936	233	34682825	14.00	10.84639	6.46701	7.08551	GR-356_Ctrl_10D_peak_1209
chr15	35308777	35309116	340	35308922	34.00	40.92316	17.78810	36.25075	GR-356_Ctrl_10D_peak_1210
chr15	36428337	36428649	313	36428528	19.00	8.72066	4.33744	5.08718	GR-356_Ctrl_10D_peak_1211
chr15	38398055	38398469	415	38398286	73.00	83.60001	23.36884	78.24733	GR-356_Ctrl_10D_peak_1212
chr15	38884106	38884340	235	38884143	10.00	6.48236	4.54153	3.01698	GR-356_Ctrl_10D_peak_1213
chr15	38894148	38894819	672	38894313	14.00	10.78035	6.42639	7.02283	GR-356_Ctrl_10D_peak_1214
chr15	38996284	38996530	247	38996376	17.00	10.54790	5.62657	6.80508	GR-356_Ctrl_10D_peak_1215
chr15	39173145	39173496	352	39173290	18.00	11.59671	6.00011	7.79238	GR-356_Ctrl_10D_peak_1216
chr15	39188988	39189258	271	39189075	28.00	16.28809	6.28929	12.28464	GR-356_Ctrl_10D_peak_1217
chr15	39191890	39192147	258	39191969	14.00	9.98763	5.94126	6.27602	GR-356_Ctrl_10D_peak_1218
chr15	39195989	39196532	544	39196291	40.00	31.85864	10.54307	27.38524	GR-356_Ctrl_10D_peak_1219
chr15	39202754	39202971	218	39202839	15.00	11.35453	6.54556	7.56438	GR-356_Ctrl_10D_peak_1220
chr15	39213310	39213725	416	39213507	22.00	13.01516	5.91440	9.14773	GR-356_Ctrl_10D_peak_1221
chr15	39232572	39232864	293	39232732	23.00	20.56168	9.81834	16.40304	GR-356_Ctrl_10D_peak_1222
chr15	39283685	39284005	321	39283837	32.00	26.77034	10.42124	22.42191	GR-356_Ctrl_10D_peak_1223
chr15	39362894	39363283	390	39363089	18.00	16.15616	8.68564	12.15660	GR-356_Ctrl_10D_peak_1224
chr15	39404943	39405204	262	39405094	19.00	12.56442	6.31590	8.71315	GR-356_Ctrl_10D_peak_1225
chr15	39657777	39658001	225	39657926	11.00	8.31799	5.52268	4.70885	GR-356_Ctrl_10D_peak_1226
chr15	39828748	39829033	286	39828882	19.00	15.78879	8.18195	11.80509	GR-356_Ctrl_10D_peak_1227
chr15	40498293	40498566	274	40498436	16.00	14.58405	8.27020	10.65006	GR-356_Ctrl_10D_peak_1228
chr15	40787466	40787766	301	40787635	19.00	15.78879	8.18195	11.80509	GR-356_Ctrl_10D_peak_1229
chr15	40982971	40983173	203	40983123	10.00	7.46976	5.16705	3.92749	GR-356_Ctrl_10D_peak_1230
chr15	43249617	43249827	211	43249744	17.00	12.73252	6.88948	8.87421	GR-356_Ctrl_10D_peak_1231
chr15	48493704	48494049	346	48493942	18.00	11.59671	6.00011	7.79238	GR-356_Ctrl_10D_peak_1232
chr15	48565880	48566180	301	48566031	41.00	40.19159	14.45338	35.54292	GR-356_Ctrl_10D_peak_1233
chr15	48566638	48567104	467	48566803	29.00	28.23959	12.27292	23.85041	GR-356_Ctrl_10D_peak_1234
chr15	48592296	48592756	461	48592497	50.00	49.98831	16.10555	45.14877	GR-356_Ctrl_10D_peak_1235
chr15	48680862	48681200	339	48681056	19.00	12.56442	6.31590	8.71315	GR-356_Ctrl_10D_peak_1236
chr15	49627439	49627825	387	49627608	19.00	10.36255	5.14296	6.62581	GR-356_Ctrl_10D_peak_1237
chr15	50134763	50135007	245	50134877	15.00	10.65720	6.12398	6.90103	GR-356_Ctrl_10D_peak_1238
chr15	50137336	50137597	262	50137428	24.00	15.75474	6.87015	11.77623	GR-356_Ctrl_10D_peak_1239
chr15	51108877	51109110	234	51108987	13.00	5.65348	3.60007	2.27384	GR-356_Ctrl_10D_peak_1240
chr15	51121110	51121466	357	51121312	27.00	20.98960	8.84227	16.81438	GR-356_Ctrl_10D_peak_1241
chr15	51132783	51133042	260	51132901	24.00	17.69942	7.89488	13.64293	GR-356_Ctrl_10D_peak_1242
chr15	51424899	51425128	230	51425016	15.00	14.65187	8.56126	10.70843	GR-356_Ctrl_10D_peak_1243
chr15	51759544	51759746	203	51759657	10.00	5.95660	4.21024	2.55349	GR-356_Ctrl_10D_peak_1244
chr15	52076896	52077200	305	52077056	27.00	25.44601	11.35409	21.13571	GR-356_Ctrl_10D_peak_1245
chr15	55899647	55899849	203	55899728	12.00	8.99264	5.75012	5.34066	GR-356_Ctrl_10D_peak_1246
chr15	55907835	55908109	275	55908009	25.00	20.11907	8.94733	15.97394	GR-356_Ctrl_10D_peak_1247
chr15	55909291	55909642	352	55909482	23.00	10.30918	4.50010	6.57656	GR-356_Ctrl_10D_peak_1248
chr15	55915890	55916289	400	55916090	34.00	35.03465	14.31841	30.48792	GR-356_Ctrl_10D_peak_1249
chr15	58469871	58470302	432	58470050	31.00	25.58671	10.10545	21.27127	GR-356_Ctrl_10D_peak_1250
chr15	58546431	58546675	245	58546539	12.00	8.70295	5.56954	5.07114	GR-356_Ctrl_10D_peak_1251
chr15	58547381	58547611	231	58547459	18.00	9.51884	4.88581	5.83557	GR-356_Ctrl_10D_peak_1252
chr15	59296170	59296556	387	59296362	31.00	21.89208	8.22873	17.68758	GR-356_Ctrl_10D_peak_1253
chr15	59367063	59367298	236	59367173	11.00	7.34068	4.90917	3.80450	GR-356_Ctrl_10D_peak_1254
chr15	59879464	59879858	395	59879722	19.00	12.56442	6.31590	8.71315	GR-356_Ctrl_10D_peak_1255
chr15	60371299	60371603	305	60371453	26.00	24.16418	10.94859	19.89068	GR-356_Ctrl_10D_peak_1256
chr15	60372900	60373157	258	60372971	13.00	10.44517	6.44313	6.70492	GR-356_Ctrl_10D_peak_1257
chr15	60374639	60375008	370	60374830	28.00	22.11738	9.15806	17.90403	GR-356_Ctrl_10D_peak_1258
chr15	60379617	60380071	455	60379973	16.00	11.09999	6.16101	7.32616	GR-356_Ctrl_10D_peak_1259
chr15	60400131	60400383	253	60400157	15.00	8.83037	5.05272	5.18296	GR-356_Ctrl_10D_peak_1260
chr15	60402363	60402722	360	60402533	34.00	25.10741	9.00018	20.80608	GR-356_Ctrl_10D_peak_1261
chr15	60421506	60421909	404	60421696	45.00	37.77456	11.82880	33.17066	GR-356_Ctrl_10D_peak_1262
chr15	61050060	61050394	335	61050222	24.00	27.07922	13.37698	22.72005	GR-356_Ctrl_10D_peak_1263
chr15	62112995	62113288	294	62113128	23.00	23.80840	11.75945	19.54790	GR-356_Ctrl_10D_peak_1264
chr15	62404803	62405029	227	62404871	15.00	13.02369	7.56782	9.15602	GR-356_Ctrl_10D_peak_1265
chr15	62469934	62470270	337	62470086	33.00	27.76071	10.62796	23.39021	GR-356_Ctrl_10D_peak_1266
chr15	62472960	62473205	246	62473093	11.00	8.82037	5.83779	5.18096	GR-356_Ctrl_10D_peak_1267
chr15	62606278	62606596	319	62606457	16.00	11.68258	6.50673	7.87434	GR-356_Ctrl_10D_peak_1268
chr15	62899032	62899260	229	62899210	17.00	10.65101	5.68431	6.89792	GR-356_Ctrl_10D_peak_1269
chr15	62928497	62928732	236	62928653	24.00	14.87636	6.42870	10.92602	GR-356_Ctrl_10D_peak_1270
chr15	63097140	63097347	208	63097210	19.00	8.72066	4.33744	5.08718	GR-356_Ctrl_10D_peak_1271
chr15	63107936	63108348	413	63108158	21.00	10.27760	4.77118	6.55237	GR-356_Ctrl_10D_peak_1272
chr15	63236402	63236771	370	63236580	33.00	27.96687	10.73704	23.59138	GR-356_Ctrl_10D_peak_1273
chr15	63951171	63951375	205	63951218	11.00	8.31799	5.52268	4.70885	GR-356_Ctrl_10D_peak_1274
chr15	64444550	64444752	203	64444686	10.00	6.35418	4.46053	2.91814	GR-356_Ctrl_10D_peak_1275
chr15	64897378	64897729	352	64897546	29.00	19.81433	7.71444	15.68581	GR-356_Ctrl_10D_peak_1276
chr15	66723798	66724138	341	66723993	27.00	20.98960	8.84227	16.81438	GR-356_Ctrl_10D_peak_1277
chr15	67013706	67014166	461	67013900	52.00	65.63212	23.90791	60.52889	GR-356_Ctrl_10D_peak_1278
chr15	67049628	67049908	281	67049783	15.00	9.61549	5.50605	5.92870	GR-356_Ctrl_10D_peak_1279
chr15	67106947	67107220	274	67107073	20.00	18.42226	9.47294	14.34271	GR-356_Ctrl_10D_peak_1280
chr15	67884656	67884997	342	67884816	29.00	26.87443	11.48246	22.52304	GR-356_Ctrl_10D_peak_1281
chr15	67943929	67944315	387	67944116	26.00	27.38429	12.85987	23.01750	GR-356_Ctrl_10D_peak_1282
chr15	67954771	67955116	346	67954924	23.00	25.61965	12.84190	21.29597	GR-356_Ctrl_10D_peak_1283
chr15	69305413	69305710	298	69305609	14.00	9.65783	5.74123	5.96542	GR-356_Ctrl_10D_peak_1284
chr15	69760942	69761144	203	69761038	14.00	10.30761	6.13646	6.57570	GR-356_Ctrl_10D_peak_1285
chr15	70271441	70272052	612	70271608	28.00	18.79646	7.45729	14.69530	GR-356_Ctrl_10D_peak_1286
chr15	70475070	70475360	291	70475190	19.00	14.20561	7.24825	10.28829	GR-356_Ctrl_10D_peak_1287
chr15	70475783	70476138	356	70476023	21.00	14.56176	6.94749	10.62918	GR-356_Ctrl_10D_peak_1288
chr15	70486738	70487251	514	70487102	19.00	15.66840	8.11006	11.69225	GR-356_Ctrl_10D_peak_1289
chr15	71044050	71044507	458	71044187	27.00	17.79320	7.20014	13.73126	GR-356_Ctrl_10D_peak_1290
chr15	71279684	71279943	260	71279850	22.00	15.58957	7.26329	11.61718	GR-356_Ctrl_10D_peak_1291
chr15	71295446	71295839	394	71295617	22.00	19.34005	9.40924	15.22368	GR-356_Ctrl_10D_peak_1292
chr15	71295931	71296319	389	71296081	20.00	18.73982	9.66469	14.64792	GR-356_Ctrl_10D_peak_1293
chr15	71753055	71753337	283	71753164	19.00	12.98741	6.55200	9.12393	GR-356_Ctrl_10D_peak_1294
chr15	73941783	73942161	379	73941966	40.00	45.14730	17.67649	40.39559	GR-356_Ctrl_10D_peak_1295
chr15	73951342	73951571	230	73951445	20.00	13.55309	6.63170	9.65682	GR-356_Ctrl_10D_peak_1296
chr15	73982634	73983025	392	73982834	33.00	25.25372	9.34341	20.95084	GR-356_Ctrl_10D_peak_1297
chr15	74215114	74215448	335	74215289	22.00	19.34005	9.40924	15.22368	GR-356_Ctrl_10D_peak_1298
chr15	74531249	74531779	531	74531508	59.00	62.69857	18.94771	57.64156	GR-356_Ctrl_10D_peak_1299
chr15	75646891	75647178	288	75646999	20.00	17.72624	9.05381	13.66821	GR-356_Ctrl_10D_peak_1300
chr15	78798487	78798781	295	78798658	35.00	34.77985	13.77896	30.24303	GR-356_Ctrl_10D_peak_1301
chr15	79682361	79682590	230	79682447	12.00	10.61446	6.75807	6.86841	GR-356_Ctrl_10D_peak_1302
chr15	80549260	80549539	280	80549436	15.00	7.12379	4.11437	3.61532	GR-356_Ctrl_10D_peak_1303
chr15	80929343	80929556	214	80929457	15.00	12.69114	7.36357	8.83583	GR-356_Ctrl_10D_peak_1304
chr15	81313071	81313422	352	81313262	24.00	21.80094	10.22743	17.60134	GR-356_Ctrl_10D_peak_1305
chr15	82300290	82300603	314	82300460	23.00	25.61965	12.84190	21.29597	GR-356_Ctrl_10D_peak_1306
chr15	83286207	83286417	211	83286313	15.00	10.11215	5.79860	6.39343	GR-356_Ctrl_10D_peak_1307
chr15	83287765	83287975	211	83287852	19.00	12.56442	6.31590	8.71315	GR-356_Ctrl_10D_peak_1308
chr15	83288482	83288717	236	83288593	15.00	9.16004	5.24160	5.50222	GR-356_Ctrl_10D_peak_1309
chr15	85331173	85331555	383	85331363	45.00	45.66578	15.82990	40.90410	GR-356_Ctrl_10D_peak_1310
chr15	85344358	85344769	412	85344578	32.00	32.07315	13.38160	27.59659	GR-356_Ctrl_10D_peak_1311
chr15	85588177	85588408	232	85588280	15.00	12.85513	7.46430	8.99457	GR-356_Ctrl_10D_peak_1312
chr15	86877308	86877510	203	86877386	12.00	10.87226	6.91621	7.11008	GR-356_Ctrl_10D_peak_1313
chr15	87777034	87777257	224	87777189	10.00	8.34727	5.71837	4.73738	GR-356_Ctrl_10D_peak_1314
chr15	89167751	89168152	402	89167999	16.00	7.89826	4.37151	4.32601	GR-356_Ctrl_10D_peak_1315
chr15	89845546	89845828	283	89845651	13.00	8.68610	5.35848	5.06032	GR-356_Ctrl_10D_peak_1316
chr15	90419702	90420165	464	90419858	29.00	19.81433	7.71444	15.68581	GR-356_Ctrl_10D_peak_1317
chr15	92009167	92009369	203	92009265	15.00	11.35453	6.54556	7.56438	GR-356_Ctrl_10D_peak_1318
chr15	94965579	94965887	309	94965742	17.00	17.26211	9.63142	13.22009	GR-356_Ctrl_10D_peak_1319
chr15	95247134	95247336	203	95247271	12.00	8.22331	5.27154	4.62849	GR-356_Ctrl_10D_peak_1320
chr15	95684697	95685146	450	95684981	23.00	20.56168	9.81834	16.40304	GR-356_Ctrl_10D_peak_1321
chr15	98856574	98856827	254	98856718	19.00	15.66840	8.11006	11.69225	GR-356_Ctrl_10D_peak_1322
chr15	98896852	98897217	366	98897043	16.00	13.76839	7.77136	9.86667	GR-356_Ctrl_10D_peak_1323
chr15	100721020	100721422	403	100721208	23.00	19.48305	9.18597	15.36237	GR-356_Ctrl_10D_peak_1324
chr15	100721875	100722204	330	100722021	21.00	13.87695	6.57557	9.96892	GR-356_Ctrl_10D_peak_1325
chr15	100723371	100723632	262	100723547	15.00	11.25988	6.48805	7.47609	GR-356_Ctrl_10D_peak_1326
chr15	101127787	101128039	253	101127873	13.00	7.11342	4.42113	3.60941	GR-356_Ctrl_10D_peak_1327
chr15	101128227	101128476	250	101128312	11.00	6.83321	4.59299	3.34891	GR-356_Ctrl_10D_peak_1328
chr16	2835747	2836260	514	2835968	22.00	15.58957	7.26329	11.61718	GR-356_Ctrl_10D_peak_1329
chr16	3020884	3021144	261	3020996	15.00	11.25988	6.48805	7.47609	GR-356_Ctrl_10D_peak_1330
chr16	3214917	3215350	434	3215155	26.00	19.87698	8.52647	15.74164	GR-356_Ctrl_10D_peak_1331
chr16	10961462	10961667	206	10961526	12.00	10.93743	6.95603	7.17142	GR-356_Ctrl_10D_peak_1332
chr16	19480420	19480673	254	19480504	9.00	7.46279	5.32016	3.92089	GR-356_Ctrl_10D_peak_1333
chr16	19811270	19811818	549	19811702	18.00	11.59671	6.00011	7.79238	GR-356_Ctrl_10D_peak_1334
chr16	20851638	20851915	278	20851752	14.00	10.30761	6.13646	6.57570	GR-356_Ctrl_10D_peak_1335
chr16	20906707	20906920	214	20906814	12.00	9.70068	6.19179	6.00573	GR-356_Ctrl_10D_peak_1336
chr16	20910785	20910996	212	20910919	11.00	7.34068	4.90917	3.80450	GR-356_Ctrl_10D_peak_1337
chr16	22026458	22026883	426	22026712	17.00	11.54664	6.19431	7.75095	GR-356_Ctrl_10D_peak_1338
chr16	23124302	23124666	365	23124504	22.00	20.19188	9.91608	16.04475	GR-356_Ctrl_10D_peak_1339
chr16	24700823	24701286	464	24701086	72.00	73.25510	18.77180	68.03875	GR-356_Ctrl_10D_peak_1340
chr16	29821721	29822004	284	29821841	14.00	10.21939	6.08255	6.49609	GR-356_Ctrl_10D_peak_1341
chr16	31117954	31118687	734	31118052	20.00	11.22712	5.40011	7.44680	GR-356_Ctrl_10D_peak_1342
chr16	34582802	34583012	211	34583010	249.00	4.95697	1.31930	1.67862	GR-356_Ctrl_10D_peak_1343
chr16	46389803	46390374	572	46390178	285.00	7.64336	1.40238	4.09191	GR-356_Ctrl_10D_peak_1344
chr16	46394629	46394977	349	46394805	303.00	6.32647	1.33891	2.89837	GR-356_Ctrl_10D_peak_1345
chr16	47713211	47713521	311	47713381	24.00	17.69942	7.89488	13.64293	GR-356_Ctrl_10D_peak_1346
chr16	48963396	48963775	380	48963575	33.00	33.43903	13.78711	28.93029	GR-356_Ctrl_10D_peak_1347
chr16	48964173	48964510	338	48964326	17.00	10.65101	5.68431	6.89792	GR-356_Ctrl_10D_peak_1348
chr16	51538903	51539398	496	51539217	22.00	24.17774	12.30682	19.90195	GR-356_Ctrl_10D_peak_1349
chr16	53090989	53091277	289	53091107	16.00	11.09999	6.16101	7.32616	GR-356_Ctrl_10D_peak_1350
chr16	53131744	53132009	266	53131850	12.00	9.36569	5.98290	5.68975	GR-356_Ctrl_10D_peak_1351
chr16	54027048	54027473	426	54027335	24.00	19.79094	9.06031	15.66491	GR-356_Ctrl_10D_peak_1352
chr16	54080681	54080950	270	54080846	16.00	9.72846	5.36852	6.02673	GR-356_Ctrl_10D_peak_1353
chr16	56370802	56371115	314	56370925	15.00	14.24963	8.31763	10.33159	GR-356_Ctrl_10D_peak_1354
chr16	56481857	56482083	227	56481972	15.00	12.93883	7.51570	9.07634	GR-356_Ctrl_10D_peak_1355
chr16	56606592	56607595	1004	56607331	107.00	161.17490	46.27000	154.94905	GR-356_Ctrl_10D_peak_1356
chr16	56608121	56608530	410	56608383	42.00	39.26162	13.57919	34.62147	GR-356_Ctrl_10D_peak_1357
chr16	56610246	56610501	256	56610365	13.00	8.21603	5.07378	4.62604	GR-356_Ctrl_10D_peak_1358
chr16	56682199	56682401	203	56682234	12.00	8.22331	5.27154	4.62849	GR-356_Ctrl_10D_peak_1359
chr16	56910657	56910859	203	56910828	13.00	7.11342	4.42113	3.60941	GR-356_Ctrl_10D_peak_1360
chr16	57671466	57671746	281	57671629	19.00	19.96593	10.70158	15.82610	GR-356_Ctrl_10D_peak_1361
chr16	57842234	57842436	203	57842268	9.00	7.51202	5.35079	3.96361	GR-356_Ctrl_10D_peak_1362
chr16	57893970	57894271	302	57894117	17.00	10.65101	5.68431	6.89792	GR-356_Ctrl_10D_peak_1363
chr16	57938759	57939093	335	57938895	28.00	31.05078	14.31215	26.59171	GR-356_Ctrl_10D_peak_1364
chr16	66516836	66517170	335	66517023	30.00	30.73746	13.36515	26.28953	GR-356_Ctrl_10D_peak_1365
chr16	66618606	66618915	310	66618735	17.00	15.13403	8.34030	11.17686	GR-356_Ctrl_10D_peak_1366
chr16	66971172	66971522	351	66971213	12.00	6.29799	4.10534	2.87237	GR-356_Ctrl_10D_peak_1367
chr16	67055742	67056161	420	67056043	19.00	12.98741	6.55200	9.12393	GR-356_Ctrl_10D_peak_1368
chr16	67206840	67207095	256	67206894	15.00	14.65187	8.56126	10.70843	GR-356_Ctrl_10D_peak_1369
chr16	67269590	67269998	409	67269714	26.00	26.65816	12.42603	22.31889	GR-356_Ctrl_10D_peak_1370
chr16	67594938	67595245	308	67594972	9.00	6.63238	4.79641	3.16078	GR-356_Ctrl_10D_peak_1371
chr16	68064956	68065460	505	68065269	60.00	63.76784	19.06781	58.69750	GR-356_Ctrl_10D_peak_1372
chr16	68707930	68708132	203	68708067	10.00	8.27783	5.67512	4.68042	GR-356_Ctrl_10D_peak_1373
chr16	69039528	69039841	314	69039670	33.00	27.96687	10.73704	23.59138	GR-356_Ctrl_10D_peak_1374
chr16	69064077	69064562	486	69064294	78.00	104.95556	32.31869	99.32941	GR-356_Ctrl_10D_peak_1375
chr16	70577288	70577606	319	70577419	26.00	11.14530	4.45881	7.37053	GR-356_Ctrl_10D_peak_1376
chr16	70694098	70694423	326	70694223	19.00	15.78879	8.18195	11.80509	GR-356_Ctrl_10D_peak_1377
chr16	70750880	70751145	266	70750991	19.00	11.04572	5.49612	7.27607	GR-356_Ctrl_10D_peak_1378
chr16	72291256	72291849	594	72291663	62.00	59.50646	16.20032	54.50719	GR-356_Ctrl_10D_peak_1379
chr16	72877303	72877845	543	72877659	29.00	33.64775	15.47759	29.13270	GR-356_Ctrl_10D_peak_1380
chr16	72989607	72989909	303	72989741	36.00	31.63035	11.68442	27.16101	GR-356_Ctrl_10D_peak_1381
chr16	72990180	72990509	330	72990331	31.00	30.72021	12.97610	26.27355	GR-356_Ctrl_10D_peak_1382
chr16	74449185	74449752	568	74449367	17.00	10.54790	5.62657	6.80508	GR-356_Ctrl_10D_peak_1383
chr16	75305549	75306013	465	75305687	20.00	13.99944	6.87960	10.08676	GR-356_Ctrl_10D_peak_1384
chr16	81127100	81127421	322	81127264	16.00	15.94465	9.09634	11.95197	GR-356_Ctrl_10D_peak_1385
chr16	81604953	81605271	319	81605089	17.00	17.26211	9.63142	13.22009	GR-356_Ctrl_10D_peak_1386
chr16	83344171	83344373	203	83344191	14.00	7.95815	4.73693	4.37816	GR-356_Ctrl_10D_peak_1387
chr16	83349226	83349475	250	83349421	9.00	7.51202	5.35079	3.96361	GR-356_Ctrl_10D_peak_1388
chr16	84829276	84829622	347	84829438	20.00	21.35004	11.23666	17.16300	GR-356_Ctrl_10D_peak_1389
chr16	84832623	84832827	205	84832684	13.00	12.14649	7.49111	8.31795	GR-356_Ctrl_10D_peak_1390
chr16	84851253	84851681	429	84851429	19.00	17.48569	9.20447	13.43903	GR-356_Ctrl_10D_peak_1391
chr16	85354746	85354962	217	85354900	11.00	9.76027	6.42095	6.05470	GR-356_Ctrl_10D_peak_1392
chr16	86664341	86664815	475	86664615	46.00	56.65676	21.63050	51.70942	GR-356_Ctrl_10D_peak_1393
chr16	86751183	86751386	204	86751251	11.00	9.76027	6.42095	6.05470	GR-356_Ctrl_10D_peak_1394
chr16	86946417	86946796	380	86946539	18.00	18.60293	10.16650	14.51703	GR-356_Ctrl_10D_peak_1395
chr16	86951864	86952570	707	86952175	75.00	116.28677	40.66600	110.52302	GR-356_Ctrl_10D_peak_1396
chr16	87407611	87407826	216	87407725	13.00	12.14649	7.49111	8.31795	GR-356_Ctrl_10D_peak_1397
chr16	87790034	87790308	275	87790144	27.00	21.59980	9.17281	17.40873	GR-356_Ctrl_10D_peak_1398
chr16	87806999	87807262	264	87807130	18.00	9.77696	5.01910	6.07076	GR-356_Ctrl_10D_peak_1399
chr16	87870509	87871005	497	87870831	29.00	19.81433	7.71444	15.68581	GR-356_Ctrl_10D_peak_1400
chr16	88240120	88240329	210	88240225	13.00	12.14649	7.49111	8.31795	GR-356_Ctrl_10D_peak_1401
chr16	88304287	88304825	539	88304547	27.00	31.55738	14.98221	27.09214	GR-356_Ctrl_10D_peak_1402
chr16	88332121	88332371	251	88332234	13.00	12.14649	7.49111	8.31795	GR-356_Ctrl_10D_peak_1403
chr16	89316244	89316529	286	89316386	14.00	10.30761	6.13646	6.57570	GR-356_Ctrl_10D_peak_1404
chr16	89505378	89505818	441	89505576	28.00	26.92145	11.86382	22.56609	GR-356_Ctrl_10D_peak_1405
chr16	89581014	89581603	590	89581309	58.00	71.33707	24.13674	66.15255	GR-356_Ctrl_10D_peak_1406
chr17	694245	694545	301	694445	25.00	15.83259	6.68585	11.84545	GR-356_Ctrl_10D_peak_1407
chr17	933496	933771	276	933633	18.00	14.53192	7.70456	10.60465	GR-356_Ctrl_10D_peak_1408
chr17	952002	952204	203	952077	11.00	8.95550	5.92227	5.30388	GR-356_Ctrl_10D_peak_1409
chr17	1001242	1001476	235	1001378	17.00	14.18108	7.76041	10.26550	GR-356_Ctrl_10D_peak_1410
chr17	1110851	1111584	734	1111393	21.00	14.56176	6.94749	10.62918	GR-356_Ctrl_10D_peak_1411
chr17	1422853	1423147	295	1423000	25.00	8.17489	3.46675	4.58857	GR-356_Ctrl_10D_peak_1412
chr17	1731007	1731331	325	1731169	34.00	35.03465	14.31841	30.48792	GR-356_Ctrl_10D_peak_1413
chr17	2564937	2565187	251	2565078	15.00	12.69114	7.36357	8.83583	GR-356_Ctrl_10D_peak_1414
chr17	2955099	2955406	308	2955243	22.00	16.76213	7.91495	12.74396	GR-356_Ctrl_10D_peak_1415
chr17	5776160	5776590	431	5776312	16.00	9.72846	5.36852	6.02673	GR-356_Ctrl_10D_peak_1416
chr17	6003248	6003594	347	6003411	33.00	21.03188	7.37365	16.85503	GR-356_Ctrl_10D_peak_1417
chr17	6591426	6591933	508	6591709	24.00	14.87636	6.42870	10.92602	GR-356_Ctrl_10D_peak_1418
chr17	6752620	6753342	723	6753205	18.00	13.80571	7.27223	9.90112	GR-356_Ctrl_10D_peak_1419
chr17	8151792	8152067	276	8151928	32.00	20.05657	7.15677	15.91368	GR-356_Ctrl_10D_peak_1420
chr17	8154287	8154758	472	8154457	68.00	67.67997	17.74321	62.54818	GR-356_Ctrl_10D_peak_1421
chr17	8173396	8173708	313	8173576	15.00	11.25988	6.48805	7.47609	GR-356_Ctrl_10D_peak_1422
chr17	9217503	9217721	219	9217606	13.00	12.14649	7.49111	8.31795	GR-356_Ctrl_10D_peak_1423
chr17	13541027	13541519	493	13541387	23.00	16.63569	7.57908	12.62046	GR-356_Ctrl_10D_peak_1424
chr17	13544140	13544617	478	13544269	24.00	14.87636	6.42870	10.92602	GR-356_Ctrl_10D_peak_1425
chr17	14738362	14738669	308	14738533	27.00	20.98960	8.84227	16.81438	GR-356_Ctrl_10D_peak_1426
chr17	15490962	15491185	224	15491022	15.00	7.12379	4.11437	3.61532	GR-356_Ctrl_10D_peak_1427
chr17	15646308	15646538	231	15646447	16.00	10.56882	5.85018	6.82410	GR-356_Ctrl_10D_peak_1428
chr17	15959155	15959386	232	15959290	13.00	8.68610	5.35848	5.06032	GR-356_Ctrl_10D_peak_1429
chr17	15963388	15963616	229	15963487	17.00	11.54664	6.19431	7.75095	GR-356_Ctrl_10D_peak_1430
chr17	16286344	16286761	418	16286504	22.00	20.73238	10.23969	16.56986	GR-356_Ctrl_10D_peak_1431
chr17	16865061	16865393	333	16865216	14.00	7.95815	4.73693	4.37816	GR-356_Ctrl_10D_peak_1432
chr17	17010532	17010913	382	17010654	12.00	8.75946	5.60474	5.12077	GR-356_Ctrl_10D_peak_1433
chr17	17416668	17417021	354	17416794	12.00	8.22331	5.27154	4.62849	GR-356_Ctrl_10D_peak_1434
chr17	17900693	17901061	369	17900962	11.00	6.83321	4.59299	3.34891	GR-356_Ctrl_10D_peak_1435
chr17	17921277	17921558	282	17921434	13.00	9.78813	6.03587	6.07882	GR-356_Ctrl_10D_peak_1436
chr17	19032593	19033016	424	19032959	16.00	9.72846	5.36852	6.02673	GR-356_Ctrl_10D_peak_1437
chr17	19037752	19038541	790	19038220	91.00	127.43826	37.30629	121.56055	GR-356_Ctrl_10D_peak_1438
chr17	19062004	19062309	306	19062160	23.00	17.15222	7.86240	13.11785	GR-356_Ctrl_10D_peak_1439
chr17	19063871	19064256	386	19063996	19.00	8.72066	4.33744	5.08718	GR-356_Ctrl_10D_peak_1440
chr17	19091244	19091528	285	19091330	32.00	15.84069	5.44966	11.85333	GR-356_Ctrl_10D_peak_1441
chr17	19112303	19112681	379	19112441	20.00	13.43072	6.56433	9.54682	GR-356_Ctrl_10D_peak_1442
chr17	19136041	19136759	719	19136340	78.00	90.85711	24.69438	85.40914	GR-356_Ctrl_10D_peak_1443
chr17	19141496	19141972	477	19141787	24.00	19.79094	9.06031	15.66491	GR-356_Ctrl_10D_peak_1444
chr17	19144434	19144641	208	19144483	14.00	7.17713	4.29514	3.66668	GR-356_Ctrl_10D_peak_1445
chr17	19160536	19160957	422	19160732	34.00	22.01969	7.59052	17.81164	GR-356_Ctrl_10D_peak_1446
chr17	19187959	19188409	451	19188136	32.00	22.95109	8.48588	18.71434	GR-356_Ctrl_10D_peak_1447
chr17	19189811	19190221	411	19189997	15.00	7.12379	4.11437	3.61532	GR-356_Ctrl_10D_peak_1448
chr17	19217340	19217730	391	19217586	32.00	26.57063	10.31537	22.23279	GR-356_Ctrl_10D_peak_1449
chr17	19386902	19387185	284	19387010	14.00	9.65783	5.74123	5.96542	GR-356_Ctrl_10D_peak_1450
chr17	20064054	20064399	346	20064206	27.00	18.78894	7.69457	14.69106	GR-356_Ctrl_10D_peak_1451
chr17	21429942	21430256	315	21430056	16.00	12.42749	6.95465	8.58616	GR-356_Ctrl_10D_peak_1452
chr17	21460538	21460748	211	21460614	14.00	12.63223	7.56709	8.78020	GR-356_Ctrl_10D_peak_1453
chr17	28808837	28809216	380	28809017	37.00	28.43243	9.77162	24.03705	GR-356_Ctrl_10D_peak_1454
chr17	31627815	31628326	512	31627963	48.00	33.42299	9.18770	28.91755	GR-356_Ctrl_10D_peak_1455
chr17	31654851	31655116	266	31655018	20.00	21.24224	11.17233	17.06107	GR-356_Ctrl_10D_peak_1456
chr17	35238844	35239046	203	35238947	12.00	8.29870	5.31827	4.69290	GR-356_Ctrl_10D_peak_1457
chr17	38286551	38286785	235	38286697	14.00	9.15029	5.43619	5.49398	GR-356_Ctrl_10D_peak_1458
chr17	38454611	38454825	215	38454741	14.00	10.30761	6.13646	6.57570	GR-356_Ctrl_10D_peak_1459
chr17	40021421	40021953	533	40021763	54.00	43.97340	11.92796	39.24348	GR-356_Ctrl_10D_peak_1460
chr17	40486015	40486674	660	40486266	24.00	12.75363	5.42180	8.89377	GR-356_Ctrl_10D_peak_1461
chr17	40510259	40510616	358	40510458	53.00	54.15467	17.05294	49.24373	GR-356_Ctrl_10D_peak_1462
chr17	40521527	40521951	425	40521801	24.00	17.69942	7.89488	13.64293	GR-356_Ctrl_10D_peak_1463
chr17	41049234	41049459	226	41049308	18.00	14.64586	7.77285	10.70526	GR-356_Ctrl_10D_peak_1464
chr17	42815023	42815458	436	42815281	26.00	23.10785	10.33422	18.86118	GR-356_Ctrl_10D_peak_1465
chr17	43457079	43457282	204	43457155	12.00	8.22331	5.27154	4.62849	GR-356_Ctrl_10D_peak_1466
chr17	43469126	43469379	254	43469258	14.00	8.26455	4.91400	4.66776	GR-356_Ctrl_10D_peak_1467
chr17	43700461	43700875	415	43700608	17.00	10.65101	5.68431	6.89792	GR-356_Ctrl_10D_peak_1468
chr17	43701319	43701573	255	43701481	15.00	10.11215	5.79860	6.39343	GR-356_Ctrl_10D_peak_1469
chr17	45293584	45293844	261	45293698	19.00	15.66840	8.11006	11.69225	GR-356_Ctrl_10D_peak_1470
chr17	47279296	47279508	213	47279413	21.00	10.27760	4.77118	6.55237	GR-356_Ctrl_10D_peak_1471
chr17	47502418	47502653	236	47502543	19.00	8.72066	4.33744	5.08718	GR-356_Ctrl_10D_peak_1472
chr17	48240638	48240899	262	48240780	19.00	8.72066	4.33744	5.08718	GR-356_Ctrl_10D_peak_1473
chr17	48246706	48246971	266	48246832	29.00	15.13619	5.62512	11.17838	GR-356_Ctrl_10D_peak_1474
chr17	48472727	48473325	599	48473129	53.00	45.27463	12.77998	40.51903	GR-356_Ctrl_10D_peak_1475
chr17	48483095	48484239	1145	48484037	74.00	84.66843	23.44403	79.29839	GR-356_Ctrl_10D_peak_1476
chr17	48485026	48485267	242	48485181	18.00	12.21146	6.34633	8.38231	GR-356_Ctrl_10D_peak_1477
chr17	48972330	48972560	231	48972450	23.00	16.49401	7.50209	12.48632	GR-356_Ctrl_10D_peak_1478
chr17	49439785	49440149	365	49439969	17.00	14.51243	7.96170	10.58832	GR-356_Ctrl_10D_peak_1479
chr17	49566065	49566362	298	49566220	20.00	16.95276	8.59104	12.92164	GR-356_Ctrl_10D_peak_1480
chr17	49646811	49647141	331	49646840	20.00	9.48921	4.55431	5.80980	GR-356_Ctrl_10D_peak_1481
chr17	50028370	50028606	237	50028496	21.00	14.43295	6.87692	10.51053	GR-356_Ctrl_10D_peak_1482
chr17	50062393	50062609	217	50062463	15.00	7.12379	4.11437	3.61532	GR-356_Ctrl_10D_peak_1483
chr17	50064539	50065007	469	50064850	17.00	8.27669	4.41312	4.67968	GR-356_Ctrl_10D_peak_1484
chr17	50218846	50219055	210	50218891	15.00	8.83037	5.05272	5.18296	GR-356_Ctrl_10D_peak_1485
chr17	50638915	50639557	643	50639448	17.00	11.76695	6.32189	7.95810	GR-356_Ctrl_10D_peak_1486
chr17	53462453	53462672	220	53462603	14.00	7.87427	4.68881	4.30879	GR-356_Ctrl_10D_peak_1487
chr17	54948256	54948665	410	54948500	39.00	30.70580	10.28592	26.26149	GR-356_Ctrl_10D_peak_1488
chr17	55162322	55162543	222	55162408	20.00	7.01318	3.46797	3.52074	GR-356_Ctrl_10D_peak_1489
chr17	55273611	55273830	220	55273767	17.00	12.54019	6.77542	8.69655	GR-356_Ctrl_10D_peak_1490
chr17	55454847	55455209	363	55454989	26.00	19.71597	8.43985	15.59237	GR-356_Ctrl_10D_peak_1491
chr17	56184636	56184855	220	56184701	22.00	12.88438	5.84923	9.02335	GR-356_Ctrl_10D_peak_1492
chr17	56186379	56186605	227	56186498	15.00	8.83037	5.05272	5.18296	GR-356_Ctrl_10D_peak_1493
chr17	56681897	56682161	265	56681913	18.00	5.78491	3.13768	2.40061	GR-356_Ctrl_10D_peak_1494
chr17	56785498	56785723	226	56785587	20.00	13.99944	6.87960	10.08676	GR-356_Ctrl_10D_peak_1495
chr17	56787013	56787355	343	56787197	37.00	31.63990	11.35781	27.17003	GR-356_Ctrl_10D_peak_1496
chr17	56915825	56916036	212	56915972	13.00	5.65348	3.60007	2.27384	GR-356_Ctrl_10D_peak_1497
chr17	57215332	57215611	280	57215490	16.00	12.89413	7.23778	9.03299	GR-356_Ctrl_10D_peak_1498
chr17	57879002	57879327	326	57879170	28.00	14.29356	5.43762	10.37437	GR-356_Ctrl_10D_peak_1499
chr17	57890423	57890632	210	57890557	11.00	7.09060	4.75301	3.59486	GR-356_Ctrl_10D_peak_1500
chr17	57892939	57893378	440	57893066	24.00	16.31435	7.15856	12.31048	GR-356_Ctrl_10D_peak_1501
chr17	57948495	57949280	786	57949051	69.00	62.58994	15.18104	57.53900	GR-356_Ctrl_10D_peak_1502
chr17	57985620	57985838	219	57985748	15.00	8.74009	5.00139	5.10498	GR-356_Ctrl_10D_peak_1503
chr17	58391619	58391980	362	58391800	18.00	12.54767	6.53844	8.70243	GR-356_Ctrl_10D_peak_1504
chr17	58402100	58402431	332	58402265	22.00	14.32561	6.58588	10.40539	GR-356_Ctrl_10D_peak_1505
chr17	58402736	58402961	226	58402844	19.00	10.63634	5.28327	6.89007	GR-356_Ctrl_10D_peak_1506
chr17	59763966	59764264	299	59764143	19.00	7.43271	3.75008	3.89296	GR-356_Ctrl_10D_peak_1507
chr17	59782861	59783213	353	59783040	36.00	26.36935	9.07140	22.03370	GR-356_Ctrl_10D_peak_1508
chr17	59786505	59786839	335	59786665	33.00	29.12105	11.35658	24.71919	GR-356_Ctrl_10D_peak_1509
chr17	59825488	59825929	442	59825725	160.00	213.95117	41.40081	207.27094	GR-356_Ctrl_10D_peak_1510
chr17	59829283	59829517	235	59829420	15.00	7.98919	4.58148	4.40650	GR-356_Ctrl_10D_peak_1511
chr17	59837390	59838017	628	59837596	71.00	65.18391	15.61478	60.08875	GR-356_Ctrl_10D_peak_1512
chr17	62778985	62779342	358	62779171	21.00	10.27760	4.77118	6.55237	GR-356_Ctrl_10D_peak_1513
chr17	62790621	62790898	278	62790799	26.00	14.48959	5.85554	10.56558	GR-356_Ctrl_10D_peak_1514
chr17	62792000	62792475	476	62792201	44.00	41.88770	14.21078	37.19566	GR-356_Ctrl_10D_peak_1515
chr17	62819761	62820181	421	62819991	70.00	54.12683	11.72503	49.21999	GR-356_Ctrl_10D_peak_1516
chr17	62824911	62825177	267	62825018	11.00	6.07889	4.12954	2.67014	GR-356_Ctrl_10D_peak_1517
chr17	62859281	62859555	275	62859431	15.00	13.46672	7.83964	9.58161	GR-356_Ctrl_10D_peak_1518
chr17	63460905	63461113	209	63461030	12.00	8.22331	5.27154	4.62849	GR-356_Ctrl_10D_peak_1519
chr17	64230638	64230997	360	64230858	34.00	29.17595	11.05283	24.77007	GR-356_Ctrl_10D_peak_1520
chr17	64679773	64680066	294	64679896	20.00	12.41014	6.01319	8.57445	GR-356_Ctrl_10D_peak_1521
chr17	64707199	64707467	269	64707341	23.00	13.93699	6.17155	10.02573	GR-356_Ctrl_10D_peak_1522
chr17	66467059	66467394	336	66467209	24.00	12.75363	5.42180	8.89377	GR-356_Ctrl_10D_peak_1523
chr17	66676070	66676331	262	66676190	19.00	15.66840	8.11006	11.69225	GR-356_Ctrl_10D_peak_1524
chr17	66677781	66678110	330	66677924	14.00	8.26455	4.91400	4.66776	GR-356_Ctrl_10D_peak_1525
chr17	66905361	66905569	209	66905417	18.00	11.01477	5.67891	7.24716	GR-356_Ctrl_10D_peak_1526
chr17	67246719	67246989	271	67246831	18.00	9.51884	4.88581	5.83557	GR-356_Ctrl_10D_peak_1527
chr17	67421917	67422324	408	67422106	59.00	65.92818	20.64769	60.82235	GR-356_Ctrl_10D_peak_1528
chr17	68378138	68378447	310	68378278	31.00	27.25895	11.01210	22.89597	GR-356_Ctrl_10D_peak_1529
chr17	69592985	69593289	305	69593097	18.00	11.59671	6.00011	7.79238	GR-356_Ctrl_10D_peak_1530
chr17	69870170	69870614	445	69870416	21.00	10.27760	4.77118	6.55237	GR-356_Ctrl_10D_peak_1531
chr17	70405510	70405844	335	70405777	13.00	5.65348	3.60007	2.27384	GR-356_Ctrl_10D_peak_1532
chr17	71071985	71072317	333	71072126	36.00	24.03145	8.02426	19.76189	GR-356_Ctrl_10D_peak_1533
chr17	71188955	71189243	289	71189184	14.00	6.29544	3.81471	2.87237	GR-356_Ctrl_10D_peak_1534
chr17	71251303	71251588	286	71251439	15.00	11.07237	6.37436	7.30254	GR-356_Ctrl_10D_peak_1535
chr17	71438619	71439015	397	71438775	14.00	7.95815	4.73693	4.37816	GR-356_Ctrl_10D_peak_1536
chr17	71792992	71793340	349	71793141	32.00	28.49814	11.35623	24.10143	GR-356_Ctrl_10D_peak_1537
chr17	71900834	71901157	324	71901025	24.00	17.55129	7.81468	13.50081	GR-356_Ctrl_10D_peak_1538
chr17	72362630	72363121	492	72362925	63.00	60.85223	16.45747	55.82816	GR-356_Ctrl_10D_peak_1539
chr17	72389200	72389511	312	72389398	39.00	31.29453	10.56653	26.83372	GR-356_Ctrl_10D_peak_1540
chr17	72421286	72421509	224	72421400	20.00	13.99944	6.87960	10.08676	GR-356_Ctrl_10D_peak_1541
chr17	72422879	72423499	621	72423070	30.00	20.84636	7.97159	16.68005	GR-356_Ctrl_10D_peak_1542
chr17	72589023	72589396	374	72589130	28.00	22.11738	9.15806	17.90403	GR-356_Ctrl_10D_peak_1543
chr17	72609394	72609811	418	72609611	45.00	49.96175	18.21988	45.12564	GR-356_Ctrl_10D_peak_1544
chr17	72716019	72716564	546	72716370	53.00	42.79012	11.71109	38.08441	GR-356_Ctrl_10D_peak_1545
chr17	73796760	73797051	292	73796925	27.00	18.78894	7.69457	14.69106	GR-356_Ctrl_10D_peak_1546
chr17	74605464	74605729	266	74605636	23.00	13.93699	6.17155	10.02573	GR-356_Ctrl_10D_peak_1547
chr17	75078737	75079011	275	75078828	13.00	8.83652	5.45023	5.18841	GR-356_Ctrl_10D_peak_1548
chr17	75685083	75685411	329	75685237	36.00	33.58048	12.73274	29.06763	GR-356_Ctrl_10D_peak_1549
chr17	75693456	75694104	649	75693918	70.00	76.64446	21.22117	71.38086	GR-356_Ctrl_10D_peak_1550
chr17	75700272	75700828	557	75700606	36.00	34.93305	13.48089	30.39074	GR-356_Ctrl_10D_peak_1551
chr17	76048695	76048915	221	76048807	19.00	11.48192	5.72685	7.69008	GR-356_Ctrl_10D_peak_1552
chr17	76252001	76252516	516	76252263	47.00	43.11666	13.74443	38.40413	GR-356_Ctrl_10D_peak_1553
chr17	76447102	76447380	279	76447197	27.00	15.38130	6.07242	11.41640	GR-356_Ctrl_10D_peak_1554
chr17	76527845	76528195	351	76528005	58.00	52.64214	14.46521	47.75797	GR-356_Ctrl_10D_peak_1555
chr17	76546656	76546906	251	76546828	23.00	13.79978	6.10354	9.89778	GR-356_Ctrl_10D_peak_1556
chr17	77109952	77110242	291	77110131	12.00	7.74386	4.97573	4.18694	GR-356_Ctrl_10D_peak_1557
chr17	77122613	77122826	214	77122726	19.00	11.04572	5.49612	7.27607	GR-356_Ctrl_10D_peak_1558
chr17	77124176	77124734	559	77124367	60.00	56.83550	15.68602	51.88449	GR-356_Ctrl_10D_peak_1559
chr17	77125322	77126068	747	77125664	84.00	90.52841	21.85757	85.08486	GR-356_Ctrl_10D_peak_1560
chr17	77139810	77140155	346	77139973	38.00	23.30622	7.31266	19.05319	GR-356_Ctrl_10D_peak_1561
chr17	77255386	77255700	315	77255627	17.00	11.54664	6.19431	7.75095	GR-356_Ctrl_10D_peak_1562
chr17	77477241	77477647	407	77477347	26.00	22.14883	9.78514	17.93335	GR-356_Ctrl_10D_peak_1563
chr17	78315615	78315825	211	78315680	15.00	10.54391	6.05602	6.80249	GR-356_Ctrl_10D_peak_1564
chr17	78353075	78353434	360	78353219	20.00	13.55309	6.63170	9.65682	GR-356_Ctrl_10D_peak_1565
chr17	78592447	78592649	203	78592608	17.00	8.93949	4.75494	5.29027	GR-356_Ctrl_10D_peak_1566
chr17	78680955	78681254	300	78681079	22.00	20.19188	9.91608	16.04475	GR-356_Ctrl_10D_peak_1567
chr17	78883172	78883460	289	78883259	15.00	7.98919	4.58148	4.40650	GR-356_Ctrl_10D_peak_1568
chr17	80505104	80505399	296	80505291	17.00	7.24685	3.90370	3.73324	GR-356_Ctrl_10D_peak_1569
chr17	80512187	80512451	265	80512328	23.00	21.45270	10.34721	17.26322	GR-356_Ctrl_10D_peak_1570
chr17	80724756	80725176	421	80724976	80.00	84.68396	20.82898	79.31277	GR-356_Ctrl_10D_peak_1571
chr17	81043755	81044244	490	81043985	66.00	72.57220	20.94334	67.37146	GR-356_Ctrl_10D_peak_1572
chr17	81050235	81050493	259	81050391	24.00	16.91158	7.47224	12.88545	GR-356_Ctrl_10D_peak_1573
chr17	82297385	82298370	986	82297568	89.00	89.53596	19.51848	84.10317	GR-356_Ctrl_10D_peak_1574
chr18	108058	108324	267	108227	78.00	5.37267	1.69897	2.05885	GR-356_Ctrl_10D_peak_1575
chr18	2981306	2981508	203	2981408	15.00	8.83037	5.05272	5.18296	GR-356_Ctrl_10D_peak_1576
chr18	3367656	3368054	399	3367845	34.00	32.16977	12.68444	27.68873	GR-356_Ctrl_10D_peak_1577
chr18	3579878	3580082	205	3579995	14.00	9.15029	5.43619	5.49398	GR-356_Ctrl_10D_peak_1578
chr18	3624050	3624475	426	3624205	15.00	8.83037	5.05272	5.18296	GR-356_Ctrl_10D_peak_1579
chr18	7921367	7921569	203	7921461	13.00	10.44517	6.44313	6.70492	GR-356_Ctrl_10D_peak_1580
chr18	9017756	9018166	411	9018017	16.00	10.56882	5.85018	6.82410	GR-356_Ctrl_10D_peak_1581
chr18	9743598	9743866	269	9743733	17.00	8.69704	4.62866	5.06540	GR-356_Ctrl_10D_peak_1582
chr18	9808545	9808758	214	9808708	11.00	9.76027	6.42095	6.05470	GR-356_Ctrl_10D_peak_1583
chr18	10010636	10010960	325	10010790	35.00	30.39722	11.36863	25.95806	GR-356_Ctrl_10D_peak_1584
chr18	10041136	10041465	330	10041275	24.00	21.80094	10.22743	17.60134	GR-356_Ctrl_10D_peak_1585
chr18	10122078	10122287	210	10122131	15.00	8.83037	5.05272	5.18296	GR-356_Ctrl_10D_peak_1586
chr18	11120077	11120282	206	11120138	13.00	9.54737	5.88703	5.86360	GR-356_Ctrl_10D_peak_1587
chr18	11323533	11323805	273	11323714	15.00	11.25988	6.48805	7.47609	GR-356_Ctrl_10D_peak_1588
chr18	11500466	11500757	292	11500575	16.00	12.42749	6.95465	8.58616	GR-356_Ctrl_10D_peak_1589
chr18	14470051	14470558	508	14470247	17.00	16.34980	9.08051	12.34554	GR-356_Ctrl_10D_peak_1590
chr18	14559353	14559804	452	14559536	13.00	12.14649	7.49111	8.31795	GR-356_Ctrl_10D_peak_1591
chr18	14826977	14827406	430	14827224	47.00	45.89777	15.15817	41.12805	GR-356_Ctrl_10D_peak_1592
chr18	22432696	22433205	510	22432937	47.00	40.20762	12.34310	35.55635	GR-356_Ctrl_10D_peak_1593
chr18	23581013	23581264	252	23581188	17.00	13.52504	7.36375	9.63421	GR-356_Ctrl_10D_peak_1594
chr18	23626543	23626926	384	23626736	23.00	20.41550	9.73208	16.26382	GR-356_Ctrl_10D_peak_1595
chr18	23627466	23627687	222	23627554	22.00	9.56208	4.31259	5.87762	GR-356_Ctrl_10D_peak_1596
chr18	23839000	23839278	279	23839146	16.00	13.04442	7.32928	9.17460	GR-356_Ctrl_10D_peak_1597
chr18	24076295	24076635	341	24076437	43.00	35.37877	11.31451	30.82545	GR-356_Ctrl_10D_peak_1598
chr18	25786810	25787054	245	25786926	10.00	6.41677	4.50007	2.96268	GR-356_Ctrl_10D_peak_1599
chr18	26471115	26471398	284	26471238	17.00	13.52504	7.36375	9.63421	GR-356_Ctrl_10D_peak_1600
chr18	26617173	26617411	239	26617296	21.00	15.03150	7.20720	11.07672	GR-356_Ctrl_10D_peak_1601
chr18	28111969	28112329	361	28112147	20.00	12.41014	6.01319	8.57445	GR-356_Ctrl_10D_peak_1602
chr18	29154223	29155387	1165	29154762	45.00	37.77456	11.82880	33.17066	GR-356_Ctrl_10D_peak_1603
chr18	29165360	29165598	239	29165433	20.00	14.61480	7.22669	10.67925	GR-356_Ctrl_10D_peak_1604
chr18	29418177	29418412	236	29418260	11.00	8.95550	5.92227	5.30388	GR-356_Ctrl_10D_peak_1605
chr18	32383160	32383362	203	32383199	13.00	9.28838	5.72736	5.61672	GR-356_Ctrl_10D_peak_1606
chr18	36309507	36309925	419	36309820	20.00	16.95276	8.59104	12.92164	GR-356_Ctrl_10D_peak_1607
chr18	36519528	36519802	275	36519656	19.00	10.36255	5.14296	6.62581	GR-356_Ctrl_10D_peak_1608
chr18	37419301	37419609	309	37419459	19.00	17.48569	9.20447	13.43903	GR-356_Ctrl_10D_peak_1609
chr18	39946705	39947018	314	39946900	12.00	10.93743	6.95603	7.17142	GR-356_Ctrl_10D_peak_1610
chr18	40868137	40868872	736	40868645	34.00	37.90300	15.99986	33.29381	GR-356_Ctrl_10D_peak_1611
chr18	41761659	41761913	255	41761692	13.00	7.11342	4.42113	3.60941	GR-356_Ctrl_10D_peak_1612
chr18	42442677	42442966	290	42442825	17.00	13.52504	7.36375	9.63421	GR-356_Ctrl_10D_peak_1613
chr18	42443502	42443777	276	42443634	9.00	5.52982	4.09097	2.16270	GR-356_Ctrl_10D_peak_1614
chr18	42446233	42446558	326	42446388	36.00	33.58048	12.73274	29.06763	GR-356_Ctrl_10D_peak_1615
chr18	46264295	46264498	204	46264347	13.00	9.28838	5.72736	5.61672	GR-356_Ctrl_10D_peak_1616
chr18	46321257	46321702	446	46321546	19.00	19.19849	10.24093	15.08950	GR-356_Ctrl_10D_peak_1617
chr18	47323337	47323661	325	47323506	18.00	18.60293	10.16650	14.51703	GR-356_Ctrl_10D_peak_1618
chr18	48453309	48453737	429	48453600	17.00	13.52504	7.36375	9.63421	GR-356_Ctrl_10D_peak_1619
chr18	48998177	48998561	385	48998322	24.00	21.80094	10.22743	17.60134	GR-356_Ctrl_10D_peak_1620
chr18	58218148	58218437	290	58218295	16.00	12.12614	6.77276	8.30044	GR-356_Ctrl_10D_peak_1621
chr18	58417933	58418168	236	58418061	11.00	9.76027	6.42095	6.05470	GR-356_Ctrl_10D_peak_1622
chr18	58998515	58998733	219	58998539	12.00	6.29799	4.10534	2.87237	GR-356_Ctrl_10D_peak_1623
chr18	59516378	59516701	324	59516531	27.00	25.61799	11.45473	21.29588	GR-356_Ctrl_10D_peak_1624
chr18	59715996	59716305	310	59716139	28.00	22.11738	9.15806	17.90403	GR-356_Ctrl_10D_peak_1625
chr18	59718110	59718472	363	59718383	15.00	11.35453	6.54556	7.56438	GR-356_Ctrl_10D_peak_1626
chr18	59744181	59744702	522	59744319	23.00	17.86373	8.25908	13.80007	GR-356_Ctrl_10D_peak_1627
chr18	59748586	59748926	341	59748748	28.00	16.28809	6.28929	12.28464	GR-356_Ctrl_10D_peak_1628
chr18	59779946	59780351	406	59780156	38.00	41.99160	16.70861	37.29870	GR-356_Ctrl_10D_peak_1629
chr18	59814964	59815208	245	59815142	16.00	9.72846	5.36852	6.02673	GR-356_Ctrl_10D_peak_1630
chr18	59952988	59953192	205	59953021	11.00	7.18015	4.80886	3.66945	GR-356_Ctrl_10D_peak_1631
chr18	59954712	59955210	499	59954930	65.00	63.56386	16.97176	58.49475	GR-356_Ctrl_10D_peak_1632
chr18	62451208	62451447	240	62451266	10.00	7.88452	5.42875	4.31631	GR-356_Ctrl_10D_peak_1633
chr18	62877493	62877763	271	62877621	38.00	29.56363	10.02877	25.14299	GR-356_Ctrl_10D_peak_1634
chr18	62881503	62882028	526	62881763	35.00	40.15210	16.91033	35.50457	GR-356_Ctrl_10D_peak_1635
chr18	63882717	63883036	320	63882880	22.00	15.45432	7.18950	11.48781	GR-356_Ctrl_10D_peak_1636
chr18	67265709	67266321	613	67266089	33.00	27.96687	10.73704	23.59138	GR-356_Ctrl_10D_peak_1637
chr18	73564018	73564397	380	73564278	17.00	17.17031	9.57629	13.13346	GR-356_Ctrl_10D_peak_1638
chr18	74746193	74746395	203	74746349	10.00	4.76356	3.47375	1.50489	GR-356_Ctrl_10D_peak_1639
chr18	75489926	75490277	352	75490110	29.00	28.23959	12.27292	23.85041	GR-356_Ctrl_10D_peak_1640
chr18	76740386	76740627	242	76740486	14.00	10.21939	6.08255	6.49609	GR-356_Ctrl_10D_peak_1641
chr18	79791574	79791990	417	79791801	59.00	50.00418	13.01232	45.16339	GR-356_Ctrl_10D_peak_1642
chr19	677099	677301	203	677189	11.00	7.76250	5.17361	4.20185	GR-356_Ctrl_10D_peak_1643
chr19	1016740	1017050	311	1016876	23.00	25.61965	12.84190	21.29597	GR-356_Ctrl_10D_peak_1644
chr19	1216030	1216313	284	1216202	21.00	14.43295	6.87692	10.51053	GR-356_Ctrl_10D_peak_1645
chr19	1265364	1265578	215	1265426	17.00	12.11236	6.52343	8.28673	GR-356_Ctrl_10D_peak_1646
chr19	1773351	1773617	267	1773480	25.00	18.78006	8.21068	14.68246	GR-356_Ctrl_10D_peak_1647
chr19	2032334	2032740	407	2032506	41.00	45.05320	17.18209	40.30270	GR-356_Ctrl_10D_peak_1648
chr19	2282221	2282539	319	2282343	12.00	10.06080	6.41579	6.34686	GR-356_Ctrl_10D_peak_1649
chr19	2491457	2491860	404	2491629	26.00	16.80506	6.94299	12.78369	GR-356_Ctrl_10D_peak_1650
chr19	2529489	2529880	392	2529721	48.00	36.99600	10.62673	32.40718	GR-356_Ctrl_10D_peak_1651
chr19	2532656	2533158	503	2533007	33.00	30.87040	12.32203	26.41851	GR-356_Ctrl_10D_peak_1652
chr19	2540781	2541045	265	2540898	13.00	10.44517	6.44313	6.70492	GR-356_Ctrl_10D_peak_1653
chr19	2543945	2544312	368	2544118	29.00	29.36590	12.93402	24.95514	GR-356_Ctrl_10D_peak_1654
chr19	2627504	2627944	441	2627704	74.00	102.76055	33.39030	97.16145	GR-356_Ctrl_10D_peak_1655
chr19	3305153	3305445	293	3305298	14.00	13.38527	8.02619	9.50636	GR-356_Ctrl_10D_peak_1656
chr19	3336779	3337114	336	3336956	28.00	16.28809	6.28929	12.28464	GR-356_Ctrl_10D_peak_1657
chr19	4131121	4131381	261	4131249	26.00	19.87698	8.52647	15.74164	GR-356_Ctrl_10D_peak_1658
chr19	4870044	4870368	325	4870176	16.00	12.32642	6.89355	8.49305	GR-356_Ctrl_10D_peak_1659
chr19	4878152	4878399	248	4878306	19.00	15.78879	8.18195	11.80509	GR-356_Ctrl_10D_peak_1660
chr19	5173112	5173707	596	5173366	26.00	24.32971	11.04563	20.04797	GR-356_Ctrl_10D_peak_1661
chr19	5345867	5346284	418	5346104	27.00	24.34837	10.71697	20.06435	GR-356_Ctrl_10D_peak_1662
chr19	5805903	5806106	204	5805983	13.00	9.28838	5.72736	5.61672	GR-356_Ctrl_10D_peak_1663
chr19	6273827	6274084	258	6273934	12.00	6.29799	4.10534	2.87237	GR-356_Ctrl_10D_peak_1664
chr19	6362602	6362804	203	6362736	12.00	8.29870	5.31827	4.69290	GR-356_Ctrl_10D_peak_1665
chr19	6744886	6745265	380	6745070	26.00	26.65816	12.42603	22.31889	GR-356_Ctrl_10D_peak_1666
chr19	8355549	8356172	624	8355882	110.00	143.90703	35.05327	137.85158	GR-356_Ctrl_10D_peak_1667
chr19	11142516	11142784	269	11142664	13.00	11.19792	6.90931	7.42110	GR-356_Ctrl_10D_peak_1668
chr19	11142898	11143294	397	11143094	11.00	7.34068	4.90917	3.80450	GR-356_Ctrl_10D_peak_1669
chr19	14510596	14510897	302	14510726	22.00	19.20033	9.32657	15.08950	GR-356_Ctrl_10D_peak_1670
chr19	16063899	16064230	332	16064048	9.00	7.39675	5.27898	3.85807	GR-356_Ctrl_10D_peak_1671
chr19	16161945	16162166	222	16162014	21.00	8.83310	4.12509	5.18506	GR-356_Ctrl_10D_peak_1672
chr19	16302060	16302350	291	16302265	13.00	10.44517	6.44313	6.70492	GR-356_Ctrl_10D_peak_1673
chr19	16435541	16435752	212	16435703	13.00	7.78829	4.81779	4.22574	GR-356_Ctrl_10D_peak_1674
chr19	16608295	16608497	203	16608381	14.00	10.21939	6.08255	6.49609	GR-356_Ctrl_10D_peak_1675
chr19	17850521	17850855	335	17850693	11.00	8.82037	5.83779	5.18096	GR-356_Ctrl_10D_peak_1676
chr19	18020259	18020813	555	18020545	38.00	49.05791	20.86808	44.23344	GR-356_Ctrl_10D_peak_1677
chr19	18629816	18630178	363	18630007	25.00	28.55578	13.91205	24.15788	GR-356_Ctrl_10D_peak_1678
chr19	18776004	18776370	367	18776036	15.00	8.83037	5.05272	5.18296	GR-356_Ctrl_10D_peak_1679
chr19	23549443	23549795	353	23549597	23.00	13.93699	6.17155	10.02573	GR-356_Ctrl_10D_peak_1680
chr19	23550186	23550428	243	23550308	19.00	7.43271	3.75008	3.89296	GR-356_Ctrl_10D_peak_1681
chr19	23554594	23554991	398	23554743	48.00	47.25257	15.47396	42.45883	GR-356_Ctrl_10D_peak_1682
chr19	32373191	32373442	252	32373344	15.00	9.61549	5.50605	5.92870	GR-356_Ctrl_10D_peak_1683
chr19	32373809	32374117	309	32374008	18.00	9.51884	4.88581	5.83557	GR-356_Ctrl_10D_peak_1684
chr19	34218285	34218542	258	34218442	18.00	15.34104	8.19154	11.37763	GR-356_Ctrl_10D_peak_1685
chr19	34275025	34275321	297	34275160	20.00	17.72624	9.05381	13.66821	GR-356_Ctrl_10D_peak_1686
chr19	34960349	34960680	332	34960437	11.00	7.76250	5.17361	4.20185	GR-356_Ctrl_10D_peak_1687
chr19	35319112	35319325	214	35319149	10.00	8.56295	5.85217	4.94652	GR-356_Ctrl_10D_peak_1688
chr19	37999621	37999823	203	37999661	20.00	8.12304	3.93758	4.53799	GR-356_Ctrl_10D_peak_1689
chr19	38209676	38209894	219	38209748	16.00	11.09999	6.16101	7.32616	GR-356_Ctrl_10D_peak_1690
chr19	38651168	38651619	452	38651353	22.00	18.30915	8.80322	14.23111	GR-356_Ctrl_10D_peak_1691
chr19	39409503	39409908	406	39409707	55.00	62.66294	20.73580	57.61057	GR-356_Ctrl_10D_peak_1692
chr19	40715605	40715871	267	40715733	28.00	22.75101	9.50041	18.52287	GR-356_Ctrl_10D_peak_1693
chr19	40832000	40832208	209	40832102	15.00	8.83037	5.05272	5.18296	GR-356_Ctrl_10D_peak_1694
chr19	42762891	42763093	203	42762990	13.00	10.44517	6.44313	6.70492	GR-356_Ctrl_10D_peak_1695
chr19	42851466	42851761	296	42851604	31.00	23.04445	8.79379	18.80540	GR-356_Ctrl_10D_peak_1696
chr19	42899460	42899846	387	42899645	22.00	19.34005	9.40924	15.22368	GR-356_Ctrl_10D_peak_1697
chr19	43003848	43004084	237	43003977	12.00	10.87226	6.91621	7.11008	GR-356_Ctrl_10D_peak_1698
chr19	43060231	43060581	351	43060383	19.00	4.79371	2.66673	1.53177	GR-356_Ctrl_10D_peak_1699
chr19	43120523	43120928	406	43120729	50.00	49.67237	15.94194	44.84044	GR-356_Ctrl_10D_peak_1700
chr19	43163804	43164006	203	43163899	14.00	9.65783	5.74123	5.96542	GR-356_Ctrl_10D_peak_1701
chr19	43182117	43182559	443	43182388	20.00	13.55309	6.63170	9.65682	GR-356_Ctrl_10D_peak_1702
chr19	43265373	43265653	281	43265426	13.00	7.11342	4.42113	3.60941	GR-356_Ctrl_10D_peak_1703
chr19	45424410	45424655	246	45424537	25.00	20.11907	8.94733	15.97394	GR-356_Ctrl_10D_peak_1704
chr19	45562761	45563120	360	45562958	11.00	8.68926	5.75569	5.06153	GR-356_Ctrl_10D_peak_1705
chr19	45568791	45569059	269	45568920	20.00	17.72624	9.05381	13.66821	GR-356_Ctrl_10D_peak_1706
chr19	45577003	45577412	410	45577239	26.00	24.16418	10.94859	19.89068	GR-356_Ctrl_10D_peak_1707
chr19	46080704	46080917	214	46080828	18.00	13.80571	7.27223	9.90112	GR-356_Ctrl_10D_peak_1708
chr19	46271831	46272036	206	46271929	14.00	7.95815	4.73693	4.37816	GR-356_Ctrl_10D_peak_1709
chr19	46300943	46301305	363	46301037	21.00	18.13681	9.00014	14.06386	GR-356_Ctrl_10D_peak_1710
chr19	46874158	46874386	229	46874299	19.00	14.90097	7.65498	10.94791	GR-356_Ctrl_10D_peak_1711
chr19	47305429	47305731	303	47305574	23.00	20.41550	9.73208	16.26382	GR-356_Ctrl_10D_peak_1712
chr19	47664261	47664463	203	47664377	17.00	12.73252	6.88948	8.87421	GR-356_Ctrl_10D_peak_1713
chr19	48485873	48486141	269	48486003	23.00	22.87104	11.19645	18.63984	GR-356_Ctrl_10D_peak_1714
chr19	49614069	49614359	291	49614263	11.00	5.51391	3.78954	2.15920	GR-356_Ctrl_10D_peak_1715
chr19	51736074	51736396	323	51736267	26.00	28.16264	13.32510	23.77859	GR-356_Ctrl_10D_peak_1716
chr19	55549476	55549715	240	55549655	13.00	10.30686	6.35734	6.57570	GR-356_Ctrl_10D_peak_1717
chr1_KI270713v1_random	21593	22089	497	21913	42.00	27.55578	8.18797	23.18710	GR-356_Ctrl_10D_peak_1718
chr2	1556843	1557050	208	1556921	15.00	11.25988	6.48805	7.47609	GR-356_Ctrl_10D_peak_1719
chr2	3470284	3470533	250	3470306	10.00	4.76356	3.47375	1.50489	GR-356_Ctrl_10D_peak_1720
chr2	9001174	9001504	331	9001368	40.00	31.85864	10.54307	27.38524	GR-356_Ctrl_10D_peak_1721
chr2	9234841	9235049	209	9234924	15.00	9.16004	5.24160	5.50222	GR-356_Ctrl_10D_peak_1722
chr2	9287667	9288650	984	9287869	43.00	44.37653	15.94615	39.63922	GR-356_Ctrl_10D_peak_1723
chr2	9640753	9640955	203	9640866	10.00	8.56295	5.85217	4.94652	GR-356_Ctrl_10D_peak_1724
chr2	9699343	9699791	449	9699540	56.00	58.39266	18.00033	53.41202	GR-356_Ctrl_10D_peak_1725
chr2	9702447	9702663	217	9702558	17.00	12.73252	6.88948	8.87421	GR-356_Ctrl_10D_peak_1726
chr2	9703312	9703703	392	9703467	22.00	13.01516	5.91440	9.14773	GR-356_Ctrl_10D_peak_1727
chr2	10270766	10271054	289	10270921	22.00	15.58957	7.26329	11.61718	GR-356_Ctrl_10D_peak_1728
chr2	10289904	10290106	203	10289972	13.00	9.78813	6.03587	6.07882	GR-356_Ctrl_10D_peak_1729
chr2	10389672	10390034	363	10389836	41.00	33.02191	10.80021	28.52013	GR-356_Ctrl_10D_peak_1730
chr2	10405394	10405725	332	10405581	32.00	32.92289	13.87658	28.42466	GR-356_Ctrl_10D_peak_1731
chr2	10406044	10406369	326	10406217	27.00	26.16161	11.77407	21.83074	GR-356_Ctrl_10D_peak_1732
chr2	10407850	10408238	389	10408026	31.00	21.70337	8.13805	17.50897	GR-356_Ctrl_10D_peak_1733
chr2	11697385	11697944	560	11697598	14.00	10.84639	6.46701	7.08551	GR-356_Ctrl_10D_peak_1734
chr2	11750947	11751155	209	11751010	19.00	7.43271	3.75008	3.89296	GR-356_Ctrl_10D_peak_1735
chr2	11899511	11899925	415	11899681	38.00	40.69304	15.95480	36.02562	GR-356_Ctrl_10D_peak_1736
chr2	12303221	12303776	556	12303410	30.00	26.03306	10.66797	21.70448	GR-356_Ctrl_10D_peak_1737
chr2	12318053	12318548	496	12318323	56.00	76.75417	28.33579	71.49023	GR-356_Ctrl_10D_peak_1738
chr2	12507360	12507574	215	12507483	12.00	9.36569	5.98290	5.68975	GR-356_Ctrl_10D_peak_1739
chr2	13682961	13683189	229	13683111	13.00	12.14649	7.49111	8.31795	GR-356_Ctrl_10D_peak_1740
chr2	15169700	15170177	478	15169995	34.00	36.35715	15.08969	31.78510	GR-356_Ctrl_10D_peak_1741
chr2	17977120	17977612	493	17977404	21.00	18.13681	9.00014	14.06386	GR-356_Ctrl_10D_peak_1742
chr2	18626270	18626713	444	18626512	25.00	23.67470	11.00088	19.41554	GR-356_Ctrl_10D_peak_1743
chr2	18829515	18829869	355	18829695	22.00	19.34005	9.40924	15.22368	GR-356_Ctrl_10D_peak_1744
chr2	18834407	18834652	246	18834506	16.00	14.78004	8.38988	10.83391	GR-356_Ctrl_10D_peak_1745
chr2	19120746	19121202	457	19121066	16.00	6.54374	3.68682	3.07554	GR-356_Ctrl_10D_peak_1746
chr2	19124142	19124344	203	19124160	11.00	7.92169	5.27361	4.34910	GR-356_Ctrl_10D_peak_1747
chr2	19235314	19235516	203	19235378	10.00	8.61749	5.88587	4.99608	GR-356_Ctrl_10D_peak_1748
chr2	19256431	19256661	231	19256499	12.00	10.53143	6.70696	6.79009	GR-356_Ctrl_10D_peak_1749
chr2	19538558	19539035	478	19538850	25.00	11.85501	4.87510	8.04458	GR-356_Ctrl_10D_peak_1750
chr2	19607569	19608279	711	19608001	42.00	39.26162	13.57919	34.62147	GR-356_Ctrl_10D_peak_1751
chr2	19611877	19612268	392	19612073	16.00	12.53334	7.01873	8.68979	GR-356_Ctrl_10D_peak_1752
chr2	19648464	19648987	524	19648860	25.00	18.78006	8.21068	14.68246	GR-356_Ctrl_10D_peak_1753
chr2	19649767	19650209	443	19650019	38.00	46.30512	19.24737	41.53006	GR-356_Ctrl_10D_peak_1754
chr2	19801467	19801719	253	19801561	28.00	16.28809	6.28929	12.28464	GR-356_Ctrl_10D_peak_1755
chr2	19898703	19898905	203	19898818	10.00	6.39642	4.48721	2.95423	GR-356_Ctrl_10D_peak_1756
chr2	19911591	19912153	563	19912024	33.00	27.96687	10.73704	23.59138	GR-356_Ctrl_10D_peak_1757
chr2	20071439	20071981	543	20071601	26.00	22.14883	9.78514	17.93335	GR-356_Ctrl_10D_peak_1758
chr2	20438649	20438988	340	20438805	74.00	94.51956	28.70616	89.02428	GR-356_Ctrl_10D_peak_1759
chr2	20540016	20540301	286	20540156	26.00	24.32971	11.04563	20.04797	GR-356_Ctrl_10D_peak_1760
chr2	20584516	20584779	264	20584655	14.00	6.37500	3.85722	2.93436	GR-356_Ctrl_10D_peak_1761
chr2	20592921	20593721	801	20593532	32.00	30.76890	12.63071	26.31952	GR-356_Ctrl_10D_peak_1762
chr2	23367772	23367998	227	23367931	16.00	10.08143	5.56920	6.36625	GR-356_Ctrl_10D_peak_1763
chr2	23602137	23602572	436	23602376	42.00	30.33422	9.32549	25.89925	GR-356_Ctrl_10D_peak_1764
chr2	24015548	24015896	349	24015724	41.00	37.96341	13.26340	33.35011	GR-356_Ctrl_10D_peak_1765
chr2	25618590	25618982	393	25618793	35.00	39.57309	16.56804	34.92853	GR-356_Ctrl_10D_peak_1766
chr2	25937136	25937338	203	25937314	12.00	10.93743	6.95603	7.17142	GR-356_Ctrl_10D_peak_1767
chr2	26704365	26704698	334	26704553	23.00	13.93699	6.17155	10.02573	GR-356_Ctrl_10D_peak_1768
chr2	26724317	26724519	203	26724333	10.00	6.41677	4.50007	2.96268	GR-356_Ctrl_10D_peak_1769
chr2	27725429	27725655	227	27725559	13.00	11.19792	6.90931	7.42110	GR-356_Ctrl_10D_peak_1770
chr2	27761588	27761868	281	27761707	16.00	13.85411	7.82380	9.94685	GR-356_Ctrl_10D_peak_1771
chr2	27776052	27776417	366	27776335	20.00	14.61480	7.22669	10.67925	GR-356_Ctrl_10D_peak_1772
chr2	27798894	27799727	834	27799117	68.00	84.60273	26.40967	79.23375	GR-356_Ctrl_10D_peak_1773
chr2	28406552	28406952	401	28406814	9.00	6.85076	4.93522	3.36332	GR-356_Ctrl_10D_peak_1774
chr2	28584022	28584381	360	28584180	20.00	16.82593	8.51557	12.80157	GR-356_Ctrl_10D_peak_1775
chr2	28614038	28614405	368	28614214	22.00	19.68225	9.61230	15.55967	GR-356_Ctrl_10D_peak_1776
chr2	28633883	28634222	340	28634073	10.00	7.88452	5.42875	4.31631	GR-356_Ctrl_10D_peak_1777
chr2	28661572	28661912	341	28661746	26.00	26.65816	12.42603	22.31889	GR-356_Ctrl_10D_peak_1778
chr2	29700665	29700922	258	29700815	12.00	10.29045	6.55814	6.56477	GR-356_Ctrl_10D_peak_1779
chr2	30106612	30106887	276	30106703	13.00	8.68610	5.35848	5.06032	GR-356_Ctrl_10D_peak_1780
chr2	30178651	30179019	369	30178843	24.00	27.07922	13.37698	22.72005	GR-356_Ctrl_10D_peak_1781
chr2	30274526	30275049	524	30274786	45.00	48.87859	17.60645	44.05718	GR-356_Ctrl_10D_peak_1782
chr2	31337970	31338172	203	31338109	13.00	9.28838	5.72736	5.61672	GR-356_Ctrl_10D_peak_1783
chr2	31360591	31360877	287	31360705	13.00	12.07600	7.44822	8.25623	GR-356_Ctrl_10D_peak_1784
chr2	33153048	33153368	321	33153186	30.00	29.57192	12.68202	25.14774	GR-356_Ctrl_10D_peak_1785
chr2	33240202	33240525	324	33240326	11.00	8.56196	5.67587	4.94652	GR-356_Ctrl_10D_peak_1786
chr2	35462566	35463073	508	35462850	41.00	37.96341	13.26340	33.35011	GR-356_Ctrl_10D_peak_1787
chr2	35548087	35548330	244	35548181	16.00	15.08545	8.57603	11.12855	GR-356_Ctrl_10D_peak_1788
chr2	36438665	36438929	265	36438792	18.00	14.53192	7.70456	10.60465	GR-356_Ctrl_10D_peak_1789
chr2	36468900	36469149	250	36469078	11.00	8.62515	5.71550	5.00334	GR-356_Ctrl_10D_peak_1790
chr2	36485547	36485854	308	36485675	23.00	13.93699	6.17155	10.02573	GR-356_Ctrl_10D_peak_1791
chr2	37376785	37377008	224	37376940	20.00	13.43072	6.56433	9.54682	GR-356_Ctrl_10D_peak_1792
chr2	37377205	37377416	212	37377341	23.00	15.31120	6.87222	11.34987	GR-356_Ctrl_10D_peak_1793
chr2	37573552	37573768	217	37573602	16.00	12.32642	6.89355	8.49305	GR-356_Ctrl_10D_peak_1794
chr2	37583395	37583729	335	37583544	26.00	16.80506	6.94299	12.78369	GR-356_Ctrl_10D_peak_1795
chr2	37590131	37590562	432	37590327	49.00	56.79936	20.27516	51.85056	GR-356_Ctrl_10D_peak_1796
chr2	37768545	37768908	364	37768737	22.00	15.58957	7.26329	11.61718	GR-356_Ctrl_10D_peak_1797
chr2	37802950	37803433	484	37803208	65.00	71.50101	20.84248	66.30984	GR-356_Ctrl_10D_peak_1798
chr2	37916708	37917026	319	37916846	11.00	5.51391	3.78954	2.15920	GR-356_Ctrl_10D_peak_1799
chr2	38076973	38077390	418	38077040	14.00	10.21939	6.08255	6.49609	GR-356_Ctrl_10D_peak_1800
chr2	38146586	38146937	352	38146698	17.00	9.30232	4.94651	5.62996	GR-356_Ctrl_10D_peak_1801
chr2	38147385	38147591	207	38147447	15.00	10.65720	6.12398	6.90103	GR-356_Ctrl_10D_peak_1802
chr2	38176812	38177197	386	38177010	21.00	14.56176	6.94749	10.62918	GR-356_Ctrl_10D_peak_1803
chr2	38179092	38179558	467	38179324	36.00	39.94747	16.36573	35.30091	GR-356_Ctrl_10D_peak_1804
chr2	38396118	38396371	254	38396244	11.00	7.34068	4.90917	3.80450	GR-356_Ctrl_10D_peak_1805
chr2	38720553	38720806	254	38720697	26.00	16.80506	6.94299	12.78369	GR-356_Ctrl_10D_peak_1806
chr2	39523662	39524441	780	39523845	43.00	35.37877	11.31451	30.82545	GR-356_Ctrl_10D_peak_1807
chr2	41926654	41927066	413	41926825	41.00	43.11445	16.07545	38.40230	GR-356_Ctrl_10D_peak_1808
chr2	42342576	42342839	264	42342706	12.00	8.75946	5.60474	5.12077	GR-356_Ctrl_10D_peak_1809
chr2	42922874	42923134	261	42923048	16.00	9.72846	5.36852	6.02673	GR-356_Ctrl_10D_peak_1810
chr2	42924836	42925140	305	42925022	17.00	9.68928	5.15416	5.99608	GR-356_Ctrl_10D_peak_1811
chr2	42954546	42954832	287	42954654	36.00	31.63035	11.68442	27.16101	GR-356_Ctrl_10D_peak_1812
chr2	43047037	43047311	275	43047202	14.00	10.30761	6.13646	6.57570	GR-356_Ctrl_10D_peak_1813
chr2	43050392	43050594	203	43050536	12.00	9.36569	5.98290	5.68975	GR-356_Ctrl_10D_peak_1814
chr2	43075119	43075336	218	43075181	17.00	11.54664	6.19431	7.75095	GR-356_Ctrl_10D_peak_1815
chr2	43086437	43086799	363	43086637	38.00	29.56363	10.02877	25.14299	GR-356_Ctrl_10D_peak_1816
chr2	43131102	43131768	667	43131587	26.00	24.16418	10.94859	19.89068	GR-356_Ctrl_10D_peak_1817
chr2	43269796	43270036	241	43269837	16.00	13.04442	7.32928	9.17460	GR-356_Ctrl_10D_peak_1818
chr2	43455746	43456126	381	43455900	34.00	29.17595	11.05283	24.77007	GR-356_Ctrl_10D_peak_1819
chr2	44958903	44959169	267	44959016	16.00	7.89826	4.37151	4.32601	GR-356_Ctrl_10D_peak_1820
chr2	44959917	44960305	389	44960112	32.00	39.31908	17.65761	34.67665	GR-356_Ctrl_10D_peak_1821
chr2	45128626	45128881	256	45128741	22.00	18.30915	8.80322	14.23111	GR-356_Ctrl_10D_peak_1822
chr2	45238202	45238647	446	45238440	42.00	38.99736	13.44125	34.36911	GR-356_Ctrl_10D_peak_1823
chr2	45821877	45822434	558	45822083	51.00	36.63741	9.75021	32.05521	GR-356_Ctrl_10D_peak_1824
chr2	45938773	45939094	322	45938965	30.00	24.41639	9.78965	20.12776	GR-356_Ctrl_10D_peak_1825
chr2	46067871	46068138	268	46068013	14.00	10.30761	6.13646	6.57570	GR-356_Ctrl_10D_peak_1826
chr2	46315372	46315667	296	46315486	23.00	16.63569	7.57908	12.62046	GR-356_Ctrl_10D_peak_1827
chr2	46855372	46855780	409	46855567	24.00	23.94887	11.50558	19.68544	GR-356_Ctrl_10D_peak_1828
chr2	46909614	46909965	352	46909743	22.00	22.31120	11.18910	18.09388	GR-356_Ctrl_10D_peak_1829
chr2	46914094	46914352	259	46914206	15.00	8.83037	5.05272	5.18296	GR-356_Ctrl_10D_peak_1830
chr2	47034093	47034457	365	47034243	27.00	19.42272	8.01759	15.30470	GR-356_Ctrl_10D_peak_1831
chr2	47076766	47077280	515	47077093	14.00	10.30761	6.13646	6.57570	GR-356_Ctrl_10D_peak_1832
chr2	47119101	47119424	324	47119272	19.00	17.28331	9.08191	13.24108	GR-356_Ctrl_10D_peak_1833
chr2	47176457	47176765	309	47176623	12.00	8.29870	5.31827	4.69290	GR-356_Ctrl_10D_peak_1834
chr2	47191926	47192175	250	47192043	16.00	12.42749	6.95465	8.58616	GR-356_Ctrl_10D_peak_1835
chr2	47199192	47199458	267	47199308	20.00	11.10918	5.34060	7.33516	GR-356_Ctrl_10D_peak_1836
chr2	47269671	47270100	430	47269910	15.00	8.35106	4.78224	4.73985	GR-356_Ctrl_10D_peak_1837
chr2	48344193	48344445	253	48344327	19.00	11.94822	5.97779	8.13198	GR-356_Ctrl_10D_peak_1838
chr2	48699604	48699844	241	48699742	19.00	10.36255	5.14296	6.62581	GR-356_Ctrl_10D_peak_1839
chr2	48738941	48739143	203	48739045	13.00	9.28838	5.72736	5.61672	GR-356_Ctrl_10D_peak_1840
chr2	48852920	48853136	217	48853104	11.00	8.62515	5.71550	5.00334	GR-356_Ctrl_10D_peak_1841
chr2	52658660	52658982	323	52658835	12.00	8.29870	5.31827	4.69290	GR-356_Ctrl_10D_peak_1842
chr2	55015528	55015789	262	55015721	16.00	11.68258	6.50673	7.87434	GR-356_Ctrl_10D_peak_1843
chr2	55102105	55102316	212	55102239	18.00	9.77696	5.01910	6.07076	GR-356_Ctrl_10D_peak_1844
chr2	55779632	55779966	335	55779793	25.00	15.83259	6.68585	11.84545	GR-356_Ctrl_10D_peak_1845
chr2	55992511	55992895	385	55992710	30.00	24.41639	9.78965	20.12776	GR-356_Ctrl_10D_peak_1846
chr2	55995303	55995588	286	55995402	12.00	9.43083	6.02355	5.75371	GR-356_Ctrl_10D_peak_1847
chr2	56741681	56741981	301	56741809	11.00	8.31799	5.52268	4.70885	GR-356_Ctrl_10D_peak_1848
chr2	61255465	61255858	394	61255660	38.00	34.13094	12.31601	29.60455	GR-356_Ctrl_10D_peak_1849
chr2	63788075	63788420	346	63788246	32.00	28.49814	11.35623	24.10143	GR-356_Ctrl_10D_peak_1850
chr2	63792580	63792931	352	63792766	23.00	13.93699	6.17155	10.02573	GR-356_Ctrl_10D_peak_1851
chr2	64404113	64404356	244	64404229	26.00	16.80506	6.94299	12.78369	GR-356_Ctrl_10D_peak_1852
chr2	65576958	65577160	203	65577027	21.00	10.27760	4.77118	6.55237	GR-356_Ctrl_10D_peak_1853
chr2	67561611	67561936	326	67561783	26.00	28.16264	13.32510	23.77859	GR-356_Ctrl_10D_peak_1854
chr2	68829033	68829363	331	68829132	18.00	9.51884	4.88581	5.83557	GR-356_Ctrl_10D_peak_1855
chr2	68971724	68972244	521	68972105	27.00	20.98960	8.84227	16.81438	GR-356_Ctrl_10D_peak_1856
chr2	71717025	71717339	315	71717223	36.00	31.63035	11.68442	27.16101	GR-356_Ctrl_10D_peak_1857
chr2	72539232	72539512	281	72539390	21.00	21.22910	10.85749	17.04897	GR-356_Ctrl_10D_peak_1858
chr2	73932185	73932524	340	73932331	32.00	22.95109	8.48588	18.71434	GR-356_Ctrl_10D_peak_1859
chr2	74560584	74560790	207	74560662	12.00	10.93743	6.95603	7.17142	GR-356_Ctrl_10D_peak_1860
chr2	74845301	74845564	264	74845472	18.00	11.59671	6.00011	7.79238	GR-356_Ctrl_10D_peak_1861
chr2	82795616	82795984	369	82795805	19.00	15.66840	8.11006	11.69225	GR-356_Ctrl_10D_peak_1862
chr2	84904740	84904958	219	84904848	12.00	8.53744	5.46653	4.92331	GR-356_Ctrl_10D_peak_1863
chr2	84958073	84958932	860	84958666	103.00	94.99613	17.17469	89.49440	GR-356_Ctrl_10D_peak_1864
chr2	85437590	85437842	253	85437744	16.00	13.85411	7.82380	9.94685	GR-356_Ctrl_10D_peak_1865
chr2	85708698	85708925	228	85708790	15.00	14.24963	8.31763	10.33159	GR-356_Ctrl_10D_peak_1866
chr2	85772146	85772770	625	85772342	52.00	52.75772	16.73714	47.86882	GR-356_Ctrl_10D_peak_1867
chr2	85924481	85924833	353	85924639	35.00	40.55118	17.14650	35.89063	GR-356_Ctrl_10D_peak_1868
chr2	91820159	91820485	327	91820431	13.00	8.21603	5.07378	4.62604	GR-356_Ctrl_10D_peak_1869
chr2	94262912	94263114	203	94262954	17.00	7.24685	3.90370	3.73324	GR-356_Ctrl_10D_peak_1870
chr2	94577274	94577578	305	94577453	20.00	19.89701	10.36397	15.75988	GR-356_Ctrl_10D_peak_1871
chr2	94583270	94583779	510	94583576	70.00	79.01691	22.42146	73.72186	GR-356_Ctrl_10D_peak_1872
chr2	95315917	95316442	526	95316197	132.00	199.26357	50.90559	192.73575	GR-356_Ctrl_10D_peak_1873
chr2	95316816	95317345	530	95317075	25.00	18.78006	8.21068	14.68246	GR-356_Ctrl_10D_peak_1874
chr2	98379169	98379402	234	98379254	12.00	8.29870	5.31827	4.69290	GR-356_Ctrl_10D_peak_1875
chr2	98865117	98865618	502	98865506	18.00	15.34104	8.19154	11.37763	GR-356_Ctrl_10D_peak_1876
chr2	98911711	98912190	480	98911942	34.00	39.03572	16.67021	34.40583	GR-356_Ctrl_10D_peak_1877
chr2	98912460	98912780	321	98912691	11.00	8.31799	5.52268	4.70885	GR-356_Ctrl_10D_peak_1878
chr2	98913335	98913664	330	98913533	23.00	21.45270	10.34721	17.26322	GR-356_Ctrl_10D_peak_1879
chr2	98916968	98917363	396	98917146	38.00	37.48599	14.13409	32.89347	GR-356_Ctrl_10D_peak_1880
chr2	99609881	99610174	294	99610021	11.00	9.46368	6.23822	5.78603	GR-356_Ctrl_10D_peak_1881
chr2	100752645	100753263	619	100752814	38.00	42.17255	16.81422	37.47504	GR-356_Ctrl_10D_peak_1882
chr2	100786300	100786513	214	100786409	19.00	11.48192	5.72685	7.69008	GR-356_Ctrl_10D_peak_1883
chr2	101120445	101120983	539	101120782	78.00	104.95556	32.31869	99.32941	GR-356_Ctrl_10D_peak_1884
chr2	101124894	101125327	434	101125161	25.00	17.95786	7.77113	13.89315	GR-356_Ctrl_10D_peak_1885
chr2	101447094	101447350	257	101447155	15.00	10.11215	5.79860	6.39343	GR-356_Ctrl_10D_peak_1886
chr2	101517251	101517678	428	101517423	38.00	34.13094	12.31601	29.60455	GR-356_Ctrl_10D_peak_1887
chr2	101736912	101737150	239	101736987	17.00	13.41753	7.29906	9.53508	GR-356_Ctrl_10D_peak_1888
chr2	102027242	102027800	559	102027636	20.00	16.82593	8.51557	12.80157	GR-356_Ctrl_10D_peak_1889
chr2	102048485	102048790	306	102048645	24.00	27.07922	13.37698	22.72005	GR-356_Ctrl_10D_peak_1890
chr2	102062368	102062707	340	102062508	14.00	12.91281	7.73879	9.05064	GR-356_Ctrl_10D_peak_1891
chr2	102064086	102064556	471	102064350	55.00	61.86346	20.29510	56.82215	GR-356_Ctrl_10D_peak_1892
chr2	102082995	102083283	289	102083134	18.00	17.07377	9.24317	13.04173	GR-356_Ctrl_10D_peak_1893
chr2	105375180	105375478	299	105375322	29.00	23.25980	9.47386	19.00767	GR-356_Ctrl_10D_peak_1894
chr2	105376729	105377039	311	105376917	25.00	22.89809	10.54308	18.66389	GR-356_Ctrl_10D_peak_1895
chr2	105391012	105391243	232	105391070	18.00	12.54767	6.53844	8.70243	GR-356_Ctrl_10D_peak_1896
chr2	105396698	105397076	379	105396983	20.00	13.43072	6.56433	9.54682	GR-356_Ctrl_10D_peak_1897
chr2	105404038	105404412	375	105404224	18.00	16.06094	8.62782	12.06288	GR-356_Ctrl_10D_peak_1898
chr2	108412903	108413434	532	108413083	44.00	49.50525	18.40938	44.67519	GR-356_Ctrl_10D_peak_1899
chr2	109125579	109125864	286	109125744	14.00	11.55428	6.90335	7.75638	GR-356_Ctrl_10D_peak_1900
chr2	109173677	109174022	346	109173879	22.00	23.90026	12.14166	19.63901	GR-356_Ctrl_10D_peak_1901
chr2	109214218	109214443	226	109214383	13.00	9.28838	5.72736	5.61672	GR-356_Ctrl_10D_peak_1902
chr2	109322045	109322570	526	109322305	58.00	70.46992	23.64356	65.29520	GR-356_Ctrl_10D_peak_1903
chr2	109324705	109325186	482	109324993	42.00	34.19537	11.05736	29.66572	GR-356_Ctrl_10D_peak_1904
chr2	109330147	109330545	399	109330285	15.00	12.85513	7.46430	8.99457	GR-356_Ctrl_10D_peak_1905
chr2	109702401	109702713	313	109702568	15.00	10.65720	6.12398	6.90103	GR-356_Ctrl_10D_peak_1906
chr2	110016768	110017100	333	110016961	37.00	30.70132	10.88101	26.25991	GR-356_Ctrl_10D_peak_1907
chr2	110354236	110354662	427	110354419	30.00	29.57192	12.68202	25.14774	GR-356_Ctrl_10D_peak_1908
chr2	111160976	111161325	350	111161156	18.00	14.53192	7.70456	10.60465	GR-356_Ctrl_10D_peak_1909
chr2	111407824	111408050	227	111407894	14.00	9.15029	5.43619	5.49398	GR-356_Ctrl_10D_peak_1910
chr2	111622836	111623100	265	111622924	16.00	12.32642	6.89355	8.49305	GR-356_Ctrl_10D_peak_1911
chr2	112631144	112631469	326	112631278	15.00	14.65187	8.56126	10.70843	GR-356_Ctrl_10D_peak_1912
chr2	112644264	112644695	432	112644510	23.00	16.63569	7.57908	12.62046	GR-356_Ctrl_10D_peak_1913
chr2	112794255	112794557	303	112794435	22.00	16.76213	7.91495	12.74396	GR-356_Ctrl_10D_peak_1914
chr2	113240868	113241382	515	113241095	63.00	68.53967	20.21089	63.39368	GR-356_Ctrl_10D_peak_1915
chr2	113253437	113253768	332	113253624	31.00	36.49112	16.38549	31.91450	GR-356_Ctrl_10D_peak_1916
chr2	113283901	113284351	451	113284000	14.00	10.84639	6.46701	7.08551	GR-356_Ctrl_10D_peak_1917
chr2	118112940	118113142	203	118113056	13.00	9.78813	6.03587	6.07882	GR-356_Ctrl_10D_peak_1918
chr2	118123610	118124001	392	118123772	22.00	22.58042	11.35101	18.35768	GR-356_Ctrl_10D_peak_1919
chr2	118242425	118242667	243	118242553	18.00	14.53192	7.70456	10.60465	GR-356_Ctrl_10D_peak_1920
chr2	118668759	118669130	372	118668943	19.00	15.78879	8.18195	11.80509	GR-356_Ctrl_10D_peak_1921
chr2	118914050	118914281	232	118914160	16.00	12.32642	6.89355	8.49305	GR-356_Ctrl_10D_peak_1922
chr2	119208767	119209136	370	119208944	21.00	10.27760	4.77118	6.55237	GR-356_Ctrl_10D_peak_1923
chr2	119255884	119256134	251	119255942	13.00	7.03593	4.37622	3.54144	GR-356_Ctrl_10D_peak_1924
chr2	119756959	119757237	279	119757138	16.00	7.89826	4.37151	4.32601	GR-356_Ctrl_10D_peak_1925
chr2	120104019	120104431	413	120104211	32.00	26.77034	10.42124	22.42191	GR-356_Ctrl_10D_peak_1926
chr2	120108069	120108302	234	120108225	18.00	11.59671	6.00011	7.79238	GR-356_Ctrl_10D_peak_1927
chr2	120540479	120540681	203	120540618	13.00	12.14649	7.49111	8.31795	GR-356_Ctrl_10D_peak_1928
chr2	120559466	120559671	206	120559573	15.00	8.83037	5.05272	5.18296	GR-356_Ctrl_10D_peak_1929
chr2	120722801	120723035	235	120722912	19.00	12.56442	6.31590	8.71315	GR-356_Ctrl_10D_peak_1930
chr2	121197346	121197972	627	121197606	47.00	54.04313	19.63667	49.13732	GR-356_Ctrl_10D_peak_1931
chr2	121386793	121387064	272	121386880	18.00	16.25263	8.74424	12.25068	GR-356_Ctrl_10D_peak_1932
chr2	121387713	121388076	364	121387856	25.00	18.78006	8.21068	14.68246	GR-356_Ctrl_10D_peak_1933
chr2	121501060	121501397	338	121501223	43.00	50.53106	19.46194	45.68275	GR-356_Ctrl_10D_peak_1934
chr2	121502175	121502804	630	121502421	163.00	260.17496	62.77081	253.17238	GR-356_Ctrl_10D_peak_1935
chr2	121505059	121505369	311	121505196	25.00	21.88306	9.95147	17.68093	GR-356_Ctrl_10D_peak_1936
chr2	121722343	121722796	454	121722625	29.00	23.25980	9.47386	19.00767	GR-356_Ctrl_10D_peak_1937
chr2	122236515	122236750	236	122236624	17.00	14.18108	7.76041	10.26550	GR-356_Ctrl_10D_peak_1938
chr2	122341050	122341321	272	122341242	13.00	9.20658	5.67704	5.54393	GR-356_Ctrl_10D_peak_1939
chr2	127080842	127081335	494	127081044	46.00	61.11183	24.24822	56.08561	GR-356_Ctrl_10D_peak_1940
chr2	127143975	127144240	266	127144083	15.00	11.25988	6.48805	7.47609	GR-356_Ctrl_10D_peak_1941
chr2	127599350	127599598	249	127599454	11.00	7.34068	4.90917	3.80450	GR-356_Ctrl_10D_peak_1942
chr2	128584611	128584874	264	128584719	14.00	11.55428	6.90335	7.75638	GR-356_Ctrl_10D_peak_1943
chr2	133287634	133288028	395	133287816	10.00	6.41677	4.50007	2.96268	GR-356_Ctrl_10D_peak_1944
chr2	133346758	133347002	245	133346927	14.00	13.30945	7.98024	9.43483	GR-356_Ctrl_10D_peak_1945
chr2	137179562	137179940	379	137179695	16.00	7.89826	4.37151	4.32601	GR-356_Ctrl_10D_peak_1946
chr2	143955375	143955732	358	143955615	27.00	17.79320	7.20014	13.73126	GR-356_Ctrl_10D_peak_1947
chr2	144099829	144100033	205	144099934	12.00	10.61446	6.75807	6.86841	GR-356_Ctrl_10D_peak_1948
chr2	144320554	144320839	286	144320717	13.00	11.19792	6.90931	7.42110	GR-356_Ctrl_10D_peak_1949
chr2	144553219	144553854	636	144553416	32.00	35.14773	15.18737	30.59963	GR-356_Ctrl_10D_peak_1950
chr2	144659707	144660302	596	144660011	53.00	63.35583	22.09126	58.29219	GR-356_Ctrl_10D_peak_1951
chr2	145751561	145751941	381	145751751	34.00	33.43055	13.39621	28.92379	GR-356_Ctrl_10D_peak_1952
chr2	146262591	146262916	326	146262735	16.00	15.94465	9.09634	11.95197	GR-356_Ctrl_10D_peak_1953
chr2	150133651	150133980	330	150133793	33.00	27.96687	10.73704	23.59138	GR-356_Ctrl_10D_peak_1954
chr2	150167712	150167914	203	150167791	13.00	9.28838	5.72736	5.61672	GR-356_Ctrl_10D_peak_1955
chr2	150409249	150409618	370	150409441	35.00	43.69484	19.00434	38.97058	GR-356_Ctrl_10D_peak_1956
chr2	150410925	150411141	217	150411017	14.00	9.65783	5.74123	5.96542	GR-356_Ctrl_10D_peak_1957
chr2	150586822	150587078	257	150586974	14.00	13.30945	7.98024	9.43483	GR-356_Ctrl_10D_peak_1958
chr2	157173746	157174005	260	157173874	13.00	11.19792	6.90931	7.42110	GR-356_Ctrl_10D_peak_1959
chr2	158688930	158689151	222	158688994	10.00	8.07639	5.54920	4.49232	GR-356_Ctrl_10D_peak_1960
chr2	158936870	158937277	408	158937077	30.00	33.99772	15.29919	29.47650	GR-356_Ctrl_10D_peak_1961
chr2	159091450	159091743	294	159091600	15.00	11.35453	6.54556	7.56438	GR-356_Ctrl_10D_peak_1962
chr2	159946384	159946683	300	159946561	17.00	8.69704	4.62866	5.06540	GR-356_Ctrl_10D_peak_1963
chr2	160208108	160208310	203	160208237	14.00	10.30761	6.13646	6.57570	GR-356_Ctrl_10D_peak_1964
chr2	160228617	160229001	385	160228803	56.00	46.36322	12.36170	41.58686	GR-356_Ctrl_10D_peak_1965
chr2	160368021	160368418	398	160368219	39.00	45.22206	18.16383	40.46650	GR-356_Ctrl_10D_peak_1966
chr2	160417794	160418139	346	160417990	15.00	13.55932	7.89636	9.66147	GR-356_Ctrl_10D_peak_1967
chr2	160869535	160869781	247	160869625	15.00	11.25988	6.48805	7.47609	GR-356_Ctrl_10D_peak_1968
chr2	163604848	163605050	203	163604971	12.00	7.31121	4.71136	3.78466	GR-356_Ctrl_10D_peak_1969
chr2	163659210	163659545	336	163659363	36.00	21.40624	6.93765	17.21871	GR-356_Ctrl_10D_peak_1970
chr2	163667531	163667825	295	163667654	18.00	18.24731	9.95304	14.17157	GR-356_Ctrl_10D_peak_1971
chr2	168545685	168546164	480	168545971	24.00	14.87636	6.42870	10.92602	GR-356_Ctrl_10D_peak_1972
chr2	172253218	172253507	290	172253373	19.00	15.66840	8.11006	11.69225	GR-356_Ctrl_10D_peak_1973
chr2	172450034	172450236	203	172450139	8.00	5.85765	4.44170	2.46726	GR-356_Ctrl_10D_peak_1974
chr2	172655192	172655513	322	172655386	11.00	9.38745	6.19104	5.71098	GR-356_Ctrl_10D_peak_1975
chr2	172783149	172783462	314	172783291	21.00	15.03150	7.20720	11.07672	GR-356_Ctrl_10D_peak_1976
chr2	173428366	173428571	206	173428410	11.00	9.76027	6.42095	6.05470	GR-356_Ctrl_10D_peak_1977
chr2	174606325	174606542	218	174606436	24.00	14.87636	6.42870	10.92602	GR-356_Ctrl_10D_peak_1978
chr2	174778459	174778877	419	174778675	21.00	18.94946	9.48495	14.84561	GR-356_Ctrl_10D_peak_1979
chr2	174836579	174836925	347	174836707	24.00	22.73116	10.77835	18.50370	GR-356_Ctrl_10D_peak_1980
chr2	179104786	179105026	241	179104852	18.00	11.59671	6.00011	7.79238	GR-356_Ctrl_10D_peak_1981
chr2	182372709	182372911	203	182372771	11.00	7.34068	4.90917	3.80450	GR-356_Ctrl_10D_peak_1982
chr2	182616942	182617276	335	182617112	13.00	12.14649	7.49111	8.31795	GR-356_Ctrl_10D_peak_1983
chr2	182916523	182916801	279	182916641	20.00	16.95276	8.59104	12.92164	GR-356_Ctrl_10D_peak_1984
chr2	187541750	187542108	359	187541950	43.00	40.56979	13.89499	35.90549	GR-356_Ctrl_10D_peak_1985
chr2	189350611	189350832	222	189350736	14.00	10.84639	6.46701	7.08551	GR-356_Ctrl_10D_peak_1986
chr2	189411981	189412183	203	189412115	19.00	12.44848	6.25174	8.60573	GR-356_Ctrl_10D_peak_1987
chr2	189933953	189934308	356	189934111	22.00	21.07303	10.44420	16.89606	GR-356_Ctrl_10D_peak_1988
chr2	191171767	191172110	344	191171912	19.00	15.66840	8.11006	11.69225	GR-356_Ctrl_10D_peak_1989
chr2	191334165	191334434	270	191334295	16.00	12.42749	6.95465	8.58616	GR-356_Ctrl_10D_peak_1990
chr2	191637513	191637937	425	191637600	27.00	13.46549	5.25011	9.58075	GR-356_Ctrl_10D_peak_1991
chr2	191866901	191867354	454	191867099	29.00	23.25980	9.47386	19.00767	GR-356_Ctrl_10D_peak_1992
chr2	191894792	191895260	469	191895095	31.00	33.36716	14.53106	28.86238	GR-356_Ctrl_10D_peak_1993
chr2	193824401	193824852	452	193824659	25.00	28.55578	13.91205	24.15788	GR-356_Ctrl_10D_peak_1994
chr2	193833972	193834202	231	193834089	16.00	13.85411	7.82380	9.94685	GR-356_Ctrl_10D_peak_1995
chr2	195319145	195319423	279	195319289	23.00	16.63569	7.57908	12.62046	GR-356_Ctrl_10D_peak_1996
chr2	200172831	200173154	324	200172925	20.00	16.82593	8.51557	12.80157	GR-356_Ctrl_10D_peak_1997
chr2	200300950	200301259	310	200301111	20.00	11.22712	5.40011	7.44680	GR-356_Ctrl_10D_peak_1998
chr2	200367171	200367472	302	200367274	15.00	11.35453	6.54556	7.56438	GR-356_Ctrl_10D_peak_1999
chr2	200624831	200625033	203	200624926	13.00	7.11342	4.42113	3.60941	GR-356_Ctrl_10D_peak_2000
chr2	200662789	200662991	203	200662900	16.00	9.72846	5.36852	6.02673	GR-356_Ctrl_10D_peak_2001
chr2	201123987	201124296	310	201124142	32.00	32.27741	13.50021	27.79223	GR-356_Ctrl_10D_peak_2002
chr2	201126905	201127107	203	201126986	15.00	8.83037	5.05272	5.18296	GR-356_Ctrl_10D_peak_2003
chr2	201149150	201149484	335	201149285	24.00	19.79094	9.06031	15.66491	GR-356_Ctrl_10D_peak_2004
chr2	201151269	201151828	560	201151673	16.00	12.42749	6.95465	8.58616	GR-356_Ctrl_10D_peak_2005
chr2	201798273	201798557	285	201798442	24.00	17.55129	7.81468	13.50081	GR-356_Ctrl_10D_peak_2006
chr2	201854399	201855025	627	201854575	32.00	34.97586	15.08559	30.43323	GR-356_Ctrl_10D_peak_2007
chr2	203403899	203404135	237	203404029	11.00	9.31250	6.14456	5.63976	GR-356_Ctrl_10D_peak_2008
chr2	203730410	203730626	217	203730482	11.00	9.76027	6.42095	6.05470	GR-356_Ctrl_10D_peak_2009
chr2	203743684	203743901	218	203743775	15.00	7.12379	4.11437	3.61532	GR-356_Ctrl_10D_peak_2010
chr2	203783989	203784191	203	203784069	13.00	9.28838	5.72736	5.61672	GR-356_Ctrl_10D_peak_2011
chr2	203804153	203804475	323	203804312	20.00	15.79004	7.90466	11.80626	GR-356_Ctrl_10D_peak_2012
chr2	203811436	203811890	455	203811750	45.00	47.20258	16.67097	42.41270	GR-356_Ctrl_10D_peak_2013
chr2	206213367	206213647	281	206213534	15.00	8.83037	5.05272	5.18296	GR-356_Ctrl_10D_peak_2014
chr2	207133829	207134399	571	207134128	27.00	25.61799	11.45473	21.29588	GR-356_Ctrl_10D_peak_2015
chr2	207239174	207239584	411	207239407	60.00	64.14838	19.26351	59.07038	GR-356_Ctrl_10D_peak_2016
chr2	207240759	207240990	232	207240854	15.00	7.12379	4.11437	3.61532	GR-356_Ctrl_10D_peak_2017
chr2	207258480	207258893	414	207258581	13.00	8.68610	5.35848	5.06032	GR-356_Ctrl_10D_peak_2018
chr2	207394859	207395266	408	207395072	27.00	20.82214	8.75244	16.65837	GR-356_Ctrl_10D_peak_2019
chr2	207684187	207684401	215	207684337	11.00	8.95550	5.92227	5.30388	GR-356_Ctrl_10D_peak_2020
chr2	209368941	209369173	233	209369097	15.00	9.16004	5.24160	5.50222	GR-356_Ctrl_10D_peak_2021
chr2	209495819	209496230	412	209496077	29.00	23.25980	9.47386	19.00767	GR-356_Ctrl_10D_peak_2022
chr2	211408464	211408756	293	211408570	19.00	19.86347	10.64032	15.73355	GR-356_Ctrl_10D_peak_2023
chr2	212842765	212843141	377	212842988	25.00	18.78006	8.21068	14.68246	GR-356_Ctrl_10D_peak_2024
chr2	213239019	213239298	280	213239145	29.00	11.99148	4.42633	8.17437	GR-356_Ctrl_10D_peak_2025
chr2	215460637	215461154	518	215460891	68.00	67.67997	17.74321	62.54818	GR-356_Ctrl_10D_peak_2026
chr2	215465339	215465553	215	215465480	15.00	9.16004	5.24160	5.50222	GR-356_Ctrl_10D_peak_2027
chr2	215528477	215528910	434	215528671	68.00	61.30214	14.96417	56.26955	GR-356_Ctrl_10D_peak_2028
chr2	215728378	215728911	534	215728661	34.00	35.03465	14.31841	30.48792	GR-356_Ctrl_10D_peak_2029
chr2	215843637	215843986	350	215843785	26.00	24.16418	10.94859	19.89068	GR-356_Ctrl_10D_peak_2030
chr2	216372857	216373059	203	216373035	11.00	5.51391	3.78954	2.15920	GR-356_Ctrl_10D_peak_2031
chr2	216535437	216535792	356	216535610	41.00	41.58947	15.22133	36.90856	GR-356_Ctrl_10D_peak_2032
chr2	217687840	217688052	213	217687939	13.00	12.07600	7.44822	8.25623	GR-356_Ctrl_10D_peak_2033
chr2	219125197	219125522	326	219125350	31.00	21.89208	8.22873	17.68758	GR-356_Ctrl_10D_peak_2034
chr2	219452667	219452903	237	219452773	14.00	11.86466	7.09483	8.05383	GR-356_Ctrl_10D_peak_2035
chr2	219689110	219689387	278	219689245	23.00	17.15222	7.86240	13.11785	GR-356_Ctrl_10D_peak_2036
chr2	219722471	219722717	247	219722589	16.00	14.78004	8.38988	10.83391	GR-356_Ctrl_10D_peak_2037
chr2	222452443	222452884	442	222452645	72.00	94.61173	29.86411	89.11558	GR-356_Ctrl_10D_peak_2038
chr2	222756928	222757453	526	222757201	51.00	60.21811	21.27306	55.20530	GR-356_Ctrl_10D_peak_2039
chr2	222787949	222788416	468	222788244	18.00	16.25263	8.74424	12.25068	GR-356_Ctrl_10D_peak_2040
chr2	223699404	223699860	457	223699638	28.00	31.05078	14.31215	26.59171	GR-356_Ctrl_10D_peak_2041
chr2	224869823	224870034	212	224869861	11.00	9.09488	6.00923	5.44151	GR-356_Ctrl_10D_peak_2042
chr2	225010798	225011000	203	225010889	18.00	13.80571	7.27223	9.90112	GR-356_Ctrl_10D_peak_2043
chr2	226115215	226115430	216	226115343	14.00	7.95815	4.73693	4.37816	GR-356_Ctrl_10D_peak_2044
chr2	226211480	226211760	281	226211639	18.00	14.53192	7.70456	10.60465	GR-356_Ctrl_10D_peak_2045
chr2	226426475	226426731	257	226426583	16.00	12.42749	6.95465	8.58616	GR-356_Ctrl_10D_peak_2046
chr2	226583599	226583924	326	226583769	36.00	26.36935	9.07140	22.03370	GR-356_Ctrl_10D_peak_2047
chr2	227818132	227818745	614	227818414	103.00	137.70227	35.78933	131.71669	GR-356_Ctrl_10D_peak_2048
chr2	227818832	227819147	316	227818964	15.00	10.11215	5.79860	6.39343	GR-356_Ctrl_10D_peak_2049
chr2	229407195	229407501	307	229407359	21.00	20.72247	10.55210	16.56002	GR-356_Ctrl_10D_peak_2050
chr2	229408533	229408735	203	229408680	11.00	7.34068	4.90917	3.80450	GR-356_Ctrl_10D_peak_2051
chr2	229444939	229445141	203	229445093	16.00	9.21498	5.08113	5.55103	GR-356_Ctrl_10D_peak_2052
chr2	229586102	229586377	276	229586265	19.00	18.58504	9.87045	14.50188	GR-356_Ctrl_10D_peak_2053
chr2	229610363	229610800	438	229610652	21.00	18.00353	8.92107	13.93598	GR-356_Ctrl_10D_peak_2054
chr2	229921690	229922182	493	229922008	14.00	13.10774	7.85766	9.23753	GR-356_Ctrl_10D_peak_2055
chr2	230097944	230098150	207	230098067	15.00	12.69114	7.36357	8.83583	GR-356_Ctrl_10D_peak_2056
chr2	230220147	230220454	308	230220293	27.00	20.98960	8.84227	16.81438	GR-356_Ctrl_10D_peak_2057
chr2	230667557	230667781	225	230667683	13.00	9.20658	5.67704	5.54393	GR-356_Ctrl_10D_peak_2058
chr2	230794022	230794276	255	230794183	16.00	10.08143	5.56920	6.36625	GR-356_Ctrl_10D_peak_2059
chr2	233486927	233487511	585	233487312	30.00	28.15899	11.86521	23.77612	GR-356_Ctrl_10D_peak_2060
chr2	233974664	233974898	235	233974858	12.00	4.96098	3.34292	1.67862	GR-356_Ctrl_10D_peak_2061
chr2	233982464	233982729	266	233982566	17.00	13.41753	7.29906	9.53508	GR-356_Ctrl_10D_peak_2062
chr2	234111586	234111895	310	234111759	21.00	18.13681	9.00014	14.06386	GR-356_Ctrl_10D_peak_2063
chr2	234203352	234203600	249	234203507	14.00	6.37500	3.85722	2.93436	GR-356_Ctrl_10D_peak_2064
chr2	234249971	234250332	362	234250082	14.00	7.95815	4.73693	4.37816	GR-356_Ctrl_10D_peak_2065
chr2	234680093	234680351	259	234680288	13.00	9.28838	5.72736	5.61672	GR-356_Ctrl_10D_peak_2066
chr2	234880530	234880801	272	234880684	15.00	14.57073	8.51225	10.63709	GR-356_Ctrl_10D_peak_2067
chr2	234949773	234950051	279	234949852	15.00	7.12379	4.11437	3.61532	GR-356_Ctrl_10D_peak_2068
chr2	234989065	234989514	450	234989216	33.00	27.96687	10.73704	23.59138	GR-356_Ctrl_10D_peak_2069
chr2	235021669	235022119	451	235021924	53.00	54.15467	17.05294	49.24373	GR-356_Ctrl_10D_peak_2070
chr2	235394576	235394791	216	235394686	18.00	11.59671	6.00011	7.79238	GR-356_Ctrl_10D_peak_2071
chr2	235605711	235605913	203	235605813	20.00	18.73982	9.66469	14.64792	GR-356_Ctrl_10D_peak_2072
chr2	235709259	235709647	389	235709296	10.00	8.20957	5.63251	4.62240	GR-356_Ctrl_10D_peak_2073
chr2	236744277	236744518	242	236744425	15.00	8.35106	4.78224	4.73985	GR-356_Ctrl_10D_peak_2074
chr2	236744789	236745011	223	236744869	12.00	6.29799	4.10534	2.87237	GR-356_Ctrl_10D_peak_2075
chr2	236769770	236770229	460	236770038	26.00	28.82807	13.72225	24.42774	GR-356_Ctrl_10D_peak_2076
chr2	236871648	236871967	320	236871816	13.00	9.28838	5.72736	5.61672	GR-356_Ctrl_10D_peak_2077
chr2	237024958	237025459	502	237025170	46.00	38.98653	12.08595	34.35892	GR-356_Ctrl_10D_peak_2078
chr2	237097874	237098299	426	237098098	107.00	157.49713	44.18251	151.29514	GR-356_Ctrl_10D_peak_2079
chr2	237156451	237156925	475	237156684	41.00	37.96341	13.26340	33.35011	GR-356_Ctrl_10D_peak_2080
chr2	237223210	237223711	502	237223547	24.00	21.80094	10.22743	17.60134	GR-356_Ctrl_10D_peak_2081
chr2	237227638	237227910	273	237227771	9.00	7.51202	5.35079	3.96361	GR-356_Ctrl_10D_peak_2082
chr2	237235411	237235892	482	237235535	14.00	7.95815	4.73693	4.37816	GR-356_Ctrl_10D_peak_2083
chr2	237432349	237433056	708	237432716	25.00	13.61351	5.63867	9.71280	GR-356_Ctrl_10D_peak_2084
chr2	237459686	237459960	275	237459865	11.00	6.43792	4.34895	2.98013	GR-356_Ctrl_10D_peak_2085
chr2	237500786	237501255	470	237500978	20.00	14.61480	7.22669	10.67925	GR-356_Ctrl_10D_peak_2086
chr2	237502472	237502801	330	237502648	15.00	10.65720	6.12398	6.90103	GR-356_Ctrl_10D_peak_2087
chr2	237687719	237688288	570	237687852	14.00	10.30761	6.13646	6.57570	GR-356_Ctrl_10D_peak_2088
chr2	237703722	237704008	287	237703835	11.00	8.95550	5.92227	5.30388	GR-356_Ctrl_10D_peak_2089
chr2	238143798	238144011	214	238143864	12.00	10.93743	6.95603	7.17142	GR-356_Ctrl_10D_peak_2090
chr2	238439457	238439850	394	238439607	36.00	30.42965	11.05892	25.98978	GR-356_Ctrl_10D_peak_2091
chr2	238597120	238597412	293	238597281	24.00	20.67458	9.56872	16.51237	GR-356_Ctrl_10D_peak_2092
chr2	240251168	240251810	643	240251507	76.00	95.02513	27.90576	89.52211	GR-356_Ctrl_10D_peak_2093
chr2	240319883	240320603	721	240320037	23.00	25.00561	12.47644	20.70926	GR-356_Ctrl_10D_peak_2094
chr2	240374540	240374746	207	240374715	12.00	9.30144	5.94281	5.62936	GR-356_Ctrl_10D_peak_2095
chr2	241540651	241540853	203	241540757	14.00	9.15029	5.43619	5.49398	GR-356_Ctrl_10D_peak_2096
chr2	241680920	241681150	231	241680992	11.00	8.62515	5.71550	5.00334	GR-356_Ctrl_10D_peak_2097
chr2	242031749	242032020	272	242031841	29.00	28.05470	12.16509	23.67362	GR-356_Ctrl_10D_peak_2098
chr20	1327249	1327451	203	1327321	19.00	8.72066	4.33744	5.08718	GR-356_Ctrl_10D_peak_2099
chr20	1416033	1416280	248	1416162	26.00	19.71597	8.43985	15.59237	GR-356_Ctrl_10D_peak_2100
chr20	1418444	1418737	294	1418584	24.00	14.87636	6.42870	10.92602	GR-356_Ctrl_10D_peak_2101
chr20	1567438	1567671	234	1567535	17.00	13.41753	7.29906	9.53508	GR-356_Ctrl_10D_peak_2102
chr20	1809281	1809517	237	1809352	25.00	14.28746	5.94698	10.36890	GR-356_Ctrl_10D_peak_2103
chr20	1813177	1813453	277	1813308	25.00	11.85501	4.87510	8.04458	GR-356_Ctrl_10D_peak_2104
chr20	1816312	1816678	367	1816481	47.00	40.20762	12.34310	35.55635	GR-356_Ctrl_10D_peak_2105
chr20	1825420	1825919	500	1825615	50.00	43.92375	13.11454	39.19643	GR-356_Ctrl_10D_peak_2106
chr20	2032108	2032425	318	2032287	25.00	24.64140	11.57530	20.34873	GR-356_Ctrl_10D_peak_2107
chr20	2237045	2237468	424	2237314	22.00	18.30915	8.80322	14.23111	GR-356_Ctrl_10D_peak_2108
chr20	2337273	2337487	215	2337423	12.00	10.36947	6.60701	6.63240	GR-356_Ctrl_10D_peak_2109
chr20	4102325	4102555	231	4102422	14.00	10.30761	6.13646	6.57570	GR-356_Ctrl_10D_peak_2110
chr20	4225764	4226174	411	4225930	16.00	10.56882	5.85018	6.82410	GR-356_Ctrl_10D_peak_2111
chr20	4512877	4513079	203	4512968	11.00	7.27170	4.86604	3.75222	GR-356_Ctrl_10D_peak_2112
chr20	5654698	5654900	203	5654805	14.00	7.95815	4.73693	4.37816	GR-356_Ctrl_10D_peak_2113
chr20	5657485	5657969	485	5657704	52.00	49.67279	15.17615	44.84044	GR-356_Ctrl_10D_peak_2114
chr20	5945949	5946351	403	5946151	53.00	60.43310	20.43905	55.41879	GR-356_Ctrl_10D_peak_2115
chr20	9015460	9016114	655	9015933	27.00	20.98960	8.84227	16.81438	GR-356_Ctrl_10D_peak_2116
chr20	9060003	9060289	287	9060179	19.00	15.58802	8.06213	11.61718	GR-356_Ctrl_10D_peak_2117
chr20	9200421	9200934	514	9200892	19.00	8.72066	4.33744	5.08718	GR-356_Ctrl_10D_peak_2118
chr20	9306679	9306901	223	9306829	14.00	10.40001	6.19300	6.66252	GR-356_Ctrl_10D_peak_2119
chr20	9344602	9344887	286	9344774	21.00	12.11161	5.65725	8.28673	GR-356_Ctrl_10D_peak_2120
chr20	9460679	9461030	352	9460839	47.00	45.60121	15.00418	40.84284	GR-356_Ctrl_10D_peak_2121
chr20	9492162	9492425	264	9492307	14.00	9.65783	5.74123	5.96542	GR-356_Ctrl_10D_peak_2122
chr20	10761639	10762099	461	10761963	17.00	7.24685	3.90370	3.73324	GR-356_Ctrl_10D_peak_2123
chr20	10861574	10861827	254	10861695	23.00	17.86373	8.25908	13.80007	GR-356_Ctrl_10D_peak_2124
chr20	11196299	11196609	311	11196465	38.00	40.45003	15.81462	35.79047	GR-356_Ctrl_10D_peak_2125
chr20	11229884	11230267	384	11230114	25.00	21.88306	9.95147	17.68093	GR-356_Ctrl_10D_peak_2126
chr20	11261593	11261795	203	11261710	11.00	7.86796	5.23985	4.30415	GR-356_Ctrl_10D_peak_2127
chr20	11387421	11387667	247	11387559	21.00	15.03150	7.20720	11.07672	GR-356_Ctrl_10D_peak_2128
chr20	11453528	11453876	349	11453700	42.00	39.26162	13.57919	34.62147	GR-356_Ctrl_10D_peak_2129
chr20	11851030	11851336	307	11851170	21.00	14.56176	6.94749	10.62918	GR-356_Ctrl_10D_peak_2130
chr20	12166195	12166490	296	12166334	23.00	22.61936	11.04536	18.39483	GR-356_Ctrl_10D_peak_2131
chr20	12929028	12929334	307	12929147	19.00	12.56442	6.31590	8.71315	GR-356_Ctrl_10D_peak_2132
chr20	13028077	13028400	324	13028228	24.00	18.98293	8.60320	14.87765	GR-356_Ctrl_10D_peak_2133
chr20	13030025	13030323	299	13030195	24.00	14.87636	6.42870	10.92602	GR-356_Ctrl_10D_peak_2134
chr20	17843451	17843921	471	17843674	32.00	24.90016	9.44930	20.60430	GR-356_Ctrl_10D_peak_2135
chr20	19993100	19993313	214	19993138	17.00	7.41197	3.98356	3.87321	GR-356_Ctrl_10D_peak_2136
chr20	22728176	22728521	346	22728378	25.00	13.61351	5.63867	9.71280	GR-356_Ctrl_10D_peak_2137
chr20	22763224	22763526	303	22763399	15.00	8.83037	5.05272	5.18296	GR-356_Ctrl_10D_peak_2138
chr20	22775678	22776263	586	22775952	118.00	142.41382	30.26339	136.36876	GR-356_Ctrl_10D_peak_2139
chr20	22795965	22796252	288	22796091	22.00	11.67031	5.26079	7.86511	GR-356_Ctrl_10D_peak_2140
chr20	22797151	22797383	233	22797311	15.00	8.83037	5.05272	5.18296	GR-356_Ctrl_10D_peak_2141
chr20	22921855	22922296	442	22922015	35.00	26.72964	9.50988	22.38883	GR-356_Ctrl_10D_peak_2142
chr20	23039971	23040262	292	23040109	15.00	11.25988	6.48805	7.47609	GR-356_Ctrl_10D_peak_2143
chr20	23622947	23623285	339	23623095	48.00	41.43764	12.60025	36.76003	GR-356_Ctrl_10D_peak_2144
chr20	24863357	24863634	278	24863531	12.00	7.31121	4.71136	3.78466	GR-356_Ctrl_10D_peak_2145
chr20	25237769	25238307	539	25237965	74.00	86.85285	24.57001	81.45279	GR-356_Ctrl_10D_peak_2146
chr20	25308974	25309246	273	25309117	33.00	23.82138	8.64668	19.56027	GR-356_Ctrl_10D_peak_2147
chr20	25309448	25309746	299	25309566	21.00	12.11161	5.65725	8.28673	GR-356_Ctrl_10D_peak_2148
chr20	25310356	25310665	310	25310515	44.00	29.26036	8.43768	24.85204	GR-356_Ctrl_10D_peak_2149
chr20	31696030	31696481	452	31696289	65.00	57.47653	14.31355	52.51294	GR-356_Ctrl_10D_peak_2150
chr20	31699120	31699487	368	31699298	28.00	22.11738	9.15806	17.90403	GR-356_Ctrl_10D_peak_2151
chr20	31704618	31704913	296	31704738	14.00	7.17713	4.29514	3.66668	GR-356_Ctrl_10D_peak_2152
chr20	31712536	31713042	507	31712724	67.00	72.21945	20.32450	67.02086	GR-356_Ctrl_10D_peak_2153
chr20	31713360	31713646	287	31713520	25.00	17.33440	7.44490	13.29023	GR-356_Ctrl_10D_peak_2154
chr20	35111247	35111874	628	35111719	21.00	14.56176	6.94749	10.62918	GR-356_Ctrl_10D_peak_2155
chr20	35129683	35129885	203	35129744	17.00	8.69704	4.62866	5.06540	GR-356_Ctrl_10D_peak_2156
chr20	35136199	35136443	245	35136358	15.00	7.12379	4.11437	3.61532	GR-356_Ctrl_10D_peak_2157
chr20	35215353	35215680	328	35215506	26.00	16.13758	6.61967	12.13820	GR-356_Ctrl_10D_peak_2158
chr20	35302957	35303322	366	35303189	29.00	22.30005	8.96669	18.08285	GR-356_Ctrl_10D_peak_2159
chr20	35305709	35306265	557	35305933	80.00	91.77704	24.21007	86.31614	GR-356_Ctrl_10D_peak_2160
chr20	35308104	35308697	594	35308242	19.00	10.36255	5.14296	6.62581	GR-356_Ctrl_10D_peak_2161
chr20	35312399	35312725	327	35312559	21.00	15.61174	7.53282	11.63924	GR-356_Ctrl_10D_peak_2162
chr20	35327230	35327566	337	35327394	30.00	20.84636	7.97159	16.68005	GR-356_Ctrl_10D_peak_2163
chr20	35883880	35884287	408	35884095	54.00	49.82129	14.52898	44.98666	GR-356_Ctrl_10D_peak_2164
chr20	36808815	36809200	386	36809010	17.00	13.06615	7.08836	9.19630	GR-356_Ctrl_10D_peak_2165
chr20	37687122	37687474	353	37687315	34.00	21.28172	7.27380	17.09928	GR-356_Ctrl_10D_peak_2166
chr20	37987080	37987350	271	37987221	10.00	6.43914	4.51421	2.98130	GR-356_Ctrl_10D_peak_2167
chr20	37989598	37990039	442	37989848	28.00	24.18122	10.29124	19.90537	GR-356_Ctrl_10D_peak_2168
chr20	37990499	37991089	591	37990805	199.00	284.00125	51.42958	276.71423	GR-356_Ctrl_10D_peak_2169
chr20	37994556	37994986	431	37994752	92.00	102.45738	23.91476	96.86073	GR-356_Ctrl_10D_peak_2170
chr20	38109821	38110535	715	38110300	39.00	27.13477	8.67488	22.77430	GR-356_Ctrl_10D_peak_2171
chr20	38144131	38144523	393	38144321	15.00	8.83037	5.05272	5.18296	GR-356_Ctrl_10D_peak_2172
chr20	38186736	38186947	212	38186805	16.00	9.63178	5.31398	5.94279	GR-356_Ctrl_10D_peak_2173
chr20	38198476	38198815	340	38198657	38.00	33.89251	12.19090	29.37231	GR-356_Ctrl_10D_peak_2174
chr20	38275935	38276197	263	38276122	24.00	14.87636	6.42870	10.92602	GR-356_Ctrl_10D_peak_2175
chr20	38604888	38605193	306	38605032	25.00	21.13928	9.52393	16.96159	GR-356_Ctrl_10D_peak_2176
chr20	38871049	38871371	323	38871218	30.00	35.37306	16.11540	30.82265	GR-356_Ctrl_10D_peak_2177
chr20	38932801	38933079	279	38932887	19.00	14.40739	7.36566	10.48616	GR-356_Ctrl_10D_peak_2178
chr20	40493573	40493898	326	40493702	49.00	53.67627	18.51410	48.77974	GR-356_Ctrl_10D_peak_2179
chr20	41002953	41003329	377	41003150	52.00	46.11929	13.47865	41.34732	GR-356_Ctrl_10D_peak_2180
chr20	41003537	41004024	488	41003836	47.00	40.92264	12.67984	36.25040	GR-356_Ctrl_10D_peak_2181
chr20	41008282	41008704	423	41008477	46.00	39.68576	12.41568	35.04073	GR-356_Ctrl_10D_peak_2182
chr20	41248688	41249022	335	41248850	33.00	33.43903	13.78711	28.93029	GR-356_Ctrl_10D_peak_2183
chr20	41436694	41437036	343	41436873	40.00	20.73788	6.04932	16.57527	GR-356_Ctrl_10D_peak_2184
chr20	43751204	43751695	492	43751479	32.00	24.90016	9.44930	20.60430	GR-356_Ctrl_10D_peak_2185
chr20	43752562	43752801	240	43752664	19.00	12.56442	6.31590	8.71315	GR-356_Ctrl_10D_peak_2186
chr20	43755898	43756243	346	43756095	29.00	15.13619	5.62512	11.17838	GR-356_Ctrl_10D_peak_2187
chr20	43939379	43939814	436	43939586	19.00	10.63634	5.28327	6.89007	GR-356_Ctrl_10D_peak_2188
chr20	44187299	44187798	500	44187598	62.00	64.97240	18.83005	59.87894	GR-356_Ctrl_10D_peak_2189
chr20	44573123	44573423	301	44573258	15.00	7.98919	4.58148	4.40650	GR-356_Ctrl_10D_peak_2190
chr20	44693021	44693301	281	44693190	21.00	12.41678	5.81159	8.58077	GR-356_Ctrl_10D_peak_2191
chr20	44714145	44714698	554	44714408	79.00	75.79283	17.34976	70.54595	GR-356_Ctrl_10D_peak_2192
chr20	45015239	45015525	287	45015343	22.00	13.01516	5.91440	9.14773	GR-356_Ctrl_10D_peak_2193
chr20	45358925	45359346	422	45359117	53.00	54.15467	17.05294	49.24373	GR-356_Ctrl_10D_peak_2194
chr20	45778989	45779269	281	45779147	23.00	10.30918	4.50010	6.57656	GR-356_Ctrl_10D_peak_2195
chr20	46835500	46835802	303	46835645	22.00	15.58957	7.26329	11.61718	GR-356_Ctrl_10D_peak_2196
chr20	46954454	46954709	256	46954596	20.00	13.43072	6.56433	9.54682	GR-356_Ctrl_10D_peak_2197
chr20	47124759	47125155	397	47124887	27.00	13.46549	5.25011	9.58075	GR-356_Ctrl_10D_peak_2198
chr20	47315778	47316035	258	47315925	12.00	6.29799	4.10534	2.87237	GR-356_Ctrl_10D_peak_2199
chr20	47317219	47317758	540	47317437	122.00	175.22890	44.34114	168.91530	GR-356_Ctrl_10D_peak_2200
chr20	47334039	47334570	532	47334322	229.00	318.19632	49.88055	310.18231	GR-356_Ctrl_10D_peak_2201
chr20	47348888	47349229	342	47349059	50.00	52.71712	17.55054	47.83223	GR-356_Ctrl_10D_peak_2202
chr20	47464418	47464637	220	47464492	20.00	9.48921	4.55431	5.80980	GR-356_Ctrl_10D_peak_2203
chr20	47960342	47960575	234	47960502	20.00	8.12304	3.93758	4.53799	GR-356_Ctrl_10D_peak_2204
chr20	48025584	48025868	285	48025688	25.00	17.95786	7.77113	13.89315	GR-356_Ctrl_10D_peak_2205
chr20	48538332	48538659	328	48538450	25.00	17.95786	7.77113	13.89315	GR-356_Ctrl_10D_peak_2206
chr20	48538891	48539202	312	48539069	21.00	10.27760	4.77118	6.55237	GR-356_Ctrl_10D_peak_2207
chr20	48614574	48614896	323	48614743	23.00	19.48305	9.18597	15.36237	GR-356_Ctrl_10D_peak_2208
chr20	49344887	49345318	432	49345085	53.00	42.79012	11.71109	38.08441	GR-356_Ctrl_10D_peak_2209
chr20	49460931	49461304	374	49461112	24.00	12.75363	5.42180	8.89377	GR-356_Ctrl_10D_peak_2210
chr20	49510431	49510916	486	49510675	77.00	67.24019	14.62531	62.11317	GR-356_Ctrl_10D_peak_2211
chr20	49528138	49528366	229	49528268	17.00	7.24685	3.90370	3.73324	GR-356_Ctrl_10D_peak_2212
chr20	49790260	49790623	364	49790434	18.00	11.59671	6.00011	7.79238	GR-356_Ctrl_10D_peak_2213
chr20	49989572	49989774	203	49989654	15.00	10.65720	6.12398	6.90103	GR-356_Ctrl_10D_peak_2214
chr20	50029975	50030229	255	50030103	18.00	10.57462	5.44051	6.82926	GR-356_Ctrl_10D_peak_2215
chr20	50031216	50031456	241	50031339	16.00	11.74402	6.54345	7.93518	GR-356_Ctrl_10D_peak_2216
chr20	50137295	50137538	244	50137397	27.00	17.63025	7.12080	13.57928	GR-356_Ctrl_10D_peak_2217
chr20	50308876	50309078	203	50308885	16.00	5.48972	3.18757	2.14440	GR-356_Ctrl_10D_peak_2218
chr20	50312869	50313203	335	50313033	35.00	23.01966	7.80739	18.78106	GR-356_Ctrl_10D_peak_2219
chr20	50373825	50374035	211	50373963	12.00	4.96098	3.34292	1.67862	GR-356_Ctrl_10D_peak_2220
chr20	50376887	50377299	413	50377200	13.00	9.20658	5.67704	5.54393	GR-356_Ctrl_10D_peak_2221
chr20	50395200	50395756	557	50395487	193.00	290.30353	57.98461	282.89517	GR-356_Ctrl_10D_peak_2222
chr20	50415517	50416002	486	50415810	71.00	71.85227	18.51465	66.65633	GR-356_Ctrl_10D_peak_2223
chr20	50422509	50422876	368	50422666	50.00	43.92375	13.11454	39.19643	GR-356_Ctrl_10D_peak_2224
chr20	50423081	50423590	510	50423334	67.00	74.48846	21.47407	69.25880	GR-356_Ctrl_10D_peak_2225
chr20	50440678	50441305	628	50440932	87.00	86.74717	19.08473	81.34795	GR-356_Ctrl_10D_peak_2226
chr20	50513783	50514148	366	50513968	44.00	29.26036	8.43768	24.85204	GR-356_Ctrl_10D_peak_2227
chr20	50540879	50541378	500	50541129	90.00	93.54182	20.81443	88.05668	GR-356_Ctrl_10D_peak_2228
chr20	50561635	50561929	295	50561813	17.00	10.54790	5.62657	6.80508	GR-356_Ctrl_10D_peak_2229
chr20	50724807	50725154	348	50724969	24.00	22.17468	10.44815	17.95914	GR-356_Ctrl_10D_peak_2230
chr20	51335285	51335874	590	51335541	170.00	202.06985	32.06319	195.50711	GR-356_Ctrl_10D_peak_2231
chr20	51345636	51346034	399	51345738	17.00	7.24685	3.90370	3.73324	GR-356_Ctrl_10D_peak_2232
chr20	51360476	51360786	311	51360600	36.00	27.09150	9.40962	22.73216	GR-356_Ctrl_10D_peak_2233
chr20	51366071	51366787	717	51366595	36.00	21.40624	6.93765	17.21871	GR-356_Ctrl_10D_peak_2234
chr20	51631413	51632039	627	51631755	48.00	33.42299	9.18770	28.91755	GR-356_Ctrl_10D_peak_2235
chr20	53622635	53622840	206	53622693	25.00	11.85501	4.87510	8.04458	GR-356_Ctrl_10D_peak_2236
chr20	53773792	53774325	534	53774112	62.00	60.45839	16.64229	55.44332	GR-356_Ctrl_10D_peak_2237
chr20	53827975	53828287	313	53828112	33.00	15.00199	5.01651	11.04834	GR-356_Ctrl_10D_peak_2238
chr20	53829422	53829635	214	53829552	21.00	14.43295	6.87692	10.51053	GR-356_Ctrl_10D_peak_2239
chr20	53830363	53830588	226	53830484	19.00	10.36255	5.14296	6.62581	GR-356_Ctrl_10D_peak_2240
chr20	53893304	53893557	254	53893445	28.00	20.48986	8.30393	16.33613	GR-356_Ctrl_10D_peak_2241
chr20	54132687	54133073	387	54132828	14.00	9.60480	5.70920	5.91997	GR-356_Ctrl_10D_peak_2242
chr20	56787710	56787931	222	56787833	14.00	6.37500	3.85722	2.93436	GR-356_Ctrl_10D_peak_2243
chr20	56788321	56788537	217	56788397	21.00	12.11161	5.65725	8.28673	GR-356_Ctrl_10D_peak_2244
chr20	58017557	58018018	462	58017848	41.00	26.23752	7.87517	21.90370	GR-356_Ctrl_10D_peak_2245
chr20	58342072	58342652	581	58342262	12.00	8.17300	5.24039	4.58672	GR-356_Ctrl_10D_peak_2246
chr20	58538864	58539095	232	58538964	18.00	11.48719	5.93916	7.69397	GR-356_Ctrl_10D_peak_2247
chr20	60249219	60249595	377	60249398	20.00	14.94223	7.41371	10.98906	GR-356_Ctrl_10D_peak_2248
chr20	60713312	60713716	405	60713602	17.00	15.04171	8.28402	11.08517	GR-356_Ctrl_10D_peak_2249
chr20	61185816	61186643	828	61186139	90.00	99.44626	23.40046	93.88857	GR-356_Ctrl_10D_peak_2250
chr20	61556047	61556395	349	61556227	24.00	14.87636	6.42870	10.92602	GR-356_Ctrl_10D_peak_2251
chr20	62623897	62624393	497	62624156	58.00	62.59358	19.32841	57.54195	GR-356_Ctrl_10D_peak_2252
chr20	62652203	62652405	203	62652236	17.00	7.24685	3.90370	3.73324	GR-356_Ctrl_10D_peak_2253
chr20	63575892	63576100	209	63575982	18.00	13.80571	7.27223	9.90112	GR-356_Ctrl_10D_peak_2254
chr20	63636981	63637226	246	63637082	11.00	8.56196	5.67587	4.94652	GR-356_Ctrl_10D_peak_2255
chr20	63686570	63687164	595	63686767	25.00	11.85501	4.87510	8.04458	GR-356_Ctrl_10D_peak_2256
chr20	63699086	63699540	455	63699344	45.00	44.24755	15.06961	39.51415	GR-356_Ctrl_10D_peak_2257
chr20	64152110	64152406	297	64152258	31.00	29.45728	12.24796	25.04061	GR-356_Ctrl_10D_peak_2258
chr20	64222387	64222609	223	64222465	19.00	11.48192	5.72685	7.69008	GR-356_Ctrl_10D_peak_2259
chr21	6021305	6021672	368	6021495	29.00	28.23959	12.27292	23.85041	GR-356_Ctrl_10D_peak_2260
chr21	6027552	6027782	231	6027637	12.00	10.93743	6.95603	7.17142	GR-356_Ctrl_10D_peak_2261
chr21	6049914	6050159	246	6050024	20.00	18.73982	9.66469	14.64792	GR-356_Ctrl_10D_peak_2262
chr21	8207178	8207490	313	8207366	20.00	8.21230	3.97657	4.62512	GR-356_Ctrl_10D_peak_2263
chr21	8210299	8210501	203	8210460	24.00	5.98402	2.79510	2.57999	GR-356_Ctrl_10D_peak_2264
chr21	8216263	8216715	453	8216528	32.00	15.84069	5.44966	11.85333	GR-356_Ctrl_10D_peak_2265
chr21	8217614	8217818	205	8217735	23.00	7.90722	3.54106	4.33485	GR-356_Ctrl_10D_peak_2266
chr21	8254682	8254944	263	8254920	24.00	5.98402	2.79510	2.57999	GR-356_Ctrl_10D_peak_2267
chr21	8259865	8260095	231	8259932	23.00	7.90722	3.54106	4.33485	GR-356_Ctrl_10D_peak_2268
chr21	8395961	8396231	271	8396080	23.00	12.33163	5.39900	8.49825	GR-356_Ctrl_10D_peak_2269
chr21	8398240	8398501	262	8398424	20.00	7.01318	3.46797	3.52074	GR-356_Ctrl_10D_peak_2270
chr21	8399485	8399766	282	8399537	24.00	9.69925	4.12853	6.00564	GR-356_Ctrl_10D_peak_2271
chr21	8400557	8400856	300	8400707	24.00	9.69925	4.12853	6.00564	GR-356_Ctrl_10D_peak_2272
chr21	8401163	8401584	422	8401297	24.00	9.56899	4.07747	5.88423	GR-356_Ctrl_10D_peak_2273
chr21	8437661	8437907	247	8437751	26.00	7.07224	3.02800	3.57709	GR-356_Ctrl_10D_peak_2274
chr21	8438319	8438568	250	8438426	21.00	6.94088	3.34801	3.45005	GR-356_Ctrl_10D_peak_2275
chr21	8439736	8440044	309	8439866	25.00	9.20586	3.83615	5.54393	GR-356_Ctrl_10D_peak_2276
chr21	8441145	8441587	443	8441246	21.00	9.75188	4.53069	6.05014	GR-356_Ctrl_10D_peak_2277
chr21	8442961	8443223	263	8443123	23.00	8.87712	3.91437	5.22884	GR-356_Ctrl_10D_peak_2278
chr21	8445484	8445845	362	8445654	31.00	13.47036	4.72142	9.58514	GR-356_Ctrl_10D_peak_2279
chr21	14889082	14889551	470	14889331	40.00	31.85864	10.54307	27.38524	GR-356_Ctrl_10D_peak_2280
chr21	15221970	15222240	271	15222136	14.00	10.30761	6.13646	6.57570	GR-356_Ctrl_10D_peak_2281
chr21	15706709	15706972	264	15706841	12.00	8.75946	5.60474	5.12077	GR-356_Ctrl_10D_peak_2282
chr21	18373684	18374027	344	18373880	19.00	12.56442	6.31590	8.71315	GR-356_Ctrl_10D_peak_2283
chr21	18383010	18383436	427	18383157	20.00	13.55309	6.63170	9.65682	GR-356_Ctrl_10D_peak_2284
chr21	21612392	21612760	369	21612574	31.00	37.73919	17.12253	33.13834	GR-356_Ctrl_10D_peak_2285
chr21	26389976	26390219	244	26390059	11.00	7.76250	5.17361	4.20185	GR-356_Ctrl_10D_peak_2286
chr21	29258905	29259245	341	29259028	17.00	13.52504	7.36375	9.63421	GR-356_Ctrl_10D_peak_2287
chr21	29501641	29501929	289	29501773	16.00	12.42749	6.95465	8.58616	GR-356_Ctrl_10D_peak_2288
chr21	31282287	31282694	408	31282435	35.00	28.34496	10.30833	23.95333	GR-356_Ctrl_10D_peak_2289
chr21	32411653	32411906	254	32411736	15.00	11.86155	6.85482	8.05101	GR-356_Ctrl_10D_peak_2290
chr21	34836132	34836366	235	34836256	16.00	10.08143	5.56920	6.36625	GR-356_Ctrl_10D_peak_2291
chr21	34836448	34836937	490	34836744	38.00	26.08930	8.45801	21.75888	GR-356_Ctrl_10D_peak_2292
chr21	34845801	34846059	259	34845892	13.00	7.11342	4.42113	3.60941	GR-356_Ctrl_10D_peak_2293
chr21	34865538	34865857	320	34865708	17.00	15.92056	8.81959	11.93070	GR-356_Ctrl_10D_peak_2294
chr21	34965503	34965737	235	34965609	19.00	15.78879	8.18195	11.80509	GR-356_Ctrl_10D_peak_2295
chr21	35136898	35137100	203	35136979	10.00	6.70629	4.68327	3.23208	GR-356_Ctrl_10D_peak_2296
chr21	35138845	35139131	287	35138958	31.00	16.86328	6.00013	12.83811	GR-356_Ctrl_10D_peak_2297
chr21	35198037	35198383	347	35198193	11.00	8.62515	5.71550	5.00334	GR-356_Ctrl_10D_peak_2298
chr21	35217659	35218019	361	35217853	23.00	17.15222	7.86240	13.11785	GR-356_Ctrl_10D_peak_2299
chr21	35303108	35303332	225	35303253	11.00	7.76250	5.17361	4.20185	GR-356_Ctrl_10D_peak_2300
chr21	35525400	35525744	345	35525567	35.00	20.47335	6.75015	16.32022	GR-356_Ctrl_10D_peak_2301
chr21	37338832	37339302	471	37339023	21.00	17.15361	8.42047	13.11785	GR-356_Ctrl_10D_peak_2302
chr21	37659043	37659500	458	37659242	28.00	18.79646	7.45729	14.69530	GR-356_Ctrl_10D_peak_2303
chr21	37849798	37850129	332	37849962	23.00	13.93699	6.17155	10.02573	GR-356_Ctrl_10D_peak_2304
chr21	37871285	37871947	663	37871662	27.00	25.61799	11.45473	21.29588	GR-356_Ctrl_10D_peak_2305
chr21	37879073	37879408	336	37879246	19.00	14.20561	7.24825	10.28829	GR-356_Ctrl_10D_peak_2306
chr21	38277831	38278091	261	38277904	12.00	6.29799	4.10534	2.87237	GR-356_Ctrl_10D_peak_2307
chr21	38289769	38289980	212	38289888	17.00	10.54790	5.62657	6.80508	GR-356_Ctrl_10D_peak_2308
chr21	38753396	38753654	259	38753534	16.00	13.85411	7.82380	9.94685	GR-356_Ctrl_10D_peak_2309
chr21	38839670	38840297	628	38840136	42.00	40.22363	14.08681	35.56996	GR-356_Ctrl_10D_peak_2310
chr21	38985168	38985371	204	38985270	12.00	6.91785	4.47367	3.42709	GR-356_Ctrl_10D_peak_2311
chr21	41615579	41615841	263	41615715	18.00	11.59671	6.00011	7.79238	GR-356_Ctrl_10D_peak_2312
chr21	41641108	41641558	451	41641444	22.00	18.30915	8.80322	14.23111	GR-356_Ctrl_10D_peak_2313
chr21	41641796	41642204	409	41641996	37.00	28.98961	10.03821	24.58813	GR-356_Ctrl_10D_peak_2314
chr21	41653964	41654181	218	41654149	13.00	8.21603	5.07378	4.62604	GR-356_Ctrl_10D_peak_2315
chr21	41786406	41786864	459	41786675	20.00	15.28427	7.61066	11.32375	GR-356_Ctrl_10D_peak_2316
chr21	41958185	41958421	237	41958316	19.00	12.56442	6.31590	8.71315	GR-356_Ctrl_10D_peak_2317
chr21	42724401	42724650	250	42724598	17.00	10.10331	5.38001	6.38706	GR-356_Ctrl_10D_peak_2318
chr21	43307125	43307338	214	43307239	13.00	5.65348	3.60007	2.27384	GR-356_Ctrl_10D_peak_2319
chr21	43488414	43488643	230	43488542	15.00	14.65187	8.56126	10.70843	GR-356_Ctrl_10D_peak_2320
chr21	43516755	43517239	485	43517073	19.00	19.96593	10.70158	15.82610	GR-356_Ctrl_10D_peak_2321
chr21	43585957	43586391	435	43586184	53.00	47.71565	13.88599	42.91491	GR-356_Ctrl_10D_peak_2322
chr21	43734804	43735032	229	43734941	21.00	14.56176	6.94749	10.62918	GR-356_Ctrl_10D_peak_2323
chr21	44928772	44929026	255	44928908	24.00	9.69925	4.12853	6.00564	GR-356_Ctrl_10D_peak_2324
chr21	45364112	45364331	220	45364234	17.00	12.73252	6.88948	8.87421	GR-356_Ctrl_10D_peak_2325
chr21	45427633	45428158	526	45427924	46.00	52.52131	19.22758	47.63863	GR-356_Ctrl_10D_peak_2326
chr21	45698544	45698953	410	45698752	41.00	37.96341	13.26340	33.35011	GR-356_Ctrl_10D_peak_2327
chr21	45819018	45819248	231	45819136	21.00	14.56176	6.94749	10.62918	GR-356_Ctrl_10D_peak_2328
chr22	17570781	17571195	415	17571020	45.00	48.87859	17.60645	44.05718	GR-356_Ctrl_10D_peak_2329
chr22	17576361	17576761	401	17576542	28.00	22.11738	9.15806	17.90403	GR-356_Ctrl_10D_peak_2330
chr22	18032520	18032756	237	18032617	19.00	10.36255	5.14296	6.62581	GR-356_Ctrl_10D_peak_2331
chr22	18061231	18061562	332	18061440	22.00	20.19188	9.91608	16.04475	GR-356_Ctrl_10D_peak_2332
chr22	18147194	18147396	203	18147224	10.00	7.88452	5.42875	4.31631	GR-356_Ctrl_10D_peak_2333
chr22	19881184	19881433	250	19881348	16.00	6.54374	3.68682	3.07554	GR-356_Ctrl_10D_peak_2334
chr22	20141748	20142092	345	20141927	36.00	27.31246	9.51447	22.94630	GR-356_Ctrl_10D_peak_2335
chr22	20555331	20555533	203	20555402	12.00	6.29799	4.10534	2.87237	GR-356_Ctrl_10D_peak_2336
chr22	20567438	20567682	245	20567574	11.00	7.86796	5.23985	4.30415	GR-356_Ctrl_10D_peak_2337
chr22	20569280	20569599	320	20569407	13.00	5.65348	3.60007	2.27384	GR-356_Ctrl_10D_peak_2338
chr22	21037744	21038047	304	21037846	35.00	30.39722	11.36863	25.95806	GR-356_Ctrl_10D_peak_2339
chr22	22703698	22703966	269	22703857	17.00	17.26211	9.63142	13.22009	GR-356_Ctrl_10D_peak_2340
chr22	23401210	23401757	548	23401504	103.00	150.02635	42.54612	143.90164	GR-356_Ctrl_10D_peak_2341
chr22	23521668	23521938	271	23521860	16.00	9.72846	5.36852	6.02673	GR-356_Ctrl_10D_peak_2342
chr22	24206893	24207145	253	24207031	21.00	19.57220	9.85884	15.45055	GR-356_Ctrl_10D_peak_2343
chr22	24208017	24208394	378	24208209	24.00	17.55129	7.81468	13.50081	GR-356_Ctrl_10D_peak_2344
chr22	24991897	24992195	299	24992043	11.00	8.56196	5.67587	4.94652	GR-356_Ctrl_10D_peak_2345
chr22	25747585	25747834	250	25747720	20.00	11.22712	5.40011	7.44680	GR-356_Ctrl_10D_peak_2346
chr22	25759891	25760249	359	25760092	33.00	18.64333	6.37514	14.55323	GR-356_Ctrl_10D_peak_2347
chr22	26894903	26895148	246	26895016	15.00	13.28563	7.72860	9.41221	GR-356_Ctrl_10D_peak_2348
chr22	27107885	27108102	218	27108042	11.00	8.14364	5.41311	4.55763	GR-356_Ctrl_10D_peak_2349
chr22	27113125	27113428	304	27113236	14.00	10.30761	6.13646	6.57570	GR-356_Ctrl_10D_peak_2350
chr22	27115862	27116327	466	27115936	15.00	11.25988	6.48805	7.47609	GR-356_Ctrl_10D_peak_2351
chr22	27135773	27136018	246	27135897	28.00	22.75101	9.50041	18.52287	GR-356_Ctrl_10D_peak_2352
chr22	27223577	27223956	380	27223758	21.00	18.65439	9.30844	14.56417	GR-356_Ctrl_10D_peak_2353
chr22	27239050	27239651	602	27239400	15.00	12.77258	7.41360	8.91261	GR-356_Ctrl_10D_peak_2354
chr22	27456976	27457422	447	27457172	57.00	47.56951	12.57857	42.77110	GR-356_Ctrl_10D_peak_2355
chr22	27461535	27461792	258	27461649	12.00	6.29799	4.10534	2.87237	GR-356_Ctrl_10D_peak_2356
chr22	27531778	27532237	460	27532025	17.00	17.26211	9.63142	13.22009	GR-356_Ctrl_10D_peak_2357
chr22	27866148	27866554	407	27866416	29.00	19.81433	7.71444	15.68581	GR-356_Ctrl_10D_peak_2358
chr22	29031388	29031659	272	29031511	22.00	17.50084	8.33549	13.45208	GR-356_Ctrl_10D_peak_2359
chr22	29306581	29306816	236	29306656	17.00	10.65101	5.68431	6.89792	GR-356_Ctrl_10D_peak_2360
chr22	30205541	30205949	409	30205693	17.00	10.65101	5.68431	6.89792	GR-356_Ctrl_10D_peak_2361
chr22	30206927	30207389	463	30207165	38.00	29.56363	10.02877	25.14299	GR-356_Ctrl_10D_peak_2362
chr22	30210305	30210693	389	30210400	15.00	10.77279	6.19349	7.01546	GR-356_Ctrl_10D_peak_2363
chr22	30291011	30291458	448	30291203	38.00	48.04623	20.27422	43.23961	GR-356_Ctrl_10D_peak_2364
chr22	30408635	30409158	524	30408936	49.00	48.61615	15.78976	43.80056	GR-356_Ctrl_10D_peak_2365
chr22	30420592	30420979	388	30420793	23.00	20.56168	9.81834	16.40304	GR-356_Ctrl_10D_peak_2366
chr22	30422929	30423343	415	30423115	65.00	63.56386	16.97176	58.49475	GR-356_Ctrl_10D_peak_2367
chr22	30717186	30717458	273	30717291	19.00	10.36255	5.14296	6.62581	GR-356_Ctrl_10D_peak_2368
chr22	32020223	32020476	254	32020384	25.00	18.78006	8.21068	14.68246	GR-356_Ctrl_10D_peak_2369
chr22	32136085	32136408	324	32136339	12.00	8.22331	5.27154	4.62849	GR-356_Ctrl_10D_peak_2370
chr22	35191490	35191824	335	35191668	19.00	10.36255	5.14296	6.62581	GR-356_Ctrl_10D_peak_2371
chr22	35629921	35630146	226	35630047	15.00	10.65720	6.12398	6.90103	GR-356_Ctrl_10D_peak_2372
chr22	35783877	35784449	573	35784048	12.00	9.63177	6.14885	5.94279	GR-356_Ctrl_10D_peak_2373
chr22	36329296	36329739	444	36329600	15.00	5.86474	3.46995	2.47256	GR-356_Ctrl_10D_peak_2374
chr22	36398625	36398971	347	36398798	28.00	24.56963	10.50996	20.27740	GR-356_Ctrl_10D_peak_2375
chr22	36439786	36440028	243	36439924	16.00	9.72846	5.36852	6.02673	GR-356_Ctrl_10D_peak_2376
chr22	36541761	36541989	229	36541891	20.00	11.22712	5.40011	7.44680	GR-356_Ctrl_10D_peak_2377
chr22	37196853	37197061	209	37197008	13.00	7.78829	4.81779	4.22574	GR-356_Ctrl_10D_peak_2378
chr22	37307191	37307410	220	37307256	17.00	11.02729	5.89680	7.25848	GR-356_Ctrl_10D_peak_2379
chr22	37432166	37432417	252	37432318	20.00	14.61480	7.22669	10.67925	GR-356_Ctrl_10D_peak_2380
chr22	37525424	37525855	432	37525560	11.00	5.51391	3.78954	2.15920	GR-356_Ctrl_10D_peak_2381
chr22	37526450	37526652	203	37526505	12.00	8.29870	5.31827	4.69290	GR-356_Ctrl_10D_peak_2382
chr22	37752653	37752890	238	37752800	21.00	11.58162	5.39381	7.78350	GR-356_Ctrl_10D_peak_2383
chr22	39174781	39175127	347	39174971	20.00	16.82593	8.51557	12.80157	GR-356_Ctrl_10D_peak_2384
chr22	39176217	39176445	229	39176309	26.00	22.14883	9.78514	17.93335	GR-356_Ctrl_10D_peak_2385
chr22	39961401	39961664	264	39961485	18.00	12.54767	6.53844	8.70243	GR-356_Ctrl_10D_peak_2386
chr22	40040957	40041260	304	40041156	20.00	11.22712	5.40011	7.44680	GR-356_Ctrl_10D_peak_2387
chr22	40258446	40258977	532	40258675	58.00	83.80353	31.38893	78.44698	GR-356_Ctrl_10D_peak_2388
chr22	40499145	40499656	512	40499413	68.00	75.99173	21.78987	70.73885	GR-356_Ctrl_10D_peak_2389
chr22	40509794	40509996	203	40509885	11.00	8.31799	5.52268	4.70885	GR-356_Ctrl_10D_peak_2390
chr22	41418001	41418253	253	41418100	17.00	15.04171	8.28402	11.08517	GR-356_Ctrl_10D_peak_2391
chr22	42727594	42727904	311	42727738	18.00	9.51884	4.88581	5.83557	GR-356_Ctrl_10D_peak_2392
chr22	42933837	42934106	270	42933946	18.00	13.80571	7.27223	9.90112	GR-356_Ctrl_10D_peak_2393
chr22	42990832	42991315	484	42991080	116.00	154.24535	36.94804	148.07060	GR-356_Ctrl_10D_peak_2394
chr22	44449289	44449491	203	44449322	10.00	5.95660	4.21024	2.55349	GR-356_Ctrl_10D_peak_2395
chr22	45518663	45519061	399	45518863	23.00	25.61965	12.84190	21.29597	GR-356_Ctrl_10D_peak_2396
chr22	45605379	45605628	250	45605450	14.00	10.30761	6.13646	6.57570	GR-356_Ctrl_10D_peak_2397
chr22	45688755	45689080	326	45688917	28.00	26.74302	11.75959	22.39920	GR-356_Ctrl_10D_peak_2398
chr22	46055110	46055393	284	46055254	20.00	13.55309	6.63170	9.65682	GR-356_Ctrl_10D_peak_2399
chr22	46105470	46105773	304	46105613	22.00	22.58042	11.35101	18.35768	GR-356_Ctrl_10D_peak_2400
chr22	49971490	49971752	263	49971652	15.00	11.25988	6.48805	7.47609	GR-356_Ctrl_10D_peak_2401
chr22_KI270733v1_random	130416	130622	207	130618	22.00	4.99074	2.57149	1.70173	GR-356_Ctrl_10D_peak_2402
chr22_KI270733v1_random	131455	132258	804	131873	25.00	8.17489	3.46675	4.58857	GR-356_Ctrl_10D_peak_2403
chr22_KI270733v1_random	132563	132934	372	132804	26.00	8.79806	3.60008	5.15922	GR-356_Ctrl_10D_peak_2404
chr22_KI270733v1_random	133912	134171	260	134098	19.00	5.52323	2.95089	2.16270	GR-356_Ctrl_10D_peak_2405
chr22_KI270733v1_random	135075	135408	334	135217	34.00	14.97826	4.88997	11.02484	GR-356_Ctrl_10D_peak_2406
chr22_KI270733v1_random	135783	136069	287	135948	27.00	7.59574	3.13051	4.04500	GR-356_Ctrl_10D_peak_2407
chr22_KI270733v1_random	171348	171900	553	171815	24.00	9.56899	4.07747	5.88423	GR-356_Ctrl_10D_peak_2408
chr22_KI270733v1_random	172388	172715	328	172531	23.00	5.47887	2.68329	2.13462	GR-356_Ctrl_10D_peak_2409
chr22_KI270733v1_random	177695	178064	370	177917	28.00	12.65353	4.78910	8.80064	GR-356_Ctrl_10D_peak_2410
chr3	4417021	4417280	260	4417170	13.00	10.44517	6.44313	6.70492	GR-356_Ctrl_10D_peak_2411
chr3	7709786	7710070	285	7709953	12.00	10.87226	6.91621	7.11008	GR-356_Ctrl_10D_peak_2412
chr3	8319779	8320213	435	8319928	22.00	19.34005	9.40924	15.22368	GR-356_Ctrl_10D_peak_2413
chr3	8490377	8490612	236	8490431	13.00	10.37555	6.39995	6.63821	GR-356_Ctrl_10D_peak_2414
chr3	8845757	8845987	231	8845892	16.00	13.85411	7.82380	9.94685	GR-356_Ctrl_10D_peak_2415
chr3	9175489	9175725	237	9175619	12.00	8.75946	5.60474	5.12077	GR-356_Ctrl_10D_peak_2416
chr3	9884516	9884973	458	9884671	27.00	20.82214	8.75244	16.65837	GR-356_Ctrl_10D_peak_2417
chr3	11415203	11415422	220	11415337	12.00	10.93743	6.95603	7.17142	GR-356_Ctrl_10D_peak_2418
chr3	11568088	11568441	354	11568273	31.00	30.91800	13.09111	26.46207	GR-356_Ctrl_10D_peak_2419
chr3	12193318	12193768	451	12193515	51.00	36.63741	9.75021	32.05521	GR-356_Ctrl_10D_peak_2420
chr3	12508296	12508629	334	12508450	31.00	30.72021	12.97610	26.27355	GR-356_Ctrl_10D_peak_2421
chr3	12644317	12644758	442	12644509	31.00	30.91800	13.09111	26.46207	GR-356_Ctrl_10D_peak_2422
chr3	12763382	12763586	205	12763512	16.00	9.72846	5.36852	6.02673	GR-356_Ctrl_10D_peak_2423
chr3	13024875	13025161	287	13024996	15.00	14.57073	8.51225	10.63709	GR-356_Ctrl_10D_peak_2424
chr3	14167317	14167611	295	14167439	22.00	20.19188	9.91608	16.04475	GR-356_Ctrl_10D_peak_2425
chr3	15781939	15782476	538	15782232	64.00	82.45225	27.33265	77.11520	GR-356_Ctrl_10D_peak_2426
chr3	15794358	15794676	319	15794506	23.00	17.86373	8.25908	13.80007	GR-356_Ctrl_10D_peak_2427
chr3	15805761	15806025	265	15805936	24.00	19.79094	9.06031	15.66491	GR-356_Ctrl_10D_peak_2428
chr3	15983482	15983759	278	15983614	27.00	26.66585	12.07175	22.32523	GR-356_Ctrl_10D_peak_2429
chr3	16056292	16056530	239	16056429	13.00	9.28838	5.72736	5.61672	GR-356_Ctrl_10D_peak_2430
chr3	16060167	16060678	512	16060409	40.00	45.14730	17.67649	40.39559	GR-356_Ctrl_10D_peak_2431
chr3	16484312	16484630	319	16484431	17.00	7.24685	3.90370	3.73324	GR-356_Ctrl_10D_peak_2432
chr3	19889188	19889447	260	19889259	19.00	16.52311	8.62268	12.51361	GR-356_Ctrl_10D_peak_2433
chr3	20054506	20054949	444	20054799	18.00	14.53192	7.70456	10.60465	GR-356_Ctrl_10D_peak_2434
chr3	23740537	23740743	207	23740585	12.00	10.53143	6.70696	6.79009	GR-356_Ctrl_10D_peak_2435
chr3	23959364	23959777	414	23959542	42.00	30.33422	9.32549	25.89925	GR-356_Ctrl_10D_peak_2436
chr3	24146033	24146468	436	24146239	30.00	31.17540	13.62348	26.71602	GR-356_Ctrl_10D_peak_2437
chr3	25493812	25494078	267	25493994	9.00	5.87397	4.31134	2.47776	GR-356_Ctrl_10D_peak_2438
chr3	25508806	25509241	436	25509040	29.00	28.23959	12.27292	23.85041	GR-356_Ctrl_10D_peak_2439
chr3	30282391	30282612	222	30282583	13.00	5.65348	3.60007	2.27384	GR-356_Ctrl_10D_peak_2440
chr3	30286270	30286685	416	30286520	28.00	27.74401	12.34680	23.37445	GR-356_Ctrl_10D_peak_2441
chr3	30304997	30305408	412	30305230	21.00	18.13681	9.00014	14.06386	GR-356_Ctrl_10D_peak_2442
chr3	30347648	30348047	400	30347750	15.00	7.12379	4.11437	3.61532	GR-356_Ctrl_10D_peak_2443
chr3	30492889	30493138	250	30493013	19.00	8.72066	4.33744	5.08718	GR-356_Ctrl_10D_peak_2444
chr3	30493991	30494310	320	30494136	15.00	7.12379	4.11437	3.61532	GR-356_Ctrl_10D_peak_2445
chr3	30510682	30510982	301	30510854	18.00	13.14795	6.88584	9.27546	GR-356_Ctrl_10D_peak_2446
chr3	30511432	30511810	379	30511630	29.00	23.25980	9.47386	19.00767	GR-356_Ctrl_10D_peak_2447
chr3	31004249	31004458	210	31004380	12.00	8.29870	5.31827	4.69290	GR-356_Ctrl_10D_peak_2448
chr3	31968951	31969321	371	31969132	19.00	12.56442	6.31590	8.71315	GR-356_Ctrl_10D_peak_2449
chr3	32226849	32227112	264	32227005	17.00	15.04171	8.28402	11.08517	GR-356_Ctrl_10D_peak_2450
chr3	37206072	37206314	243	37206128	13.00	9.28838	5.72736	5.61672	GR-356_Ctrl_10D_peak_2451
chr3	37863346	37863548	203	37863406	11.00	8.68926	5.75569	5.06153	GR-356_Ctrl_10D_peak_2452
chr3	38168537	38168796	260	38168662	21.00	14.56176	6.94749	10.62918	GR-356_Ctrl_10D_peak_2453
chr3	38542482	38542821	340	38542650	15.00	10.65720	6.12398	6.90103	GR-356_Ctrl_10D_peak_2454
chr3	39180763	39181021	259	39180843	15.00	10.65720	6.12398	6.90103	GR-356_Ctrl_10D_peak_2455
chr3	40800513	40800715	203	40800667	13.00	8.21603	5.07378	4.62604	GR-356_Ctrl_10D_peak_2456
chr3	42473592	42473809	218	42473694	17.00	16.02543	8.88340	12.02762	GR-356_Ctrl_10D_peak_2457
chr3	43748132	43748367	236	43748278	18.00	17.29416	9.37693	13.25045	GR-356_Ctrl_10D_peak_2458
chr3	43753825	43754208	384	43754006	41.00	33.02191	10.80021	28.52013	GR-356_Ctrl_10D_peak_2459
chr3	43866410	43867092	683	43866772	27.00	24.34837	10.71697	20.06435	GR-356_Ctrl_10D_peak_2460
chr3	44885688	44885971	284	44885819	25.00	20.11907	8.94733	15.97394	GR-356_Ctrl_10D_peak_2461
chr3	45178313	45178742	430	45178501	22.00	15.58957	7.26329	11.61718	GR-356_Ctrl_10D_peak_2462
chr3	45897345	45897549	205	45897440	12.00	9.36569	5.98290	5.68975	GR-356_Ctrl_10D_peak_2463
chr3	48402298	48402536	239	48402386	19.00	8.72066	4.33744	5.08718	GR-356_Ctrl_10D_peak_2464
chr3	48598414	48598735	322	48598590	12.00	8.29870	5.31827	4.69290	GR-356_Ctrl_10D_peak_2465
chr3	48694365	48694744	380	48694551	17.00	8.69704	4.62866	5.06540	GR-356_Ctrl_10D_peak_2466
chr3	50316536	50316804	269	50316618	12.00	10.78483	6.86268	7.02704	GR-356_Ctrl_10D_peak_2467
chr3	52046585	52046849	265	52046726	20.00	11.22712	5.40011	7.44680	GR-356_Ctrl_10D_peak_2468
chr3	52671012	52671231	220	52671072	16.00	8.82704	4.86782	5.18296	GR-356_Ctrl_10D_peak_2469
chr3	53150307	53150552	246	53150438	19.00	15.78879	8.18195	11.80509	GR-356_Ctrl_10D_peak_2470
chr3	54891674	54891953	280	54891790	12.00	10.53143	6.70696	6.79009	GR-356_Ctrl_10D_peak_2471
chr3	55162143	55162422	280	55162257	13.00	9.28838	5.72736	5.61672	GR-356_Ctrl_10D_peak_2472
chr3	55169637	55169938	302	55169789	18.00	12.54767	6.53844	8.70243	GR-356_Ctrl_10D_peak_2473
chr3	55343835	55344172	338	55344014	13.00	12.14649	7.49111	8.31795	GR-356_Ctrl_10D_peak_2474
chr3	55500439	55500712	274	55500602	15.00	13.02369	7.56782	9.15602	GR-356_Ctrl_10D_peak_2475
chr3	56852642	56852868	227	56852764	13.00	12.14649	7.49111	8.31795	GR-356_Ctrl_10D_peak_2476
chr3	56955581	56955783	203	56955690	11.00	9.76027	6.42095	6.05470	GR-356_Ctrl_10D_peak_2477
chr3	57974840	57975106	267	57974948	26.00	16.80506	6.94299	12.78369	GR-356_Ctrl_10D_peak_2478
chr3	58047813	58048129	317	58047949	43.00	47.73610	17.84214	42.93351	GR-356_Ctrl_10D_peak_2479
chr3	58048302	58048529	228	58048461	15.00	10.11215	5.79860	6.39343	GR-356_Ctrl_10D_peak_2480
chr3	58336167	58336418	252	58336278	15.00	12.85513	7.46430	8.99457	GR-356_Ctrl_10D_peak_2481
chr3	61627833	61628120	288	61627938	15.00	10.65720	6.12398	6.90103	GR-356_Ctrl_10D_peak_2482
chr3	61848233	61848500	268	61848370	20.00	19.89701	10.36397	15.75988	GR-356_Ctrl_10D_peak_2483
chr3	61848995	61849286	292	61849165	14.00	10.84639	6.46701	7.08551	GR-356_Ctrl_10D_peak_2484
chr3	62587227	62587477	251	62587330	22.00	21.92171	10.95471	17.71666	GR-356_Ctrl_10D_peak_2485
chr3	62587734	62588125	392	62588000	25.00	18.78006	8.21068	14.68246	GR-356_Ctrl_10D_peak_2486
chr3	62604342	62604597	256	62604410	21.00	14.56176	6.94749	10.62918	GR-356_Ctrl_10D_peak_2487
chr3	63976637	63976839	203	63976698	13.00	10.10612	6.23286	6.38965	GR-356_Ctrl_10D_peak_2488
chr3	64300827	64301072	246	64300953	17.00	13.52504	7.36375	9.63421	GR-356_Ctrl_10D_peak_2489
chr3	64342939	64343319	381	64343169	23.00	20.56168	9.81834	16.40304	GR-356_Ctrl_10D_peak_2490
chr3	65006457	65006679	223	65006498	8.00	6.44733	4.81571	2.98262	GR-356_Ctrl_10D_peak_2491
chr3	65030875	65031095	221	65030986	16.00	15.85818	9.04427	11.86969	GR-356_Ctrl_10D_peak_2492
chr3	66594120	66594446	327	66594272	14.00	12.72425	7.62347	8.86847	GR-356_Ctrl_10D_peak_2493
chr3	67647438	67647831	394	67647641	27.00	25.44601	11.35409	21.13571	GR-356_Ctrl_10D_peak_2494
chr3	71504624	71504986	363	71504806	23.00	10.30918	4.50010	6.57656	GR-356_Ctrl_10D_peak_2495
chr3	71998882	71999310	429	71999078	56.00	46.36322	12.36170	41.58686	GR-356_Ctrl_10D_peak_2496
chr3	72337018	72337379	362	72337218	26.00	30.04870	14.44713	25.61727	GR-356_Ctrl_10D_peak_2497
chr3	73036536	73036807	272	73036674	17.00	15.61508	8.63353	11.64225	GR-356_Ctrl_10D_peak_2498
chr3	80232803	80233155	353	80232993	24.00	26.95008	13.30040	22.59393	GR-356_Ctrl_10D_peak_2499
chr3	86922904	86923239	336	86923085	36.00	31.63035	11.68442	27.16101	GR-356_Ctrl_10D_peak_2500
chr3	86973567	86973819	253	86973680	14.00	6.37500	3.85722	2.93436	GR-356_Ctrl_10D_peak_2501
chr3	88141720	88141922	203	88141902	11.00	9.09488	6.00923	5.44151	GR-356_Ctrl_10D_peak_2502
chr3	88958190	88958461	272	88958321	10.00	8.61749	5.88587	4.99608	GR-356_Ctrl_10D_peak_2503
chr3	93470539	93470776	238	93470597	373.00	7.25959	1.32994	3.74560	GR-356_Ctrl_10D_peak_2504
chr3	93844097	93844378	282	93844226	21.00	17.15361	8.42047	13.11785	GR-356_Ctrl_10D_peak_2505
chr3	98922683	98923268	586	98922955	142.00	149.12859	23.61520	143.01184	GR-356_Ctrl_10D_peak_2506
chr3	98971132	98971481	350	98971301	24.00	18.23935	8.19001	14.16380	GR-356_Ctrl_10D_peak_2507
chr3	99535305	99535572	268	99535403	18.00	17.29416	9.37693	13.25045	GR-356_Ctrl_10D_peak_2508
chr3	99543231	99543455	225	99543313	16.00	7.89826	4.37151	4.32601	GR-356_Ctrl_10D_peak_2509
chr3	99563165	99563573	409	99563440	15.00	7.12379	4.11437	3.61532	GR-356_Ctrl_10D_peak_2510
chr3	99859845	99860244	400	99860005	20.00	15.28427	7.61066	11.32375	GR-356_Ctrl_10D_peak_2511
chr3	99862255	99862546	292	99862401	25.00	21.88306	9.95147	17.68093	GR-356_Ctrl_10D_peak_2512
chr3	99901332	99901593	262	99901492	18.00	7.97287	4.12057	4.39107	GR-356_Ctrl_10D_peak_2513
chr3	100002920	100003248	329	100003023	12.00	6.29799	4.10534	2.87237	GR-356_Ctrl_10D_peak_2514
chr3	100040561	100040983	423	100040708	35.00	30.39722	11.36863	25.95806	GR-356_Ctrl_10D_peak_2515
chr3	100042424	100042741	318	100042500	12.00	6.29799	4.10534	2.87237	GR-356_Ctrl_10D_peak_2516
chr3	100047428	100047782	355	100047596	17.00	14.68435	8.06632	10.74059	GR-356_Ctrl_10D_peak_2517
chr3	101929028	101929243	216	101929162	15.00	8.83037	5.05272	5.18296	GR-356_Ctrl_10D_peak_2518
chr3	101940661	101940863	203	101940771	17.00	7.24685	3.90370	3.73324	GR-356_Ctrl_10D_peak_2519
chr3	102130286	102130639	354	102130439	28.00	22.11738	9.15806	17.90403	GR-356_Ctrl_10D_peak_2520
chr3	105362359	105362723	365	105362521	60.00	56.45958	15.51316	51.51493	GR-356_Ctrl_10D_peak_2521
chr3	105792329	105792799	471	105792507	44.00	36.57191	11.57166	31.99191	GR-356_Ctrl_10D_peak_2522
chr3	106726279	106726548	270	106726432	15.00	11.35453	6.54556	7.56438	GR-356_Ctrl_10D_peak_2523
chr3	107217209	107217628	420	107217449	43.00	45.97702	16.84095	41.20564	GR-356_Ctrl_10D_peak_2524
chr3	107404790	107405048	259	107404905	15.00	12.69114	7.36357	8.83583	GR-356_Ctrl_10D_peak_2525
chr3	109702293	109702566	274	109702422	14.00	13.38527	8.02619	9.50636	GR-356_Ctrl_10D_peak_2526
chr3	110527296	110527624	329	110527467	18.00	7.97287	4.12057	4.39107	GR-356_Ctrl_10D_peak_2527
chr3	111735301	111735793	493	111735496	37.00	28.43243	9.77162	24.03705	GR-356_Ctrl_10D_peak_2528
chr3	111851704	111851906	203	111851861	10.00	6.41677	4.50007	2.96268	GR-356_Ctrl_10D_peak_2529
chr3	112391327	112391992	666	112391522	23.00	16.63569	7.57908	12.62046	GR-356_Ctrl_10D_peak_2530
chr3	112604511	112604828	318	112604672	13.00	11.03847	6.81076	7.26925	GR-356_Ctrl_10D_peak_2531
chr3	112653486	112653919	434	112653719	50.00	57.08785	19.96839	52.13218	GR-356_Ctrl_10D_peak_2532
chr3	112671995	112672355	361	112672154	47.00	32.36876	9.00019	27.88103	GR-356_Ctrl_10D_peak_2533
chr3	113830611	113830926	316	113830763	18.00	16.25263	8.74424	12.25068	GR-356_Ctrl_10D_peak_2534
chr3	115788958	115789411	454	115789201	15.00	11.01119	6.33735	7.24440	GR-356_Ctrl_10D_peak_2535
chr3	115790667	115790975	309	115790831	26.00	16.80506	6.94299	12.78369	GR-356_Ctrl_10D_peak_2536
chr3	123587000	123587409	410	123587119	20.00	18.95860	9.79690	14.85462	GR-356_Ctrl_10D_peak_2537
chr3	123732361	123732784	424	123732588	47.00	48.45967	16.51815	43.64832	GR-356_Ctrl_10D_peak_2538
chr3	123870061	123870263	203	123870124	12.00	8.29870	5.31827	4.69290	GR-356_Ctrl_10D_peak_2539
chr3	124248554	124248991	438	124248889	13.00	7.11342	4.42113	3.60941	GR-356_Ctrl_10D_peak_2540
chr3	124832633	124832880	248	124832714	15.00	11.35453	6.54556	7.56438	GR-356_Ctrl_10D_peak_2541
chr3	124878616	124879222	607	124879001	32.00	26.77034	10.42124	22.42191	GR-356_Ctrl_10D_peak_2542
chr3	125063027	125063469	443	125063285	42.00	41.54541	14.79751	36.86676	GR-356_Ctrl_10D_peak_2543
chr3	125110677	125110887	211	125110782	15.00	11.25988	6.48805	7.47609	GR-356_Ctrl_10D_peak_2544
chr3	125140449	125140714	266	125140536	20.00	11.22712	5.40011	7.44680	GR-356_Ctrl_10D_peak_2545
chr3	126057300	126057571	272	126057414	21.00	22.75427	11.77174	18.52430	GR-356_Ctrl_10D_peak_2546
chr3	126267369	126267597	229	126267476	16.00	12.42749	6.95465	8.58616	GR-356_Ctrl_10D_peak_2547
chr3	126911515	126911749	235	126911578	17.00	10.65101	5.68431	6.89792	GR-356_Ctrl_10D_peak_2548
chr3	127304193	127304654	462	127304412	73.00	112.40871	39.59585	106.69573	GR-356_Ctrl_10D_peak_2549
chr3	127588945	127589280	336	127589108	37.00	37.51375	14.54446	32.91940	GR-356_Ctrl_10D_peak_2550
chr3	127734824	127735057	234	127734937	16.00	12.42749	6.95465	8.58616	GR-356_Ctrl_10D_peak_2551
chr3	127889524	127889727	204	127889688	13.00	12.14649	7.49111	8.31795	GR-356_Ctrl_10D_peak_2552
chr3	129195728	129196141	414	129195946	23.00	13.93699	6.17155	10.02573	GR-356_Ctrl_10D_peak_2553
chr3	129485731	129485958	228	129485822	17.00	10.65101	5.68431	6.89792	GR-356_Ctrl_10D_peak_2554
chr3	129888710	129889106	397	129888947	16.00	13.85411	7.82380	9.94685	GR-356_Ctrl_10D_peak_2555
chr3	130037203	130037616	414	130037371	11.00	5.51391	3.78954	2.15920	GR-356_Ctrl_10D_peak_2556
chr3	131110200	131110531	332	131110333	17.00	13.52504	7.36375	9.63421	GR-356_Ctrl_10D_peak_2557
chr3	131216819	131217271	453	131217074	45.00	59.72028	23.91318	54.71904	GR-356_Ctrl_10D_peak_2558
chr3	132134632	132134886	255	132134759	21.00	21.22910	10.85749	17.04897	GR-356_Ctrl_10D_peak_2559
chr3	132136035	132136302	268	132136189	10.00	8.41791	5.76229	4.80581	GR-356_Ctrl_10D_peak_2560
chr3	132543044	132543350	307	132543154	17.00	10.65101	5.68431	6.89792	GR-356_Ctrl_10D_peak_2561
chr3	133568241	133569020	780	133568861	35.00	27.51314	9.89302	23.14478	GR-356_Ctrl_10D_peak_2562
chr3	133821812	133822016	205	133821930	14.00	9.65783	5.74123	5.96542	GR-356_Ctrl_10D_peak_2563
chr3	133943536	133944170	635	133943791	32.00	26.77034	10.42124	22.42191	GR-356_Ctrl_10D_peak_2564
chr3	133944940	133945499	560	133945223	66.00	92.27087	31.91154	86.80517	GR-356_Ctrl_10D_peak_2565
chr3	134008547	134009148	602	134008854	30.00	33.81291	15.18929	29.29411	GR-356_Ctrl_10D_peak_2566
chr3	134104082	134104371	290	134104202	20.00	21.24224	11.17233	17.06107	GR-356_Ctrl_10D_peak_2567
chr3	134313387	134313656	270	134313534	23.00	22.74436	11.12039	18.51683	GR-356_Ctrl_10D_peak_2568
chr3	134326783	134327248	466	134326980	33.00	33.43903	13.78711	28.93029	GR-356_Ctrl_10D_peak_2569
chr3	138188019	138188442	424	138188286	47.00	40.20762	12.34310	35.55635	GR-356_Ctrl_10D_peak_2570
chr3	138694433	138694635	203	138694628	12.00	6.29799	4.10534	2.87237	GR-356_Ctrl_10D_peak_2571
chr3	139302268	139302632	365	139302439	27.00	20.09864	8.36891	15.95478	GR-356_Ctrl_10D_peak_2572
chr3	140529282	140529586	305	140529442	13.00	9.28838	5.72736	5.61672	GR-356_Ctrl_10D_peak_2573
chr3	141274953	141275317	365	141275141	31.00	30.91800	13.09111	26.46207	GR-356_Ctrl_10D_peak_2574
chr3	141276421	141276704	284	141276547	24.00	25.95194	12.70578	21.62501	GR-356_Ctrl_10D_peak_2575
chr3	141331743	141332237	495	141331996	32.00	26.77034	10.42124	22.42191	GR-356_Ctrl_10D_peak_2576
chr3	141366447	141366967	521	141366614	60.00	51.23231	13.22919	46.37220	GR-356_Ctrl_10D_peak_2577
chr3	141367255	141367683	429	141367488	39.00	35.39782	12.63181	30.83960	GR-356_Ctrl_10D_peak_2578
chr3	141368168	141368557	390	141368355	44.00	32.51730	9.75924	28.02608	GR-356_Ctrl_10D_peak_2579
chr3	142498542	142498794	253	142498649	15.00	14.24963	8.31763	10.33159	GR-356_Ctrl_10D_peak_2580
chr3	142501404	142501648	245	142501507	16.00	12.32642	6.89355	8.49305	GR-356_Ctrl_10D_peak_2581
chr3	146506703	146506939	237	146506878	12.00	9.30144	5.94281	5.62936	GR-356_Ctrl_10D_peak_2582
chr3	146550997	146551436	440	146551245	50.00	58.66156	20.86396	53.67663	GR-356_Ctrl_10D_peak_2583
chr3	146746240	146746602	363	146746404	13.00	9.28838	5.72736	5.61672	GR-356_Ctrl_10D_peak_2584
chr3	148319806	148320008	203	148319820	12.00	6.29799	4.10534	2.87237	GR-356_Ctrl_10D_peak_2585
chr3	149180165	149180423	259	149180252	20.00	14.61480	7.22669	10.67925	GR-356_Ctrl_10D_peak_2586
chr3	149580044	149580442	399	149580311	21.00	16.91475	8.28107	12.88853	GR-356_Ctrl_10D_peak_2587
chr3	150147376	150147680	305	150147553	32.00	20.05657	7.15677	15.91368	GR-356_Ctrl_10D_peak_2588
chr3	150348478	150348836	359	150348687	15.00	11.25988	6.48805	7.47609	GR-356_Ctrl_10D_peak_2589
chr3	150371788	150372170	383	150371953	33.00	18.64333	6.37514	14.55323	GR-356_Ctrl_10D_peak_2590
chr3	150469515	150469882	368	150469686	30.00	20.84636	7.97159	16.68005	GR-356_Ctrl_10D_peak_2591
chr3	150470537	150470739	203	150470594	15.00	11.93237	6.89814	8.11718	GR-356_Ctrl_10D_peak_2592
chr3	152328966	152329215	250	152329048	12.00	7.74386	4.97573	4.18694	GR-356_Ctrl_10D_peak_2593
chr3	154795533	154795992	460	154795721	20.00	16.01727	8.03773	12.02110	GR-356_Ctrl_10D_peak_2594
chr3	156602591	156602882	292	156602728	29.00	23.25980	9.47386	19.00767	GR-356_Ctrl_10D_peak_2595
chr3	156615581	156616168	588	156615939	27.00	31.41222	14.89644	26.94921	GR-356_Ctrl_10D_peak_2596
chr3	156784147	156784413	267	156784277	13.00	9.20658	5.67704	5.54393	GR-356_Ctrl_10D_peak_2597
chr3	156816896	156817564	669	156817241	82.00	97.65590	26.21100	92.12290	GR-356_Ctrl_10D_peak_2598
chr3	157122183	157122470	288	157122291	20.00	16.82593	8.51557	12.80157	GR-356_Ctrl_10D_peak_2599
chr3	157128252	157128555	304	157128391	23.00	17.86373	8.25908	13.80007	GR-356_Ctrl_10D_peak_2600
chr3	157360037	157360492	456	157360236	44.00	53.45993	20.71005	48.56406	GR-356_Ctrl_10D_peak_2601
chr3	159824317	159824793	477	159824551	41.00	33.02191	10.80021	28.52013	GR-356_Ctrl_10D_peak_2602
chr3	159854604	159855108	505	159854880	40.00	25.24993	7.68767	20.94737	GR-356_Ctrl_10D_peak_2603
chr3	159872455	159873127	673	159872931	36.00	27.31246	9.51447	22.94630	GR-356_Ctrl_10D_peak_2604
chr3	159928773	159929016	244	159928910	19.00	11.48192	5.72685	7.69008	GR-356_Ctrl_10D_peak_2605
chr3	166985211	166985561	351	166985369	23.00	25.49584	12.76838	21.18439	GR-356_Ctrl_10D_peak_2606
chr3	170909551	170909831	281	170909669	13.00	7.11342	4.42113	3.60941	GR-356_Ctrl_10D_peak_2607
chr3	171192252	171192618	367	171192533	18.00	9.51884	4.88581	5.83557	GR-356_Ctrl_10D_peak_2608
chr3	171356280	171356558	279	171356440	14.00	7.95815	4.73693	4.37816	GR-356_Ctrl_10D_peak_2609
chr3	171876775	171877152	378	171876964	49.00	42.67640	12.85740	37.97272	GR-356_Ctrl_10D_peak_2610
chr3	172129990	172130192	203	172130076	15.00	10.11215	5.79860	6.39343	GR-356_Ctrl_10D_peak_2611
chr3	172140557	172141015	459	172140850	29.00	25.80228	10.87238	21.47580	GR-356_Ctrl_10D_peak_2612
chr3	172153328	172153530	203	172153451	17.00	10.65101	5.68431	6.89792	GR-356_Ctrl_10D_peak_2613
chr3	174949572	174949791	220	174949678	15.00	13.19706	7.67425	9.32432	GR-356_Ctrl_10D_peak_2614
chr3	177125952	177126210	259	177126115	17.00	14.18108	7.76041	10.26550	GR-356_Ctrl_10D_peak_2615
chr3	177338041	177338297	257	177338163	16.00	13.04442	7.32928	9.17460	GR-356_Ctrl_10D_peak_2616
chr3	177345669	177346005	337	177345839	17.00	12.73252	6.88948	8.87421	GR-356_Ctrl_10D_peak_2617
chr3	177468401	177468684	284	177468579	18.00	14.64586	7.77285	10.70526	GR-356_Ctrl_10D_peak_2618
chr3	177478514	177478937	424	177478684	30.00	27.04912	11.23479	22.69165	GR-356_Ctrl_10D_peak_2619
chr3	177590010	177590321	312	177590169	24.00	21.64832	10.13758	17.45436	GR-356_Ctrl_10D_peak_2620
chr3	177592689	177593066	378	177592848	41.00	52.98854	21.83377	48.09598	GR-356_Ctrl_10D_peak_2621
chr3	177744803	177745112	310	177744952	38.00	33.89251	12.19090	29.37231	GR-356_Ctrl_10D_peak_2622
chr3	177770835	177771124	290	177770993	27.00	26.66585	12.07175	22.32523	GR-356_Ctrl_10D_peak_2623
chr3	177776641	177777070	430	177776822	22.00	19.34005	9.40924	15.22368	GR-356_Ctrl_10D_peak_2624
chr3	177835009	177835306	298	177835147	22.00	19.34005	9.40924	15.22368	GR-356_Ctrl_10D_peak_2625
chr3	177835958	177836252	295	177836103	36.00	31.63035	11.68442	27.16101	GR-356_Ctrl_10D_peak_2626
chr3	177893293	177893592	300	177893462	31.00	30.91800	13.09111	26.46207	GR-356_Ctrl_10D_peak_2627
chr3	178170685	178171037	353	178170861	35.00	26.20401	9.25733	21.87060	GR-356_Ctrl_10D_peak_2628
chr3	178382428	178382995	568	178382590	20.00	18.84848	9.73034	14.74697	GR-356_Ctrl_10D_peak_2629
chr3	183370792	183371494	703	183370981	94.00	122.22372	32.69218	116.39155	GR-356_Ctrl_10D_peak_2630
chr3	185656269	185656678	410	185656447	27.00	17.79320	7.20014	13.73126	GR-356_Ctrl_10D_peak_2631
chr3	185658495	185659048	554	185658769	67.00	74.48846	21.47407	69.25880	GR-356_Ctrl_10D_peak_2632
chr3	185732799	185733256	458	185732989	30.00	28.15899	11.86521	23.77612	GR-356_Ctrl_10D_peak_2633
chr3	188061249	188061502	254	188061347	21.00	20.47983	10.40575	16.32644	GR-356_Ctrl_10D_peak_2634
chr3	188221016	188221429	414	188221216	42.00	55.54922	22.87668	50.62082	GR-356_Ctrl_10D_peak_2635
chr3	188263020	188263275	256	188263167	25.00	18.78006	8.21068	14.68246	GR-356_Ctrl_10D_peak_2636
chr3	188266135	188266397	263	188266317	18.00	13.14795	6.88584	9.27546	GR-356_Ctrl_10D_peak_2637
chr3	188267088	188267317	230	188267169	19.00	11.94822	5.97779	8.13198	GR-356_Ctrl_10D_peak_2638
chr3	188286222	188286529	308	188286390	26.00	14.48959	5.85554	10.56558	GR-356_Ctrl_10D_peak_2639
chr3	188290465	188290928	464	188290657	21.00	18.13681	9.00014	14.06386	GR-356_Ctrl_10D_peak_2640
chr3	188319491	188319737	247	188319604	18.00	14.53192	7.70456	10.60465	GR-356_Ctrl_10D_peak_2641
chr3	188947948	188948373	426	188948119	44.00	45.78479	16.30856	41.02055	GR-356_Ctrl_10D_peak_2642
chr3	189324826	189325028	203	189324927	16.00	9.72846	5.36852	6.02673	GR-356_Ctrl_10D_peak_2643
chr3	189588595	189588800	206	189588762	10.00	6.35418	4.46053	2.91814	GR-356_Ctrl_10D_peak_2644
chr3	190003799	190004109	311	190003861	17.00	7.24685	3.90370	3.73324	GR-356_Ctrl_10D_peak_2645
chr3	191066733	191067096	364	191066911	19.00	17.48569	9.20447	13.43903	GR-356_Ctrl_10D_peak_2646
chr3	192884733	192885079	347	192884932	24.00	20.95648	9.73256	16.78938	GR-356_Ctrl_10D_peak_2647
chr3	193864008	193864312	305	193864135	21.00	18.00353	8.92107	13.93598	GR-356_Ctrl_10D_peak_2648
chr3	193868898	193869186	289	193869013	17.00	14.51243	7.96170	10.58832	GR-356_Ctrl_10D_peak_2649
chr3	193872464	193872709	246	193872619	17.00	10.65101	5.68431	6.89792	GR-356_Ctrl_10D_peak_2650
chr3	194296452	194296668	217	194296564	19.00	10.36255	5.14296	6.62581	GR-356_Ctrl_10D_peak_2651
chr3	194572384	194572711	328	194572563	26.00	26.24487	12.17950	21.91090	GR-356_Ctrl_10D_peak_2652
chr3	194640182	194640431	250	194640360	11.00	7.27170	4.86604	3.75222	GR-356_Ctrl_10D_peak_2653
chr3	195119561	195120075	515	195119899	25.00	18.78006	8.21068	14.68246	GR-356_Ctrl_10D_peak_2654
chr3	196654686	196655093	408	196654886	32.00	32.27741	13.50021	27.79223	GR-356_Ctrl_10D_peak_2655
chr3	196726905	196727120	216	196726942	19.00	7.43271	3.75008	3.89296	GR-356_Ctrl_10D_peak_2656
chr3	196727413	196727704	292	196727549	13.00	7.11342	4.42113	3.60941	GR-356_Ctrl_10D_peak_2657
chr3	197352479	197352727	249	197352570	10.00	7.94746	5.46831	4.37451	GR-356_Ctrl_10D_peak_2658
chr3	197367386	197367668	283	197367516	10.00	6.41677	4.50007	2.96268	GR-356_Ctrl_10D_peak_2659
chr3	197392924	197393238	315	197393050	25.00	19.34340	8.51760	15.22627	GR-356_Ctrl_10D_peak_2660
chr3	197394667	197395107	441	197394847	38.00	34.13094	12.31601	29.60455	GR-356_Ctrl_10D_peak_2661
chr3	197487932	197488279	348	197488105	16.00	7.89826	4.37151	4.32601	GR-356_Ctrl_10D_peak_2662
chr3	197490109	197490351	243	197490202	19.00	12.44848	6.25174	8.60573	GR-356_Ctrl_10D_peak_2663
chr3	197719042	197719272	231	197719209	11.00	7.34068	4.90917	3.80450	GR-356_Ctrl_10D_peak_2664
chr4	1043714	1043929	216	1043797	11.00	8.31799	5.52268	4.70885	GR-356_Ctrl_10D_peak_2665
chr4	2330015	2330367	353	2330192	23.00	13.93699	6.17155	10.02573	GR-356_Ctrl_10D_peak_2666
chr4	2429961	2430246	286	2430055	10.00	6.79972	4.74247	3.31966	GR-356_Ctrl_10D_peak_2667
chr4	2937165	2937425	261	2937336	14.00	6.37500	3.85722	2.93436	GR-356_Ctrl_10D_peak_2668
chr4	3903595	3903854	260	3903746	15.00	10.65720	6.12398	6.90103	GR-356_Ctrl_10D_peak_2669
chr4	3904313	3904769	457	3904617	17.00	10.54790	5.62657	6.80508	GR-356_Ctrl_10D_peak_2670
chr4	4394619	4394821	203	4394665	11.00	7.34068	4.90917	3.80450	GR-356_Ctrl_10D_peak_2671
chr4	7022342	7022600	259	7022471	19.00	15.66840	8.11006	11.69225	GR-356_Ctrl_10D_peak_2672
chr4	7893516	7893773	258	7893658	15.00	12.00404	6.94202	8.18586	GR-356_Ctrl_10D_peak_2673
chr4	8101208	8101530	323	8101361	20.00	19.89701	10.36397	15.75988	GR-356_Ctrl_10D_peak_2674
chr4	8183517	8183800	284	8183663	19.00	19.86347	10.64032	15.73355	GR-356_Ctrl_10D_peak_2675
chr4	10129401	10129609	209	10129450	14.00	10.30761	6.13646	6.57570	GR-356_Ctrl_10D_peak_2676
chr4	10530394	10530623	230	10530483	13.00	11.88847	7.33382	8.07727	GR-356_Ctrl_10D_peak_2677
chr4	11505478	11505817	340	11505659	16.00	15.62809	8.90535	11.65498	GR-356_Ctrl_10D_peak_2678
chr4	11628483	11628733	251	11628608	14.00	11.86466	7.09483	8.05383	GR-356_Ctrl_10D_peak_2679
chr4	11635424	11635684	261	11635506	13.00	9.78813	6.03587	6.07882	GR-356_Ctrl_10D_peak_2680
chr4	13907425	13907823	399	13907575	35.00	23.01966	7.80739	18.78106	GR-356_Ctrl_10D_peak_2681
chr4	13980286	13980569	284	13980459	15.00	8.83037	5.05272	5.18296	GR-356_Ctrl_10D_peak_2682
chr4	14111745	14111963	219	14111875	17.00	17.17031	9.57629	13.13346	GR-356_Ctrl_10D_peak_2683
chr4	14446467	14446683	217	14446640	10.00	8.61749	5.88587	4.99608	GR-356_Ctrl_10D_peak_2684
chr4	14667903	14668225	323	14668077	25.00	28.55578	13.91205	24.15788	GR-356_Ctrl_10D_peak_2685
chr4	19983215	19983422	208	19983328	16.00	12.42749	6.95465	8.58616	GR-356_Ctrl_10D_peak_2686
chr4	24105603	24105936	334	24105803	13.00	9.78813	6.03587	6.07882	GR-356_Ctrl_10D_peak_2687
chr4	25694483	25694777	295	25694632	29.00	26.87443	11.48246	22.52304	GR-356_Ctrl_10D_peak_2688
chr4	28373634	28373948	315	28373812	13.00	12.07600	7.44822	8.25623	GR-356_Ctrl_10D_peak_2689
chr4	39036056	39036422	367	39036254	30.00	27.04912	11.23479	22.69165	GR-356_Ctrl_10D_peak_2690
chr4	39664855	39665204	350	39665047	18.00	18.60293	10.16650	14.51703	GR-356_Ctrl_10D_peak_2691
chr4	40183998	40184235	238	40184080	13.00	9.28838	5.72736	5.61672	GR-356_Ctrl_10D_peak_2692
chr4	40255605	40255970	366	40255817	23.00	22.61936	11.04536	18.39483	GR-356_Ctrl_10D_peak_2693
chr4	40548161	40548460	300	40548359	18.00	14.64586	7.77285	10.70526	GR-356_Ctrl_10D_peak_2694
chr4	41143122	41143640	519	41143443	50.00	60.61223	21.98783	55.59426	GR-356_Ctrl_10D_peak_2695
chr4	41160131	41160506	376	41160269	34.00	29.17595	11.05283	24.77007	GR-356_Ctrl_10D_peak_2696
chr4	41178670	41179021	352	41178855	12.00	8.29870	5.31827	4.69290	GR-356_Ctrl_10D_peak_2697
chr4	41507475	41507677	203	41507535	17.00	10.65101	5.68431	6.89792	GR-356_Ctrl_10D_peak_2698
chr4	48698441	48698862	422	48698665	18.00	12.54767	6.53844	8.70243	GR-356_Ctrl_10D_peak_2699
chr4	52822580	52822854	275	52822685	16.00	12.42749	6.95465	8.58616	GR-356_Ctrl_10D_peak_2700
chr4	52823272	52823758	487	52823589	43.00	40.56979	13.89499	35.90549	GR-356_Ctrl_10D_peak_2701
chr4	54064780	54065127	348	54064942	23.00	21.78775	10.54721	17.59305	GR-356_Ctrl_10D_peak_2702
chr4	54152868	54153211	344	54153059	21.00	14.56176	6.94749	10.62918	GR-356_Ctrl_10D_peak_2703
chr4	54568317	54568547	231	54568396	18.00	7.97287	4.12057	4.39107	GR-356_Ctrl_10D_peak_2704
chr4	55184061	55184438	378	55184250	20.00	13.55309	6.63170	9.65682	GR-356_Ctrl_10D_peak_2705
chr4	61443888	61444318	431	61444034	25.00	26.43607	12.64855	22.09963	GR-356_Ctrl_10D_peak_2706
chr4	61572246	61572512	267	61572354	18.00	18.60293	10.16650	14.51703	GR-356_Ctrl_10D_peak_2707
chr4	61583651	61584012	362	61583843	16.00	14.78004	8.38988	10.83391	GR-356_Ctrl_10D_peak_2708
chr4	71151038	71151317	280	71151181	20.00	13.55309	6.63170	9.65682	GR-356_Ctrl_10D_peak_2709
chr4	73661701	73661925	225	73661768	15.00	7.12379	4.11437	3.61532	GR-356_Ctrl_10D_peak_2710
chr4	73704624	73704901	278	73704785	21.00	12.11161	5.65725	8.28673	GR-356_Ctrl_10D_peak_2711
chr4	73740451	73740692	242	73740551	23.00	16.63569	7.57908	12.62046	GR-356_Ctrl_10D_peak_2712
chr4	73776305	73776651	347	73776496	13.00	9.28838	5.72736	5.61672	GR-356_Ctrl_10D_peak_2713
chr4	73856617	73856848	232	73856714	12.00	10.93743	6.95603	7.17142	GR-356_Ctrl_10D_peak_2714
chr4	73883212	73883540	329	73883383	20.00	16.95276	8.59104	12.92164	GR-356_Ctrl_10D_peak_2715
chr4	74006167	74006476	310	74006304	20.00	21.35004	11.23666	17.16300	GR-356_Ctrl_10D_peak_2716
chr4	74114383	74114665	283	74114532	18.00	12.54767	6.53844	8.70243	GR-356_Ctrl_10D_peak_2717
chr4	74374658	74374860	203	74374839	12.00	7.74386	4.97573	4.18694	GR-356_Ctrl_10D_peak_2718
chr4	74432992	74433245	254	74433048	10.00	8.61749	5.88587	4.99608	GR-356_Ctrl_10D_peak_2719
chr4	74473159	74473472	314	74473350	16.00	15.40568	8.77063	11.44066	GR-356_Ctrl_10D_peak_2720
chr4	74624779	74625102	324	74624909	23.00	13.93699	6.17155	10.02573	GR-356_Ctrl_10D_peak_2721
chr4	74632662	74632968	307	74632773	17.00	16.92602	9.42919	12.89956	GR-356_Ctrl_10D_peak_2722
chr4	75844283	75844563	281	75844395	17.00	13.41753	7.29906	9.53508	GR-356_Ctrl_10D_peak_2723
chr4	76703132	76703529	398	76703327	31.00	21.89208	8.22873	17.68758	GR-356_Ctrl_10D_peak_2724
chr4	76704105	76704598	494	76704424	21.00	18.00353	8.92107	13.93598	GR-356_Ctrl_10D_peak_2725
chr4	76724007	76724209	203	76724143	13.00	9.28838	5.72736	5.61672	GR-356_Ctrl_10D_peak_2726
chr4	76987248	76987906	659	76987350	14.00	10.16051	6.04660	6.44151	GR-356_Ctrl_10D_peak_2727
chr4	77172276	77172620	345	77172413	16.00	11.09999	6.16101	7.32616	GR-356_Ctrl_10D_peak_2728
chr4	77564172	77564479	308	77564328	20.00	19.89701	10.36397	15.75988	GR-356_Ctrl_10D_peak_2729
chr4	77921683	77922058	376	77921874	49.00	38.13800	10.84360	33.52176	GR-356_Ctrl_10D_peak_2730
chr4	83267534	83267780	247	83267624	13.00	12.14649	7.49111	8.31795	GR-356_Ctrl_10D_peak_2731
chr4	83357302	83357633	332	83357468	17.00	13.41753	7.29906	9.53508	GR-356_Ctrl_10D_peak_2732
chr4	83358323	83358778	456	83358608	17.00	13.52504	7.36375	9.63421	GR-356_Ctrl_10D_peak_2733
chr4	84691492	84691767	276	84691702	12.00	9.36569	5.98290	5.68975	GR-356_Ctrl_10D_peak_2734
chr4	85783637	85783839	203	85783656	15.00	8.83037	5.05272	5.18296	GR-356_Ctrl_10D_peak_2735
chr4	86033186	86033388	203	86033310	14.00	10.21939	6.08255	6.49609	GR-356_Ctrl_10D_peak_2736
chr4	87342260	87342555	296	87342453	23.00	22.61936	11.04536	18.39483	GR-356_Ctrl_10D_peak_2737
chr4	88612218	88612654	437	88612448	43.00	35.37877	11.31451	30.82545	GR-356_Ctrl_10D_peak_2738
chr4	94516011	94516324	314	94516169	30.00	29.38058	12.57060	24.96702	GR-356_Ctrl_10D_peak_2739
chr4	98446751	98447000	250	98446841	20.00	16.95276	8.59104	12.92164	GR-356_Ctrl_10D_peak_2740
chr4	98557647	98557849	203	98557767	10.00	7.88452	5.42875	4.31631	GR-356_Ctrl_10D_peak_2741
chr4	101284559	101284761	203	101284666	8.00	6.44733	4.81571	2.98262	GR-356_Ctrl_10D_peak_2742
chr4	102390509	102390711	203	102390623	10.00	7.30453	5.06246	3.78107	GR-356_Ctrl_10D_peak_2743
chr4	102717569	102717830	262	102717718	15.00	14.24963	8.31763	10.33159	GR-356_Ctrl_10D_peak_2744
chr4	106444756	106444986	231	106444861	11.00	8.82037	5.83779	5.18096	GR-356_Ctrl_10D_peak_2745
chr4	106583604	106583807	204	106583693	11.00	5.51391	3.78954	2.15920	GR-356_Ctrl_10D_peak_2746
chr4	110533915	110534302	388	110534102	26.00	28.16264	13.32510	23.77859	GR-356_Ctrl_10D_peak_2747
chr4	114383134	114383398	265	114383283	18.00	18.60293	10.16650	14.51703	GR-356_Ctrl_10D_peak_2748
chr4	121690782	121691072	291	121690884	19.00	16.52311	8.62268	12.51361	GR-356_Ctrl_10D_peak_2749
chr4	121729024	121729351	328	121729054	10.00	5.95660	4.21024	2.55349	GR-356_Ctrl_10D_peak_2750
chr4	122666781	122667172	392	122666971	36.00	31.63035	11.68442	27.16101	GR-356_Ctrl_10D_peak_2751
chr4	122700185	122700548	364	122700367	25.00	24.02659	11.20948	19.75829	GR-356_Ctrl_10D_peak_2752
chr4	123121602	123121889	288	123121736	13.00	12.14649	7.49111	8.31795	GR-356_Ctrl_10D_peak_2753
chr4	123832243	123833056	814	123832854	35.00	26.20401	9.25733	21.87060	GR-356_Ctrl_10D_peak_2754
chr4	124943232	124943434	203	124943390	15.00	7.12379	4.11437	3.61532	GR-356_Ctrl_10D_peak_2755
chr4	125322116	125322544	429	125322214	19.00	12.56442	6.31590	8.71315	GR-356_Ctrl_10D_peak_2756
chr4	125389661	125390089	429	125389891	20.00	19.89701	10.36397	15.75988	GR-356_Ctrl_10D_peak_2757
chr4	128338738	128338975	238	128338905	16.00	12.32642	6.89355	8.49305	GR-356_Ctrl_10D_peak_2758
chr4	128354359	128354745	387	128354531	22.00	15.58957	7.26329	11.61718	GR-356_Ctrl_10D_peak_2759
chr4	128529217	128529419	203	128529312	14.00	11.55428	6.90335	7.75638	GR-356_Ctrl_10D_peak_2760
chr4	128571729	128572155	427	128571945	112.00	153.51776	38.88649	147.35316	GR-356_Ctrl_10D_peak_2761
chr4	141643609	141643827	219	141643664	15.00	8.83037	5.05272	5.18296	GR-356_Ctrl_10D_peak_2762
chr4	142088953	142089155	203	142089117	14.00	12.36472	7.40284	8.52987	GR-356_Ctrl_10D_peak_2763
chr4	144709164	144709441	278	144709328	24.00	22.96294	10.91635	18.72607	GR-356_Ctrl_10D_peak_2764
chr4	144710334	144710561	228	144710457	15.00	7.12379	4.11437	3.61532	GR-356_Ctrl_10D_peak_2765
chr4	145842297	145842518	222	145842408	15.00	9.61549	5.50605	5.92870	GR-356_Ctrl_10D_peak_2766
chr4	147782627	147782829	203	147782710	12.00	10.53143	6.70696	6.79009	GR-356_Ctrl_10D_peak_2767
chr4	147829531	147829831	301	147829697	15.00	14.04441	8.19275	10.13130	GR-356_Ctrl_10D_peak_2768
chr4	152106956	152107221	266	152107130	9.00	7.51202	5.35079	3.96361	GR-356_Ctrl_10D_peak_2769
chr4	152972788	152973159	372	152972945	18.00	14.64586	7.77285	10.70526	GR-356_Ctrl_10D_peak_2770
chr4	152981341	152981812	472	152981584	37.00	28.43243	9.77162	24.03705	GR-356_Ctrl_10D_peak_2771
chr4	152983828	152984438	611	152984271	21.00	12.11161	5.65725	8.28673	GR-356_Ctrl_10D_peak_2772
chr4	153651969	153652550	582	153652147	27.00	31.21735	14.78115	26.75685	GR-356_Ctrl_10D_peak_2773
chr4	154004806	154005159	354	154004962	37.00	47.20699	20.21660	42.41660	GR-356_Ctrl_10D_peak_2774
chr4	156476246	156476708	463	156476539	18.00	11.59671	6.00011	7.79238	GR-356_Ctrl_10D_peak_2775
chr4	156614949	156615596	648	156615200	84.00	130.63795	43.52397	124.72672	GR-356_Ctrl_10D_peak_2776
chr4	156774039	156774241	203	156774070	9.00	6.27999	4.57139	2.86371	GR-356_Ctrl_10D_peak_2777
chr4	156774532	156774969	438	156774732	22.00	13.01516	5.91440	9.14773	GR-356_Ctrl_10D_peak_2778
chr4	156946615	156946834	220	156946727	13.00	9.20658	5.67704	5.54393	GR-356_Ctrl_10D_peak_2779
chr4	156949391	156949706	316	156949540	26.00	24.32971	11.04563	20.04797	GR-356_Ctrl_10D_peak_2780
chr4	157004633	157004902	270	157004804	18.00	12.54767	6.53844	8.70243	GR-356_Ctrl_10D_peak_2781
chr4	159069954	159070354	401	159070186	31.00	36.70042	16.50943	32.11390	GR-356_Ctrl_10D_peak_2782
chr4	159390767	159391106	340	159390941	22.00	15.58957	7.26329	11.61718	GR-356_Ctrl_10D_peak_2783
chr4	159401947	159402310	364	159402139	42.00	39.26162	13.57919	34.62147	GR-356_Ctrl_10D_peak_2784
chr4	164204383	164204817	435	164204552	30.00	30.73746	13.36515	26.28953	GR-356_Ctrl_10D_peak_2785
chr4	165440598	165440800	203	165440750	9.00	7.51202	5.35079	3.96361	GR-356_Ctrl_10D_peak_2786
chr4	166435520	166436015	496	166435716	31.00	27.25895	11.01210	22.89597	GR-356_Ctrl_10D_peak_2787
chr4	166538518	166538720	203	166538652	11.00	9.76027	6.42095	6.05470	GR-356_Ctrl_10D_peak_2788
chr4	168162670	168162872	203	168162793	12.00	10.06080	6.41579	6.34686	GR-356_Ctrl_10D_peak_2789
chr4	168421834	168422129	296	168421988	19.00	14.90097	7.65498	10.94791	GR-356_Ctrl_10D_peak_2790
chr4	168796593	168796973	381	168796840	19.00	17.48569	9.20447	13.43903	GR-356_Ctrl_10D_peak_2791
chr4	169104143	169104412	270	169104285	22.00	19.34005	9.40924	15.22368	GR-356_Ctrl_10D_peak_2792
chr4	169282782	169282986	205	169282901	18.00	11.59671	6.00011	7.79238	GR-356_Ctrl_10D_peak_2793
chr4	173243294	173243541	248	173243348	20.00	13.55309	6.63170	9.65682	GR-356_Ctrl_10D_peak_2794
chr4	173252347	173252657	311	173252456	20.00	11.22712	5.40011	7.44680	GR-356_Ctrl_10D_peak_2795
chr4	175346128	175346663	536	175346337	23.00	13.93699	6.17155	10.02573	GR-356_Ctrl_10D_peak_2796
chr4	176270677	176270912	236	176270797	18.00	6.76303	3.56258	3.28705	GR-356_Ctrl_10D_peak_2797
chr4	176443242	176443514	273	176443319	23.00	13.93699	6.17155	10.02573	GR-356_Ctrl_10D_peak_2798
chr4	176883835	176884191	357	176883962	12.00	8.22331	5.27154	4.62849	GR-356_Ctrl_10D_peak_2799
chr4	181661194	181661569	376	181661383	18.00	18.60293	10.16650	14.51703	GR-356_Ctrl_10D_peak_2800
chr4	181662386	181662774	389	181662569	23.00	25.61965	12.84190	21.29597	GR-356_Ctrl_10D_peak_2801
chr4	182240312	182240555	244	182240427	16.00	13.85411	7.82380	9.94685	GR-356_Ctrl_10D_peak_2802
chr4	183348870	183349272	403	183349121	17.00	17.26211	9.63142	13.22009	GR-356_Ctrl_10D_peak_2803
chr4	183360078	183360429	352	183360251	25.00	18.78006	8.21068	14.68246	GR-356_Ctrl_10D_peak_2804
chr4	184793027	184793336	310	184793159	26.00	23.10785	10.33422	18.86118	GR-356_Ctrl_10D_peak_2805
chr4	184813391	184813807	417	184813639	32.00	26.77034	10.42124	22.42191	GR-356_Ctrl_10D_peak_2806
chr4	185713386	185713661	276	185713532	15.00	12.69114	7.36357	8.83583	GR-356_Ctrl_10D_peak_2807
chr4	185833090	185833352	263	185833188	21.00	18.13681	9.00014	14.06386	GR-356_Ctrl_10D_peak_2808
chr4	185910032	185910248	217	185910151	14.00	13.38527	8.02619	9.50636	GR-356_Ctrl_10D_peak_2809
chr4	185920119	185920506	388	185920310	34.00	42.33479	18.62055	37.63644	GR-356_Ctrl_10D_peak_2810
chr4	186546678	186547618	941	186546860	39.00	50.72124	21.40316	45.87033	GR-356_Ctrl_10D_peak_2811
chr4	186623169	186623480	312	186623377	17.00	10.54790	5.62657	6.80508	GR-356_Ctrl_10D_peak_2812
chr5	169253	169510	258	169366	22.00	15.58957	7.26329	11.61718	GR-356_Ctrl_10D_peak_2813
chr5	912400	912614	215	912465	12.00	7.74386	4.97573	4.18694	GR-356_Ctrl_10D_peak_2814
chr5	957488	957690	203	957614	18.00	7.97287	4.12057	4.39107	GR-356_Ctrl_10D_peak_2815
chr5	958795	959175	381	959065	22.00	20.84450	10.30697	16.68005	GR-356_Ctrl_10D_peak_2816
chr5	1555511	1555718	208	1555671	14.00	10.30761	6.13646	6.57570	GR-356_Ctrl_10D_peak_2817
chr5	2093791	2094178	388	2093979	29.00	28.23959	12.27292	23.85041	GR-356_Ctrl_10D_peak_2818
chr5	2656417	2656637	221	2656505	13.00	12.14649	7.49111	8.31795	GR-356_Ctrl_10D_peak_2819
chr5	2757817	2758272	456	2758082	49.00	56.79936	20.27516	51.85056	GR-356_Ctrl_10D_peak_2820
chr5	3310519	3310882	364	3310769	21.00	10.27760	4.77118	6.55237	GR-356_Ctrl_10D_peak_2821
chr5	3320600	3320857	258	3320704	15.00	8.83037	5.05272	5.18296	GR-356_Ctrl_10D_peak_2822
chr5	5187047	5187249	203	5187186	10.00	7.88452	5.42875	4.31631	GR-356_Ctrl_10D_peak_2823
chr5	5336043	5336352	310	5336244	15.00	11.35453	6.54556	7.56438	GR-356_Ctrl_10D_peak_2824
chr5	5350246	5350496	251	5350398	17.00	17.17031	9.57628	13.13346	GR-356_Ctrl_10D_peak_2825
chr5	5351541	5351811	271	5351699	15.00	8.83037	5.05272	5.18296	GR-356_Ctrl_10D_peak_2826
chr5	6519538	6519993	456	6519764	30.00	36.01145	16.49249	31.44858	GR-356_Ctrl_10D_peak_2827
chr5	7926665	7926904	240	7926758	12.00	10.87226	6.91621	7.11008	GR-356_Ctrl_10D_peak_2828
chr5	8829376	8829636	261	8829478	18.00	13.80571	7.27223	9.90112	GR-356_Ctrl_10D_peak_2829
chr5	9046668	9046945	278	9046800	16.00	7.89826	4.37151	4.32601	GR-356_Ctrl_10D_peak_2830
chr5	9060089	9060470	382	9060340	14.00	11.55428	6.90335	7.75638	GR-356_Ctrl_10D_peak_2831
chr5	10551241	10551647	407	10551462	30.00	29.57192	12.68202	25.14774	GR-356_Ctrl_10D_peak_2832
chr5	10595842	10596251	410	10596003	40.00	38.84795	14.10926	34.22490	GR-356_Ctrl_10D_peak_2833
chr5	10702093	10702398	306	10702294	24.00	21.64832	10.13758	17.45436	GR-356_Ctrl_10D_peak_2834
chr5	14008781	14009130	350	14008978	15.00	11.35453	6.54556	7.56438	GR-356_Ctrl_10D_peak_2835
chr5	14036707	14036953	247	14036800	20.00	16.01727	8.03773	12.02110	GR-356_Ctrl_10D_peak_2836
chr5	14038491	14038697	207	14038595	12.00	8.29870	5.31827	4.69290	GR-356_Ctrl_10D_peak_2837
chr5	14190407	14190609	203	14190532	15.00	8.83037	5.05272	5.18296	GR-356_Ctrl_10D_peak_2838
chr5	14265502	14265846	345	14265649	26.00	20.46375	8.84521	16.31133	GR-356_Ctrl_10D_peak_2839
chr5	14268274	14268626	353	14268454	33.00	33.64975	13.90931	29.13270	GR-356_Ctrl_10D_peak_2840
chr5	14305022	14305230	209	14305169	18.00	11.59671	6.00011	7.79238	GR-356_Ctrl_10D_peak_2841
chr5	14406489	14406873	385	14406685	25.00	25.85005	12.29771	21.52339	GR-356_Ctrl_10D_peak_2842
chr5	16467514	16467716	203	16467637	18.00	7.97287	4.12057	4.39107	GR-356_Ctrl_10D_peak_2843
chr5	16539321	16539551	231	16539469	11.00	9.31250	6.14456	5.63976	GR-356_Ctrl_10D_peak_2844
chr5	16540589	16540791	203	16540692	12.00	10.06080	6.41579	6.34686	GR-356_Ctrl_10D_peak_2845
chr5	17249409	17249618	210	17249567	12.00	9.36569	5.98290	5.68975	GR-356_Ctrl_10D_peak_2846
chr5	28523969	28524232	264	28524049	10.00	6.41677	4.50007	2.96268	GR-356_Ctrl_10D_peak_2847
chr5	28542922	28543230	309	28543097	16.00	7.89826	4.37151	4.32601	GR-356_Ctrl_10D_peak_2848
chr5	31988208	31988642	435	31988417	78.00	116.99007	39.27242	111.21852	GR-356_Ctrl_10D_peak_2849
chr5	31990801	31991156	356	31990980	42.00	42.97801	15.58374	38.26789	GR-356_Ctrl_10D_peak_2850
chr5	32028132	32028357	226	32028205	15.00	8.83037	5.05272	5.18296	GR-356_Ctrl_10D_peak_2851
chr5	32033066	32033402	337	32033202	32.00	32.07315	13.38160	27.59659	GR-356_Ctrl_10D_peak_2852
chr5	32225535	32225813	279	32225674	15.00	14.57073	8.51225	10.63709	GR-356_Ctrl_10D_peak_2853
chr5	32642685	32642887	203	32642815	11.00	9.62012	6.33478	5.93302	GR-356_Ctrl_10D_peak_2854
chr5	32768071	32768408	338	32768254	15.00	14.65187	8.56126	10.70843	GR-356_Ctrl_10D_peak_2855
chr5	32785590	32786061	472	32785791	60.00	74.19633	24.73569	68.97134	GR-356_Ctrl_10D_peak_2856
chr5	32852439	32852778	340	32852629	23.00	25.00561	12.47644	20.70926	GR-356_Ctrl_10D_peak_2857
chr5	33788906	33789287	382	33789094	41.00	48.51635	19.19984	43.70445	GR-356_Ctrl_10D_peak_2858
chr5	34412922	34413221	300	34413066	19.00	19.96593	10.70158	15.82610	GR-356_Ctrl_10D_peak_2859
chr5	35046812	35047156	345	35047013	13.00	11.61892	7.16865	7.81423	GR-356_Ctrl_10D_peak_2860
chr5	35919286	35919505	220	35919391	16.00	10.56882	5.85018	6.82410	GR-356_Ctrl_10D_peak_2861
chr5	36374330	36374833	504	36374556	85.00	124.93265	39.57921	119.07720	GR-356_Ctrl_10D_peak_2862
chr5	36575426	36575794	369	36575620	31.00	29.45728	12.24796	25.04061	GR-356_Ctrl_10D_peak_2863
chr5	36948011	36948221	211	36948143	14.00	10.40001	6.19300	6.66252	GR-356_Ctrl_10D_peak_2864
chr5	37738315	37738634	320	37738441	20.00	8.12304	3.93758	4.53799	GR-356_Ctrl_10D_peak_2865
chr5	37771753	37772123	371	37771988	20.00	11.22712	5.40011	7.44680	GR-356_Ctrl_10D_peak_2866
chr5	38464186	38464567	382	38464385	25.00	11.85501	4.87510	8.04458	GR-356_Ctrl_10D_peak_2867
chr5	38607403	38607761	359	38607588	31.00	28.30970	11.59720	23.91870	GR-356_Ctrl_10D_peak_2868
chr5	38667022	38667288	267	38667149	15.00	14.65187	8.56126	10.70843	GR-356_Ctrl_10D_peak_2869
chr5	38806840	38807121	282	38806949	21.00	18.13681	9.00014	14.06386	GR-356_Ctrl_10D_peak_2870
chr5	40552210	40552571	362	40552395	38.00	29.56363	10.02877	25.14299	GR-356_Ctrl_10D_peak_2871
chr5	42840434	42840670	237	42840490	11.00	5.51391	3.78954	2.15920	GR-356_Ctrl_10D_peak_2872
chr5	43058179	43058592	414	43058348	35.00	30.39722	11.36863	25.95806	GR-356_Ctrl_10D_peak_2873
chr5	50593705	50593942	238	50593864	22.00	13.01516	5.91440	9.14773	GR-356_Ctrl_10D_peak_2874
chr5	51495817	51496067	251	51495923	18.00	11.59671	6.00011	7.79238	GR-356_Ctrl_10D_peak_2875
chr5	52783387	52783589	203	52783548	10.00	6.18992	4.35693	2.77712	GR-356_Ctrl_10D_peak_2876
chr5	52893256	52893497	242	52893389	17.00	10.65101	5.68431	6.89792	GR-356_Ctrl_10D_peak_2877
chr5	52922443	52922690	248	52922561	20.00	9.48921	4.55431	5.80980	GR-356_Ctrl_10D_peak_2878
chr5	53253520	53253809	290	53253695	19.00	10.63634	5.28327	6.89007	GR-356_Ctrl_10D_peak_2879
chr5	53323917	53324219	303	53324022	16.00	11.80609	6.58058	7.99635	GR-356_Ctrl_10D_peak_2880
chr5	53360838	53361157	320	53361069	22.00	11.08498	4.98806	7.31317	GR-356_Ctrl_10D_peak_2881
chr5	54643741	54644048	308	54643918	15.00	7.98919	4.58148	4.40650	GR-356_Ctrl_10D_peak_2882
chr5	54701073	54701465	393	54701273	11.00	5.51391	3.78954	2.15920	GR-356_Ctrl_10D_peak_2883
chr5	54807475	54807747	273	54807565	14.00	10.30761	6.13646	6.57570	GR-356_Ctrl_10D_peak_2884
chr5	55601307	55601560	254	55601388	13.00	8.21603	5.07378	4.62604	GR-356_Ctrl_10D_peak_2885
chr5	55995153	55995430	278	55995295	29.00	24.82092	10.32385	20.52627	GR-356_Ctrl_10D_peak_2886
chr5	56123714	56124096	383	56123932	38.00	27.83937	9.22999	23.46877	GR-356_Ctrl_10D_peak_2887
chr5	56211530	56211849	320	56211704	26.00	19.87698	8.52647	15.74164	GR-356_Ctrl_10D_peak_2888
chr5	56350657	56350908	252	56350906	15.00	6.24430	3.65968	2.82877	GR-356_Ctrl_10D_peak_2889
chr5	56625603	56625929	327	56625747	16.00	9.72846	5.36852	6.02673	GR-356_Ctrl_10D_peak_2890
chr5	56757074	56757456	383	56757266	30.00	24.41639	9.78965	20.12776	GR-356_Ctrl_10D_peak_2891
chr5	57825033	57825357	325	57825167	16.00	6.54374	3.68682	3.07554	GR-356_Ctrl_10D_peak_2892
chr5	57889279	57889806	528	57889635	25.00	15.83259	6.68585	11.84545	GR-356_Ctrl_10D_peak_2893
chr5	59042136	59042457	322	59042260	33.00	27.96687	10.73704	23.59138	GR-356_Ctrl_10D_peak_2894
chr5	59079996	59080242	247	59080160	17.00	11.54664	6.19431	7.75095	GR-356_Ctrl_10D_peak_2895
chr5	59526071	59526273	203	59526167	22.00	17.50084	8.33549	13.45208	GR-356_Ctrl_10D_peak_2896
chr5	59786593	59786795	203	59786734	21.00	11.58162	5.39381	7.78350	GR-356_Ctrl_10D_peak_2897
chr5	61051406	61051619	214	61051481	15.00	8.35106	4.78224	4.73985	GR-356_Ctrl_10D_peak_2898
chr5	61312491	61312733	243	61312601	37.00	23.14724	7.44368	18.90014	GR-356_Ctrl_10D_peak_2899
chr5	61314012	61314365	354	61314189	16.00	7.80594	4.32334	4.24307	GR-356_Ctrl_10D_peak_2900
chr5	61323097	61323333	237	61323274	13.00	5.65348	3.60007	2.27384	GR-356_Ctrl_10D_peak_2901
chr5	65190329	65190846	518	65190489	39.00	35.39782	12.63181	30.83960	GR-356_Ctrl_10D_peak_2902
chr5	65198765	65199080	316	65198920	38.00	27.83937	9.22999	23.46877	GR-356_Ctrl_10D_peak_2903
chr5	65203817	65204056	240	65203949	24.00	13.81975	5.91666	9.91478	GR-356_Ctrl_10D_peak_2904
chr5	65823226	65823444	219	65823334	23.00	11.91056	5.20493	8.09781	GR-356_Ctrl_10D_peak_2905
chr5	65830847	65831078	232	65830985	17.00	12.79790	6.92836	8.93789	GR-356_Ctrl_10D_peak_2906
chr5	65861819	65862247	429	65862052	19.00	10.36255	5.14296	6.62581	GR-356_Ctrl_10D_peak_2907
chr5	67206920	67207265	346	67207127	19.00	7.43271	3.75008	3.89296	GR-356_Ctrl_10D_peak_2908
chr5	67248746	67249032	287	67248888	17.00	13.52504	7.36375	9.63421	GR-356_Ctrl_10D_peak_2909
chr5	67268108	67268662	555	67268439	41.00	37.96341	13.26340	33.35011	GR-356_Ctrl_10D_peak_2910
chr5	67301486	67301711	226	67301577	22.00	11.08498	4.98806	7.31317	GR-356_Ctrl_10D_peak_2911
chr5	68333977	68334553	577	68334413	29.00	24.82092	10.32385	20.52627	GR-356_Ctrl_10D_peak_2912
chr5	68343349	68343675	327	68343510	32.00	22.95109	8.48588	18.71434	GR-356_Ctrl_10D_peak_2913
chr5	68434144	68434375	232	68434276	16.00	9.72846	5.36852	6.02673	GR-356_Ctrl_10D_peak_2914
chr5	69450196	69450483	288	69450354	10.00	6.48236	4.54153	3.01698	GR-356_Ctrl_10D_peak_2915
chr5	69502815	69503066	252	69502930	16.00	11.09999	6.16101	7.32616	GR-356_Ctrl_10D_peak_2916
chr5	71892006	71892261	256	71892172	17.00	11.54664	6.19431	7.75095	GR-356_Ctrl_10D_peak_2917
chr5	72139011	72139213	203	72139152	15.00	8.35106	4.78224	4.73985	GR-356_Ctrl_10D_peak_2918
chr5	72252635	72252872	238	72252768	33.00	21.03188	7.37365	16.85503	GR-356_Ctrl_10D_peak_2919
chr5	72388014	72388339	326	72388203	36.00	21.67736	7.04546	17.48326	GR-356_Ctrl_10D_peak_2920
chr5	72468094	72468316	223	72468164	17.00	10.78295	5.75852	7.02543	GR-356_Ctrl_10D_peak_2921
chr5	72470776	72471224	449	72470999	98.00	94.78841	18.56290	89.29079	GR-356_Ctrl_10D_peak_2922
chr5	73370679	73370892	214	73370828	23.00	13.79978	6.10354	9.89778	GR-356_Ctrl_10D_peak_2923
chr5	73796750	73796952	203	73796880	15.00	10.65720	6.12398	6.90103	GR-356_Ctrl_10D_peak_2924
chr5	74034762	74035045	284	74034893	17.00	10.65101	5.68431	6.89792	GR-356_Ctrl_10D_peak_2925
chr5	74040201	74040405	205	74040321	15.00	8.83037	5.05272	5.18296	GR-356_Ctrl_10D_peak_2926
chr5	74063769	74064081	313	74063906	21.00	12.11161	5.65725	8.28673	GR-356_Ctrl_10D_peak_2927
chr5	74327077	74327279	203	74327147	17.00	8.69704	4.62866	5.06540	GR-356_Ctrl_10D_peak_2928
chr5	74422686	74422952	267	74422795	16.00	10.08143	5.56920	6.36625	GR-356_Ctrl_10D_peak_2929
chr5	74543539	74543974	436	74543721	27.00	17.79320	7.20014	13.73126	GR-356_Ctrl_10D_peak_2930
chr5	74630821	74631089	269	74630967	16.00	9.21498	5.08113	5.55103	GR-356_Ctrl_10D_peak_2931
chr5	76689397	76689684	288	76689545	15.00	9.61549	5.50605	5.92870	GR-356_Ctrl_10D_peak_2932
chr5	76691286	76691780	495	76691430	18.00	13.87504	7.31327	9.96769	GR-356_Ctrl_10D_peak_2933
chr5	76805998	76806348	351	76806146	32.00	21.51322	7.80999	17.32354	GR-356_Ctrl_10D_peak_2934
chr5	76807380	76807596	217	76807493	18.00	6.76303	3.56258	3.28705	GR-356_Ctrl_10D_peak_2935
chr5	76823520	76823925	406	76823704	18.00	11.59671	6.00011	7.79238	GR-356_Ctrl_10D_peak_2936
chr5	77103497	77103705	209	77103596	15.00	8.83037	5.05272	5.18296	GR-356_Ctrl_10D_peak_2937
chr5	77133133	77133335	203	77133189	14.00	8.26455	4.91400	4.66776	GR-356_Ctrl_10D_peak_2938
chr5	77882832	77883041	210	77882886	14.00	9.65783	5.74123	5.96542	GR-356_Ctrl_10D_peak_2939
chr5	78518461	78518939	479	78518721	42.00	34.19537	11.05736	29.66572	GR-356_Ctrl_10D_peak_2940
chr5	78529648	78529850	203	78529788	21.00	7.65722	3.63311	4.10511	GR-356_Ctrl_10D_peak_2941
chr5	78601039	78601496	458	78601350	28.00	23.62295	9.97972	19.36412	GR-356_Ctrl_10D_peak_2942
chr5	78650567	78650798	232	78650692	20.00	15.86505	7.94852	11.87652	GR-356_Ctrl_10D_peak_2943
chr5	78699497	78700109	613	78699733	29.00	13.42967	4.95424	9.54682	GR-356_Ctrl_10D_peak_2944
chr5	81755271	81755645	375	81755448	47.00	35.86275	10.40985	31.30064	GR-356_Ctrl_10D_peak_2945
chr5	81789116	81789330	215	81789234	20.00	16.95276	8.59104	12.92164	GR-356_Ctrl_10D_peak_2946
chr5	82389061	82389291	231	82389219	14.00	9.55231	5.67752	5.86844	GR-356_Ctrl_10D_peak_2947
chr5	82406249	82406650	402	82406466	30.00	20.84636	7.97159	16.68005	GR-356_Ctrl_10D_peak_2948
chr5	84372130	84372595	466	84372327	47.00	38.96087	11.76831	34.33590	GR-356_Ctrl_10D_peak_2949
chr5	84688659	84688889	231	84688778	20.00	9.48921	4.55431	5.80980	GR-356_Ctrl_10D_peak_2950
chr5	87113804	87114123	320	87113981	20.00	9.48921	4.55431	5.80980	GR-356_Ctrl_10D_peak_2951
chr5	87151548	87151866	319	87151744	15.00	8.74009	5.00139	5.10498	GR-356_Ctrl_10D_peak_2952
chr5	91311654	91312041	388	91311897	20.00	9.48921	4.55431	5.80980	GR-356_Ctrl_10D_peak_2953
chr5	92552179	92552466	288	92552317	26.00	21.27150	9.29146	17.08906	GR-356_Ctrl_10D_peak_2954
chr5	94218378	94218709	332	94218524	33.00	22.53740	8.04665	18.31600	GR-356_Ctrl_10D_peak_2955
chr5	94901670	94901898	229	94901743	16.00	10.08143	5.56920	6.36625	GR-356_Ctrl_10D_peak_2956
chr5	95591656	95591935	280	95591810	17.00	9.68928	5.15416	5.99608	GR-356_Ctrl_10D_peak_2957
chr5	95617066	95617274	209	95617206	15.00	8.83037	5.05272	5.18296	GR-356_Ctrl_10D_peak_2958
chr5	95646670	95647054	385	95646806	45.00	37.77456	11.82880	33.17066	GR-356_Ctrl_10D_peak_2959
chr5	95712320	95712777	458	95712596	34.00	22.01969	7.59052	17.81164	GR-356_Ctrl_10D_peak_2960
chr5	96080583	96080810	228	96080741	19.00	12.56442	6.31590	8.71315	GR-356_Ctrl_10D_peak_2961
chr5	96227085	96227321	237	96227172	23.00	12.14256	5.31141	8.31681	GR-356_Ctrl_10D_peak_2962
chr5	96259189	96259642	454	96259403	105.00	119.61597	25.98834	113.81246	GR-356_Ctrl_10D_peak_2963
chr5	96329922	96330242	321	96330082	21.00	17.15361	8.42047	13.11785	GR-356_Ctrl_10D_peak_2964
chr5	96338620	96338893	274	96338743	22.00	19.29463	9.38235	15.18328	GR-356_Ctrl_10D_peak_2965
chr5	96572950	96573230	281	96573067	22.00	14.32561	6.58588	10.40539	GR-356_Ctrl_10D_peak_2966
chr5	98309869	98310108	240	98309929	19.00	9.21757	4.57460	5.55355	GR-356_Ctrl_10D_peak_2967
chr5	98428669	98429154	486	98428878	64.00	78.36687	25.01907	73.08175	GR-356_Ctrl_10D_peak_2968
chr5	103423839	103424041	203	103423932	11.00	7.27170	4.86604	3.75222	GR-356_Ctrl_10D_peak_2969
chr5	103461217	103461513	297	103461353	26.00	17.18885	7.13241	13.15129	GR-356_Ctrl_10D_peak_2970
chr5	103472801	103473192	392	103473000	14.00	10.10226	6.01108	6.38697	GR-356_Ctrl_10D_peak_2971
chr5	107381310	107381836	527	107381651	26.00	14.48959	5.85554	10.56558	GR-356_Ctrl_10D_peak_2972
chr5	107542473	107542814	342	107542648	38.00	30.99038	10.71744	26.53405	GR-356_Ctrl_10D_peak_2973
chr5	107555300	107555761	462	107555626	37.00	28.43243	9.77162	24.03705	GR-356_Ctrl_10D_peak_2974
chr5	109656765	109657297	533	109657079	64.00	69.61065	20.31816	64.45104	GR-356_Ctrl_10D_peak_2975
chr5	109743791	109744217	427	109743993	27.00	20.82214	8.75244	16.65837	GR-356_Ctrl_10D_peak_2976
chr5	110087030	110087260	231	110087149	16.00	15.08545	8.57603	11.12855	GR-356_Ctrl_10D_peak_2977
chr5	111742698	111742955	258	111742802	26.00	14.48959	5.85554	10.56558	GR-356_Ctrl_10D_peak_2978
chr5	111748265	111748627	363	111748440	56.00	46.36322	12.36170	41.58686	GR-356_Ctrl_10D_peak_2979
chr5	111829771	111830055	285	111829916	34.00	19.55227	6.56264	15.43071	GR-356_Ctrl_10D_peak_2980
chr5	111953485	111953780	296	111953633	26.00	14.48959	5.85554	10.56558	GR-356_Ctrl_10D_peak_2981
chr5	111997752	111998094	343	111997896	26.00	18.37072	7.73124	14.29157	GR-356_Ctrl_10D_peak_2982
chr5	113520515	113520859	345	113520690	16.00	7.89826	4.37151	4.32601	GR-356_Ctrl_10D_peak_2983
chr5	115455242	115455661	420	115455479	41.00	29.25748	9.10862	24.84976	GR-356_Ctrl_10D_peak_2984
chr5	115558634	115558980	347	115558799	46.00	52.22661	19.05865	47.35060	GR-356_Ctrl_10D_peak_2985
chr5	120388236	120388731	496	120388431	49.00	48.30667	15.62935	43.49782	GR-356_Ctrl_10D_peak_2986
chr5	120454202	120454669	468	120454353	22.00	19.58374	9.55376	15.46207	GR-356_Ctrl_10D_peak_2987
chr5	122120934	122121256	323	122121106	22.00	13.01516	5.91440	9.14773	GR-356_Ctrl_10D_peak_2988
chr5	122183166	122183861	696	122183593	33.00	24.02299	8.74303	19.75615	GR-356_Ctrl_10D_peak_2989
chr5	122258376	122258595	220	122258497	19.00	14.20561	7.24825	10.28829	GR-356_Ctrl_10D_peak_2990
chr5	123951635	123951937	303	123951756	33.00	23.82138	8.64668	19.56027	GR-356_Ctrl_10D_peak_2991
chr5	124000511	124000744	234	124000656	18.00	14.01580	7.39675	10.10307	GR-356_Ctrl_10D_peak_2992
chr5	124274998	124275316	319	124275193	34.00	29.17595	11.05283	24.77007	GR-356_Ctrl_10D_peak_2993
chr5	124343504	124343791	288	124343677	22.00	11.08498	4.98806	7.31317	GR-356_Ctrl_10D_peak_2994
chr5	124527876	124528106	231	124528026	14.00	10.30761	6.13646	6.57570	GR-356_Ctrl_10D_peak_2995
chr5	124824838	124825211	374	124825021	36.00	30.42965	11.05892	25.98978	GR-356_Ctrl_10D_peak_2996
chr5	125484360	125484579	220	125484493	19.00	8.72066	4.33744	5.08718	GR-356_Ctrl_10D_peak_2997
chr5	125485105	125485497	393	125485303	49.00	34.48594	9.37520	29.95384	GR-356_Ctrl_10D_peak_2998
chr5	126354355	126354646	292	126354508	31.00	19.09414	6.93990	14.98627	GR-356_Ctrl_10D_peak_2999
chr5	126385097	126385310	214	126385235	23.00	12.52541	5.48952	8.68205	GR-356_Ctrl_10D_peak_3000
chr5	126472147	126472421	275	126472251	21.00	14.56176	6.94749	10.62918	GR-356_Ctrl_10D_peak_3001
chr5	126508986	126509301	316	126509157	39.00	35.39782	12.63181	30.83960	GR-356_Ctrl_10D_peak_3002
chr5	126536932	126537154	223	126537058	20.00	15.28427	7.61066	11.32375	GR-356_Ctrl_10D_peak_3003
chr5	126640530	126640799	270	126640661	19.00	14.20561	7.24825	10.28829	GR-356_Ctrl_10D_peak_3004
chr5	126970541	126970745	205	126970595	18.00	7.97287	4.12057	4.39107	GR-356_Ctrl_10D_peak_3005
chr5	128579208	128579418	211	128579286	19.00	12.98741	6.55200	9.12393	GR-356_Ctrl_10D_peak_3006
chr5	130333264	130333466	203	130333319	17.00	10.54790	5.62657	6.80508	GR-356_Ctrl_10D_peak_3007
chr5	131303590	131303799	210	131303682	27.00	15.38130	6.07242	11.41640	GR-356_Ctrl_10D_peak_3008
chr5	131538099	131538334	236	131538232	12.00	8.12324	5.20960	4.53804	GR-356_Ctrl_10D_peak_3009
chr5	132090084	132090383	300	132090198	15.00	9.80885	5.61946	6.09950	GR-356_Ctrl_10D_peak_3010
chr5	132094723	132095024	302	132094880	22.00	13.01516	5.91440	9.14773	GR-356_Ctrl_10D_peak_3011
chr5	132136983	132137371	389	132137176	26.00	11.14530	4.45881	7.37053	GR-356_Ctrl_10D_peak_3012
chr5	132215228	132215632	405	132215445	31.00	19.09414	6.93990	14.98627	GR-356_Ctrl_10D_peak_3013
chr5	132363323	132363843	521	132363540	92.00	117.04829	31.06359	111.27432	GR-356_Ctrl_10D_peak_3014
chr5	132389778	132390003	226	132389888	17.00	12.73252	6.88948	8.87421	GR-356_Ctrl_10D_peak_3015
chr5	134438426	134438636	211	134438454	13.00	7.99729	4.94247	4.41457	GR-356_Ctrl_10D_peak_3016
chr5	134439195	134439423	229	134439313	17.00	8.69704	4.62866	5.06540	GR-356_Ctrl_10D_peak_3017
chr5	134466270	134466843	574	134466551	123.00	150.50999	31.53496	144.37869	GR-356_Ctrl_10D_peak_3018
chr5	134503223	134503510	288	134503309	16.00	9.72846	5.36852	6.02673	GR-356_Ctrl_10D_peak_3019
chr5	134509484	134509726	243	134509620	18.00	13.73705	7.23165	9.83573	GR-356_Ctrl_10D_peak_3020
chr5	135208551	135208911	361	135208724	44.00	39.28886	12.88541	34.64716	GR-356_Ctrl_10D_peak_3021
chr5	135650404	135650627	224	135650425	13.00	7.11342	4.42113	3.60941	GR-356_Ctrl_10D_peak_3022
chr5	135651208	135651520	313	135651367	33.00	24.02299	8.74303	19.75615	GR-356_Ctrl_10D_peak_3023
chr5	135999354	135999817	464	135999550	37.00	34.88075	13.07687	30.33986	GR-356_Ctrl_10D_peak_3024
chr5	136006495	136007717	1223	136006947	40.00	36.99666	13.11662	32.40778	GR-356_Ctrl_10D_peak_3025
chr5	136017074	136017322	249	136017171	26.00	14.48959	5.85554	10.56558	GR-356_Ctrl_10D_peak_3026
chr5	136020481	136020790	310	136020652	18.00	11.34183	5.85861	7.55715	GR-356_Ctrl_10D_peak_3027
chr5	136053714	136053962	249	136053808	24.00	6.72156	3.04061	3.24721	GR-356_Ctrl_10D_peak_3028
chr5	136058395	136058745	351	136058554	26.00	19.71597	8.43985	15.59237	GR-356_Ctrl_10D_peak_3029
chr5	137316050	137316275	226	137316187	12.00	7.39438	4.76197	3.85767	GR-356_Ctrl_10D_peak_3030
chr5	137564507	137564890	384	137564690	38.00	29.56363	10.02877	25.14299	GR-356_Ctrl_10D_peak_3031
chr5	137565494	137565959	466	137565737	55.00	56.97228	17.68453	52.01768	GR-356_Ctrl_10D_peak_3032
chr5	139482343	139482718	376	139482554	25.00	17.95786	7.77113	13.89315	GR-356_Ctrl_10D_peak_3033
chr5	140220760	140221082	323	140220915	42.00	46.80863	17.75326	42.02546	GR-356_Ctrl_10D_peak_3034
chr5	140246698	140246904	207	140246790	19.00	12.44848	6.25174	8.60573	GR-356_Ctrl_10D_peak_3035
chr5	142201512	142201719	208	142201674	18.00	9.51884	4.88581	5.83557	GR-356_Ctrl_10D_peak_3036
chr5	142216035	142216324	290	142216133	17.00	6.11501	3.37507	2.70472	GR-356_Ctrl_10D_peak_3037
chr5	142356864	142357209	346	142357080	24.00	18.23935	8.19001	14.16380	GR-356_Ctrl_10D_peak_3038
chr5	142472323	142472595	273	142472482	19.00	14.90097	7.65498	10.94791	GR-356_Ctrl_10D_peak_3039
chr5	142515081	142515375	295	142515250	20.00	16.95276	8.59104	12.92164	GR-356_Ctrl_10D_peak_3040
chr5	142827095	142827489	395	142827246	17.00	8.59832	4.57765	4.98136	GR-356_Ctrl_10D_peak_3041
chr5	143245919	143246364	446	143246080	24.00	16.91158	7.47224	12.88545	GR-356_Ctrl_10D_peak_3042
chr5	144004249	144004609	361	144004432	27.00	25.44601	11.35409	21.13571	GR-356_Ctrl_10D_peak_3043
chr5	144189835	144190483	649	144190228	53.00	46.30318	13.23935	41.52857	GR-356_Ctrl_10D_peak_3044
chr5	145479259	145479765	507	145479551	46.00	48.62969	17.03339	43.81374	GR-356_Ctrl_10D_peak_3045
chr5	145946466	145946833	368	145946710	15.00	11.25988	6.48805	7.47609	GR-356_Ctrl_10D_peak_3046
chr5	145975089	145975333	245	145975181	27.00	13.46549	5.25011	9.58075	GR-356_Ctrl_10D_peak_3047
chr5	146751065	146751338	274	146751258	19.00	12.56442	6.31590	8.71315	GR-356_Ctrl_10D_peak_3048
chr5	147535617	147535819	203	147535699	11.00	7.22567	4.83728	3.71380	GR-356_Ctrl_10D_peak_3049
chr5	148913133	148913373	241	148913230	20.00	11.22712	5.40011	7.44680	GR-356_Ctrl_10D_peak_3050
chr5	148965553	148966170	618	148965989	36.00	21.40624	6.93765	17.21871	GR-356_Ctrl_10D_peak_3051
chr5	148966333	148966719	387	148966526	32.00	27.30678	10.70795	22.94378	GR-356_Ctrl_10D_peak_3052
chr5	148973062	148973274	213	148973160	18.00	9.41373	4.83197	5.73691	GR-356_Ctrl_10D_peak_3053
chr5	148976830	148977400	571	148977236	30.00	26.03306	10.66797	21.70448	GR-356_Ctrl_10D_peak_3054
chr5	148978506	148978723	218	148978595	15.00	9.61549	5.50605	5.92870	GR-356_Ctrl_10D_peak_3055
chr5	148978948	148979326	379	148979126	49.00	48.30667	15.62935	43.49782	GR-356_Ctrl_10D_peak_3056
chr5	149002218	149002460	243	149002356	25.00	10.41423	4.29367	6.67642	GR-356_Ctrl_10D_peak_3057
chr5	149134255	149134878	624	149134561	72.00	79.62496	21.81895	74.32444	GR-356_Ctrl_10D_peak_3058
chr5	149135359	149135907	549	149135616	163.00	248.40321	56.43702	241.50314	GR-356_Ctrl_10D_peak_3059
chr5	149172391	149172609	219	149172478	17.00	9.68928	5.15416	5.99608	GR-356_Ctrl_10D_peak_3060
chr5	149489869	149490104	236	149490036	15.00	8.83037	5.05272	5.18296	GR-356_Ctrl_10D_peak_3061
chr5	149601059	149601298	240	149601133	14.00	9.71139	5.77363	6.01637	GR-356_Ctrl_10D_peak_3062
chr5	149605932	149606230	299	149606058	22.00	15.58957	7.26329	11.61718	GR-356_Ctrl_10D_peak_3063
chr5	149632500	149632717	218	149632625	12.00	8.12324	5.20960	4.53804	GR-356_Ctrl_10D_peak_3064
chr5	149857489	149857917	429	149857724	50.00	54.42758	18.48304	49.51251	GR-356_Ctrl_10D_peak_3065
chr5	149895937	149896382	446	149896191	62.00	49.02963	11.81275	44.20578	GR-356_Ctrl_10D_peak_3066
chr5	149915770	149915990	221	149915857	16.00	11.44280	6.36389	7.65220	GR-356_Ctrl_10D_peak_3067
chr5	149939025	149939344	320	149939127	32.00	25.70735	9.86336	21.38255	GR-356_Ctrl_10D_peak_3068
chr5	150316736	150317581	846	150317422	41.00	23.73126	6.93593	19.47187	GR-356_Ctrl_10D_peak_3069
chr5	150469706	150470204	499	150469878	22.00	15.45432	7.18950	11.48781	GR-356_Ctrl_10D_peak_3070
chr5	150497673	150497877	205	150497747	21.00	14.56176	6.94749	10.62918	GR-356_Ctrl_10D_peak_3071
chr5	150515480	150515713	234	150515557	17.00	10.65101	5.68431	6.89792	GR-356_Ctrl_10D_peak_3072
chr5	150517493	150517770	278	150517577	14.00	8.26455	4.91400	4.66776	GR-356_Ctrl_10D_peak_3073
chr5	150637542	150637847	306	150637720	23.00	16.63569	7.57908	12.62046	GR-356_Ctrl_10D_peak_3074
chr5	150780170	150780613	444	150780403	46.00	47.67117	16.50715	42.87261	GR-356_Ctrl_10D_peak_3075
chr5	151093504	151093795	292	151093693	29.00	15.13619	5.62512	11.17838	GR-356_Ctrl_10D_peak_3076
chr5	151745256	151745607	352	151745427	16.00	7.89826	4.37151	4.32601	GR-356_Ctrl_10D_peak_3077
chr5	152688600	152688848	249	152688699	18.00	7.97287	4.12057	4.39107	GR-356_Ctrl_10D_peak_3078
chr5	153222810	153223237	428	153223057	29.00	29.36590	12.93402	24.95514	GR-356_Ctrl_10D_peak_3079
chr5	153629696	153629920	225	153629801	14.00	7.95815	4.73693	4.37816	GR-356_Ctrl_10D_peak_3080
chr5	153900870	153901368	499	153901085	38.00	29.56363	10.02877	25.14299	GR-356_Ctrl_10D_peak_3081
chr5	154198221	154198431	211	154198297	15.00	9.16004	5.24160	5.50222	GR-356_Ctrl_10D_peak_3082
chr5	154267550	154267923	374	154267722	29.00	24.82092	10.32385	20.52627	GR-356_Ctrl_10D_peak_3083
chr5	154368200	154368424	225	154368289	25.00	15.19263	6.37450	11.23444	GR-356_Ctrl_10D_peak_3084
chr5	155532699	155533240	542	155533063	34.00	27.18439	10.02198	22.82345	GR-356_Ctrl_10D_peak_3085
chr5	157385133	157385352	220	157385269	16.00	11.09999	6.16101	7.32616	GR-356_Ctrl_10D_peak_3086
chr5	157603363	157603740	378	157603605	35.00	35.33422	14.09533	30.78458	GR-356_Ctrl_10D_peak_3087
chr5	158702339	158702541	203	158702524	12.00	6.29799	4.10534	2.87237	GR-356_Ctrl_10D_peak_3088
chr5	159207766	159208075	310	159207880	20.00	12.41014	6.01319	8.57445	GR-356_Ctrl_10D_peak_3089
chr5	159582081	159582283	203	159582216	20.00	9.37569	4.50143	5.69965	GR-356_Ctrl_10D_peak_3090
chr5	159778964	159779257	294	159779077	31.00	22.35464	8.45323	18.13638	GR-356_Ctrl_10D_peak_3091
chr5	159820039	159820540	502	159820264	67.00	86.15369	27.81862	80.76309	GR-356_Ctrl_10D_peak_3092
chr5	159849625	159849900	276	159849713	24.00	18.23935	8.19001	14.16380	GR-356_Ctrl_10D_peak_3093
chr5	159905379	159905844	466	159905623	56.00	38.64957	9.41305	34.03072	GR-356_Ctrl_10D_peak_3094
chr5	159912354	159912842	489	159912556	68.00	67.67997	17.74321	62.54818	GR-356_Ctrl_10D_peak_3095
chr5	159913138	159913340	203	159913249	19.00	14.82841	7.61226	10.88220	GR-356_Ctrl_10D_peak_3096
chr5	159936753	159937057	305	159936895	27.00	20.98960	8.84227	16.81438	GR-356_Ctrl_10D_peak_3097
chr5	163760604	163760855	252	163760668	17.00	10.65101	5.68431	6.89792	GR-356_Ctrl_10D_peak_3098
chr5	164191212	164191468	257	164191331	17.00	8.69704	4.62866	5.06540	GR-356_Ctrl_10D_peak_3099
chr5	166772794	166773114	321	166772968	18.00	14.53192	7.70456	10.60465	GR-356_Ctrl_10D_peak_3100
chr5	167699468	167699781	314	167699608	27.00	19.42272	8.01759	15.30470	GR-356_Ctrl_10D_peak_3101
chr5	167759476	167759838	363	167759641	23.00	20.12570	9.56155	15.98056	GR-356_Ctrl_10D_peak_3102
chr5	167814936	167815181	246	167815013	17.00	6.11501	3.37507	2.70472	GR-356_Ctrl_10D_peak_3103
chr5	168312872	168313208	337	168313050	24.00	14.87636	6.42870	10.92602	GR-356_Ctrl_10D_peak_3104
chr5	168314813	168315241	429	168315084	29.00	13.42967	4.95424	9.54682	GR-356_Ctrl_10D_peak_3105
chr5	168317669	168318101	433	168317919	30.00	25.74438	10.50892	21.41930	GR-356_Ctrl_10D_peak_3106
chr5	168404506	168404873	368	168404675	62.00	67.06905	19.89510	61.94301	GR-356_Ctrl_10D_peak_3107
chr5	168411131	168411467	337	168411316	23.00	16.63569	7.57908	12.62046	GR-356_Ctrl_10D_peak_3108
chr5	168651133	168651377	245	168651203	15.00	9.16004	5.24160	5.50222	GR-356_Ctrl_10D_peak_3109
chr5	169161150	169161383	234	169161291	20.00	9.68772	4.64748	5.99510	GR-356_Ctrl_10D_peak_3110
chr5	169350698	169351066	369	169350878	33.00	26.03601	9.73564	21.70693	GR-356_Ctrl_10D_peak_3111
chr5	169351681	169351883	203	169351771	19.00	11.48192	5.72685	7.69008	GR-356_Ctrl_10D_peak_3112
chr5	169576021	169576461	441	169576271	34.00	25.10741	9.00018	20.80608	GR-356_Ctrl_10D_peak_3113
chr5	169695904	169696455	552	169696195	58.00	56.40432	16.21356	51.46156	GR-356_Ctrl_10D_peak_3114
chr5	169971007	169971403	397	169971130	22.00	11.08498	4.98806	7.31317	GR-356_Ctrl_10D_peak_3115
chr5	169976905	169977349	445	169977218	18.00	12.21146	6.34633	8.38231	GR-356_Ctrl_10D_peak_3116
chr5	170151289	170151572	284	170151431	14.00	8.68811	5.16192	5.06073	GR-356_Ctrl_10D_peak_3117
chr5	170597128	170597368	241	170597323	16.00	6.54374	3.68682	3.07554	GR-356_Ctrl_10D_peak_3118
chr5	170614808	170615112	305	170614950	18.00	9.51884	4.88581	5.83557	GR-356_Ctrl_10D_peak_3119
chr5	171521485	171521776	292	171521634	29.00	17.20947	6.50616	13.17059	GR-356_Ctrl_10D_peak_3120
chr5	171596591	171596826	236	171596701	16.00	9.21498	5.08113	5.55103	GR-356_Ctrl_10D_peak_3121
chr5	171985043	171985317	275	171985196	25.00	13.61351	5.63867	9.71280	GR-356_Ctrl_10D_peak_3122
chr5	172412867	172413186	320	172413034	25.00	20.96173	9.42273	16.79241	GR-356_Ctrl_10D_peak_3123
chr5	172533770	172534120	351	172533853	17.00	7.24685	3.90370	3.73324	GR-356_Ctrl_10D_peak_3124
chr5	172772305	172772704	400	172772545	51.00	51.04650	16.25453	46.19081	GR-356_Ctrl_10D_peak_3125
chr5	172775727	172775944	218	172775817	22.00	15.58957	7.26329	11.61718	GR-356_Ctrl_10D_peak_3126
chr5	172789906	172790261	356	172790082	27.00	13.46549	5.25011	9.58075	GR-356_Ctrl_10D_peak_3127
chr5	172800026	172800247	222	172800181	21.00	15.03150	7.20720	11.07672	GR-356_Ctrl_10D_peak_3128
chr5	172801338	172801550	213	172801423	16.00	6.54374	3.68682	3.07554	GR-356_Ctrl_10D_peak_3129
chr5	172858902	172859207	306	172859178	16.00	8.82704	4.86782	5.18296	GR-356_Ctrl_10D_peak_3130
chr5	172868506	172869532	1027	172869290	139.00	177.87395	36.00071	171.53967	GR-356_Ctrl_10D_peak_3131
chr5	172901120	172901469	350	172901339	30.00	24.41639	9.78965	20.12776	GR-356_Ctrl_10D_peak_3132
chr5	172904650	172904937	288	172904788	11.00	7.13513	4.78077	3.62655	GR-356_Ctrl_10D_peak_3133
chr5	173455245	173455748	504	173455506	45.00	39.47590	12.64108	34.83237	GR-356_Ctrl_10D_peak_3134
chr5	173456763	173457287	525	173457025	30.00	20.84636	7.97159	16.68005	GR-356_Ctrl_10D_peak_3135
chr5	173472184	173472595	412	173472424	44.00	35.40800	11.03279	30.84962	GR-356_Ctrl_10D_peak_3136
chr5	173764421	173764785	365	173764602	21.00	12.11161	5.65725	8.28673	GR-356_Ctrl_10D_peak_3137
chr5	173766357	173766860	504	173766612	58.00	66.41828	21.38234	61.30522	GR-356_Ctrl_10D_peak_3138
chr5	173789067	173789393	327	173789241	20.00	11.22712	5.40011	7.44680	GR-356_Ctrl_10D_peak_3139
chr5	173953708	173953913	206	173953763	12.00	8.75946	5.60474	5.12077	GR-356_Ctrl_10D_peak_3140
chr5	173963142	173963394	253	173963249	21.00	16.38297	7.97308	12.37675	GR-356_Ctrl_10D_peak_3141
chr5	174737531	174737775	245	174737651	15.00	11.35453	6.54556	7.56438	GR-356_Ctrl_10D_peak_3142
chr5	175788470	175788723	254	175788624	11.00	8.31799	5.52268	4.70885	GR-356_Ctrl_10D_peak_3143
chr5	175809922	175810305	384	175810146	31.00	23.77722	9.16296	19.51720	GR-356_Ctrl_10D_peak_3144
chr5	176330375	176330614	240	176330438	12.00	10.06080	6.41579	6.34686	GR-356_Ctrl_10D_peak_3145
chr5	178642373	178642915	543	178642719	65.00	52.55925	12.37527	47.67547	GR-356_Ctrl_10D_peak_3146
chr5	179265621	179265853	233	179265763	16.00	7.89826	4.37151	4.32601	GR-356_Ctrl_10D_peak_3147
chr5	179378869	179379325	457	179379192	16.00	11.68258	6.50673	7.87434	GR-356_Ctrl_10D_peak_3148
chr6	422629	422837	209	422732	11.00	9.76027	6.42095	6.05470	GR-356_Ctrl_10D_peak_3149
chr6	706208	706420	213	706291	16.00	12.42749	6.95465	8.58616	GR-356_Ctrl_10D_peak_3150
chr6	1481249	1481689	441	1481515	25.00	23.05716	10.63653	18.81376	GR-356_Ctrl_10D_peak_3151
chr6	2432309	2432559	251	2432491	10.00	7.30453	5.06246	3.78107	GR-356_Ctrl_10D_peak_3152
chr6	3826080	3826557	478	3826239	20.00	16.95276	8.59104	12.92164	GR-356_Ctrl_10D_peak_3153
chr6	3911983	3912241	259	3912085	21.00	19.46520	9.79449	15.34683	GR-356_Ctrl_10D_peak_3154
chr6	3913453	3913929	477	3913710	57.00	74.85558	26.69296	69.61784	GR-356_Ctrl_10D_peak_3155
chr6	4322948	4323163	216	4323001	11.00	8.75433	5.79645	5.11872	GR-356_Ctrl_10D_peak_3156
chr6	4599911	4600260	350	4600105	44.00	32.51730	9.75924	28.02608	GR-356_Ctrl_10D_peak_3157
chr6	4603332	4603650	319	4603367	14.00	7.95815	4.73693	4.37816	GR-356_Ctrl_10D_peak_3158
chr6	5112456	5112767	312	5112593	17.00	12.11236	6.52343	8.28673	GR-356_Ctrl_10D_peak_3159
chr6	5125446	5125788	343	5125594	24.00	23.94887	11.50558	19.68544	GR-356_Ctrl_10D_peak_3160
chr6	6320985	6321233	249	6321110	13.00	9.28838	5.72736	5.61672	GR-356_Ctrl_10D_peak_3161
chr6	8108231	8108592	362	8108476	22.00	13.01516	5.91440	9.14773	GR-356_Ctrl_10D_peak_3162
chr6	10347994	10348196	203	10348124	14.00	8.68811	5.16192	5.06073	GR-356_Ctrl_10D_peak_3163
chr6	10760076	10760390	315	10760192	10.00	7.70143	5.31341	4.14847	GR-356_Ctrl_10D_peak_3164
chr6	11207203	11207468	266	11207367	22.00	9.56208	4.31259	5.87762	GR-356_Ctrl_10D_peak_3165
chr6	11365091	11365352	262	11365224	14.00	7.95815	4.73693	4.37816	GR-356_Ctrl_10D_peak_3166
chr6	11428889	11429402	514	11429232	26.00	26.65816	12.42603	22.31889	GR-356_Ctrl_10D_peak_3167
chr6	11589267	11589516	250	11589380	15.00	11.86155	6.85482	8.05101	GR-356_Ctrl_10D_peak_3168
chr6	11609268	11610024	757	11609536	40.00	28.19092	8.89175	23.80577	GR-356_Ctrl_10D_peak_3169
chr6	11614462	11614776	315	11614617	27.00	15.38130	6.07242	11.41640	GR-356_Ctrl_10D_peak_3170
chr6	11650673	11651078	406	11650860	43.00	40.56979	13.89499	35.90549	GR-356_Ctrl_10D_peak_3171
chr6	11653109	11653398	290	11653247	21.00	18.55828	9.25105	14.47690	GR-356_Ctrl_10D_peak_3172
chr6	12483858	12484089	232	12483978	12.00	9.84152	6.27949	6.13172	GR-356_Ctrl_10D_peak_3173
chr6	14001724	14001926	203	14001803	11.00	8.88742	5.87973	5.23882	GR-356_Ctrl_10D_peak_3174
chr6	14499851	14500101	251	14499968	27.00	20.98960	8.84227	16.81438	GR-356_Ctrl_10D_peak_3175
chr6	14733029	14733392	364	14733197	24.00	12.75363	5.42180	8.89377	GR-356_Ctrl_10D_peak_3176
chr6	14743845	14744264	420	14744068	25.00	18.78006	8.21068	14.68246	GR-356_Ctrl_10D_peak_3177
chr6	15062515	15062846	332	15062703	13.00	9.28838	5.72736	5.61672	GR-356_Ctrl_10D_peak_3178
chr6	15429681	15429958	278	15429852	9.00	7.51202	5.35079	3.96361	GR-356_Ctrl_10D_peak_3179
chr6	16277494	16278075	582	16277803	17.00	10.65101	5.68431	6.89792	GR-356_Ctrl_10D_peak_3180
chr6	16683801	16684040	240	16683917	15.00	11.65406	6.72804	7.84895	GR-356_Ctrl_10D_peak_3181
chr6	16910079	16910380	302	16910215	25.00	21.88306	9.95147	17.68093	GR-356_Ctrl_10D_peak_3182
chr6	18260807	18261023	217	18260957	12.00	6.29799	4.10534	2.87237	GR-356_Ctrl_10D_peak_3183
chr6	20056396	20056640	245	20056508	20.00	21.35004	11.23666	17.16300	GR-356_Ctrl_10D_peak_3184
chr6	21754901	21755252	352	21755055	31.00	21.89208	8.22873	17.68758	GR-356_Ctrl_10D_peak_3185
chr6	22236724	22237069	346	22236845	29.00	24.82092	10.32385	20.52627	GR-356_Ctrl_10D_peak_3186
chr6	22249011	22249238	228	22249185	13.00	5.65348	3.60007	2.27384	GR-356_Ctrl_10D_peak_3187
chr6	22251437	22251737	301	22251605	38.00	26.08930	8.45801	21.75888	GR-356_Ctrl_10D_peak_3188
chr6	22320860	22321062	203	22320967	9.00	5.87397	4.31134	2.47776	GR-356_Ctrl_10D_peak_3189
chr6	25006392	25006798	407	25006596	51.00	59.89110	21.08616	54.88375	GR-356_Ctrl_10D_peak_3190
chr6	25175297	25175499	203	25175378	13.00	9.28838	5.72736	5.61672	GR-356_Ctrl_10D_peak_3191
chr6	25193292	25193551	260	25193479	18.00	13.80571	7.27223	9.90112	GR-356_Ctrl_10D_peak_3192
chr6	25884079	25884341	263	25884270	10.00	7.88452	5.42875	4.31631	GR-356_Ctrl_10D_peak_3193
chr6	26295930	26296466	537	26296117	34.00	28.96334	10.94055	24.56211	GR-356_Ctrl_10D_peak_3194
chr6	26296804	26297222	419	26297047	27.00	24.34837	10.71697	20.06435	GR-356_Ctrl_10D_peak_3195
chr6	26309749	26310005	257	26309868	14.00	10.91324	6.50814	7.15050	GR-356_Ctrl_10D_peak_3196
chr6	30769416	30769881	466	30769711	21.00	15.03150	7.20720	11.07672	GR-356_Ctrl_10D_peak_3197
chr6	30844169	30844450	282	30844310	15.00	11.35453	6.54556	7.56438	GR-356_Ctrl_10D_peak_3198
chr6	30926770	30927091	322	30926908	37.00	33.71969	12.44881	29.20105	GR-356_Ctrl_10D_peak_3199
chr6	31401575	31401777	203	31401690	17.00	9.68928	5.15416	5.99608	GR-356_Ctrl_10D_peak_3200
chr6	33590557	33590765	209	33590673	14.00	10.30761	6.13646	6.57570	GR-356_Ctrl_10D_peak_3201
chr6	33746079	33746533	455	33746331	61.00	71.03877	22.46958	65.85938	GR-356_Ctrl_10D_peak_3202
chr6	34244247	34244487	241	34244356	12.00	8.22331	5.27154	4.62849	GR-356_Ctrl_10D_peak_3203
chr6	34681051	34681265	215	34681098	18.00	6.76303	3.56258	3.28705	GR-356_Ctrl_10D_peak_3204
chr6	35601610	35602419	810	35602080	157.00	218.67989	45.24210	211.97479	GR-356_Ctrl_10D_peak_3205
chr6	35606227	35606473	247	35606334	25.00	16.75008	7.14496	12.73366	GR-356_Ctrl_10D_peak_3206
chr6	35725748	35726038	291	35725819	12.00	9.70068	6.19179	6.00573	GR-356_Ctrl_10D_peak_3207
chr6	35727928	35728350	423	35728148	84.00	121.72723	38.34286	115.90448	GR-356_Ctrl_10D_peak_3208
chr6	35731789	35732246	458	35732051	48.00	57.44603	21.12556	52.48443	GR-356_Ctrl_10D_peak_3209
chr6	36679289	36679795	507	36679601	45.00	57.65902	22.70203	52.69387	GR-356_Ctrl_10D_peak_3210
chr6	37531124	37531634	511	37531498	21.00	10.27760	4.77118	6.55237	GR-356_Ctrl_10D_peak_3211
chr6	38310145	38310500	356	38310343	10.00	8.61749	5.88587	4.99608	GR-356_Ctrl_10D_peak_3212
chr6	40906830	40907109	280	40906944	20.00	17.72624	9.05381	13.66821	GR-356_Ctrl_10D_peak_3213
chr6	40962193	40962426	234	40962253	16.00	11.09999	6.16101	7.32616	GR-356_Ctrl_10D_peak_3214
chr6	42045707	42046049	343	42045853	37.00	20.11122	6.27537	15.96726	GR-356_Ctrl_10D_peak_3215
chr6	42226824	42227094	271	42226950	12.00	9.63177	6.14885	5.94279	GR-356_Ctrl_10D_peak_3216
chr6	42403911	42404115	205	42404009	13.00	8.21603	5.07378	4.62604	GR-356_Ctrl_10D_peak_3217
chr6	42569170	42569393	224	42569279	9.00	5.78997	4.25752	2.40549	GR-356_Ctrl_10D_peak_3218
chr6	44010774	44011133	360	44010976	17.00	13.52504	7.36375	9.63421	GR-356_Ctrl_10D_peak_3219
chr6	44012083	44012385	303	44012249	20.00	14.61480	7.22669	10.67925	GR-356_Ctrl_10D_peak_3220
chr6	44058553	44059035	483	44058844	62.00	67.06905	19.89510	61.94301	GR-356_Ctrl_10D_peak_3221
chr6	44373844	44374113	270	44373966	17.00	13.52504	7.36375	9.63421	GR-356_Ctrl_10D_peak_3222
chr6	44452839	44453052	214	44452920	19.00	10.36255	5.14296	6.62581	GR-356_Ctrl_10D_peak_3223
chr6	44966844	44967083	240	44966953	14.00	10.21939	6.08255	6.49609	GR-356_Ctrl_10D_peak_3224
chr6	45075327	45075540	214	45075450	14.00	10.21939	6.08255	6.49609	GR-356_Ctrl_10D_peak_3225
chr6	45116728	45116950	223	45116817	11.00	8.95550	5.92227	5.30388	GR-356_Ctrl_10D_peak_3226
chr6	45437201	45437459	259	45437398	12.00	4.96098	3.34292	1.67862	GR-356_Ctrl_10D_peak_3227
chr6	45609148	45609374	227	45609263	13.00	10.58728	6.53126	6.84165	GR-356_Ctrl_10D_peak_3228
chr6	45650578	45650958	381	45650833	28.00	25.60407	11.09972	21.28617	GR-356_Ctrl_10D_peak_3229
chr6	45655823	45656161	339	45656073	24.00	17.69942	7.89488	13.64293	GR-356_Ctrl_10D_peak_3230
chr6	45697683	45698067	385	45697878	28.00	24.56963	10.50996	20.27740	GR-356_Ctrl_10D_peak_3231
chr6	45710425	45710751	327	45710585	25.00	23.05716	10.63653	18.81376	GR-356_Ctrl_10D_peak_3232
chr6	48827357	48827559	203	48827502	16.00	6.54374	3.68682	3.07554	GR-356_Ctrl_10D_peak_3233
chr6	52543350	52543714	365	52543498	20.00	11.22712	5.40011	7.44680	GR-356_Ctrl_10D_peak_3234
chr6	52566808	52567246	439	52567004	35.00	36.20811	14.59811	31.63820	GR-356_Ctrl_10D_peak_3235
chr6	52603535	52603906	372	52603655	22.00	13.01516	5.91440	9.14773	GR-356_Ctrl_10D_peak_3236
chr6	53168478	53168793	316	53168609	14.00	7.95815	4.73693	4.37816	GR-356_Ctrl_10D_peak_3237
chr6	53623651	53624007	357	53623821	19.00	15.78879	8.18195	11.80509	GR-356_Ctrl_10D_peak_3238
chr6	53628883	53629089	207	53629019	14.00	12.36472	7.40284	8.52987	GR-356_Ctrl_10D_peak_3239
chr6	54054197	54054427	231	54054287	23.00	20.41550	9.73208	16.26382	GR-356_Ctrl_10D_peak_3240
chr6	55918915	55919117	203	55918986	10.00	5.59859	3.98654	2.22578	GR-356_Ctrl_10D_peak_3241
chr6	56370707	56370909	203	56370790	12.00	8.75946	5.60474	5.12077	GR-356_Ctrl_10D_peak_3242
chr6	64520091	64520372	282	64520194	15.00	11.93237	6.89814	8.11718	GR-356_Ctrl_10D_peak_3243
chr6	71248447	71248757	311	71248599	14.00	10.30761	6.13646	6.57570	GR-356_Ctrl_10D_peak_3244
chr6	71478837	71479585	749	71479460	26.00	16.80506	6.94299	12.78369	GR-356_Ctrl_10D_peak_3245
chr6	73704003	73704629	627	73704298	41.00	44.79081	17.03113	40.04410	GR-356_Ctrl_10D_peak_3246
chr6	73704857	73705093	237	73704973	19.00	12.56442	6.31590	8.71315	GR-356_Ctrl_10D_peak_3247
chr6	73722775	73723002	228	73722869	15.00	11.35453	6.54556	7.56438	GR-356_Ctrl_10D_peak_3248
chr6	73774484	73774780	297	73774591	26.00	19.87698	8.52647	15.74164	GR-356_Ctrl_10D_peak_3249
chr6	77292816	77293201	386	77293002	22.00	13.01516	5.91440	9.14773	GR-356_Ctrl_10D_peak_3250
chr6	80454333	80454535	203	80454393	12.00	8.29870	5.31827	4.69290	GR-356_Ctrl_10D_peak_3251
chr6	80541050	80541511	462	80541313	25.00	25.29535	11.96581	20.99092	GR-356_Ctrl_10D_peak_3252
chr6	82818857	82819087	231	82819022	15.00	13.55932	7.89636	9.66147	GR-356_Ctrl_10D_peak_3253
chr6	84522227	84522592	366	84522398	30.00	24.41639	9.78965	20.12776	GR-356_Ctrl_10D_peak_3254
chr6	88360223	88360428	206	88360349	21.00	12.87280	6.04573	9.01196	GR-356_Ctrl_10D_peak_3255
chr6	88365341	88365624	284	88365479	26.00	23.10785	10.33422	18.86118	GR-356_Ctrl_10D_peak_3256
chr6	88367964	88368531	568	88368217	32.00	32.27741	13.50021	27.79223	GR-356_Ctrl_10D_peak_3257
chr6	88490993	88491195	203	88491054	13.00	12.07600	7.44822	8.25623	GR-356_Ctrl_10D_peak_3258
chr6	89035578	89035861	284	89035710	17.00	17.26211	9.63142	13.22009	GR-356_Ctrl_10D_peak_3259
chr6	89952881	89953101	221	89953012	12.00	9.63177	6.14885	5.94279	GR-356_Ctrl_10D_peak_3260
chr6	90368910	90369286	377	90369138	38.00	40.45003	15.81462	35.79047	GR-356_Ctrl_10D_peak_3261
chr6	99932848	99933410	563	99933050	15.00	14.46185	8.44637	10.53909	GR-356_Ctrl_10D_peak_3262
chr6	105596270	105596734	465	105596630	15.00	5.86474	3.46995	2.47256	GR-356_Ctrl_10D_peak_3263
chr6	105601616	105601886	271	105601692	11.00	7.34068	4.90917	3.80450	GR-356_Ctrl_10D_peak_3264
chr6	106739413	106739788	376	106739607	41.00	26.23752	7.87517	21.90370	GR-356_Ctrl_10D_peak_3265
chr6	106746081	106746448	368	106746255	22.00	15.45432	7.18950	11.48781	GR-356_Ctrl_10D_peak_3266
chr6	106870936	106871210	275	106871070	16.00	13.04442	7.32928	9.17460	GR-356_Ctrl_10D_peak_3267
chr6	108587696	108587931	236	108587790	15.00	11.86155	6.85482	8.05101	GR-356_Ctrl_10D_peak_3268
chr6	108593081	108593283	203	108593203	14.00	9.65783	5.74123	5.96542	GR-356_Ctrl_10D_peak_3269
chr6	108620987	108621276	290	108621146	16.00	12.32642	6.89355	8.49305	GR-356_Ctrl_10D_peak_3270
chr6	108653907	108654458	552	108654230	43.00	48.01141	18.00028	43.20510	GR-356_Ctrl_10D_peak_3271
chr6	108661463	108661667	205	108661581	12.00	10.44978	6.65661	6.70917	GR-356_Ctrl_10D_peak_3272
chr6	108689273	108689526	254	108689335	12.00	8.29870	5.31827	4.69290	GR-356_Ctrl_10D_peak_3273
chr6	109241205	109241472	268	109241276	10.00	6.41677	4.50007	2.96268	GR-356_Ctrl_10D_peak_3274
chr6	110529493	110529834	342	110529659	15.00	11.35453	6.54556	7.56438	GR-356_Ctrl_10D_peak_3275
chr6	110817884	110818096	213	110817956	14.00	10.84639	6.46701	7.08551	GR-356_Ctrl_10D_peak_3276
chr6	111657207	111657495	289	111657355	19.00	15.78879	8.18195	11.80509	GR-356_Ctrl_10D_peak_3277
chr6	112097528	112097745	218	112097603	12.00	8.29870	5.31827	4.69290	GR-356_Ctrl_10D_peak_3278
chr6	112218789	112219039	251	112218946	12.00	8.75946	5.60474	5.12077	GR-356_Ctrl_10D_peak_3279
chr6	113120629	113121124	496	113120776	18.00	11.59671	6.00011	7.79238	GR-356_Ctrl_10D_peak_3280
chr6	113122209	113122423	215	113122312	15.00	10.65720	6.12398	6.90103	GR-356_Ctrl_10D_peak_3281
chr6	113450241	113450544	304	113450372	31.00	30.91800	13.09111	26.46207	GR-356_Ctrl_10D_peak_3282
chr6	113833606	113833847	242	113833732	11.00	8.31799	5.52268	4.70885	GR-356_Ctrl_10D_peak_3283
chr6	117167864	117168271	408	117168043	17.00	10.65101	5.68431	6.89792	GR-356_Ctrl_10D_peak_3284
chr6	117440821	117441545	725	117441357	39.00	43.65458	17.24536	38.93047	GR-356_Ctrl_10D_peak_3285
chr6	117448765	117449050	286	117448930	17.00	8.69704	4.62866	5.06540	GR-356_Ctrl_10D_peak_3286
chr6	118388297	118388699	403	118388499	30.00	20.84636	7.97159	16.68005	GR-356_Ctrl_10D_peak_3287
chr6	119602506	119602857	352	119602693	29.00	28.23959	12.27292	23.85041	GR-356_Ctrl_10D_peak_3288
chr6	121691137	121691495	359	121691299	15.00	11.93237	6.89814	8.11718	GR-356_Ctrl_10D_peak_3289
chr6	124676082	124676508	427	124676296	83.00	88.53497	21.36239	83.11283	GR-356_Ctrl_10D_peak_3290
chr6	124743045	124743300	256	124743120	15.00	8.83037	5.05272	5.18296	GR-356_Ctrl_10D_peak_3291
chr6	127484601	127484812	212	127484774	11.00	8.68926	5.75569	5.06153	GR-356_Ctrl_10D_peak_3292
chr6	129491057	129491313	257	129491209	26.00	19.02040	8.07002	14.91440	GR-356_Ctrl_10D_peak_3293
chr6	129501456	129501732	277	129501542	19.00	12.56442	6.31590	8.71315	GR-356_Ctrl_10D_peak_3294
chr6	129684041	129684398	358	129684235	40.00	36.67540	12.94760	32.08898	GR-356_Ctrl_10D_peak_3295
chr6	129889691	129889962	272	129889833	19.00	15.78879	8.18195	11.80509	GR-356_Ctrl_10D_peak_3296
chr6	130602433	130602652	220	130602571	15.00	5.86474	3.46995	2.47256	GR-356_Ctrl_10D_peak_3297
chr6	132063786	132064037	252	132063882	16.00	9.63178	5.31398	5.94279	GR-356_Ctrl_10D_peak_3298
chr6	133609564	133610229	666	133609850	55.00	45.16447	12.14483	40.41102	GR-356_Ctrl_10D_peak_3299
chr6	134175843	134176189	347	134176039	16.00	13.51786	7.61819	9.63232	GR-356_Ctrl_10D_peak_3300
chr6	134422764	134423073	310	134422898	16.00	9.72846	5.36852	6.02673	GR-356_Ctrl_10D_peak_3301
chr6	134826979	134827258	280	134827075	23.00	20.41550	9.73208	16.26382	GR-356_Ctrl_10D_peak_3302
chr6	134853149	134853766	618	134853519	66.00	72.99152	21.15828	67.78094	GR-356_Ctrl_10D_peak_3303
chr6	134908209	134908432	224	134908334	14.00	12.36472	7.40284	8.52987	GR-356_Ctrl_10D_peak_3304
chr6	134909033	134909445	413	134909231	18.00	15.34104	8.19154	11.37763	GR-356_Ctrl_10D_peak_3305
chr6	137261356	137261693	338	137261533	15.00	14.14617	8.25471	10.23260	GR-356_Ctrl_10D_peak_3306
chr6	137811450	137811808	359	137811648	30.00	32.26159	14.26693	27.77966	GR-356_Ctrl_10D_peak_3307
chr6	137873229	137873855	627	137873619	29.00	28.23959	12.27292	23.85041	GR-356_Ctrl_10D_peak_3308
chr6	138971171	138971484	314	138971345	20.00	11.22712	5.40011	7.44680	GR-356_Ctrl_10D_peak_3309
chr6	139587569	139587841	273	139587724	16.00	12.42749	6.95465	8.58616	GR-356_Ctrl_10D_peak_3310
chr6	139743601	139743896	296	139743739	22.00	19.34005	9.40924	15.22368	GR-356_Ctrl_10D_peak_3311
chr6	140043456	140043722	267	140043611	14.00	13.00946	7.79778	9.14563	GR-356_Ctrl_10D_peak_3312
chr6	140051491	140051778	288	140051641	26.00	23.10785	10.33422	18.86118	GR-356_Ctrl_10D_peak_3313
chr6	140062078	140062378	301	140062231	22.00	13.33605	6.07576	9.46117	GR-356_Ctrl_10D_peak_3314
chr6	140857680	140858380	701	140857934	56.00	68.12180	23.31855	62.98133	GR-356_Ctrl_10D_peak_3315
chr6	141421405	141421667	263	141421516	12.00	10.36947	6.60701	6.63240	GR-356_Ctrl_10D_peak_3316
chr6	141483571	141483874	304	141483758	21.00	8.83310	4.12509	5.18506	GR-356_Ctrl_10D_peak_3317
chr6	142298317	142298543	227	142298446	13.00	9.20658	5.67704	5.54393	GR-356_Ctrl_10D_peak_3318
chr6	142375261	142375581	321	142375436	21.00	12.11161	5.65725	8.28673	GR-356_Ctrl_10D_peak_3319
chr6	142551616	142551820	205	142551715	16.00	13.04442	7.32928	9.17460	GR-356_Ctrl_10D_peak_3320
chr6	142871912	142872278	367	142872024	14.00	9.65783	5.74123	5.96542	GR-356_Ctrl_10D_peak_3321
chr6	144798264	144798721	458	144798504	38.00	34.99907	12.77641	30.45558	GR-356_Ctrl_10D_peak_3322
chr6	147156950	147157282	333	147157128	20.00	20.95532	11.00073	16.78824	GR-356_Ctrl_10D_peak_3323
chr6	147162047	147162340	294	147162183	22.00	23.43898	11.86615	19.18264	GR-356_Ctrl_10D_peak_3324
chr6	147170416	147170639	224	147170521	16.00	11.68258	6.50673	7.87434	GR-356_Ctrl_10D_peak_3325
chr6	148867982	148868243	262	148868042	13.00	9.28838	5.72736	5.61672	GR-356_Ctrl_10D_peak_3326
chr6	149080247	149080942	696	149080762	40.00	36.67540	12.94760	32.08898	GR-356_Ctrl_10D_peak_3327
chr6	151036099	151036644	546	151036415	78.00	107.63319	33.84565	101.97832	GR-356_Ctrl_10D_peak_3328
chr6	151040868	151041618	751	151041417	28.00	22.11738	9.15806	17.90403	GR-356_Ctrl_10D_peak_3329
chr6	151045928	151046179	252	151046058	21.00	17.15361	8.42047	13.11785	GR-356_Ctrl_10D_peak_3330
chr6	151060135	151060406	272	151060214	17.00	15.04171	8.28402	11.08517	GR-356_Ctrl_10D_peak_3331
chr6	151067728	151068650	923	151068282	34.00	17.51286	5.77994	13.46382	GR-356_Ctrl_10D_peak_3332
chr6	151068903	151069303	401	151069051	13.00	8.68610	5.35848	5.06032	GR-356_Ctrl_10D_peak_3333
chr6	154653917	154654236	320	154654063	15.00	14.14617	8.25471	10.23260	GR-356_Ctrl_10D_peak_3334
chr6	155026446	155026859	414	155026599	27.00	25.61799	11.45473	21.29588	GR-356_Ctrl_10D_peak_3335
chr6	155103231	155103515	285	155103341	33.00	26.03601	9.73564	21.70693	GR-356_Ctrl_10D_peak_3336
chr6	155171221	155171476	256	155171316	12.00	9.36569	5.98290	5.68975	GR-356_Ctrl_10D_peak_3337
chr6	156827611	156827854	244	156827743	13.00	11.61892	7.16865	7.81423	GR-356_Ctrl_10D_peak_3338
chr6	157148893	157149158	266	157149035	14.00	7.17713	4.29514	3.66668	GR-356_Ctrl_10D_peak_3339
chr6	157514979	157515276	298	157515161	13.00	12.14649	7.49111	8.31795	GR-356_Ctrl_10D_peak_3340
chr6	158040324	158040741	418	158040563	28.00	26.92145	11.86382	22.56609	GR-356_Ctrl_10D_peak_3341
chr6	158706512	158706779	268	158706637	22.00	15.58957	7.26329	11.61718	GR-356_Ctrl_10D_peak_3342
chr6	158707090	158707500	411	158707325	57.00	62.93890	19.95944	57.88088	GR-356_Ctrl_10D_peak_3343
chr6	158720470	158720944	475	158720731	24.00	26.77673	13.19746	22.42820	GR-356_Ctrl_10D_peak_3344
chr6	159900585	159900787	203	159900638	16.00	9.72846	5.36852	6.02673	GR-356_Ctrl_10D_peak_3345
chr6	160391337	160391633	297	160391443	15.00	11.35453	6.54556	7.56438	GR-356_Ctrl_10D_peak_3346
chr6	161406657	161406930	274	161406776	23.00	17.86373	8.25908	13.80007	GR-356_Ctrl_10D_peak_3347
chr6	161407604	161407935	332	161407736	23.00	18.63708	8.69790	14.54769	GR-356_Ctrl_10D_peak_3348
chr6	163311743	163312033	291	163311908	18.00	14.64586	7.77285	10.70526	GR-356_Ctrl_10D_peak_3349
chr6	163457916	163458181	266	163458062	22.00	20.95804	10.37513	16.79072	GR-356_Ctrl_10D_peak_3350
chr6	163533570	163533781	212	163533675	22.00	13.01516	5.91440	9.14773	GR-356_Ctrl_10D_peak_3351
chr6	163746039	163746332	294	163746175	12.00	10.06080	6.41579	6.34686	GR-356_Ctrl_10D_peak_3352
chr6	163790444	163790663	220	163790560	18.00	14.64586	7.77285	10.70526	GR-356_Ctrl_10D_peak_3353
chr6	164322547	164322850	304	164322720	24.00	21.80094	10.22743	17.60134	GR-356_Ctrl_10D_peak_3354
chr6	166557001	166557288	288	166557115	24.00	21.80094	10.22743	17.60134	GR-356_Ctrl_10D_peak_3355
chr6	166567114	166567522	409	166567350	17.00	10.54790	5.62657	6.80508	GR-356_Ctrl_10D_peak_3356
chr6	168007553	168008030	478	168007734	19.00	15.78879	8.18195	11.80509	GR-356_Ctrl_10D_peak_3357
chr6	169073350	169073685	336	169073444	15.00	11.35453	6.54556	7.56438	GR-356_Ctrl_10D_peak_3358
chr6	169168013	169168233	221	169168146	10.00	6.41677	4.50007	2.96268	GR-356_Ctrl_10D_peak_3359
chr6	169172339	169172819	481	169172599	47.00	51.81746	18.37194	46.94699	GR-356_Ctrl_10D_peak_3360
chr6	169173877	169174170	294	169174029	16.00	13.85411	7.82380	9.94685	GR-356_Ctrl_10D_peak_3361
chr6	169288570	169288885	316	169288698	12.00	8.22331	5.27154	4.62849	GR-356_Ctrl_10D_peak_3362
chr6	169292456	169293006	551	169292558	19.00	15.66840	8.11006	11.69225	GR-356_Ctrl_10D_peak_3363
chr7	101818	102077	260	101922	25.00	20.11907	8.94733	15.97394	GR-356_Ctrl_10D_peak_3364
chr7	2309851	2310468	618	2310254	42.00	39.26162	13.57919	34.62147	GR-356_Ctrl_10D_peak_3365
chr7	3194797	3195054	258	3194956	19.00	6.38878	3.30283	2.94758	GR-356_Ctrl_10D_peak_3366
chr7	3239288	3239519	232	3239410	16.00	15.94465	9.09634	11.95197	GR-356_Ctrl_10D_peak_3367
chr7	3436765	3437039	275	3436938	17.00	13.52504	7.36375	9.63421	GR-356_Ctrl_10D_peak_3368
chr7	5591573	5591781	209	5591693	17.00	8.69704	4.62866	5.06540	GR-356_Ctrl_10D_peak_3369
chr7	6290390	6290592	203	6290439	11.00	9.23878	6.09878	5.57418	GR-356_Ctrl_10D_peak_3370
chr7	6317820	6318341	522	6318143	53.00	54.15467	17.05294	49.24373	GR-356_Ctrl_10D_peak_3371
chr7	6881686	6881907	222	6881771	15.00	12.45324	7.21748	8.61014	GR-356_Ctrl_10D_peak_3372
chr7	7911474	7911803	330	7911660	12.00	8.22331	5.27154	4.62849	GR-356_Ctrl_10D_peak_3373
chr7	12715767	12716137	371	12715949	44.00	36.57191	11.57166	31.99191	GR-356_Ctrl_10D_peak_3374
chr7	16269031	16269250	220	16269148	18.00	11.99634	6.22440	8.17827	GR-356_Ctrl_10D_peak_3375
chr7	16915490	16915795	306	16915624	16.00	14.78004	8.38988	10.83391	GR-356_Ctrl_10D_peak_3376
chr7	17600293	17600501	209	17600354	12.00	8.29870	5.31827	4.69290	GR-356_Ctrl_10D_peak_3377
chr7	17677358	17677721	364	17677543	44.00	41.88770	14.21078	37.19566	GR-356_Ctrl_10D_peak_3378
chr7	17679341	17679594	254	17679513	19.00	15.78879	8.18195	11.80509	GR-356_Ctrl_10D_peak_3379
chr7	17679972	17680492	521	17680218	31.00	33.69799	14.72715	29.18031	GR-356_Ctrl_10D_peak_3380
chr7	18978224	18978505	282	18978329	10.00	4.76356	3.47375	1.50489	GR-356_Ctrl_10D_peak_3381
chr7	19560465	19560917	453	19560649	59.00	75.25983	25.86803	70.01762	GR-356_Ctrl_10D_peak_3382
chr7	21366380	21366583	204	21366471	12.00	10.93743	6.95603	7.17142	GR-356_Ctrl_10D_peak_3383
chr7	23334573	23334926	354	23334803	17.00	7.24685	3.90370	3.73324	GR-356_Ctrl_10D_peak_3384
chr7	23357437	23357639	203	23357491	16.00	12.42749	6.95465	8.58616	GR-356_Ctrl_10D_peak_3385
chr7	23430845	23431194	350	23431018	26.00	19.87698	8.52647	15.74164	GR-356_Ctrl_10D_peak_3386
chr7	23713772	23714220	449	23714020	29.00	28.23959	12.27292	23.85041	GR-356_Ctrl_10D_peak_3387
chr7	24701647	24701869	223	24701742	17.00	15.04171	8.28402	11.08517	GR-356_Ctrl_10D_peak_3388
chr7	24742054	24742256	203	24742209	13.00	7.11342	4.42113	3.60941	GR-356_Ctrl_10D_peak_3389
chr7	28037346	28037580	235	28037478	17.00	12.11236	6.52343	8.28673	GR-356_Ctrl_10D_peak_3390
chr7	28570959	28571230	272	28571099	22.00	19.20033	9.32657	15.08950	GR-356_Ctrl_10D_peak_3391
chr7	29285445	29285671	227	29285549	15.00	8.83037	5.05272	5.18296	GR-356_Ctrl_10D_peak_3392
chr7	30169346	30169548	203	30169473	13.00	9.78813	6.03587	6.07882	GR-356_Ctrl_10D_peak_3393
chr7	30318641	30318843	203	30318733	12.00	6.29799	4.10534	2.87237	GR-356_Ctrl_10D_peak_3394
chr7	32093748	32093951	204	32093835	14.00	7.95815	4.73693	4.37816	GR-356_Ctrl_10D_peak_3395
chr7	32115837	32116186	350	32116003	20.00	16.01727	8.03773	12.02110	GR-356_Ctrl_10D_peak_3396
chr7	32155626	32156073	448	32155885	50.00	62.88968	23.31409	57.83252	GR-356_Ctrl_10D_peak_3397
chr7	32161771	32162023	253	32161930	24.00	16.91158	7.47224	12.88545	GR-356_Ctrl_10D_peak_3398
chr7	33974671	33974887	217	33974785	16.00	13.04442	7.32928	9.17460	GR-356_Ctrl_10D_peak_3399
chr7	33979968	33980249	282	33980066	17.00	10.65101	5.68431	6.89792	GR-356_Ctrl_10D_peak_3400
chr7	39589833	39590078	246	39589907	15.00	10.65720	6.12398	6.90103	GR-356_Ctrl_10D_peak_3401
chr7	40221817	40222250	434	40222043	58.00	61.25594	18.63192	56.22491	GR-356_Ctrl_10D_peak_3402
chr7	40437509	40437912	404	40437711	27.00	25.61799	11.45473	21.29588	GR-356_Ctrl_10D_peak_3403
chr7	41027370	41027703	334	41027571	23.00	21.45270	10.34721	17.26322	GR-356_Ctrl_10D_peak_3404
chr7	41029050	41029382	333	41029288	12.00	8.29870	5.31827	4.69290	GR-356_Ctrl_10D_peak_3405
chr7	41108011	41108479	469	41108249	33.00	27.96687	10.73704	23.59138	GR-356_Ctrl_10D_peak_3406
chr7	41224539	41224822	284	41224664	15.00	11.35453	6.54556	7.56438	GR-356_Ctrl_10D_peak_3407
chr7	41573926	41574128	203	41574023	12.00	9.63177	6.14885	5.94279	GR-356_Ctrl_10D_peak_3408
chr7	41580014	41580480	467	41580120	24.00	17.55129	7.81468	13.50081	GR-356_Ctrl_10D_peak_3409
chr7	41916573	41916978	406	41916739	21.00	18.00353	8.92107	13.93598	GR-356_Ctrl_10D_peak_3410
chr7	42661404	42661607	204	42661457	13.00	11.53201	7.11524	7.73803	GR-356_Ctrl_10D_peak_3411
chr7	42973079	42973313	235	42973177	17.00	8.69704	4.62866	5.06540	GR-356_Ctrl_10D_peak_3412
chr7	43164824	43165026	203	43164880	14.00	6.37500	3.85722	2.93436	GR-356_Ctrl_10D_peak_3413
chr7	43535750	43536236	487	43536007	33.00	27.96687	10.73704	23.59138	GR-356_Ctrl_10D_peak_3414
chr7	44184417	44184735	319	44184570	17.00	15.04171	8.28402	11.08517	GR-356_Ctrl_10D_peak_3415
chr7	44693848	44694187	340	44693987	34.00	36.35715	15.08969	31.78510	GR-356_Ctrl_10D_peak_3416
chr7	45236847	45237104	258	45236904	17.00	14.18108	7.76041	10.26550	GR-356_Ctrl_10D_peak_3417
chr7	45435852	45436059	208	45436028	10.00	7.88452	5.42875	4.31631	GR-356_Ctrl_10D_peak_3418
chr7	45889411	45889743	333	45889556	17.00	16.57467	9.21684	12.56478	GR-356_Ctrl_10D_peak_3419
chr7	46145368	46145689	322	46145504	21.00	12.11161	5.65725	8.28673	GR-356_Ctrl_10D_peak_3420
chr7	46160839	46161175	337	46161017	28.00	26.92145	11.86382	22.56609	GR-356_Ctrl_10D_peak_3421
chr7	46258167	46258369	203	46258186	9.00	6.63238	4.79641	3.16078	GR-356_Ctrl_10D_peak_3422
chr7	46291823	46292025	203	46291883	13.00	9.78813	6.03587	6.07882	GR-356_Ctrl_10D_peak_3423
chr7	46908809	46909049	241	46908997	16.00	9.72846	5.36852	6.02673	GR-356_Ctrl_10D_peak_3424
chr7	47254318	47254662	345	47254479	11.00	7.34068	4.90917	3.80450	GR-356_Ctrl_10D_peak_3425
chr7	47458174	47458386	213	47458336	17.00	10.65101	5.68431	6.89792	GR-356_Ctrl_10D_peak_3426
chr7	47601446	47601698	253	47601619	15.00	8.83037	5.05272	5.18296	GR-356_Ctrl_10D_peak_3427
chr7	47651491	47651763	273	47651672	13.00	9.85016	6.07427	6.14016	GR-356_Ctrl_10D_peak_3428
chr7	47757893	47758256	364	47758058	55.00	59.97929	19.27118	54.97089	GR-356_Ctrl_10D_peak_3429
chr7	47763286	47763584	299	47763471	13.00	9.28838	5.72736	5.61672	GR-356_Ctrl_10D_peak_3430
chr7	47786603	47786993	391	47786758	17.00	8.69704	4.62866	5.06540	GR-356_Ctrl_10D_peak_3431
chr7	50342764	50343037	274	50342857	16.00	15.94465	9.09634	11.95197	GR-356_Ctrl_10D_peak_3432
chr7	50502242	50502692	451	50502458	74.00	114.34487	40.13092	108.60900	GR-356_Ctrl_10D_peak_3433
chr7	50664615	50664893	279	50664753	14.00	6.37500	3.85722	2.93436	GR-356_Ctrl_10D_peak_3434
chr7	51045720	51045978	259	51045871	18.00	11.59671	6.00011	7.79238	GR-356_Ctrl_10D_peak_3435
chr7	51102899	51103153	255	51103036	16.00	14.68131	8.32961	10.73764	GR-356_Ctrl_10D_peak_3436
chr7	54967505	54967771	267	54967664	25.00	15.83259	6.68585	11.84545	GR-356_Ctrl_10D_peak_3437
chr7	55132704	55133135	432	55132946	23.00	11.91056	5.20493	8.09781	GR-356_Ctrl_10D_peak_3438
chr7	55570955	55571176	222	55571052	13.00	9.20658	5.67704	5.54393	GR-356_Ctrl_10D_peak_3439
chr7	65794778	65795027	250	65794882	18.00	17.87550	9.72889	13.81173	GR-356_Ctrl_10D_peak_3440
chr7	66148440	66148796	357	66148634	27.00	29.10724	13.52505	24.70541	GR-356_Ctrl_10D_peak_3441
chr7	73203669	73204156	488	73203824	25.00	24.02659	11.20948	19.75829	GR-356_Ctrl_10D_peak_3442
chr7	73266884	73267349	466	73267073	45.00	55.05368	21.17028	50.13304	GR-356_Ctrl_10D_peak_3443
chr7	73715661	73715982	322	73715789	14.00	7.95815	4.73693	4.37816	GR-356_Ctrl_10D_peak_3444
chr7	73718036	73718379	344	73718254	18.00	11.59671	6.00011	7.79238	GR-356_Ctrl_10D_peak_3445
chr7	73851525	73851898	374	73851699	13.00	10.88371	6.71497	7.12116	GR-356_Ctrl_10D_peak_3446
chr7	73894869	73895480	612	73895059	23.00	16.63569	7.57908	12.62046	GR-356_Ctrl_10D_peak_3447
chr7	73941812	73942159	348	73941994	20.00	11.22712	5.40011	7.44680	GR-356_Ctrl_10D_peak_3448
chr7	74023026	74023474	449	74023200	47.00	45.89777	15.15817	41.12805	GR-356_Ctrl_10D_peak_3449
chr7	74098085	74098634	550	74098188	12.00	4.96098	3.34292	1.67862	GR-356_Ctrl_10D_peak_3450
chr7	74478046	74478480	435	74478282	27.00	25.61799	11.45473	21.29588	GR-356_Ctrl_10D_peak_3451
chr7	74757053	74757499	447	74757217	23.00	20.56168	9.81834	16.40304	GR-356_Ctrl_10D_peak_3452
chr7	74820358	74820715	358	74820535	57.00	52.88226	14.91458	47.99069	GR-356_Ctrl_10D_peak_3453
chr7	75125207	75125631	425	75125430	49.00	56.79936	20.27516	51.85056	GR-356_Ctrl_10D_peak_3454
chr7	75188640	75188997	358	75188817	23.00	22.61936	11.04536	18.39483	GR-356_Ctrl_10D_peak_3455
chr7	75565215	75565583	369	75565394	20.00	18.73982	9.66469	14.64792	GR-356_Ctrl_10D_peak_3456
chr7	75732599	75733275	677	75732861	47.00	48.45967	16.51815	43.64832	GR-356_Ctrl_10D_peak_3457
chr7	76294283	76294588	306	76294431	24.00	20.67458	9.56872	16.51237	GR-356_Ctrl_10D_peak_3458
chr7	76467951	76468271	321	76468124	12.00	6.29799	4.10534	2.87237	GR-356_Ctrl_10D_peak_3459
chr7	77327044	77327300	257	77327119	14.00	12.19309	7.29724	8.36400	GR-356_Ctrl_10D_peak_3460
chr7	77409427	77409649	223	77409495	19.00	12.56442	6.31590	8.71315	GR-356_Ctrl_10D_peak_3461
chr7	77834669	77834929	261	77834801	20.00	21.24224	11.17233	17.06107	GR-356_Ctrl_10D_peak_3462
chr7	80722824	80723175	352	80722981	33.00	18.64333	6.37514	14.55323	GR-356_Ctrl_10D_peak_3463
chr7	80781241	80781959	719	80781771	24.00	12.75363	5.42180	8.89377	GR-356_Ctrl_10D_peak_3464
chr7	80883360	80883912	553	80883641	58.00	55.08150	15.58563	50.16008	GR-356_Ctrl_10D_peak_3465
chr7	80942282	80942721	440	80942401	23.00	15.88221	7.17335	11.89270	GR-356_Ctrl_10D_peak_3466
chr7	84025349	84025722	374	84025501	21.00	12.11161	5.65725	8.28673	GR-356_Ctrl_10D_peak_3467
chr7	90178836	90179177	342	90178988	15.00	14.65187	8.56126	10.70843	GR-356_Ctrl_10D_peak_3468
chr7	90595128	90595432	305	90595260	20.00	19.41447	10.07246	15.29690	GR-356_Ctrl_10D_peak_3469
chr7	90816759	90817111	353	90816921	16.00	11.68258	6.50673	7.87434	GR-356_Ctrl_10D_peak_3470
chr7	92633389	92633825	437	92633654	17.00	14.68435	8.06632	10.74059	GR-356_Ctrl_10D_peak_3471
chr7	92641776	92642066	291	92641904	22.00	15.58957	7.26329	11.61718	GR-356_Ctrl_10D_peak_3472
chr7	92642339	92642596	258	92642418	17.00	13.52504	7.36375	9.63421	GR-356_Ctrl_10D_peak_3473
chr7	92791693	92791944	252	92791766	12.00	10.44978	6.65661	6.70917	GR-356_Ctrl_10D_peak_3474
chr7	94301173	94301469	297	94301281	20.00	7.01318	3.46797	3.52074	GR-356_Ctrl_10D_peak_3475
chr7	94620798	94621119	322	94620983	16.00	15.29721	8.70479	11.33642	GR-356_Ctrl_10D_peak_3476
chr7	95500648	95500949	302	95500820	27.00	24.34837	10.71697	20.06435	GR-356_Ctrl_10D_peak_3477
chr7	95501418	95501823	406	95501665	39.00	35.39782	12.63181	30.83960	GR-356_Ctrl_10D_peak_3478
chr7	95550196	95550438	243	95550325	11.00	7.34068	4.90917	3.80450	GR-356_Ctrl_10D_peak_3479
chr7	95608910	95609212	303	95609080	20.00	21.35004	11.23666	17.16300	GR-356_Ctrl_10D_peak_3480
chr7	100503391	100503712	322	100503537	14.00	7.95815	4.73693	4.37816	GR-356_Ctrl_10D_peak_3481
chr7	100545744	100546175	432	100546053	21.00	8.83310	4.12509	5.18506	GR-356_Ctrl_10D_peak_3482
chr7	101100030	101100638	609	101100389	86.00	85.36012	18.86786	79.97859	GR-356_Ctrl_10D_peak_3483
chr7	101112172	101112657	486	101112412	96.00	140.41251	41.55732	134.39398	GR-356_Ctrl_10D_peak_3484
chr7	101117407	101117750	344	101117568	27.00	20.98960	8.84227	16.81438	GR-356_Ctrl_10D_peak_3485
chr7	101118215	101118686	472	101118406	44.00	32.51730	9.75924	28.02608	GR-356_Ctrl_10D_peak_3486
chr7	101122033	101122250	218	101122099	22.00	13.01516	5.91440	9.14773	GR-356_Ctrl_10D_peak_3487
chr7	101126643	101126907	265	101126782	11.00	7.27170	4.86604	3.75222	GR-356_Ctrl_10D_peak_3488
chr7	101402000	101402316	317	101402180	11.00	9.76027	6.42095	6.05470	GR-356_Ctrl_10D_peak_3489
chr7	101882691	101883185	495	101882877	23.00	19.48305	9.18597	15.36237	GR-356_Ctrl_10D_peak_3490
chr7	102063688	102064152	465	102064020	16.00	12.32642	6.89355	8.49305	GR-356_Ctrl_10D_peak_3491
chr7	102393601	102393831	231	102393708	16.00	11.09999	6.16101	7.32616	GR-356_Ctrl_10D_peak_3492
chr7	105776063	105776361	299	105776235	22.00	15.58957	7.26329	11.61718	GR-356_Ctrl_10D_peak_3493
chr7	106216542	106216773	232	106216660	14.00	9.65783	5.74123	5.96542	GR-356_Ctrl_10D_peak_3494
chr7	106217078	106217626	549	106217372	46.00	52.52131	19.22758	47.63863	GR-356_Ctrl_10D_peak_3495
chr7	107595329	107595613	285	107595445	20.00	11.22712	5.40011	7.44680	GR-356_Ctrl_10D_peak_3496
chr7	107995848	107996105	258	107995983	24.00	18.98293	8.60320	14.87765	GR-356_Ctrl_10D_peak_3497
chr7	111198304	111198649	346	111198487	36.00	27.31246	9.51447	22.94630	GR-356_Ctrl_10D_peak_3498
chr7	116177074	116177312	239	116177226	12.00	7.74386	4.97573	4.18694	GR-356_Ctrl_10D_peak_3499
chr7	116218166	116218536	371	116218432	15.00	10.11215	5.79860	6.39343	GR-356_Ctrl_10D_peak_3500
chr7	116271911	116272278	368	116272094	37.00	33.71969	12.44881	29.20105	GR-356_Ctrl_10D_peak_3501
chr7	116317261	116317651	391	116317451	43.00	40.29907	13.75383	35.64334	GR-356_Ctrl_10D_peak_3502
chr7	116433563	116433765	203	116433631	11.00	7.92169	5.27361	4.34910	GR-356_Ctrl_10D_peak_3503
chr7	116434838	116435338	501	116435027	53.00	47.71565	13.88599	42.91491	GR-356_Ctrl_10D_peak_3504
chr7	116522435	116522637	203	116522531	14.00	9.65783	5.74123	5.96542	GR-356_Ctrl_10D_peak_3505
chr7	116633582	116633904	323	116633736	27.00	27.60748	12.63059	23.23863	GR-356_Ctrl_10D_peak_3506
chr7	116706620	116706885	266	116706701	23.00	16.63569	7.57908	12.62046	GR-356_Ctrl_10D_peak_3507
chr7	116998744	116998973	230	116998886	10.00	8.61749	5.88587	4.99608	GR-356_Ctrl_10D_peak_3508
chr7	116999333	116999772	440	116999491	14.00	10.30761	6.13646	6.57570	GR-356_Ctrl_10D_peak_3509
chr7	117124621	117124823	203	117124667	12.00	8.22331	5.27154	4.62849	GR-356_Ctrl_10D_peak_3510
chr7	121530333	121530641	309	121530506	21.00	14.56176	6.94749	10.62918	GR-356_Ctrl_10D_peak_3511
chr7	121544642	121545213	572	121544919	28.00	22.11738	9.15806	17.90403	GR-356_Ctrl_10D_peak_3512
chr7	128217423	128217857	435	128217671	21.00	18.13681	9.00014	14.06386	GR-356_Ctrl_10D_peak_3513
chr7	130292774	130293047	274	130292908	19.00	10.36255	5.14296	6.62581	GR-356_Ctrl_10D_peak_3514
chr7	130913272	130913627	356	130913508	18.00	7.97287	4.12057	4.39107	GR-356_Ctrl_10D_peak_3515
chr7	131298311	131298549	239	131298435	14.00	10.30761	6.13646	6.57570	GR-356_Ctrl_10D_peak_3516
chr7	131633417	131633685	269	131633538	13.00	7.78829	4.81779	4.22574	GR-356_Ctrl_10D_peak_3517
chr7	135204402	135204665	264	135204518	14.00	10.84639	6.46701	7.08551	GR-356_Ctrl_10D_peak_3518
chr7	137667600	137667977	378	137667846	25.00	23.05716	10.63653	18.81376	GR-356_Ctrl_10D_peak_3519
chr7	137687964	137688241	278	137688103	31.00	21.70337	8.13805	17.50897	GR-356_Ctrl_10D_peak_3520
chr7	139732237	139732439	203	139732340	10.00	6.79972	4.74247	3.31966	GR-356_Ctrl_10D_peak_3521
chr7	139734449	139734805	357	139734637	35.00	30.39722	11.36863	25.95806	GR-356_Ctrl_10D_peak_3522
chr7	139916093	139916455	363	139916259	27.00	20.98960	8.84227	16.81438	GR-356_Ctrl_10D_peak_3523
chr7	140626375	140626635	261	140626463	25.00	22.89809	10.54308	18.66389	GR-356_Ctrl_10D_peak_3524
chr7	141456353	141456669	317	141456542	26.00	30.04870	14.44713	25.61727	GR-356_Ctrl_10D_peak_3525
chr7	142556748	142557086	339	142556918	47.00	45.89777	15.15817	41.12805	GR-356_Ctrl_10D_peak_3526
chr7	142612520	142612879	360	142612720	28.00	22.11738	9.15806	17.90403	GR-356_Ctrl_10D_peak_3527
chr7	143512667	143512880	214	143512742	15.00	11.35453	6.54556	7.56438	GR-356_Ctrl_10D_peak_3528
chr7	143633315	143633550	236	143633469	13.00	7.11342	4.42113	3.60941	GR-356_Ctrl_10D_peak_3529
chr7	143824093	143824393	301	143824261	14.00	11.33228	6.76639	7.54764	GR-356_Ctrl_10D_peak_3530
chr7	144205324	144205618	295	144205441	20.00	16.82593	8.51557	12.80157	GR-356_Ctrl_10D_peak_3531
chr7	144345225	144345668	444	144345488	23.00	23.26154	11.43100	19.00914	GR-356_Ctrl_10D_peak_3532
chr7	150312902	150313154	253	150313037	14.00	10.30761	6.13646	6.57570	GR-356_Ctrl_10D_peak_3533
chr7	151597984	151598493	510	151598144	33.00	33.43903	13.78711	28.93029	GR-356_Ctrl_10D_peak_3534
chr7	151687684	151687949	266	151687803	17.00	13.52504	7.36375	9.63421	GR-356_Ctrl_10D_peak_3535
chr7	151754162	151754457	296	151754304	11.00	7.34068	4.90917	3.80450	GR-356_Ctrl_10D_peak_3536
chr7	155919145	155919405	261	155919239	12.00	8.29870	5.31827	4.69290	GR-356_Ctrl_10D_peak_3537
chr7	156903518	156903959	442	156903715	82.00	119.35199	38.19854	113.54981	GR-356_Ctrl_10D_peak_3538
chr7	157302483	157302822	340	157302658	32.00	26.77034	10.42124	22.42191	GR-356_Ctrl_10D_peak_3539
chr7	157309032	157309296	265	157309196	15.00	8.83037	5.05272	5.18296	GR-356_Ctrl_10D_peak_3540
chr7	157405123	157405325	203	157405146	9.00	7.20549	5.15920	3.69400	GR-356_Ctrl_10D_peak_3541
chr7	158432038	158432281	244	158432134	11.00	9.76027	6.42095	6.05470	GR-356_Ctrl_10D_peak_3542
chr7	158818483	158818716	234	158818619	16.00	13.85411	7.82380	9.94685	GR-356_Ctrl_10D_peak_3543
chr7	158863926	158864133	208	158863980	11.00	9.70041	6.38419	6.00564	GR-356_Ctrl_10D_peak_3544
chr8	461589	461813	225	461706	12.00	8.29870	5.31827	4.69290	GR-356_Ctrl_10D_peak_3545
chr8	6313597	6313799	203	6313668	13.00	12.14649	7.49111	8.31795	GR-356_Ctrl_10D_peak_3546
chr8	6642578	6642912	335	6642727	24.00	20.67458	9.56872	16.51237	GR-356_Ctrl_10D_peak_3547
chr8	8288496	8288698	203	8288657	12.00	7.74386	4.97573	4.18694	GR-356_Ctrl_10D_peak_3548
chr8	8611502	8611773	272	8611621	15.00	7.12379	4.11437	3.61532	GR-356_Ctrl_10D_peak_3549
chr8	8625863	8626078	216	8626011	18.00	11.59671	6.00011	7.79238	GR-356_Ctrl_10D_peak_3550
chr8	8627572	8627780	209	8627671	19.00	10.36255	5.14296	6.62581	GR-356_Ctrl_10D_peak_3551
chr8	8664438	8665058	621	8664766	24.00	14.87636	6.42870	10.92602	GR-356_Ctrl_10D_peak_3552
chr8	9088754	9089017	264	9088916	15.00	11.35453	6.54556	7.56438	GR-356_Ctrl_10D_peak_3553
chr8	10631800	10632028	229	10631886	11.00	8.37771	5.56020	4.76612	GR-356_Ctrl_10D_peak_3554
chr8	11511026	11511228	203	11511081	9.00	5.91677	4.33876	2.51963	GR-356_Ctrl_10D_peak_3555
chr8	11515845	11516323	479	11516036	67.00	68.86650	18.68681	63.71648	GR-356_Ctrl_10D_peak_3556
chr8	13267242	13267484	243	13267353	14.00	10.84639	6.46701	7.08551	GR-356_Ctrl_10D_peak_3557
chr8	13357432	13357781	350	13357629	22.00	20.73238	10.23969	16.56986	GR-356_Ctrl_10D_peak_3558
chr8	16695988	16696226	239	16696102	16.00	15.74214	8.97427	11.76398	GR-356_Ctrl_10D_peak_3559
chr8	17466986	17467298	313	17467127	28.00	24.56963	10.50996	20.27740	GR-356_Ctrl_10D_peak_3560
chr8	18666296	18666679	384	18666495	16.00	15.19048	8.63993	11.23234	GR-356_Ctrl_10D_peak_3561
chr8	19087081	19087283	203	19087146	17.00	10.65101	5.68431	6.89792	GR-356_Ctrl_10D_peak_3562
chr8	19128121	19128617	497	19128457	73.00	85.28992	24.24241	79.91051	GR-356_Ctrl_10D_peak_3563
chr8	19134513	19134742	230	19134645	11.00	7.76250	5.17361	4.20185	GR-356_Ctrl_10D_peak_3564
chr8	21683964	21684183	220	21684056	9.00	6.32821	4.60223	2.89837	GR-356_Ctrl_10D_peak_3565
chr8	22178846	22179056	211	22178949	11.00	7.34068	4.90917	3.80450	GR-356_Ctrl_10D_peak_3566
chr8	22191033	22191347	315	22191201	25.00	26.89827	12.92510	22.54683	GR-356_Ctrl_10D_peak_3567
chr8	22597257	22597648	392	22597451	17.00	14.18108	7.76041	10.26550	GR-356_Ctrl_10D_peak_3568
chr8	23356103	23356364	262	23356199	23.00	16.63569	7.57908	12.62046	GR-356_Ctrl_10D_peak_3569
chr8	23761645	23761982	338	23761792	23.00	16.63569	7.57908	12.62046	GR-356_Ctrl_10D_peak_3570
chr8	23789498	23790043	546	23789895	19.00	14.90097	7.65498	10.94791	GR-356_Ctrl_10D_peak_3571
chr8	23798151	23798782	632	23798608	34.00	38.08564	16.10782	33.47093	GR-356_Ctrl_10D_peak_3572
chr8	25073560	25073927	368	25073737	33.00	38.52033	16.77976	33.90182	GR-356_Ctrl_10D_peak_3573
chr8	25175267	25175568	302	25175406	17.00	14.34473	7.85977	10.42438	GR-356_Ctrl_10D_peak_3574
chr8	25179694	25179945	252	25179782	15.00	9.61549	5.50605	5.92870	GR-356_Ctrl_10D_peak_3575
chr8	26641677	26642021	345	26641852	35.00	30.17815	11.25314	25.74532	GR-356_Ctrl_10D_peak_3576
chr8	27282536	27282809	274	27282698	19.00	17.48569	9.20447	13.43903	GR-356_Ctrl_10D_peak_3577
chr8	28004601	28004857	257	28004727	14.00	10.84639	6.46701	7.08551	GR-356_Ctrl_10D_peak_3578
chr8	28348194	28348485	292	28348356	22.00	17.50084	8.33549	13.45208	GR-356_Ctrl_10D_peak_3579
chr8	28351434	28351932	499	28351568	27.00	25.44601	11.35409	21.13571	GR-356_Ctrl_10D_peak_3580
chr8	28390229	28390448	220	28390409	16.00	9.72846	5.36852	6.02673	GR-356_Ctrl_10D_peak_3581
chr8	29249990	29250338	349	29250143	43.00	48.01141	18.00028	43.20510	GR-356_Ctrl_10D_peak_3582
chr8	29314415	29314686	272	29314573	17.00	11.02729	5.89680	7.25848	GR-356_Ctrl_10D_peak_3583
chr8	29555423	29555686	264	29555550	21.00	14.56176	6.94749	10.62918	GR-356_Ctrl_10D_peak_3584
chr8	29556340	29556850	511	29556596	25.00	22.89809	10.54308	18.66389	GR-356_Ctrl_10D_peak_3585
chr8	29637597	29637800	204	29637682	15.00	7.12379	4.11437	3.61532	GR-356_Ctrl_10D_peak_3586
chr8	29655496	29655698	203	29655578	15.00	8.83037	5.05272	5.18296	GR-356_Ctrl_10D_peak_3587
chr8	29848243	29848555	313	29848412	22.00	21.30750	10.58514	17.12285	GR-356_Ctrl_10D_peak_3588
chr8	29887474	29887879	406	29887690	38.00	40.69304	15.95480	36.02562	GR-356_Ctrl_10D_peak_3589
chr8	29926694	29926993	300	29926824	23.00	16.49401	7.50209	12.48632	GR-356_Ctrl_10D_peak_3590
chr8	29975281	29975571	291	29975400	22.00	19.20033	9.32657	15.08950	GR-356_Ctrl_10D_peak_3591
chr8	30724220	30724687	468	30724366	19.00	8.72066	4.33744	5.08718	GR-356_Ctrl_10D_peak_3592
chr8	30804233	30804903	671	30804757	33.00	27.76071	10.62796	23.39021	GR-356_Ctrl_10D_peak_3593
chr8	30807552	30807890	339	30807710	36.00	37.84072	15.13660	33.23230	GR-356_Ctrl_10D_peak_3594
chr8	32323527	32323735	209	32323681	13.00	11.61892	7.16865	7.81423	GR-356_Ctrl_10D_peak_3595
chr8	32432998	32433211	214	32433133	16.00	11.68258	6.50673	7.87434	GR-356_Ctrl_10D_peak_3596
chr8	33213714	33214039	326	33213904	17.00	10.65101	5.68431	6.89792	GR-356_Ctrl_10D_peak_3597
chr8	37543840	37544262	423	37544090	35.00	34.77985	13.77896	30.24303	GR-356_Ctrl_10D_peak_3598
chr8	38314390	38314766	377	38314574	24.00	21.80094	10.22743	17.60134	GR-356_Ctrl_10D_peak_3599
chr8	38659881	38660480	600	38660119	34.00	35.03465	14.31841	30.48792	GR-356_Ctrl_10D_peak_3600
chr8	38892109	38892327	219	38892178	15.00	11.25988	6.48805	7.47609	GR-356_Ctrl_10D_peak_3601
chr8	38936646	38936999	354	38936805	27.00	25.44601	11.35409	21.13571	GR-356_Ctrl_10D_peak_3602
chr8	39001243	39001618	376	39001422	48.00	33.42299	9.18770	28.91755	GR-356_Ctrl_10D_peak_3603
chr8	40174556	40175205	650	40174732	23.00	22.61936	11.04536	18.39483	GR-356_Ctrl_10D_peak_3604
chr8	40350019	40350295	277	40350144	11.00	7.27170	4.86604	3.75222	GR-356_Ctrl_10D_peak_3605
chr8	40442989	40443223	235	40443101	18.00	12.54767	6.53844	8.70243	GR-356_Ctrl_10D_peak_3606
chr8	42214996	42215381	386	42215153	16.00	13.04442	7.32928	9.17460	GR-356_Ctrl_10D_peak_3607
chr8	42256626	42256977	352	42256819	25.00	13.61351	5.63867	9.71280	GR-356_Ctrl_10D_peak_3608
chr8	42300202	42300671	470	42300488	26.00	16.80506	6.94299	12.78369	GR-356_Ctrl_10D_peak_3609
chr8	42326213	42326551	339	42326387	21.00	20.01406	10.12492	15.87270	GR-356_Ctrl_10D_peak_3610
chr8	47353407	47353942	536	47353764	45.00	37.77456	11.82880	33.17066	GR-356_Ctrl_10D_peak_3611
chr8	47659332	47659726	395	47659482	36.00	39.24172	15.95195	34.60887	GR-356_Ctrl_10D_peak_3612
chr8	48151271	48151531	261	48151443	16.00	12.42749	6.95465	8.58616	GR-356_Ctrl_10D_peak_3613
chr8	48316762	48316990	229	48316877	15.00	11.38834	6.56612	7.59796	GR-356_Ctrl_10D_peak_3614
chr8	48318439	48318641	203	48318560	10.00	6.41677	4.50007	2.96268	GR-356_Ctrl_10D_peak_3615
chr8	48370047	48370399	353	48370243	22.00	20.08759	9.85380	15.94448	GR-356_Ctrl_10D_peak_3616
chr8	48536050	48536326	277	48536182	14.00	11.78544	7.04597	7.97621	GR-356_Ctrl_10D_peak_3617
chr8	48590094	48590565	472	48590387	41.00	40.19159	14.45338	35.54292	GR-356_Ctrl_10D_peak_3618
chr8	48591546	48592164	619	48591809	72.00	101.09782	33.59631	95.51854	GR-356_Ctrl_10D_peak_3619
chr8	48628302	48628998	697	48628810	52.00	49.67279	15.17615	44.84044	GR-356_Ctrl_10D_peak_3620
chr8	50056326	50056836	511	50056435	15.00	11.25988	6.48805	7.47609	GR-356_Ctrl_10D_peak_3621
chr8	50056979	50057385	407	50057167	25.00	18.78006	8.21068	14.68246	GR-356_Ctrl_10D_peak_3622
chr8	50139706	50139910	205	50139824	12.00	9.98659	6.36970	6.27508	GR-356_Ctrl_10D_peak_3623
chr8	52146696	52147076	381	52146908	28.00	26.92145	11.86382	22.56609	GR-356_Ctrl_10D_peak_3624
chr8	52764327	52764535	209	52764407	16.00	14.88028	8.45103	10.92971	GR-356_Ctrl_10D_peak_3625
chr8	53513995	53514597	603	53514449	23.00	16.49401	7.50209	12.48632	GR-356_Ctrl_10D_peak_3626
chr8	54209532	54209742	211	54209632	17.00	11.54664	6.19431	7.75095	GR-356_Ctrl_10D_peak_3627
chr8	56220552	56220863	312	56220699	20.00	19.89701	10.36397	15.75988	GR-356_Ctrl_10D_peak_3628
chr8	57512413	57512628	216	57512558	15.00	11.35453	6.54556	7.56438	GR-356_Ctrl_10D_peak_3629
chr8	58879505	58879764	260	58879674	21.00	18.94946	9.48495	14.84561	GR-356_Ctrl_10D_peak_3630
chr8	60807899	60808212	314	60808069	21.00	21.09965	10.77950	16.92216	GR-356_Ctrl_10D_peak_3631
chr8	66119868	66120070	203	66119964	12.00	9.36569	5.98290	5.68975	GR-356_Ctrl_10D_peak_3632
chr8	66123952	66124211	260	66124115	14.00	6.37500	3.85722	2.93436	GR-356_Ctrl_10D_peak_3633
chr8	66535704	66535989	286	66535954	10.00	6.41677	4.50007	2.96268	GR-356_Ctrl_10D_peak_3634
chr8	69569013	69569353	341	69569153	12.00	10.93743	6.95603	7.17142	GR-356_Ctrl_10D_peak_3635
chr8	70559188	70559390	203	70559224	10.00	4.76356	3.47375	1.50489	GR-356_Ctrl_10D_peak_3636
chr8	70610364	70610756	393	70610644	22.00	14.87042	6.87446	10.92301	GR-356_Ctrl_10D_peak_3637
chr8	75554837	75555115	279	75554977	17.00	17.26211	9.63142	13.22009	GR-356_Ctrl_10D_peak_3638
chr8	76616873	76617241	369	76617072	35.00	30.39722	11.36863	25.95806	GR-356_Ctrl_10D_peak_3639
chr8	80026550	80026752	203	80026668	11.00	9.46368	6.23822	5.78603	GR-356_Ctrl_10D_peak_3640
chr8	80301240	80301485	246	80301331	15.00	13.46672	7.83964	9.58161	GR-356_Ctrl_10D_peak_3641
chr8	81047943	81048228	286	81048071	19.00	12.98741	6.55200	9.12393	GR-356_Ctrl_10D_peak_3642
chr8	81211952	81212154	203	81212068	11.00	7.34068	4.90917	3.80450	GR-356_Ctrl_10D_peak_3643
chr8	81288251	81288574	324	81288432	11.00	7.34068	4.90917	3.80450	GR-356_Ctrl_10D_peak_3644
chr8	90001476	90002008	533	90001774	64.00	91.84145	32.79072	86.37868	GR-356_Ctrl_10D_peak_3645
chr8	93873834	93874097	264	93873971	14.00	10.30761	6.13646	6.57570	GR-356_Ctrl_10D_peak_3646
chr8	93935956	93936281	326	93936156	18.00	9.51884	4.88581	5.83557	GR-356_Ctrl_10D_peak_3647
chr8	95702459	95702701	243	95702600	12.00	8.75946	5.60474	5.12077	GR-356_Ctrl_10D_peak_3648
chr8	95792923	95793195	273	95793076	21.00	18.13681	9.00014	14.06386	GR-356_Ctrl_10D_peak_3649
chr8	95800411	95800871	461	95800643	51.00	62.20804	22.41896	57.16162	GR-356_Ctrl_10D_peak_3650
chr8	95801893	95802311	419	95802123	33.00	29.75025	11.70036	25.32212	GR-356_Ctrl_10D_peak_3651
chr8	96337946	96338299	354	96338134	15.00	8.83037	5.05272	5.18296	GR-356_Ctrl_10D_peak_3652
chr8	96821749	96822005	257	96821842	16.00	12.42749	6.95465	8.58616	GR-356_Ctrl_10D_peak_3653
chr8	98146903	98147198	296	98147051	11.00	9.70041	6.38419	6.00564	GR-356_Ctrl_10D_peak_3654
chr8	98166807	98167113	307	98166954	21.00	16.38297	7.97308	12.37675	GR-356_Ctrl_10D_peak_3655
chr8	98834979	98835181	203	98835031	14.00	7.95815	4.73693	4.37816	GR-356_Ctrl_10D_peak_3656
chr8	99705776	99706137	362	99705939	47.00	58.26898	22.09072	53.29343	GR-356_Ctrl_10D_peak_3657
chr8	101098580	101098782	203	101098673	12.00	10.06080	6.41579	6.34686	GR-356_Ctrl_10D_peak_3658
chr8	101108784	101109080	297	101108869	15.00	8.74009	5.00139	5.10498	GR-356_Ctrl_10D_peak_3659
chr8	102788986	102789277	292	102789157	18.00	14.64586	7.77285	10.70526	GR-356_Ctrl_10D_peak_3660
chr8	102791014	102791226	213	102791104	15.00	8.83037	5.05272	5.18296	GR-356_Ctrl_10D_peak_3661
chr8	105069848	105070050	203	105069989	20.00	9.48921	4.55431	5.80980	GR-356_Ctrl_10D_peak_3662
chr8	115576486	115576792	307	115576639	21.00	21.22910	10.85749	17.04897	GR-356_Ctrl_10D_peak_3663
chr8	117810913	117811777	865	117811518	79.00	92.92145	25.26362	87.44421	GR-356_Ctrl_10D_peak_3664
chr8	117847662	117847952	291	117847812	17.00	12.73252	6.88948	8.87421	GR-356_Ctrl_10D_peak_3665
chr8	117928035	117928401	367	117928216	42.00	46.25847	17.43664	41.48437	GR-356_Ctrl_10D_peak_3666
chr8	117955016	117955608	593	117955489	29.00	28.23959	12.27292	23.85041	GR-356_Ctrl_10D_peak_3667
chr8	117978343	117978686	344	117978484	22.00	14.87042	6.87446	10.92301	GR-356_Ctrl_10D_peak_3668
chr8	118202195	118202412	218	118202323	14.00	9.65783	5.74123	5.96542	GR-356_Ctrl_10D_peak_3669
chr8	118332735	118333114	380	118332914	27.00	17.79320	7.20014	13.73126	GR-356_Ctrl_10D_peak_3670
chr8	118415718	118415958	241	118415812	15.00	10.65720	6.12398	6.90103	GR-356_Ctrl_10D_peak_3671
chr8	119565131	119565375	245	119565262	18.00	13.80571	7.27223	9.90112	GR-356_Ctrl_10D_peak_3672
chr8	120993277	120993508	232	120993361	24.00	12.75363	5.42180	8.89377	GR-356_Ctrl_10D_peak_3673
chr8	121164094	121164374	281	121164241	25.00	20.11907	8.94733	15.97394	GR-356_Ctrl_10D_peak_3674
chr8	121743006	121743370	365	121743192	40.00	36.67540	12.94760	32.08898	GR-356_Ctrl_10D_peak_3675
chr8	122084541	122084776	236	122084639	21.00	18.13681	9.00014	14.06386	GR-356_Ctrl_10D_peak_3676
chr8	122601721	122602112	392	122601962	25.00	18.78006	8.21068	14.68246	GR-356_Ctrl_10D_peak_3677
chr8	122637567	122637803	237	122637690	21.00	14.56176	6.94749	10.62918	GR-356_Ctrl_10D_peak_3678
chr8	123536412	123536616	205	123536554	12.00	8.99264	5.75012	5.34066	GR-356_Ctrl_10D_peak_3679
chr8	123630524	123630780	257	123630615	19.00	12.98741	6.55200	9.12393	GR-356_Ctrl_10D_peak_3680
chr8	123632967	123633286	320	123633127	32.00	22.95109	8.48588	18.71434	GR-356_Ctrl_10D_peak_3681
chr8	123680615	123680817	203	123680644	12.00	7.74386	4.97573	4.18694	GR-356_Ctrl_10D_peak_3682
chr8	125110981	125111183	203	125111061	14.00	12.36472	7.40284	8.52987	GR-356_Ctrl_10D_peak_3683
chr8	125278339	125278613	275	125278478	13.00	10.37555	6.39995	6.63821	GR-356_Ctrl_10D_peak_3684
chr8	127222795	127223177	383	127222878	12.00	6.29799	4.10534	2.87237	GR-356_Ctrl_10D_peak_3685
chr8	127294772	127295059	288	127294932	19.00	19.19849	10.24093	15.08950	GR-356_Ctrl_10D_peak_3686
chr8	127391072	127391629	558	127391267	28.00	18.79646	7.45729	14.69530	GR-356_Ctrl_10D_peak_3687
chr8	127596193	127596408	216	127596327	15.00	8.83037	5.05272	5.18296	GR-356_Ctrl_10D_peak_3688
chr8	127845514	127846015	502	127845759	72.00	94.14899	29.60173	88.65821	GR-356_Ctrl_10D_peak_3689
chr8	127852041	127852309	269	127852150	10.00	7.52641	5.20288	3.97658	GR-356_Ctrl_10D_peak_3690
chr8	127854027	127854659	633	127854366	28.00	23.62295	9.97972	19.36412	GR-356_Ctrl_10D_peak_3691
chr8	127907881	127908104	224	127908024	16.00	10.56882	5.85018	6.82410	GR-356_Ctrl_10D_peak_3692
chr8	127918492	127918935	444	127918739	47.00	50.06593	17.39580	45.22454	GR-356_Ctrl_10D_peak_3693
chr8	127949738	127949965	228	127949822	20.00	11.22712	5.40011	7.44680	GR-356_Ctrl_10D_peak_3694
chr8	127969486	127969780	295	127969657	21.00	12.11161	5.65725	8.28673	GR-356_Ctrl_10D_peak_3695
chr8	128141880	128142174	295	128142038	16.00	15.62809	8.90535	11.65498	GR-356_Ctrl_10D_peak_3696
chr8	128176614	128177335	722	128177064	82.00	88.86375	21.92555	83.43906	GR-356_Ctrl_10D_peak_3697
chr8	128183329	128183673	345	128183510	29.00	26.87443	11.48246	22.52304	GR-356_Ctrl_10D_peak_3698
chr8	128314643	128314918	276	128314687	21.00	8.83310	4.12509	5.18506	GR-356_Ctrl_10D_peak_3699
chr8	128540575	128540858	284	128540729	31.00	19.09414	6.93990	14.98627	GR-356_Ctrl_10D_peak_3700
chr8	128786189	128786459	271	128786311	18.00	16.85975	9.11318	12.83519	GR-356_Ctrl_10D_peak_3701
chr8	128787735	128788140	406	128787878	27.00	17.79320	7.20014	13.73126	GR-356_Ctrl_10D_peak_3702
chr8	128900686	128901022	337	128900853	20.00	16.95276	8.59104	12.92164	GR-356_Ctrl_10D_peak_3703
chr8	129459910	129460127	218	129460016	13.00	9.78813	6.03587	6.07882	GR-356_Ctrl_10D_peak_3704
chr8	130061993	130062488	496	130062292	35.00	26.20401	9.25733	21.87060	GR-356_Ctrl_10D_peak_3705
chr8	130193611	130194164	554	130193813	23.00	13.93699	6.17155	10.02573	GR-356_Ctrl_10D_peak_3706
chr8	130194765	130194967	203	130194882	12.00	8.22331	5.27154	4.62849	GR-356_Ctrl_10D_peak_3707
chr8	130232823	130233130	308	130232979	13.00	9.78813	6.03587	6.07882	GR-356_Ctrl_10D_peak_3708
chr8	130444759	130445184	426	130444896	17.00	8.69704	4.62866	5.06540	GR-356_Ctrl_10D_peak_3709
chr8	130483233	130483736	504	130483461	40.00	47.18244	18.86916	42.39344	GR-356_Ctrl_10D_peak_3710
chr8	132877344	132877553	210	132877502	18.00	11.59671	6.00011	7.79238	GR-356_Ctrl_10D_peak_3711
chr8	133033241	133033631	391	133033434	32.00	33.98877	14.50242	29.46821	GR-356_Ctrl_10D_peak_3712
chr8	133036764	133037340	577	133036949	61.00	60.49686	17.03798	55.48087	GR-356_Ctrl_10D_peak_3713
chr8	133049830	133050113	284	133049956	9.00	6.85076	4.93522	3.36332	GR-356_Ctrl_10D_peak_3714
chr8	133161953	133162246	294	133162131	16.00	15.19048	8.63993	11.23234	GR-356_Ctrl_10D_peak_3715
chr8	133216550	133216774	225	133216667	13.00	9.20658	5.67704	5.54393	GR-356_Ctrl_10D_peak_3716
chr8	133356237	133356527	291	133356357	20.00	13.55309	6.63170	9.65682	GR-356_Ctrl_10D_peak_3717
chr8	133674800	133675377	578	133675185	41.00	41.58947	15.22133	36.90856	GR-356_Ctrl_10D_peak_3718
chr8	139370324	139370694	371	139370515	46.00	45.60778	15.39721	40.84888	GR-356_Ctrl_10D_peak_3719
chr8	140591402	140591729	328	140591543	34.00	25.10741	9.00018	20.80608	GR-356_Ctrl_10D_peak_3720
chr8	141018718	141019030	313	141018904	21.00	17.65309	8.71385	13.60185	GR-356_Ctrl_10D_peak_3721
chr8	141043326	141043606	281	141043457	33.00	27.76071	10.62796	23.39021	GR-356_Ctrl_10D_peak_3722
chr8	141127284	141127684	401	141127501	16.00	6.54374	3.68682	3.07554	GR-356_Ctrl_10D_peak_3723
chr8	141227745	141228284	540	141227979	38.00	29.56363	10.02877	25.14299	GR-356_Ctrl_10D_peak_3724
chr8	141228528	141228730	203	141228699	14.00	10.30761	6.13646	6.57570	GR-356_Ctrl_10D_peak_3725
chr8	142235116	142235393	278	142235216	16.00	14.78004	8.38988	10.83391	GR-356_Ctrl_10D_peak_3726
chr8	142681839	142682162	324	142682000	62.00	63.37631	18.03957	58.31169	GR-356_Ctrl_10D_peak_3727
chr8	143547252	143547512	261	143547417	29.00	19.81433	7.71444	15.68581	GR-356_Ctrl_10D_peak_3728
chr8	143798265	143798514	250	143798332	14.00	10.21939	6.08255	6.49609	GR-356_Ctrl_10D_peak_3729
chr8	143936517	143936907	391	143936685	28.00	25.60407	11.09972	21.28617	GR-356_Ctrl_10D_peak_3730
chr8	143940209	143940676	468	143940558	14.00	8.68811	5.16192	5.06073	GR-356_Ctrl_10D_peak_3731
chr8	143952862	143953094	233	143952934	17.00	12.11235	6.52342	8.28673	GR-356_Ctrl_10D_peak_3732
chr8	144767420	144767622	203	144767551	15.00	8.74009	5.00139	5.10498	GR-356_Ctrl_10D_peak_3733
chr9	2810178	2810514	337	2810364	28.00	21.94347	9.06503	17.73740	GR-356_Ctrl_10D_peak_3734
chr9	4137238	4137491	254	4137339	18.00	14.64586	7.77285	10.70526	GR-356_Ctrl_10D_peak_3735
chr9	4225363	4225705	343	4225505	21.00	14.56176	6.94749	10.62918	GR-356_Ctrl_10D_peak_3736
chr9	4237777	4238091	315	4237972	18.00	14.53192	7.70456	10.60465	GR-356_Ctrl_10D_peak_3737
chr9	4301959	4302258	300	4302059	13.00	11.03847	6.81076	7.26925	GR-356_Ctrl_10D_peak_3738
chr9	4866261	4866463	203	4866310	8.00	6.44733	4.81571	2.98262	GR-356_Ctrl_10D_peak_3739
chr9	5389301	5389503	203	5389404	16.00	7.89826	4.37151	4.32601	GR-356_Ctrl_10D_peak_3740
chr9	5509738	5509960	223	5509786	19.00	10.36255	5.14296	6.62581	GR-356_Ctrl_10D_peak_3741
chr9	14022175	14022469	295	14022337	19.00	12.56442	6.31590	8.71315	GR-356_Ctrl_10D_peak_3742
chr9	14027179	14027466	288	14027359	25.00	23.05716	10.63653	18.81376	GR-356_Ctrl_10D_peak_3743
chr9	14030255	14030600	346	14030420	25.00	18.78006	8.21068	14.68246	GR-356_Ctrl_10D_peak_3744
chr9	14320361	14320589	229	14320432	14.00	10.21939	6.08255	6.49609	GR-356_Ctrl_10D_peak_3745
chr9	15211469	15211739	271	15211573	17.00	13.52504	7.36375	9.63421	GR-356_Ctrl_10D_peak_3746
chr9	16030567	16030852	286	16030709	21.00	13.87695	6.57557	9.96892	GR-356_Ctrl_10D_peak_3747
chr9	16191802	16192042	241	16191880	13.00	8.68610	5.35848	5.06032	GR-356_Ctrl_10D_peak_3748
chr9	16335881	16336113	233	16336032	16.00	11.68258	6.50673	7.87434	GR-356_Ctrl_10D_peak_3749
chr9	16705075	16705566	492	16705381	15.00	7.12379	4.11437	3.61532	GR-356_Ctrl_10D_peak_3750
chr9	16868065	16868322	258	16868176	15.00	11.35453	6.54556	7.56438	GR-356_Ctrl_10D_peak_3751
chr9	18268478	18268680	203	18268570	12.00	7.74386	4.97573	4.18694	GR-356_Ctrl_10D_peak_3752
chr9	18490603	18490897	295	18490704	21.00	13.87695	6.57557	9.96892	GR-356_Ctrl_10D_peak_3753
chr9	18632927	18633129	203	18633000	15.00	11.25988	6.48805	7.47609	GR-356_Ctrl_10D_peak_3754
chr9	19118936	19119306	371	19119111	35.00	36.43174	14.72750	31.85554	GR-356_Ctrl_10D_peak_3755
chr9	19992672	19993004	333	19992838	19.00	12.56442	6.31590	8.71315	GR-356_Ctrl_10D_peak_3756
chr9	19999497	19999858	362	19999613	21.00	17.15361	8.42047	13.11785	GR-356_Ctrl_10D_peak_3757
chr9	20297710	20297966	257	20297873	10.00	7.88452	5.42875	4.31631	GR-356_Ctrl_10D_peak_3758
chr9	21688787	21689108	322	21688946	34.00	34.81747	14.19261	30.27781	GR-356_Ctrl_10D_peak_3759
chr9	22055110	22055322	213	22055170	11.00	7.27170	4.86604	3.75222	GR-356_Ctrl_10D_peak_3760
chr9	22099031	22099253	223	22099123	19.00	17.18407	9.02185	13.14681	GR-356_Ctrl_10D_peak_3761
chr9	22148322	22148537	216	22148413	17.00	10.65101	5.68431	6.89792	GR-356_Ctrl_10D_peak_3762
chr9	22342456	22342765	310	22342603	22.00	18.30915	8.80322	14.23111	GR-356_Ctrl_10D_peak_3763
chr9	26265135	26265508	374	26265326	10.00	6.41677	4.50007	2.96268	GR-356_Ctrl_10D_peak_3764
chr9	27094586	27094826	241	27094721	12.00	10.93743	6.95603	7.17142	GR-356_Ctrl_10D_peak_3765
chr9	28234739	28235132	394	28234939	28.00	18.79646	7.45729	14.69530	GR-356_Ctrl_10D_peak_3766
chr9	33101557	33101812	256	33101642	14.00	9.65783	5.74123	5.96542	GR-356_Ctrl_10D_peak_3767
chr9	33162975	33163344	370	33163148	24.00	22.61730	10.71065	18.39441	GR-356_Ctrl_10D_peak_3768
chr9	33946878	33947123	246	33947015	14.00	12.27826	7.34966	8.44848	GR-356_Ctrl_10D_peak_3769
chr9	35367561	35367859	299	35367729	25.00	25.29535	11.96581	20.99092	GR-356_Ctrl_10D_peak_3770
chr9	35511169	35511412	244	35511301	25.00	15.83259	6.68585	11.84545	GR-356_Ctrl_10D_peak_3771
chr9	35518139	35518469	331	35518315	20.00	18.21723	9.34928	14.14256	GR-356_Ctrl_10D_peak_3772
chr9	35907825	35908185	361	35908012	28.00	18.79646	7.45729	14.69530	GR-356_Ctrl_10D_peak_3773
chr9	36029852	36030078	227	36029923	17.00	13.41753	7.29906	9.53508	GR-356_Ctrl_10D_peak_3774
chr9	36585105	36585348	244	36585231	16.00	11.68258	6.50673	7.87434	GR-356_Ctrl_10D_peak_3775
chr9	37944855	37945358	504	37945033	42.00	38.99736	13.44125	34.36911	GR-356_Ctrl_10D_peak_3776
chr9	38682694	38682980	287	38682877	24.00	16.91158	7.47224	12.88545	GR-356_Ctrl_10D_peak_3777
chr9	38968540	38969142	603	38968784	97.00	110.06560	25.20050	104.38200	GR-356_Ctrl_10D_peak_3778
chr9	39030622	39031023	402	39030872	45.00	37.49552	11.69845	32.90261	GR-356_Ctrl_10D_peak_3779
chr9	39674634	39674890	257	39674751	13.00	8.21603	5.07378	4.62604	GR-356_Ctrl_10D_peak_3780
chr9	40502305	40502781	477	40502544	61.00	73.31903	23.73043	68.10157	GR-356_Ctrl_10D_peak_3781
chr9	40507118	40507522	405	40507342	11.00	9.23878	6.09878	5.57418	GR-356_Ctrl_10D_peak_3782
chr9	40639590	40639885	296	40639823	17.00	13.52504	7.36375	9.63421	GR-356_Ctrl_10D_peak_3783
chr9	41790687	41791297	611	41790993	35.00	34.77985	13.77896	30.24303	GR-356_Ctrl_10D_peak_3784
chr9	41852360	41852681	322	41852557	38.00	26.08930	8.45801	21.75888	GR-356_Ctrl_10D_peak_3785
chr9	41905620	41905822	203	41905695	13.00	10.51574	6.48690	6.77479	GR-356_Ctrl_10D_peak_3786
chr9	42339881	42340091	211	42339989	17.00	10.10331	5.38001	6.38706	GR-356_Ctrl_10D_peak_3787
chr9	42431029	42431290	262	42431144	19.00	13.57074	6.88256	9.67154	GR-356_Ctrl_10D_peak_3788
chr9	43130562	43131139	578	43130848	67.00	66.30157	17.48606	61.19030	GR-356_Ctrl_10D_peak_3789
chr9	43139207	43139453	247	43139286	23.00	20.56168	9.81834	16.40304	GR-356_Ctrl_10D_peak_3790
chr9	43140273	43140591	319	43140393	23.00	20.56168	9.81834	16.40304	GR-356_Ctrl_10D_peak_3791
chr9	43270455	43270731	277	43270545	14.00	7.95815	4.73693	4.37816	GR-356_Ctrl_10D_peak_3792
chr9	60950617	60951119	503	60950788	14.00	10.30761	6.13646	6.57570	GR-356_Ctrl_10D_peak_3793
chr9	61226029	61226561	533	61226188	21.00	18.13681	9.00014	14.06386	GR-356_Ctrl_10D_peak_3794
chr9	63113709	63114051	343	63113900	22.00	19.20033	9.32657	15.08950	GR-356_Ctrl_10D_peak_3795
chr9	63117359	63117879	521	63117608	14.00	11.86466	7.09483	8.05383	GR-356_Ctrl_10D_peak_3796
chr9	63122000	63122693	694	63122420	85.00	113.22740	32.91640	107.50446	GR-356_Ctrl_10D_peak_3797
chr9	63337773	63338494	722	63338026	89.00	82.71969	16.87536	77.38029	GR-356_Ctrl_10D_peak_3798
chr9	63346391	63346730	340	63346572	21.00	12.11161	5.65725	8.28673	GR-356_Ctrl_10D_peak_3799
chr9	63438704	63439067	364	63438882	19.00	14.90097	7.65498	10.94791	GR-356_Ctrl_10D_peak_3800
chr9	64642200	64642838	639	64642522	66.00	99.02330	35.85029	93.47398	GR-356_Ctrl_10D_peak_3801
chr9	64647099	64647523	425	64647282	16.00	15.62809	8.90535	11.65498	GR-356_Ctrl_10D_peak_3802
chr9	64762614	64763119	506	64762807	15.00	11.35453	6.54556	7.56438	GR-356_Ctrl_10D_peak_3803
chr9	65147442	65148035	594	65147674	63.00	79.50083	26.18223	74.20152	GR-356_Ctrl_10D_peak_3804
chr9	65248017	65248638	622	65248299	14.00	11.94500	7.14437	8.12957	GR-356_Ctrl_10D_peak_3805
chr9	65773300	65773937	638	65773803	17.00	10.65101	5.68431	6.89792	GR-356_Ctrl_10D_peak_3806
chr9	65865179	65865575	397	65865380	19.00	17.48569	9.20447	13.43903	GR-356_Ctrl_10D_peak_3807
chr9	65869063	65869334	272	65869152	19.00	18.58504	9.87045	14.50188	GR-356_Ctrl_10D_peak_3808
chr9	65873506	65874154	649	65873866	93.00	152.14737	50.29743	145.99628	GR-356_Ctrl_10D_peak_3809
chr9	66701967	66702191	225	66702093	14.00	7.95815	4.73693	4.37816	GR-356_Ctrl_10D_peak_3810
chr9	66955893	66956211	319	66956054	19.00	12.44848	6.25174	8.60573	GR-356_Ctrl_10D_peak_3811
chr9	67281633	67281899	267	67281742	12.00	9.63177	6.14885	5.94279	GR-356_Ctrl_10D_peak_3812
chr9	67334746	67335151	406	67334910	36.00	21.40624	6.93765	17.21871	GR-356_Ctrl_10D_peak_3813
chr9	67394746	67395422	677	67395145	74.00	58.77847	12.38560	53.79158	GR-356_Ctrl_10D_peak_3814
chr9	69097190	69097461	272	69097289	26.00	25.33835	11.64062	21.03123	GR-356_Ctrl_10D_peak_3815
chr9	69857244	69857552	309	69857408	17.00	10.65101	5.68431	6.89792	GR-356_Ctrl_10D_peak_3816
chr9	69885462	69885868	407	69885739	39.00	46.72871	19.05166	41.94579	GR-356_Ctrl_10D_peak_3817
chr9	69898748	69899212	465	69899068	23.00	22.61936	11.04536	18.39483	GR-356_Ctrl_10D_peak_3818
chr9	70419032	70419356	325	70419174	15.00	9.16004	5.24160	5.50222	GR-356_Ctrl_10D_peak_3819
chr9	70419452	70419654	203	70419599	12.00	6.29799	4.10534	2.87237	GR-356_Ctrl_10D_peak_3820
chr9	70419745	70420405	661	70420111	59.00	62.69857	18.94771	57.64156	GR-356_Ctrl_10D_peak_3821
chr9	70438583	70438907	325	70438754	24.00	21.80094	10.22743	17.60134	GR-356_Ctrl_10D_peak_3822
chr9	70480691	70481050	360	70480873	28.00	22.11738	9.15806	17.90403	GR-356_Ctrl_10D_peak_3823
chr9	70488703	70488919	217	70488798	11.00	8.95550	5.92227	5.30388	GR-356_Ctrl_10D_peak_3824
chr9	70534131	70534338	208	70534208	20.00	15.28427	7.61066	11.32375	GR-356_Ctrl_10D_peak_3825
chr9	70601130	70601888	759	70601736	45.00	44.24755	15.06961	39.51415	GR-356_Ctrl_10D_peak_3826
chr9	71680663	71680958	296	71680774	22.00	19.34005	9.40924	15.22368	GR-356_Ctrl_10D_peak_3827
chr9	72365656	72366124	469	72365881	28.00	29.43049	13.34648	25.01581	GR-356_Ctrl_10D_peak_3828
chr9	73780848	73781105	258	73781008	17.00	17.17031	9.57629	13.13346	GR-356_Ctrl_10D_peak_3829
chr9	76654475	76654918	444	76654718	66.00	58.74534	14.53042	53.75876	GR-356_Ctrl_10D_peak_3830
chr9	76876219	76876448	230	76876298	15.00	12.69114	7.36357	8.83583	GR-356_Ctrl_10D_peak_3831
chr9	77712732	77713202	471	77712906	29.00	28.23959	12.27292	23.85041	GR-356_Ctrl_10D_peak_3832
chr9	78539984	78540220	237	78540060	13.00	11.11759	6.85968	7.34324	GR-356_Ctrl_10D_peak_3833
chr9	79489391	79489630	240	79489532	23.00	22.61936	11.04536	18.39483	GR-356_Ctrl_10D_peak_3834
chr9	80556698	80557018	321	80556844	30.00	29.57192	12.68202	25.14774	GR-356_Ctrl_10D_peak_3835
chr9	81389470	81389859	390	81389708	29.00	24.82092	10.32385	20.52627	GR-356_Ctrl_10D_peak_3836
chr9	81499080	81499394	315	81499244	33.00	29.75025	11.70036	25.32212	GR-356_Ctrl_10D_peak_3837
chr9	81559799	81560022	224	81559898	12.00	9.17548	5.86420	5.51723	GR-356_Ctrl_10D_peak_3838
chr9	81562753	81562955	203	81562845	12.00	7.31121	4.71136	3.78466	GR-356_Ctrl_10D_peak_3839
chr9	81588052	81588549	498	81588370	67.00	85.72327	27.57421	80.33870	GR-356_Ctrl_10D_peak_3840
chr9	83934610	83934877	268	83934732	17.00	15.04171	8.28402	11.08517	GR-356_Ctrl_10D_peak_3841
chr9	84976045	84976352	308	84976236	18.00	11.59671	6.00011	7.79238	GR-356_Ctrl_10D_peak_3842
chr9	85536066	85536409	344	85536245	21.00	22.64114	11.70435	18.41603	GR-356_Ctrl_10D_peak_3843
chr9	86983457	86984428	972	86983726	61.00	85.23873	30.59839	79.86097	GR-356_Ctrl_10D_peak_3844
chr9	87270551	87270813	263	87270684	18.00	16.25263	8.74424	12.25068	GR-356_Ctrl_10D_peak_3845
chr9	87607343	87607592	250	87607447	23.00	17.86373	8.25908	13.80007	GR-356_Ctrl_10D_peak_3846
chr9	88076682	88077179	498	88076937	45.00	55.05368	21.17028	50.13304	GR-356_Ctrl_10D_peak_3847
chr9	88766848	88767081	234	88766974	13.00	11.61892	7.16865	7.81423	GR-356_Ctrl_10D_peak_3848
chr9	88776790	88777036	247	88776962	17.00	10.65101	5.68431	6.89792	GR-356_Ctrl_10D_peak_3849
chr9	88852665	88853277	613	88852922	95.00	134.67554	38.92830	128.72360	GR-356_Ctrl_10D_peak_3850
chr9	89021270	89021514	245	89021415	14.00	10.84639	6.46701	7.08551	GR-356_Ctrl_10D_peak_3851
chr9	91043067	91043282	216	91043196	15.00	11.35453	6.54556	7.56438	GR-356_Ctrl_10D_peak_3852
chr9	91151087	91151408	322	91151256	24.00	25.33754	12.33806	21.03123	GR-356_Ctrl_10D_peak_3853
chr9	91162115	91162512	398	91162310	17.00	11.54664	6.19431	7.75095	GR-356_Ctrl_10D_peak_3854
chr9	94135262	94135584	323	94135434	28.00	30.70828	14.10800	26.26377	GR-356_Ctrl_10D_peak_3855
chr9	94139941	94140420	480	94140129	12.00	8.29870	5.31827	4.69290	GR-356_Ctrl_10D_peak_3856
chr9	94783327	94783564	238	94783442	14.00	10.30761	6.13646	6.57570	GR-356_Ctrl_10D_peak_3857
chr9	94922309	94922666	358	94922480	28.00	24.18122	10.29124	19.90537	GR-356_Ctrl_10D_peak_3858
chr9	95385400	95385602	203	95385482	13.00	11.03847	6.81076	7.26925	GR-356_Ctrl_10D_peak_3859
chr9	96612165	96612375	211	96612251	14.00	10.21939	6.08255	6.49609	GR-356_Ctrl_10D_peak_3860
chr9	96875033	96875389	357	96875231	20.00	16.01727	8.03773	12.02110	GR-356_Ctrl_10D_peak_3861
chr9	98223361	98223571	211	98223458	14.00	9.15029	5.43619	5.49398	GR-356_Ctrl_10D_peak_3862
chr9	98357132	98357359	228	98357189	11.00	7.34068	4.90917	3.80450	GR-356_Ctrl_10D_peak_3863
chr9	101400135	101400408	274	101400285	17.00	15.04171	8.28402	11.08517	GR-356_Ctrl_10D_peak_3864
chr9	103364756	103365163	408	103364956	20.00	19.07022	9.86436	14.96383	GR-356_Ctrl_10D_peak_3865
chr9	103804409	103804644	236	103804534	15.00	11.93237	6.89814	8.11718	GR-356_Ctrl_10D_peak_3866
chr9	105911637	105911858	222	105911734	13.00	12.14649	7.49111	8.31795	GR-356_Ctrl_10D_peak_3867
chr9	106892742	106893015	274	106892872	14.00	7.51297	4.48335	3.96361	GR-356_Ctrl_10D_peak_3868
chr9	106953210	106953474	265	106953337	14.00	7.95815	4.73693	4.37816	GR-356_Ctrl_10D_peak_3869
chr9	107707406	107707867	462	107707672	28.00	28.00853	12.50288	23.63149	GR-356_Ctrl_10D_peak_3870
chr9	108040756	108041107	352	108040935	47.00	58.26898	22.09072	53.29343	GR-356_Ctrl_10D_peak_3871
chr9	108049167	108049701	535	108049443	43.00	48.01141	18.00028	43.20510	GR-356_Ctrl_10D_peak_3872
chr9	108478926	108479286	361	108479134	16.00	15.40568	8.77063	11.44066	GR-356_Ctrl_10D_peak_3873
chr9	109001429	109001631	203	109001505	14.00	10.30761	6.13646	6.57570	GR-356_Ctrl_10D_peak_3874
chr9	109036063	109036468	406	109036265	28.00	26.92145	11.86382	22.56609	GR-356_Ctrl_10D_peak_3875
chr9	109114368	109114589	222	109114488	12.00	9.36569	5.98290	5.68975	GR-356_Ctrl_10D_peak_3876
chr9	109117770	109118014	245	109117874	17.00	15.61508	8.63353	11.64225	GR-356_Ctrl_10D_peak_3877
chr9	109251615	109251817	203	109251642	8.00	5.71064	4.34734	2.32928	GR-356_Ctrl_10D_peak_3878
chr9	109986809	109987019	211	109986910	20.00	9.48921	4.55431	5.80980	GR-356_Ctrl_10D_peak_3879
chr9	110027724	110027957	234	110027828	26.00	18.37072	7.73124	14.29157	GR-356_Ctrl_10D_peak_3880
chr9	110029344	110029712	369	110029519	32.00	26.77034	10.42124	22.42191	GR-356_Ctrl_10D_peak_3881
chr9	110116002	110116365	364	110116177	32.00	30.76890	12.63071	26.31952	GR-356_Ctrl_10D_peak_3882
chr9	110141279	110141655	377	110141501	22.00	14.87042	6.87446	10.92301	GR-356_Ctrl_10D_peak_3883
chr9	110748470	110748778	309	110748634	23.00	13.93699	6.17155	10.02573	GR-356_Ctrl_10D_peak_3884
chr9	110797683	110797954	272	110797800	13.00	7.11342	4.42113	3.60941	GR-356_Ctrl_10D_peak_3885
chr9	110912725	110912938	214	110912835	16.00	14.58405	8.27020	10.65006	GR-356_Ctrl_10D_peak_3886
chr9	110918494	110919029	536	110918858	28.00	22.11738	9.15806	17.90403	GR-356_Ctrl_10D_peak_3887
chr9	111348915	111349123	209	111349070	12.00	10.61446	6.75807	6.86841	GR-356_Ctrl_10D_peak_3888
chr9	111728682	111729028	347	111728865	20.00	13.43072	6.56433	9.54682	GR-356_Ctrl_10D_peak_3889
chr9	111925899	111926101	203	111926055	13.00	7.11342	4.42113	3.60941	GR-356_Ctrl_10D_peak_3890
chr9	111926513	111926925	413	111926787	20.00	17.72624	9.05381	13.66821	GR-356_Ctrl_10D_peak_3891
chr9	111965348	111965765	418	111965640	28.00	22.11738	9.15806	17.90403	GR-356_Ctrl_10D_peak_3892
chr9	112012170	112012959	790	112012771	46.00	44.26180	14.69159	39.52756	GR-356_Ctrl_10D_peak_3893
chr9	112041643	112042254	612	112041991	64.00	69.61065	20.31816	64.45104	GR-356_Ctrl_10D_peak_3894
chr9	112050673	112050879	207	112050722	16.00	10.56882	5.85018	6.82410	GR-356_Ctrl_10D_peak_3895
chr9	112065954	112066174	221	112066062	18.00	11.59671	6.00011	7.79238	GR-356_Ctrl_10D_peak_3896
chr9	112074419	112074763	345	112074576	19.00	15.66840	8.11006	11.69225	GR-356_Ctrl_10D_peak_3897
chr9	113578934	113579303	370	113579102	16.00	13.04442	7.32928	9.17460	GR-356_Ctrl_10D_peak_3898
chr9	114385478	114385749	272	114385579	15.00	11.93237	6.89814	8.11718	GR-356_Ctrl_10D_peak_3899
chr9	114446154	114446463	310	114446321	16.00	12.32642	6.89355	8.49305	GR-356_Ctrl_10D_peak_3900
chr9	114894883	114895085	203	114894978	12.00	6.29799	4.10534	2.87237	GR-356_Ctrl_10D_peak_3901
chr9	115018948	115019152	205	115019034	14.00	10.30761	6.13646	6.57570	GR-356_Ctrl_10D_peak_3902
chr9	115146524	115146840	317	115146614	15.00	11.93237	6.89814	8.11718	GR-356_Ctrl_10D_peak_3903
chr9	115167189	115167434	246	115167324	18.00	13.80571	7.27223	9.90112	GR-356_Ctrl_10D_peak_3904
chr9	115939244	115939693	450	115939561	17.00	13.52504	7.36375	9.63421	GR-356_Ctrl_10D_peak_3905
chr9	115944558	115944958	401	115944792	19.00	15.66840	8.11006	11.69225	GR-356_Ctrl_10D_peak_3906
chr9	116193668	116193877	210	116193749	14.00	10.84639	6.46701	7.08551	GR-356_Ctrl_10D_peak_3907
chr9	116288730	116289025	296	116288873	22.00	19.34005	9.40924	15.22368	GR-356_Ctrl_10D_peak_3908
chr9	117671532	117671786	255	117671692	15.00	8.83037	5.05272	5.18296	GR-356_Ctrl_10D_peak_3909
chr9	117678912	117679183	272	117679000	16.00	9.72846	5.36852	6.02673	GR-356_Ctrl_10D_peak_3910
chr9	121945919	121946169	251	121946019	17.00	10.54790	5.62657	6.80508	GR-356_Ctrl_10D_peak_3911
chr9	121963680	121964128	449	121963938	57.00	71.95129	25.00577	66.75419	GR-356_Ctrl_10D_peak_3912
chr9	124286533	124286783	251	124286674	17.00	8.69704	4.62866	5.06540	GR-356_Ctrl_10D_peak_3913
chr9	124297542	124297911	370	124297701	45.00	37.77456	11.82880	33.17066	GR-356_Ctrl_10D_peak_3914
chr9	124309747	124309973	227	124309846	17.00	13.52504	7.36375	9.63421	GR-356_Ctrl_10D_peak_3915
chr9	124818621	124819042	422	124818784	14.00	12.45251	7.45679	8.60956	GR-356_Ctrl_10D_peak_3916
chr9	125694608	125694841	234	125694696	13.00	10.44517	6.44313	6.70492	GR-356_Ctrl_10D_peak_3917
chr9	126985926	126986129	204	126985992	15.00	8.83037	5.05272	5.18296	GR-356_Ctrl_10D_peak_3918
chr9	127521273	127521605	333	127521450	17.00	14.77196	8.11967	10.82767	GR-356_Ctrl_10D_peak_3919
chr9	127524529	127524765	237	127524690	15.00	11.35453	6.54556	7.56438	GR-356_Ctrl_10D_peak_3920
chr9	127570442	127570834	393	127570549	37.00	36.13976	13.77168	31.57486	GR-356_Ctrl_10D_peak_3921
chr9	127684768	127685102	335	127684966	26.00	19.87698	8.52647	15.74164	GR-356_Ctrl_10D_peak_3922
chr9	128874519	128874819	301	128874631	31.00	32.12278	13.79629	27.64347	GR-356_Ctrl_10D_peak_3923
chr9	128911557	128911892	336	128911724	33.00	33.43903	13.78711	28.93029	GR-356_Ctrl_10D_peak_3924
chr9	130451906	130452137	232	130452062	17.00	14.18108	7.76041	10.26550	GR-356_Ctrl_10D_peak_3925
chr9	130847363	130847578	216	130847531	14.00	10.30761	6.13646	6.57570	GR-356_Ctrl_10D_peak_3926
chr9	130961878	130962085	208	130961980	16.00	12.32642	6.89355	8.49305	GR-356_Ctrl_10D_peak_3927
chr9	131678573	131678815	243	131678646	16.00	14.39375	8.15389	10.47254	GR-356_Ctrl_10D_peak_3928
chr9	131727395	131727725	331	131727596	13.00	9.78813	6.03587	6.07882	GR-356_Ctrl_10D_peak_3929
chr9	132647409	132647738	330	132647603	29.00	23.25980	9.47386	19.00767	GR-356_Ctrl_10D_peak_3930
chr9	133714939	133715141	203	133715094	10.00	6.41677	4.50007	2.96268	GR-356_Ctrl_10D_peak_3931
chr9	133874420	133874651	232	133874476	12.00	7.74386	4.97573	4.18694	GR-356_Ctrl_10D_peak_3932
chr9	134434945	134435257	313	134435127	16.00	15.94465	9.09634	11.95197	GR-356_Ctrl_10D_peak_3933
chr9	134602546	134602885	340	134602760	17.00	11.54664	6.19431	7.75095	GR-356_Ctrl_10D_peak_3934
chr9	134662130	134662477	348	134662310	17.00	12.73252	6.88948	8.87421	GR-356_Ctrl_10D_peak_3935
chr9	134670031	134670491	461	134670318	21.00	18.00353	8.92107	13.93598	GR-356_Ctrl_10D_peak_3936
chr9	137612170	137612568	399	137612370	29.00	32.51715	14.80567	28.02608	GR-356_Ctrl_10D_peak_3937
chr9_KI270717v1_random	12742	12952	211	12811	9.00	5.52982	4.09097	2.16270	GR-356_Ctrl_10D_peak_3938
chr9_KI270717v1_random	13111	13506	396	13279	19.00	17.48569	9.20447	13.43903	GR-356_Ctrl_10D_peak_3939
chrUn_GL000220v1	110023	110293	271	110169	25.00	6.83853	3.01499	3.35421	GR-356_Ctrl_10D_peak_3940
chrUn_GL000220v1	111895	112304	410	112046	23.00	10.30918	4.50010	6.57656	GR-356_Ctrl_10D_peak_3941
chrUn_GL000220v1	114998	115393	396	115356	25.00	8.17489	3.46675	4.58857	GR-356_Ctrl_10D_peak_3942
chrUn_GL000220v1	115856	116130	275	115951	23.00	10.84127	4.72843	7.08309	GR-356_Ctrl_10D_peak_3943
chrUn_GL000220v1	153278	153480	203	153321	26.00	8.79806	3.60008	5.15922	GR-356_Ctrl_10D_peak_3944
chrUn_GL000220v1	153829	154169	341	154086	29.00	9.94726	3.73267	6.23629	GR-356_Ctrl_10D_peak_3945
chrUn_GL000220v1	156316	156518	203	156446	17.00	8.21454	4.38162	4.62604	GR-356_Ctrl_10D_peak_3946
chrUn_GL000220v1	157489	157814	326	157567	20.00	10.39617	4.98730	6.65874	GR-356_Ctrl_10D_peak_3947
chrUn_GL000220v1	158591	159301	711	159052	24.00	6.72156	3.04061	3.24721	GR-356_Ctrl_10D_peak_3948
chrUn_GL000220v1	159804	160043	240	159955	23.00	5.47887	2.68329	2.13462	GR-356_Ctrl_10D_peak_3949
chrUn_GL000220v1	160976	161386	411	161213	23.00	9.36929	4.11097	5.69335	GR-356_Ctrl_10D_peak_3950
chrUn_KI270438v1	109912	110338	427	109923	167.00	5.55002	1.44141	2.18270	GR-356_Ctrl_10D_peak_3951
chrX	2352000	2352260	261	2352108	15.00	12.69114	7.36357	8.83583	GR-356_Ctrl_10D_peak_3952
chrX	2707414	2707616	203	2707465	11.00	9.70041	6.38419	6.00564	GR-356_Ctrl_10D_peak_3953
chrX	13398482	13398696	215	13398609	18.00	18.50580	10.10830	14.42476	GR-356_Ctrl_10D_peak_3954
chrX	17032343	17032640	298	17032490	19.00	19.96593	10.70158	15.82610	GR-356_Ctrl_10D_peak_3955
chrX	18873153	18873443	291	18873291	19.00	19.96593	10.70158	15.82610	GR-356_Ctrl_10D_peak_3956
chrX	19019975	19020245	271	19020162	12.00	10.93743	6.95603	7.17142	GR-356_Ctrl_10D_peak_3957
chrX	19710218	19710425	208	19710336	17.00	17.17031	9.57629	13.13346	GR-356_Ctrl_10D_peak_3958
chrX	37361622	37361857	236	37361767	20.00	13.55309	6.63170	9.65682	GR-356_Ctrl_10D_peak_3959
chrX	37405957	37406303	347	37406136	23.00	25.49584	12.76838	21.18439	GR-356_Ctrl_10D_peak_3960
chrX	39762363	39762572	210	39762452	12.00	10.06080	6.41579	6.34686	GR-356_Ctrl_10D_peak_3961
chrX	39894678	39894928	251	39894763	21.00	18.13681	9.00014	14.06386	GR-356_Ctrl_10D_peak_3962
chrX	39908088	39908542	455	39908456	23.00	16.63569	7.57908	12.62046	GR-356_Ctrl_10D_peak_3963
chrX	40845545	40845893	349	40845617	14.00	7.95815	4.73693	4.37816	GR-356_Ctrl_10D_peak_3964
chrX	41381594	41382023	430	41381795	74.00	105.92992	35.22986	100.29315	GR-356_Ctrl_10D_peak_3965
chrX	41406245	41406600	356	41406442	16.00	12.42749	6.95465	8.58616	GR-356_Ctrl_10D_peak_3966
chrX	43703330	43703667	338	43703506	21.00	22.64114	11.70435	18.41603	GR-356_Ctrl_10D_peak_3967
chrX	45479253	45479479	227	45479340	15.00	11.35453	6.54556	7.56438	GR-356_Ctrl_10D_peak_3968
chrX	45669111	45669399	289	45669240	12.00	10.93743	6.95603	7.17142	GR-356_Ctrl_10D_peak_3969
chrX	45710037	45710240	204	45710153	12.00	9.36569	5.98290	5.68975	GR-356_Ctrl_10D_peak_3970
chrX	45710405	45710818	414	45710578	20.00	21.35004	11.23666	17.16300	GR-356_Ctrl_10D_peak_3971
chrX	45715965	45716172	208	45716050	13.00	7.11342	4.42113	3.60941	GR-356_Ctrl_10D_peak_3972
chrX	45758316	45758561	246	45758483	13.00	9.28838	5.72736	5.61672	GR-356_Ctrl_10D_peak_3973
chrX	45788407	45788667	261	45788515	20.00	16.95276	8.59104	12.92164	GR-356_Ctrl_10D_peak_3974
chrX	45824515	45824760	246	45824592	20.00	13.55309	6.63170	9.65682	GR-356_Ctrl_10D_peak_3975
chrX	46325480	46325815	336	46325593	11.00	9.70041	6.38419	6.00564	GR-356_Ctrl_10D_peak_3976
chrX	46327676	46327885	210	46327783	16.00	11.68258	6.50673	7.87434	GR-356_Ctrl_10D_peak_3977
chrX	48487250	48487763	514	48487448	28.00	32.93076	15.42846	28.43197	GR-356_Ctrl_10D_peak_3978
chrX	48498480	48498805	326	48498669	12.00	10.93743	6.95603	7.17142	GR-356_Ctrl_10D_peak_3979
chrX	48591372	48591695	324	48591513	36.00	45.76448	19.79792	41.00108	GR-356_Ctrl_10D_peak_3980
chrX	53071618	53071990	373	53071797	34.00	42.51733	18.72777	37.81653	GR-356_Ctrl_10D_peak_3981
chrX	72620544	72620927	384	72620729	36.00	45.76448	19.79792	41.00108	GR-356_Ctrl_10D_peak_3982
chrX	77451202	77451404	203	77451262	12.00	10.93743	6.95603	7.17142	GR-356_Ctrl_10D_peak_3983
chrX	85052644	85052990	347	85052807	19.00	19.96593	10.70158	15.82610	GR-356_Ctrl_10D_peak_3984
chrX	87409420	87409696	277	87409558	19.00	19.96593	10.70158	15.82610	GR-356_Ctrl_10D_peak_3985
chrX	87516638	87516975	338	87516794	18.00	11.59671	6.00011	7.79238	GR-356_Ctrl_10D_peak_3986
chrX	105483091	105483354	264	105483222	22.00	19.34005	9.40924	15.22368	GR-356_Ctrl_10D_peak_3987
chrX	107674094	107674296	203	107674193	11.00	9.76027	6.42095	6.05470	GR-356_Ctrl_10D_peak_3988
chrX	107677057	107677432	376	107677217	46.00	52.52131	19.22758	47.63863	GR-356_Ctrl_10D_peak_3989
chrX	107700404	107700606	203	107700464	13.00	12.14649	7.49111	8.31795	GR-356_Ctrl_10D_peak_3990
chrX	107710847	107711297	451	107711174	19.00	15.66840	8.11006	11.69225	GR-356_Ctrl_10D_peak_3991
chrX	107741849	107742068	220	107741940	11.00	9.76027	6.42095	6.05470	GR-356_Ctrl_10D_peak_3992
chrX	108399425	108399690	266	108399538	11.00	8.95550	5.92227	5.30388	GR-356_Ctrl_10D_peak_3993
chrX	110081756	110082036	281	110081872	14.00	13.30945	7.98024	9.43483	GR-356_Ctrl_10D_peak_3994
chrX	110082208	110082519	312	110082348	22.00	24.17774	12.30682	19.90195	GR-356_Ctrl_10D_peak_3995
chrX	110087011	110087717	707	110087559	15.00	14.65187	8.56126	10.70843	GR-356_Ctrl_10D_peak_3996
chrX	110383537	110383739	203	110383597	14.00	13.30945	7.98024	9.43483	GR-356_Ctrl_10D_peak_3997
chrX	110394553	110394836	284	110394669	12.00	10.06080	6.41579	6.34686	GR-356_Ctrl_10D_peak_3998
chrX	134512641	134512906	266	134512774	24.00	27.07922	13.37698	22.72005	GR-356_Ctrl_10D_peak_3999
chrX	136130896	136131435	540	136131278	25.00	28.55578	13.91205	24.15788	GR-356_Ctrl_10D_peak_4000
chrX	136214573	136214993	421	136214801	25.00	28.42130	13.83241	24.02906	GR-356_Ctrl_10D_peak_4001
chrX	136220530	136220732	203	136220564	11.00	9.76027	6.42095	6.05470	GR-356_Ctrl_10D_peak_4002
chrX	139739152	139739381	230	139739280	17.00	17.17031	9.57629	13.13346	GR-356_Ctrl_10D_peak_4003
chrX	140157748	140157950	203	140157807	14.00	10.30761	6.13646	6.57570	GR-356_Ctrl_10D_peak_4004
chrX	140180726	140181008	283	140180856	19.00	15.78879	8.18195	11.80509	GR-356_Ctrl_10D_peak_4005
chrX	141439931	141440133	203	141440033	11.00	9.70041	6.38419	6.00564	GR-356_Ctrl_10D_peak_4006
chrX	148871461	148871702	242	148871597	16.00	12.32642	6.89355	8.49305	GR-356_Ctrl_10D_peak_4007
chrX	149248254	149248617	364	149248416	38.00	34.99907	12.77641	30.45558	GR-356_Ctrl_10D_peak_4008
chrX	150205068	150205301	234	150205151	15.00	13.46672	7.83964	9.58161	GR-356_Ctrl_10D_peak_4009
chrX	151871293	151871624	332	151871457	29.00	26.87443	11.48246	22.52304	GR-356_Ctrl_10D_peak_4010
chrX	153689179	153689394	216	153689350	11.00	9.76027	6.42095	6.05470	GR-356_Ctrl_10D_peak_4011
chrX	154042934	154043324	391	154043108	15.00	13.28563	7.72860	9.41221	GR-356_Ctrl_10D_peak_4012
chrX	154732816	154733018	203	154732902	10.00	6.39642	4.48721	2.95423	GR-356_Ctrl_10D_peak_4013
chrX	154735683	154736071	389	154735896	31.00	30.91800	13.09111	26.46207	GR-356_Ctrl_10D_peak_4014
chrX	155027225	155027480	256	155027350	12.00	9.77058	6.23533	6.06461	GR-356_Ctrl_10D_peak_4015
chrY	7461979	7462181	203	7462091	10.00	8.61749	5.88587	4.99608	GR-356_Ctrl_10D_peak_4016
chrY	7468184	7468386	203	7468225	10.00	8.61749	5.88587	4.99608	GR-356_Ctrl_10D_peak_4017
chrY	12555110	12555421	312	12555239	18.00	18.60293	10.16650	14.51703	GR-356_Ctrl_10D_peak_4018
chrY	12651658	12651998	341	12651858	10.00	7.88452	5.42875	4.31631	GR-356_Ctrl_10D_peak_4019
chrY	24026281	24026518	238	24026371	14.00	13.30945	7.98024	9.43483	GR-356_Ctrl_10D_peak_4020
chrY	24270542	24271013	472	24270728	22.00	24.17774	12.30682	19.90195	GR-356_Ctrl_10D_peak_4021
chrY	25399242	25399521	280	25399352	23.00	20.56168	9.81834	16.40304	GR-356_Ctrl_10D_peak_4022
chrY	25643647	25643889	243	25643748	16.00	12.42749	6.95465	8.58616	GR-356_Ctrl_10D_peak_4023
