# Supplementary material for: Nascent transcript analysis of glucocorticoid crosstalk with TNF defines primary and cooperative inflammatory repression
Source: HighWire-hosted journal article supplement (doi:10.1101/gr.248187.119), 2019-09-13
Supplement: Supplemental_File_S4.zip [file GR-356_Ctrl_10V_peaks.xls]

# This file is generated by MACS version 2.1.1.20160309
# Command line: callpeak -c /scratch/Shares/dowell/Sasse/Sasse2019/10minChIPseq/mapped/bams/GR-356_Ctrl_INPUT1.sorted.bam /scratch/Shares/dowell/Sasse/Sasse2019/10minChIPseq/mapped/bams/GR-356_Ctrl_INPUT1.sorted.bam -t /scratch/Shares/dowell/Sasse/Sasse2019/10minChIPseq/mapped/bams/GR-356_Ctrl_10V1.sorted.bam /scratch/Shares/dowell/Sasse/Sasse2019/10minChIPseq/mapped/bams/GR-356_Ctrl_10V2.sorted.bam --outdir /scratch/Shares/dowell/Sasse/Sasse2019/10minChIPseq/macs2 -n GR-356_Ctrl_10V -g hs --SPMR
# ARGUMENTS LIST:
# name = GR-356_Ctrl_10V
# format = AUTO
# ChIP-seq file = ['/scratch/Shares/dowell/Sasse/Sasse2019/10minChIPseq/mapped/bams/GR-356_Ctrl_10V1.sorted.bam', '/scratch/Shares/dowell/Sasse/Sasse2019/10minChIPseq/mapped/bams/GR-356_Ctrl_10V2.sorted.bam']
# control file = ['/scratch/Shares/dowell/Sasse/Sasse2019/10minChIPseq/mapped/bams/GR-356_Ctrl_INPUT1.sorted.bam', '/scratch/Shares/dowell/Sasse/Sasse2019/10minChIPseq/mapped/bams/GR-356_Ctrl_INPUT1.sorted.bam']
# effective genome size = 2.70e+09
# band width = 300
# model fold = [5, 50]
# qvalue cutoff = 5.00e-02
# Larger dataset will be scaled towards smaller dataset.
# Range for calculating regional lambda is: 1000 bps and 10000 bps
# Broad region calling is off
# Paired-End mode is off

# tag size is determined as 76 bps
# total tags in treatment: 11904346
# tags after filtering in treatment: 6934794
# maximum duplicate tags at the same position in treatment = 1
# Redundant rate in treatment: 0.42
# total tags in control: 38973416
# tags after filtering in control: 16001830
# maximum duplicate tags at the same position in control = 1
# Redundant rate in control: 0.59
# d = 75
# alternative fragment length(s) may be 75,189,267 bps
chr	start	end	length	abs_summit	pileup	-log10(pvalue)	fold_enrichment	-log10(qvalue)	name
chr1	16896026	16896100	75	16896081	10.00	9.91689	6.66641	4.27198	GR-356_Ctrl_10V_peak_1
chr1	125178873	125179004	132	125178988	81.00	11.22545	2.29885	5.40056	GR-356_Ctrl_10V_peak_2
chr1	125179187	125179433	247	125179299	114.00	12.33813	2.08440	6.34337	GR-356_Ctrl_10V_peak_3
chr1	125179642	125179905	264	125179784	115.00	10.83622	1.96370	5.06887	GR-356_Ctrl_10V_peak_4
chr1	125180107	125180441	335	125180173	147.00	20.10916	2.36651	13.06828	GR-356_Ctrl_10V_peak_5
chr1	125180555	125180689	135	125180587	99.00	10.78540	2.07306	5.02319	GR-356_Ctrl_10V_peak_6
chr1	125182284	125182663	380	125182588	121.00	12.11897	2.02079	6.15689	GR-356_Ctrl_10V_peak_7
chr1	125182964	125183103	140	125182999	112.00	15.70516	2.36379	9.24625	GR-356_Ctrl_10V_peak_8
chr1	143192709	143192862	154	143192809	79.00	9.74920	2.16391	4.13284	GR-356_Ctrl_10V_peak_9
chr1	143206104	143206192	89	143206162	82.00	11.08700	2.27169	5.28108	GR-356_Ctrl_10V_peak_10
chr1	143212478	143212582	105	143212528	84.00	6.95630	1.82778	1.79180	GR-356_Ctrl_10V_peak_11
chr1	143213215	143213337	123	143213229	69.00	10.05728	2.33053	4.39693	GR-356_Ctrl_10V_peak_12
chr1	143214648	143214923	276	143214768	96.00	8.65996	1.90802	3.20273	GR-356_Ctrl_10V_peak_13
chr1	143215689	143215831	143	143215787	78.00	9.86650	2.18816	4.23391	GR-356_Ctrl_10V_peak_14
chr1	143230287	143230436	150	143230311	102.00	11.57521	2.11624	5.69611	GR-356_Ctrl_10V_peak_15
chr1	143249795	143249872	78	143249823	102.00	13.72799	2.30060	7.53000	GR-356_Ctrl_10V_peak_16
chr1	143251622	143251723	102	143251665	117.00	17.11903	2.42443	10.46549	GR-356_Ctrl_10V_peak_17
chr1	143251935	143252053	119	143251946	97.00	9.52924	1.97828	3.93859	GR-356_Ctrl_10V_peak_18
chr1	143252980	143253145	166	143253022	108.00	14.18645	2.28012	7.91778	GR-356_Ctrl_10V_peak_19
chr1	143253753	143253865	113	143253767	84.00	9.88569	2.12480	4.24562	GR-356_Ctrl_10V_peak_20
chr1	143254449	143254647	199	143254497	123.00	15.47169	2.24752	9.04577	GR-356_Ctrl_10V_peak_21
chr1	143254764	143254938	175	143254866	121.00	11.33536	1.96439	5.49492	GR-356_Ctrl_10V_peak_22
chr1	143255855	143256009	155	143255884	101.00	20.92399	2.96771	13.80577	GR-356_Ctrl_10V_peak_23
chr1	143256416	143256531	116	143256452	117.00	15.25640	2.28218	8.86044	GR-356_Ctrl_10V_peak_24
chr1	143256801	143256915	115	143256826	98.00	14.60193	2.42228	8.28544	GR-356_Ctrl_10V_peak_25
chr1	143262332	143262418	87	143262366	92.00	12.79887	2.32478	6.74119	GR-356_Ctrl_10V_peak_26
chr1	143264620	143264707	88	143264672	100.00	9.87740	1.98670	4.24015	GR-356_Ctrl_10V_peak_27
chr11	1219298	1219456	159	1219323	6.00	8.78242	5.86937	3.29406	GR-356_Ctrl_10V_peak_28
chr11	1219685	1220031	347	1219803	8.00	12.07241	7.54633	6.11569	GR-356_Ctrl_10V_peak_29
chr11	1220119	1220315	197	1220243	16.00	26.78963	14.25417	18.55377	GR-356_Ctrl_10V_peak_30
chr11	1220658	1220780	123	1220660	6.00	6.40856	4.88358	1.34942	GR-356_Ctrl_10V_peak_31
chr11	1222466	1222540	75	1222518	7.00	9.83706	6.51720	4.20710	GR-356_Ctrl_10V_peak_32
chr11	1226187	1226508	322	1226455	9.00	13.78845	8.38481	7.56870	GR-356_Ctrl_10V_peak_33
chr14	94599154	94599685	532	94599623	9.00	13.14049	8.16812	7.02630	GR-356_Ctrl_10V_peak_34
chr16	34592709	34592826	118	34592737	77.00	10.74768	2.29841	4.98902	GR-356_Ctrl_10V_peak_35
chr16	46388651	46388773	123	46388676	95.00	9.69323	2.00818	4.08243	GR-356_Ctrl_10V_peak_36
chr16	46399491	46399566	76	46399527	98.00	11.32426	2.12883	5.48673	GR-356_Ctrl_10V_peak_37
chr16	46400043	46400147	105	46400133	101.00	9.04760	1.90874	3.51656	GR-356_Ctrl_10V_peak_38
chr17	19188065	19188144	80	19188107	12.00	10.95045	6.96397	5.16638	GR-356_Ctrl_10V_peak_39
chr19	8355617	8355913	297	8355691	9.00	7.52186	5.35690	2.21545	GR-356_Ctrl_10V_peak_40
chr2	112811282	112811365	84	112811327	11.00	15.20350	9.28413	8.81480	GR-356_Ctrl_10V_peak_41
chr21	8218459	8218556	98	8218524	15.00	11.27477	6.49709	5.44222	GR-356_Ctrl_10V_peak_42
chr21	8445667	8445812	146	8445762	14.00	11.91444	7.12553	5.98772	GR-356_Ctrl_10V_peak_43
chr3	93470397	93470773	377	93470719	146.00	26.03339	2.75083	18.17572	GR-356_Ctrl_10V_peak_44
chr5	49612392	49612496	105	49612396	58.00	6.78346	2.05317	1.65879	GR-356_Ctrl_10V_peak_45
chr6	137873393	137873790	398	137873702	14.00	17.73985	10.46481	10.98987	GR-356_Ctrl_10V_peak_46
chr6	137873960	137874063	104	137874019	9.00	12.67432	7.99825	6.63365	GR-356_Ctrl_10V_peak_47
chrUn_KI270303v1	1288	1363	76	1298	62.00	9.49695	2.37117	3.91043	GR-356_Ctrl_10V_peak_48
chrUn_KI270310v1	848	955	108	883	113.00	13.80033	2.20482	7.57917	GR-356_Ctrl_10V_peak_49
chrUn_KI270438v1	103929	104119	191	103963	61.00	12.63710	2.84378	6.60340	GR-356_Ctrl_10V_peak_50
chrUn_KI270438v1	104275	104360	86	104312	69.00	15.00016	2.97423	8.63710	GR-356_Ctrl_10V_peak_51
chrUn_KI270438v1	110169	110321	153	110228	55.00	11.47489	2.82553	5.61449	GR-356_Ctrl_10V_peak_52
chrUn_KI270438v1	110402	110545	144	110494	69.00	15.82363	3.08795	9.34870	GR-356_Ctrl_10V_peak_53
chrUn_KI270438v1	111259	111417	159	111308	48.00	8.74955	2.55185	3.28241	GR-356_Ctrl_10V_peak_54
chrUn_KI270544v1	1028	1112	85	1058	85.00	20.27496	3.23684	13.21358	GR-356_Ctrl_10V_peak_55
