# Supplementary material for: Nascent transcript analysis of glucocorticoid crosstalk with TNF defines primary and cooperative inflammatory repression
Source: HighWire-hosted journal article supplement (doi:10.1101/gr.248187.119), 2019-09-13
Supplement: Supplemental_Table_S1.xlsx [file Supplemental_Table_S1.xlsx]

## Sheet: Gene Ontology
Supplementary Table S1. Overrepresented ontology terms from DAVID GO Analysis for differentially transcribed genes clustered by GR/NFKB transcriptional regulatory crosstalk pattern. Annotation cluster enrichment scores > 1 are considered significant.
Cluster 1: TNF+dex cooperatively induced
Annotation Cluster 1	Enrichment Score: 3.9417438113198218
Category	Term	Count	%	PValue	Genes	List Total	Pop Hits	Pop Total	Fold Enrichment	Bonferroni	Benjamini	FDR
GOTERM_BP_DIRECT	GO:0006953~acute-phase response	5	4.54545	4.39345e-05	SAA2-SAA4, SAA2, SAA1, SERPINA3, SERPINA1	86	39	16792	25.0328	0.0349195	0.0349195	0.0675174
INTERPRO	IPR000096:Serum amyloid A protein	3	2.72727	0.000148079	SAA2-SAA4, SAA2, SAA1	94	4	18559	148.077	0.0366308	0.0366308	0.192438
SMART	SM00197:SAA	3	2.72727	0.000229864	SAA2-SAA4, SAA2, SAA1	64	4	10057	117.855	0.0177716	0.0177716	0.242878
Annotation Cluster 2	Enrichment Score: 1.532689850762732
Category	Term	Count	%	PValue	Genes	List Total	Pop Hits	Pop Total	Fold Enrichment	Bonferroni	Benjamini	FDR
INTERPRO	IPR023795:Protease inhibitor I4, serpin, conserved site	3	2.72727	0.0118571	SERPINA5, SERPINA3, SERPINA1	94	33	18559	17.9487	0.950504	0.777522	14.3714
INTERPRO	IPR000215:Serpin family	3	2.72727	0.0155338	SERPINA5, SERPINA3, SERPINA1	94	38	18559	15.5871	0.980654	0.731548	18.4243
INTERPRO	IPR023796:Serpin domain	3	2.72727	0.0155338	SERPINA5, SERPINA3, SERPINA1	94	38	18559	15.5871	0.980654	0.731548	18.4243
UP_SEQ_FEATURE	site:Reactive bond	3	2.72727	0.0188675	SERPINA5, SERPINA3, SERPINA1	95	45	20063	14.0793	0.999224	0.972152	23.1478
SMART	SM00093:SERPIN	3	2.72727	0.0223446	SERPINA5, SERPINA3, SERPINA1	64	37	10057	12.7411	0.82841	0.585766	21.2615
GOTERM_BP_DIRECT	GO:0010951~negative regulation of endopeptidase activity	4	3.63636	0.0235032	C3, SERPINA5, SERPINA3, SERPINA1	86	121	16792	6.45474	1	0.882098	30.6233
UP_KEYWORDS	Serine protease inhibitor	3	2.72727	0.0600275	SERPINA5, SERPINA3, SERPINA1	96	86	20581	7.47856	0.999993	0.947971	53.7014
GOTERM_MF_DIRECT	GO:0004867~serine-type endopeptidase inhibitor activity	3	2.72727	0.0841598	SERPINA5, SERPINA3, SERPINA1	85	97	16881	6.14227	1	0.980178	67.4217
UP_KEYWORDS	Protease inhibitor	3	2.72727	0.112146	SERPINA5, SERPINA3, SERPINA1	96	124	20581	5.18674	1	0.896884	77.228
Annotation Cluster 3	Enrichment Score: 1.1864480360883112
Category	Term	Count	%	PValue	Genes	List Total	Pop Hits	Pop Total	Fold Enrichment	Bonferroni	Benjamini	FDR
KEGG_PATHWAY	hsa05140:Leishmaniasis	3	2.72727	0.0550394	C3, TLR2, JAK1	38	71	6910	7.68347	0.994529	0.823794	46.1236
KEGG_PATHWAY	hsa05152:Tuberculosis	4	3.63636	0.068051	CIITA, C3, TLR2, JAK1	38	177	6910	4.10943	0.998472	0.802294	53.6965
KEGG_PATHWAY	hsa05168:Herpes simplex infection	4	3.63636	0.0736457	C3, TAP1, TLR2, JAK1	38	183	6910	3.97469	0.999122	0.755263	56.6444
Annotation Cluster 4	Enrichment Score: 1.1038052944355652
Category	Term	Count	%	PValue	Genes	List Total	Pop Hits	Pop Total	Fold Enrichment	Bonferroni	Benjamini	FDR
UP_SEQ_FEATURE	DNA-binding region:Fork-head	3	2.72727	0.022997	FOXL1, FOXC2, FOXP4	95	50	20063	12.6714	0.999841	0.945848	27.5002
INTERPRO	IPR001766:Transcription factor, fork head	3	2.72727	0.0250801	FOXL1, FOXC2, FOXP4	94	49	18559	12.0879	0.99834	0.798144	28.1352
SMART	SM00339:FH	3	2.72727	0.0376155	FOXL1, FOXC2, FOXP4	64	49	10057	9.62085	0.949743	0.630968	33.34
INTERPRO	IPR011991:Winged helix-turn-helix DNA-binding domain	4	3.63636	0.114116	FOXL1, FOXC2, FOXP4, HFM1	94	235	18559	3.36062	1	0.993837	79.3217
GOTERM_MF_DIRECT	GO:0003700~transcription factor activity, sequence-specific DNA binding	8	7.27273	0.201154	ZFP36L1, FOXL1, TSC22D2, FOXC2, MXD1, SOX9, FOXP4, PLAGL2	85	961	16881	1.65328	1	0.998089	94.3022
GOTERM_MF_DIRECT	GO:0043565~sequence-specific DNA binding	4	3.63636	0.478545	FOXL1, FOXC2, FOXP4, PLAGL2	85	518	16881	1.53359	1	0.99952	99.9753
Annotation Cluster 5	Enrichment Score: 1.050685050939866
Category	Term	Count	%	PValue	Genes	List Total	Pop Hits	Pop Total	Fold Enrichment	Bonferroni	Benjamini	FDR
KEGG_PATHWAY	hsa04145:Phagosome	4	3.63636	0.0477957	C3, ITGAV, TAP1, TLR2	38	153	6910	4.75404	0.988955	0.988955	41.4361
KEGG_PATHWAY	hsa05168:Herpes simplex infection	4	3.63636	0.0736457	C3, TAP1, TLR2, JAK1	38	183	6910	3.97469	0.999122	0.755263	56.6444
UP_KEYWORDS	Immunity	5	4.54545	0.200174	ALCAM, C3, TAP1, TLR2, PSMB8	96	500	20581	2.14385	1	0.918694	93.7867
Annotation Cluster 6	Enrichment Score: 0.8782810847407194
Category	Term	Count	%	PValue	Genes	List Total	Pop Hits	Pop Total	Fold Enrichment	Bonferroni	Benjamini	FDR
GOTERM_CC_DIRECT	GO:0005615~extracellular space	12	10.9091	0.0632448	SAA2, SAA1, C3, EDN2, SERPINA5, PRSS57, SERPINA3, FSTL3, PLA2G6, SERPINA1, LOX, EBI3	90	1347	18224	1.80391	0.999923	0.906363	53.9577
UP_SEQ_FEATURE	signal peptide	22	20	0.0937229	PLXNC1, CNDP1, C3, TRABD2A, PRSS57, EDN2, TLR2, FSTL3, BTN2A2, SLAMF8, ART4, ALCAM, EDNRA, TNFRSF10C, SAA2, SAA1, ITGAV, SERPINA5, SERPINA3, SERPINA1, LOX, EBI3	95	3346	20063	1.38857	1	0.994938	74.3408
UP_KEYWORDS	Signal	25	22.7273	0.136372	PLXNC1, CNDP1, C3, EDN2, FSTL3, TLR2, BTN2A2, TSPAN9, ART4, ALCAM, EDNRA, IRAK3, SAA2-SAA4, SAA2, SAA1, ITGAV, SERPINA5, SERPINA3, SERPINA1, LOX, EBI3, PRSS57, TRABD2A, SLAMF8, TNFRSF10C	96	4160	20581	1.28837	1	0.921585	83.8586
UP_KEYWORDS	Secreted	13	11.8182	0.193596	ALCAM, CNDP1, SAA2, SAA1, C3, PRSS57, EDN2, SERPINA5, FSTL3, SERPINA3, SERPINA1, LOX, EBI3	96	1965	20581	1.41833	1	0.923357	93.1203
GOTERM_CC_DIRECT	GO:0005576~extracellular region	11	10	0.259478	SAA2-SAA4, CNDP1, SAA1, C3, EDN2, SERPINA5, SERPINA3, FSTL3, SERPINA1, LOX, EBI3	90	1610	18224	1.38346	1	0.998016	97.1738
Annotation Cluster 7	Enrichment Score: 0.8373142941018842
Category	Term	Count	%	PValue	Genes	List Total	Pop Hits	Pop Total	Fold Enrichment	Bonferroni	Benjamini	FDR
KEGG_PATHWAY	hsa05152:Tuberculosis	4	3.63636	0.068051	CIITA, C3, TLR2, JAK1	38	177	6910	4.10943	0.998472	0.802294	53.6965
GOTERM_BP_DIRECT	GO:0006954~inflammatory response	5	4.54545	0.125837	CIITA, TNFRSF10C, C3, SERPINA3, TLR2	86	379	16792	2.57593	1	0.994378	87.3491
GOTERM_BP_DIRECT	GO:0006955~immune response	4	3.63636	0.359263	CIITA, TNFRSF10C, C3, TLR2	86	421	16792	1.85516	1	0.999982	99.8933
Annotation Cluster 8	Enrichment Score: 0.7888462592330057
Category	Term	Count	%	PValue	Genes	List Total	Pop Hits	Pop Total	Fold Enrichment	Bonferroni	Benjamini	FDR
UP_SEQ_FEATURE	domain:PDZ	3	2.72727	0.0984911	PDLIM4, CNKSR3, SYNPO2	95	113	20063	5.6068	1	0.986855	76.1452
INTERPRO	IPR001478:PDZ domain	3	2.72727	0.182315	PDLIM4, CNKSR3, SYNPO2	94	155	18559	3.82135	1	0.993731	92.7056
SMART	SM00228:PDZ	3	2.72727	0.239465	PDLIM4, CNKSR3, SYNPO2	64	149	10057	3.16391	1	0.986022	94.4729
Annotation Cluster 9	Enrichment Score: 0.7378339910428352
Category	Term	Count	%	PValue	Genes	List Total	Pop Hits	Pop Total	Fold Enrichment	Bonferroni	Benjamini	FDR
UP_SEQ_FEATURE	domain:PH	4	3.63636	0.107887	MCF2L2, GAB3, ASAP2, CYTH4	95	245	20063	3.44799	1	0.986329	79.3613
INTERPRO	IPR001849:Pleckstrin homology domain	4	3.63636	0.154922	MCF2L2, GAB3, ASAP2, CYTH4	94	271	18559	2.91419	1	0.99502	88.8023
INTERPRO	IPR011993:Pleckstrin homology-like domain	5	4.54545	0.166554	MCF2L2, GAB3, ASAP2, CYTH4, JAK1	94	427	18559	2.3119	1	0.993911	90.6495
SMART	SM00233:PH	4	3.63636	0.229085	MCF2L2, GAB3, ASAP2, CYTH4	64	264	10057	2.38092	1	0.993739	93.6206
GOTERM_BP_DIRECT	GO:0043547~positive regulation of GTPase activity	5	4.54545	0.320772	MCF2L2, ASAP2, CYTH4, JAK1, DENND3	86	565	16792	1.72793	1	0.999943	99.7384
Annotation Cluster 10	Enrichment Score: 0.7274937106841132
Category	Term	Count	%	PValue	Genes	List Total	Pop Hits	Pop Total	Fold Enrichment	Bonferroni	Benjamini	FDR
GOTERM_CC_DIRECT	GO:0005887~integral component of plasma membrane	14	12.7273	0.0196084	CAV1, PLXNC1, SLC5A1, TRABD2A, TLR2, TSPAN9, EDNRA, ALCAM, SSTR2, TNFRSF10C, ATP2B4, ITGAV, TAP1, SLCO5A1	90	1415	18224	2.00342	0.943384	0.616016	20.9505
UP_SEQ_FEATURE	glycosylation site:N-linked (GlcNAc...)	29	26.3636	0.0296197	PLXNC1, CNDP1, PANX1, C3, SLC5A1, TLR2, FSTL3, BTN2A2, TMEM156, TSPAN9, EXTL1, ART4, EDNRA, ALCAM, B3GNT5, ITGAV, SERPINA5, SERPINA3, STRA6, SERPINA1, GLP2R, LOX, SLCO5A1, EBI3, TRABD2A, PRSS57, RXFP2, SLAMF8, SSTR2	95	4234	20063	1.4465	0.999988	0.94077	34.0057
UP_KEYWORDS	Glycoprotein	30	27.2727	0.0351156	PLXNC1, CNDP1, PANX1, C3, SLC5A1, TLR2, FSTL3, BTN2A2, TMEM156, TSPAN9, EXTL1, ART4, EDNRA, ALCAM, B3GNT5, ITGAV, SERPINA5, SERPINA3, STRA6, SERPINA1, GLP2R, LOX, SLCO5A1, EBI3, TRABD2A, PRSS57, RXFP2, SLAMF8, TNFRSF10C, SSTR2	96	4551	20581	1.41322	0.998917	0.897295	35.8965
UP_SEQ_FEATURE	signal peptide	22	20	0.0937229	PLXNC1, CNDP1, C3, TRABD2A, PRSS57, EDN2, TLR2, FSTL3, BTN2A2, SLAMF8, ART4, ALCAM, EDNRA, TNFRSF10C, SAA2, SAA1, ITGAV, SERPINA5, SERPINA3, SERPINA1, LOX, EBI3	95	3346	20063	1.38857	1	0.994938	74.3408
UP_SEQ_FEATURE	topological domain:Cytoplasmic	22	20	0.120888	PLXNC1, CAV1, PANX1, SLC5A1, TRABD2A, RXFP2, STOML1, TLR2, BTN2A2, TMEM156, SLAMF8, TSPAN9, EXTL1, ALCAM, EDNRA, SSTR2, ATP2B4, B3GNT5, ITGAV, TAP1, STRA6, GLP2R	95	3456	20063	1.34438	1	0.987773	83.1517
UP_KEYWORDS	Signal	25	22.7273	0.136372	PLXNC1, CNDP1, C3, EDN2, FSTL3, TLR2, BTN2A2, TSPAN9, ART4, ALCAM, EDNRA, IRAK3, SAA2-SAA4, SAA2, SAA1, ITGAV, SERPINA5, SERPINA3, SERPINA1, LOX, EBI3, PRSS57, TRABD2A, SLAMF8, TNFRSF10C	96	4160	20581	1.28837	1	0.921585	83.8586
UP_SEQ_FEATURE	topological domain:Extracellular	17	15.4545	0.22755	PLXNC1, PANX1, SLC5A1, TRABD2A, RXFP2, TLR2, BTN2A2, TMEM156, SLAMF8, TSPAN9, ALCAM, EDNRA, SSTR2, ATP2B4, ITGAV, STRA6, GLP2R	95	2787	20063	1.2882	1	0.999026	97.181
UP_KEYWORDS	Disulfide bond	20	18.1818	0.228173	PLXNC1, C3, SLC5A1, EDN2, PRSS57, RXFP2, TLR2, FSTL3, BTN2A2, SLAMF8, EXTL1, ART4, ALCAM, EDNRA, TNFRSF10C, SSTR2, ITGAV, LOX, GLP2R, SLCO5A1	96	3434	20581	1.2486	1	0.935958	96.0114
UP_KEYWORDS	Cell membrane	18	16.3636	0.291698	CAV1, PANX1, TRABD2A, RXFP2, ASAP2, CYTH4, ART4, ALCAM, EDNRA, TNFRSF10C, SSTR2, CHIC2, ATP2B4, DSP, STRA6, GLP2R, DCUN1D3, SLCO5A1	96	3175	20581	1.21541	1	0.935733	98.6297
GOTERM_CC_DIRECT	GO:0005886~plasma membrane	23	20.9091	0.356056	PLXNC1, CAV1, PANX1, C3, SLC5A1, RXFP2, ASAP2, TLR2, CYTH4, TSPAN9, ART4, EDNRA, TNFRSF10C, SSTR2, CHIC2, ATP2B4, ITGAV, DSP, STRA6, GLP2R, DCUN1D3, EBI3, TES	90	4121	18224	1.13012	1	0.996978	99.4621
UP_KEYWORDS	Transmembrane helix	29	26.3636	0.359607	PLXNC1, CAV1, PANX1, SGPP2, SLC5A1, STOML1, TLR2, BTN2A2, TMEM156, TSPAN9, EXTL1, ART4, EDNRA, ALCAM, ATP2B4, B3GNT5, GAB3, ITGAV, TAP1, STRA6, TGM4, GLP2R, SLCO5A1, TRABD2A, RXFP2, SLAMF8, TNFRSF10C, SSTR2, PLA2G6	96	5634	20581	1.10351	1	0.957264	99.6089
UP_KEYWORDS	Transmembrane	29	26.3636	0.366454	PLXNC1, CAV1, PANX1, SGPP2, SLC5A1, STOML1, TLR2, BTN2A2, TMEM156, TSPAN9, EXTL1, ART4, EDNRA, ALCAM, ATP2B4, B3GNT5, GAB3, ITGAV, TAP1, STRA6, TGM4, GLP2R, SLCO5A1, TRABD2A, RXFP2, SLAMF8, TNFRSF10C, SSTR2, PLA2G6	96	5651	20581	1.10019	1	0.950515	99.6578
UP_SEQ_FEATURE	disulfide bond	16	14.5455	0.391075	C3, EDN2, PRSS57, RXFP2, FSTL3, TLR2, BTN2A2, SLAMF8, EXTL1, ART4, ALCAM, EDNRA, TNFRSF10C, SSTR2, ITGAV, GLP2R	95	2917	20063	1.15839	1	0.999792	99.8948
UP_KEYWORDS	Membrane	35	31.8182	0.588605	PLXNC1, CAV1, PANX1, SGPP2, SLC5A1, ASAP2, STOML1, TLR2, CYTH4, BTN2A2, TMEM156, TSPAN9, EXTL1, ART4, EDNRA, ALCAM, CHIC2, ATP2B4, B3GNT5, GAB3, ITGAV, TAP1, STRA6, TGM4, GLP2R, SLCO5A1, TRABD2A, RXFP2, SLAMF8, TNFRSF10C, SSTR2, JAK1, PLA2G6, DSP, DCUN1D3	96	7494	20581	1.00127	1	0.984041	99.9984
UP_SEQ_FEATURE	transmembrane region	24	21.8182	0.604354	PLXNC1, CAV1, PANX1, SLC5A1, TRABD2A, SGPP2, RXFP2, STOML1, TLR2, BTN2A2, TMEM156, SLAMF8, TSPAN9, EXTL1, ALCAM, EDNRA, SSTR2, ATP2B4, B3GNT5, ITGAV, TAP1, STRA6, GLP2R, SLCO5A1	95	5056	20063	1.00248	1	0.999996	99.9997
GOTERM_CC_DIRECT	GO:0016021~integral component of membrane	24	21.8182	0.735541	CAV1, PANX1, SLC5A1, SGPP2, RXFP2, STOML1, TLR2, BTN2A2, SLAMF8, TMEM156, TSPAN9, EXTL1, ART4, ALCAM, TNFRSF10C, ATP2B4, B3GNT5, GAB3, TAP1, PLA2G6, TGM4, STRA6, GLP2R, SLCO5A1	90	5163	18224	0.941262	1	0.999978	100
Annotation Cluster 11	Enrichment Score: 0.6000686696336212
Category	Term	Count	%	PValue	Genes	List Total	Pop Hits	Pop Total	Fold Enrichment	Bonferroni	Benjamini	FDR
UP_SEQ_FEATURE	nucleotide phosphate-binding region:ATP	9	8.18182	0.0942431	CIITA, IRAK3, SLK, PHKG2, CLK4, CNKSR3, TAP1, JAK1, HFM1	95	994	20063	1.91218	1	0.99046	74.5436
INTERPRO	IPR000719:Protein kinase, catalytic domain	6	5.45455	0.0978055	IRAK3, SLK, PHKG2, CLK4, JAK1, TRIB1	94	487	18559	2.43248	1	0.994414	73.7833
INTERPRO	IPR011009:Protein kinase-like domain	6	5.45455	0.12796	IRAK3, SLK, PHKG2, CLK4, JAK1, TRIB1	94	531	18559	2.23092	1	0.992767	83.1523
UP_KEYWORDS	Transferase	12	10.9091	0.163271	CIITA, ART4, IRAK3, SLK, B3GNT5, PHKG2, CLK4, JAK1, TGM4, PARP1, EXTL1, UGP2	96	1708	20581	1.50622	1	0.896666	89.1107
UP_SEQ_FEATURE	domain:Protein kinase	5	4.54545	0.186258	IRAK3, SLK, PHKG2, CLK4, TRIB1	95	478	20063	2.20909	1	0.998432	94.2096
GOTERM_BP_DIRECT	GO:0046777~protein autophosphorylation	3	2.72727	0.216421	IRAK3, SLK, CLK4	86	172	16792	3.40562	1	0.999494	97.6461
UP_KEYWORDS	Kinase	6	5.45455	0.25209	CIITA, IRAK3, SLK, PHKG2, CLK4, JAK1	96	735	20581	1.75009	1	0.928775	97.3037
UP_SEQ_FEATURE	binding site:ATP	5	4.54545	0.265702	IRAK3, SLK, PHKG2, CLK4, JAK1	95	558	20063	1.89238	1	0.999295	98.6003
UP_KEYWORDS	Serine/threonine-protein kinase	4	3.63636	0.272523	IRAK3, SLK, PHKG2, CLK4	96	393	20581	2.18204	1	0.928797	98.0897
GOTERM_MF_DIRECT	GO:0004674~protein serine/threonine kinase activity	4	3.63636	0.287942	IRAK3, SLK, PHKG2, CLK4	85	376	16881	2.11277	1	0.995525	98.6862
INTERPRO	IPR017441:Protein kinase, ATP binding site	4	3.63636	0.298423	SLK, PHKG2, CLK4, JAK1	94	381	18559	2.07282	1	0.999702	99.0049
UP_KEYWORDS	ATP-binding	9	8.18182	0.312403	CIITA, IRAK3, ATP2B4, SLK, PHKG2, CLK4, TAP1, JAK1, HFM1	96	1391	20581	1.38711	1	0.942821	99.0526
GOTERM_MF_DIRECT	GO:0005524~ATP binding	10	9.09091	0.325717	CIITA, IRAK3, ATP2B4, SLK, PHKG2, CLK4, TAP1, JAK1, TRIB1, HFM1	85	1495	16881	1.32843	1	0.995884	99.3446
UP_SEQ_FEATURE	active site:Proton acceptor	5	4.54545	0.386604	SLK, CNDP1, PHKG2, CLK4, JAK1	95	672	20063	1.57135	1	0.999842	99.8836
SMART	SM00220:S_TKc	4	3.63636	0.391735	SLK, PHKG2, CLK4, TRIB1	64	359	10057	1.75087	1	0.99844	99.4798
GOTERM_BP_DIRECT	GO:0006468~protein phosphorylation	4	3.63636	0.407454	IRAK3, PHKG2, JAK1, TRIB1	86	456	16792	1.71277	1	0.999994	99.9679
UP_KEYWORDS	Nucleotide-binding	10	9.09091	0.444355	CIITA, IRAK3, ATP2B4, SLK, NIN, PHKG2, CLK4, TAP1, JAK1, HFM1	96	1788	20581	1.19902	1	0.947848	99.9331
INTERPRO	IPR008271:Serine/threonine-protein kinase, active site	3	2.72727	0.465198	SLK, PHKG2, CLK4	94	312	18559	1.89842	1	0.999973	99.9709
Annotation Cluster 12	Enrichment Score: 0.44032741217467297
Category	Term	Count	%	PValue	Genes	List Total	Pop Hits	Pop Total	Fold Enrichment	Bonferroni	Benjamini	FDR
UP_SEQ_FEATURE	repeat:ANK 1	3	2.72727	0.317182	ABTB2, ASAP2, PLA2G6	95	244	20063	2.59659	1	0.999654	99.4875
UP_SEQ_FEATURE	repeat:ANK 2	3	2.72727	0.318905	ABTB2, ASAP2, PLA2G6	95	245	20063	2.58599	1	0.9995	99.5051
UP_KEYWORDS	ANK repeat	3	2.72727	0.344763	ABTB2, ASAP2, PLA2G6	96	264	20581	2.4362	1	0.955204	99.4799
INTERPRO	IPR002110:Ankyrin repeat	3	2.72727	0.366217	ABTB2, ASAP2, PLA2G6	94	255	18559	2.32278	1	0.999931	99.7347
INTERPRO	IPR020683:Ankyrin repeat-containing domain	3	2.72727	0.384146	ABTB2, ASAP2, PLA2G6	94	265	18559	2.23513	1	0.999838	99.8173
SMART	SM00248:ANK	3	2.72727	0.464848	ABTB2, ASAP2, PLA2G6	64	249	10057	1.89326	1	0.999057	99.8658
Annotation Cluster 13	Enrichment Score: 0.4261682536407154
Category	Term	Count	%	PValue	Genes	List Total	Pop Hits	Pop Total	Fold Enrichment	Bonferroni	Benjamini	FDR
GOTERM_MF_DIRECT	GO:0046872~metal ion binding	14	12.7273	0.225163	GLIS3, TRABD2A, ASAP2, FOXP4, ZFP36L1, PGM3, ATP2B4, ITGAV, ZNF697, JAK1, TGM4, UGP2, ZC3H12C, PLAGL2	85	2069	16881	1.34384	1	0.996616	96.1395
UP_KEYWORDS	Metal-binding	21	19.0909	0.229407	ZFAND5, GLIS3, CNDP1, TRABD2A, PDLIM4, ASAP2, RCVRN, FOXP4, ZFP36L1, PGM3, ATP2B4, ITGAV, ZNF697, JAK1, TGM4, LOX, PARP1, UGP2, TES, ZC3H12C, PLAGL2	96	3640	20581	1.23684	1	0.927172	96.09
UP_KEYWORDS	Zinc	12	10.9091	0.527049	ZFP36L1, ZFAND5, GLIS3, CNDP1, ZNF697, PDLIM4, ASAP2, PARP1, FOXP4, PLAGL2, ZC3H12C, TES	96	2348	20581	1.09567	1	0.974448	99.991
UP_KEYWORDS	Zinc-finger	8	7.27273	0.725057	ZFP36L1, ZFAND5, GLIS3, ZNF697, PARP1, FOXP4, PLAGL2, ZC3H12C	96	1781	20581	0.962989	1	0.99413	100
Annotation Cluster 14	Enrichment Score: 0.39191349910081413
Category	Term	Count	%	PValue	Genes	List Total	Pop Hits	Pop Total	Fold Enrichment	Bonferroni	Benjamini	FDR
UP_SEQ_FEATURE	repeat:LRR 4	3	2.72727	0.336073	CIITA, RXFP2, TLR2	95	255	20063	2.48458	1	0.999547	99.6522
INTERPRO	IPR001611:Leucine-rich repeat	3	2.72727	0.380577	CIITA, RXFP2, TLR2	94	263	18559	2.25212	1	0.999907	99.8031
UP_SEQ_FEATURE	repeat:LRR 3	3	2.72727	0.414721	CIITA, RXFP2, TLR2	95	302	20063	2.09791	1	0.999773	99.9391
UP_KEYWORDS	Leucine-rich repeat	3	2.72727	0.421843	CIITA, RXFP2, TLR2	96	311	20581	2.06803	1	0.953947	99.8904
UP_SEQ_FEATURE	repeat:LRR 1	3	2.72727	0.445244	CIITA, RXFP2, TLR2	95	321	20063	1.97373	1	0.999858	99.971
UP_SEQ_FEATURE	repeat:LRR 2	3	2.72727	0.446827	CIITA, RXFP2, TLR2	95	322	20063	1.9676	1	0.999809	99.9721
Annotation Cluster 15	Enrichment Score: 0.36930329617904645
Category	Term	Count	%	PValue	Genes	List Total	Pop Hits	Pop Total	Fold Enrichment	Bonferroni	Benjamini	FDR
GOTERM_BP_DIRECT	GO:0045944~positive regulation of transcription from RNA polymerase II promoter	8	7.27273	0.227785	CIITA, GLIS3, TLR2, FSTL3, FOXC2, PARP1, SOX9, PLAGL2	86	981	16792	1.5923	1	0.999567	98.1196
GOTERM_BP_DIRECT	GO:0006366~transcription from RNA polymerase II promoter	5	4.54545	0.261662	GLIS3, FOXC2, PARP1, SOX9, PLAGL2	86	513	16792	1.90308	1	0.999789	99.0565
GOTERM_BP_DIRECT	GO:0000122~negative regulation of transcription from RNA polymerase II promoter	6	5.45455	0.300364	CIITA, GLIS3, CAV1, FOXC2, PARP1, MXD1	86	720	16792	1.62713	1	0.999911	99.5876
GOTERM_MF_DIRECT	GO:0001077~transcriptional activator activity, RNA polymerase II core promoter proximal region sequence-specific binding	3	2.72727	0.328666	FOXC2, SOX9, PLAGL2	85	236	16881	2.52458	1	0.994632	99.3802
UP_KEYWORDS	Activator	5	4.54545	0.364397	CIITA, GLIS3, PNRC1, FOXC2, PLAGL2	96	661	20581	1.62167	1	0.954559	99.6438
UP_KEYWORDS	Transcription regulation	13	11.8182	0.390631	CIITA, GLIS3, FOXL1, ASCC2, ZNF697, PNRC1, FSTL3, FOXC2, PARP1, MXD1, SOX9, FOXP4, PLAGL2	96	2332	20581	1.19512	1	0.948	99.7891
UP_KEYWORDS	Transcription	13	11.8182	0.429323	CIITA, GLIS3, FOXL1, ASCC2, ZNF697, PNRC1, FSTL3, FOXC2, PARP1, MXD1, SOX9, FOXP4, PLAGL2	96	2398	20581	1.16222	1	0.953163	99.9068
GOTERM_CC_DIRECT	GO:0005634~nucleus	28	25.4545	0.488664	GLIS3, ABTB2, FSTL3, SOX9, TRIB1, ZFP36L1, IRAK3, TSC22D2, ZNF697, CLK4, SERPINA3, LOX, TES, PINX1, PLAGL2, FOXL1, ARMC12, SYNPO2, MXD1, FOXP4, PSMB8, ASCC2, PNRC1, DSP, FOXC2, JAK1, PARP1, UGP2	90	5415	18224	1.04703	1	0.999436	99.9652
UP_KEYWORDS	DNA-binding	10	9.09091	0.61356	ZFP36L1, GLIS3, FOXL1, ZNF697, FOXC2, PARP1, MXD1, SOX9, FOXP4, PLAGL2	96	2050	20581	1.04578	1	0.98675	99.9993
GOTERM_BP_DIRECT	GO:0006351~transcription, DNA-templated	8	7.27273	0.879242	CIITA, FOXL1, ASCC2, ZNF697, PNRC1, FSTL3, MXD1, FOXP4	86	1955	16792	0.799001	1	1	100
UP_KEYWORDS	Nucleus	20	18.1818	0.913888	CIITA, GLIS3, LYRM1, FOXL1, FSTL3, SYNPO2, MXD1, SOX9, FOXP4, PSMB8, ZFP36L1, DUSP5, ASCC2, ZNF697, CLK4, PNRC1, FOXC2, PARP1, PINX1, PLAGL2	96	5244	20581	0.817641	1	0.999767	100
Annotation Cluster 16	Enrichment Score: 0.20976133405111483
Category	Term	Count	%	PValue	Genes	List Total	Pop Hits	Pop Total	Fold Enrichment	Bonferroni	Benjamini	FDR
KEGG_PATHWAY	hsa04080:Neuroactive ligand-receptor interaction	4	3.63636	0.183862	EDNRA, SSTR2, RXFP2, GLP2R	38	277	6910	2.62588	1	0.874678	89.135
UP_KEYWORDS	Receptor	8	7.27273	0.645826	EDNRA, TNFRSF10C, SSTR2, ITGAV, RXFP2, TLR2, STRA6, GLP2R	96	1648	20581	1.04071	1	0.987791	99.9998
UP_KEYWORDS	G-protein coupled receptor	4	3.63636	0.751562	EDNRA, SSTR2, RXFP2, GLP2R	96	842	20581	1.01846	1	0.995105	100
UP_KEYWORDS	Transducer	4	3.63636	0.790174	EDNRA, SSTR2, RXFP2, GLP2R	96	899	20581	0.953884	1	0.99677	100
INTERPRO	IPR000276:G protein-coupled receptor, rhodopsin-like	3	2.72727	0.880217	EDNRA, SSTR2, RXFP2	94	719	18559	0.823795	1	1	100
INTERPRO	IPR017452:GPCR, rhodopsin-like, 7TM	3	2.72727	0.888273	EDNRA, SSTR2, RXFP2	94	736	18559	0.804767	1	1	100
Annotation Cluster 17	Enrichment Score: 0.16094374486229404
Category	Term	Count	%	PValue	Genes	List Total	Pop Hits	Pop Total	Fold Enrichment	Bonferroni	Benjamini	FDR
UP_KEYWORDS	DNA-binding	10	9.09091	0.61356	ZFP36L1, GLIS3, FOXL1, ZNF697, FOXC2, PARP1, MXD1, SOX9, FOXP4, PLAGL2	96	2050	20581	1.04578	1	0.98675	99.9993
UP_KEYWORDS	Zinc-finger	8	7.27273	0.725057	ZFP36L1, ZFAND5, GLIS3, ZNF697, PARP1, FOXP4, PLAGL2, ZC3H12C	96	1781	20581	0.962989	1	0.99413	100
GOTERM_MF_DIRECT	GO:0003677~DNA binding	8	7.27273	0.739503	CIITA, ZFP36L1, ZFAND5, GLIS3, FOXL1, ZNF697, SERPINA3, PARP1	85	1674	16881	0.949104	1	0.999998	100
Annotation Cluster 18	Enrichment Score: 0.15285837803182106
Category	Term	Count	%	PValue	Genes	List Total	Pop Hits	Pop Total	Fold Enrichment	Bonferroni	Benjamini	FDR
GOTERM_CC_DIRECT	GO:0005789~endoplasmic reticulum membrane	5	4.54545	0.612355	CAV1, PANX1, SGPP2, TAP1, EXTL1	90	862	18224	1.17453	1	0.999895	99.9987
UP_KEYWORDS	Endoplasmic reticulum	5	4.54545	0.732349	PANX1, SGPP2, TAP1, SERPINA1, EXTL1	96	1067	20581	1.00462	1	0.994129	100
GOTERM_CC_DIRECT	GO:0005783~endoplasmic reticulum	4	3.63636	0.775717	CAV1, PANX1, SGPP2, SERPINA1	90	828	18224	0.978207	1	0.99998	100
Annotation Cluster 19	Enrichment Score: 0.08653227852839708
Category	Term	Count	%	PValue	Genes	List Total	Pop Hits	Pop Total	Fold Enrichment	Bonferroni	Benjamini	FDR
UP_KEYWORDS	Zinc-finger	8	7.27273	0.725057	ZFP36L1, ZFAND5, GLIS3, ZNF697, PARP1, FOXP4, PLAGL2, ZC3H12C	96	1781	20581	0.962989	1	0.99413	100
UP_SEQ_FEATURE	zinc finger region:C2H2-type 5	3	2.72727	0.73312	GLIS3, ZNF697, PLAGL2	95	550	20063	1.15194	1	1	100
UP_SEQ_FEATURE	zinc finger region:C2H2-type 1	3	2.72727	0.736803	GLIS3, ZNF697, PLAGL2	95	554	20063	1.14363	1	1	100
UP_SEQ_FEATURE	zinc finger region:C2H2-type 4	3	2.72727	0.766408	GLIS3, ZNF697, PLAGL2	95	588	20063	1.0775	1	1	100
UP_SEQ_FEATURE	zinc finger region:C2H2-type 3	3	2.72727	0.803314	GLIS3, ZNF697, PLAGL2	95	636	20063	0.996177	1	1	100
INTERPRO	IPR013087:Zinc finger C2H2-type/integrase DNA-binding domain	3	2.72727	0.876749	GLIS3, ZNF697, PLAGL2	94	712	18559	0.831894	1	1	100
INTERPRO	IPR015880:Zinc finger, C2H2-like	3	2.72727	0.899637	GLIS3, ZNF697, PLAGL2	94	762	18559	0.777308	1	1	100
INTERPRO	IPR007087:Zinc finger, C2H2	3	2.72727	0.913983	GLIS3, ZNF697, PLAGL2	94	799	18559	0.741312	1	1	100
SMART	SM00355:ZnF_C2H2	3	2.72727	0.957381	GLIS3, ZNF697, PLAGL2	64	762	10057	0.618664	1	1	100
Cluster 2: TNF-induced, dex-repressed
Annotation Cluster 1	Enrichment Score: 2.2767791828721897
Category	Term	Count	%	PValue	Genes	List Total	Pop Hits	Pop Total	Fold Enrichment	Bonferroni	Benjamini	FDR
GOTERM_CC_DIRECT	GO:0005829~cytosol	23	31.5068	0.000312978	TRAF1, ADSS, ARHGEF2, ACO1, CHMP4B, CEP135, UGDH, TP63, AZIN1, RANGAP1, TRIM25, ABI1, SLC7A5, GCH1, PLK2, SMURF2, SMOX, NEDD4L, SMS, ABL2, FOSL1, MYLK, GBP2	59	3315	18224	2.14307	0.0365649	0.0365649	0.358146
GOTERM_CC_DIRECT	GO:0005737~cytoplasm	26	35.6164	0.0130202	TRAF1, ADSS, CHMP4B, TP63, RANGAP1, ABI1, AZIN1, SLC7A5, NOCT, URGCP, GCH1, SLC11A2, STK40, SMOX, ARNTL2, NEDD4L, AGRN, FGF2, ARHGEF2, ACO1, LRRC1, TRIM25, BASP1, PLK2, SMURF2, MYLK	59	5222	18224	1.5379	0.789776	0.405396	13.9479
UP_KEYWORDS	Cytoplasm	23	31.5068	0.0362686	ADSS, ARHGEF2, ACO1, CHMP4B, CEP135, BCL2A1, LRRC1, TP63, TRIM25, ABI1, RANGAP1, SLC7A5, NOCT, URGCP, GCH1, STK40, PLK2, SMURF2, SMOX, NEDD4L, ABL2, MYLK, GBP2	66	4816	20581	1.48924	0.996079	0.546894	35.6708
Annotation Cluster 2	Enrichment Score: 1.494495964256672
Category	Term	Count	%	PValue	Genes	List Total	Pop Hits	Pop Total	Fold Enrichment	Bonferroni	Benjamini	FDR
GOTERM_BP_DIRECT	GO:0098609~cell-cell adhesion	5	6.84932	0.0142377	CHMP4B, RANGAP1, ABI1, TRIM25, EHD1	59	271	16792	5.25111	0.999688	0.982344	18.9371
GOTERM_MF_DIRECT	GO:0098641~cadherin binding involved in cell-cell adhesion	5	6.84932	0.0155695	CHMP4B, RANGAP1, ABI1, TRIM25, EHD1	57	290	16881	5.10617	0.938773	0.75256	17.5456
GOTERM_CC_DIRECT	GO:0005913~cell-cell adherens junction	5	6.84932	0.0194198	CHMP4B, RANGAP1, ABI1, TRIM25, EHD1	59	323	18224	4.78145	0.903063	0.442015	20.1307
UP_KEYWORDS	Coiled coil	13	17.8082	0.244376	TRAF1, ARHGEF2, CHMP4B, CEP135, ZC3H7B, LRRC1, APOLD1, RANGAP1, TRIM25, ABI1, URGCP, EHD1, FOSL1	66	3036	20581	1.33525	1	0.877737	96.4781
Annotation Cluster 3	Enrichment Score: 1.2492880326000628
Category	Term	Count	%	PValue	Genes	List Total	Pop Hits	Pop Total	Fold Enrichment	Bonferroni	Benjamini	FDR
UP_SEQ_FEATURE	repeat:LRR 6	4	5.47945	0.0291781	LRRC1, RANGAP1, LRRC17, FBXL13	65	209	20063	5.9074	0.999609	0.980231	32.1734
UP_SEQ_FEATURE	repeat:LRR 5	4	5.47945	0.0375685	LRRC1, RANGAP1, LRRC17, FBXL13	65	231	20063	5.34479	0.999961	0.966037	39.4689
UP_SEQ_FEATURE	repeat:LRR 4	4	5.47945	0.0479798	LRRC1, RANGAP1, LRRC17, FBXL13	65	255	20063	4.84175	0.999998	0.961514	47.5131
INTERPRO	IPR001611:Leucine-rich repeat	4	5.47945	0.0512075	LRRC1, RANGAP1, LRRC17, FBXL13	60	263	18559	4.70444	0.999943	0.999943	47.8483
UP_SEQ_FEATURE	repeat:LRR 3	4	5.47945	0.0719923	LRRC1, RANGAP1, LRRC17, FBXL13	65	302	20063	4.08823	1	0.940899	62.4507
UP_KEYWORDS	Leucine-rich repeat	4	5.47945	0.0753583	LRRC1, RANGAP1, LRRC17, FBXL13	66	311	20581	4.01072	0.999992	0.691254	60.7656
UP_SEQ_FEATURE	repeat:LRR 1	4	5.47945	0.0829747	LRRC1, RANGAP1, LRRC17, FBXL13	65	321	20063	3.84625	1	0.943261	67.8768
UP_SEQ_FEATURE	repeat:LRR 2	4	5.47945	0.0835719	LRRC1, RANGAP1, LRRC17, FBXL13	65	322	20063	3.8343	1	0.923439	68.1499
Annotation Cluster 4	Enrichment Score: 1.1895130720763745
Category	Term	Count	%	PValue	Genes	List Total	Pop Hits	Pop Total	Fold Enrichment	Bonferroni	Benjamini	FDR
UP_KEYWORDS	Differentiation	8	10.9589	0.00497172	EREG, APOLD1, NEDD4L, AGRN, SLC7A5, TNFAIP2, FGF2, ADGRG1	66	667	20581	3.74013	0.526507	0.311892	5.77821
UP_KEYWORDS	Angiogenesis	4	5.47945	0.0074244	EREG, APOLD1, TNFAIP2, FGF2	66	126	20581	9.89947	0.673007	0.311063	8.51457
UP_KEYWORDS	Developmental protein	8	10.9589	0.0296336	EREG, APOLD1, TP63, AGRN, SLC7A5, TNFAIP2, FGF2, ADGRG1	66	949	20581	2.62873	0.989026	0.528595	30.1781
GOTERM_BP_DIRECT	GO:0001525~angiogenesis	4	5.47945	0.0418179	EREG, APOLD1, TNFAIP2, ADGRG1	59	223	16792	5.10512	1	0.981836	46.4956
GOTERM_BP_DIRECT	GO:0043547~positive regulation of GTPase activity	5	6.84932	0.130708	ARHGEF2, EREG, RANGAP1, AGRN, FGF2	59	565	16792	2.51867	1	0.998601	87.1366
UP_KEYWORDS	Secreted	5	6.84932	0.879261	EREG, LRRC17, AGRN, FGF2, ADGRG1	66	1965	20581	0.793469	1	0.998649	100
GOTERM_CC_DIRECT	GO:0005576~extracellular region	4	5.47945	0.896758	EREG, APOLD1, AGRN, FGF2	59	1610	18224	0.767407	1	0.99998	100
Annotation Cluster 5	Enrichment Score: 1.0454998242247115
Category	Term	Count	%	PValue	Genes	List Total	Pop Hits	Pop Total	Fold Enrichment	Bonferroni	Benjamini	FDR
GOTERM_MF_DIRECT	GO:0005525~GTP binding	6	8.21918	0.00876559	ADSS, EHD1, ARL5B, GBP2, URGCP, GCH1	57	384	16881	4.62747	0.791362	0.791362	10.2591
UP_KEYWORDS	GTP-binding	4	5.47945	0.0944061	ADSS, ARL5B, GBP2, GCH1	66	343	20581	3.63654	1	0.74134	69.4005
UP_SEQ_FEATURE	nucleotide phosphate-binding region:GTP	3	4.10959	0.260097	ADSS, ARL5B, GBP2	65	310	20063	2.98705	1	0.995116	98.073
INTERPRO	IPR027417:P-loop containing nucleoside triphosphate hydrolase	5	6.84932	0.305552	ADSS, EHD1, ARL5B, GBP2, URGCP	60	879	18559	1.75948	1	0.999988	98.9067
Annotation Cluster 6	Enrichment Score: 1.019306045884321
Category	Term	Count	%	PValue	Genes	List Total	Pop Hits	Pop Total	Fold Enrichment	Bonferroni	Benjamini	FDR
UP_SEQ_FEATURE	nucleotide phosphate-binding region:NAD	3	4.10959	0.0269882	ALDH1B1, UGDH, UXS1	65	80	20063	11.5748	0.99929	0.99929	30.14
UP_KEYWORDS	NAD	3	4.10959	0.105742	ALDH1B1, UGDH, UXS1	66	175	20581	5.34571	1	0.724605	73.6739
KEGG_PATHWAY	hsa01100:Metabolic pathways	8	10.9589	0.306662	ADSS, ALDH1B1, ACO1, UGDH, SMS, DSE, UXS1, GCH1	32	1228	6910	1.40676	1	0.989078	97.8362
Annotation Cluster 7	Enrichment Score: 0.9079201472865794
Category	Term	Count	%	PValue	Genes	List Total	Pop Hits	Pop Total	Fold Enrichment	Bonferroni	Benjamini	FDR
UP_SEQ_FEATURE	lipid moiety-binding region:N-myristoyl glycine	3	4.10959	0.0529748	BASP1, ABL2, ARL5B	65	116	20063	7.98263	0.999999	0.944132	51.0108
UP_KEYWORDS	Myristate	3	4.10959	0.126329	BASP1, ABL2, ARL5B	66	195	20581	4.79744	1	0.718073	80.0659
UP_KEYWORDS	Lipoprotein	5	6.84932	0.282271	APOLD1, BASP1, ABL2, ARL5B, GBP2	66	852	20581	1.83001	1	0.885023	98.0949
Annotation Cluster 8	Enrichment Score: 0.7109163028797478
Category	Term	Count	%	PValue	Genes	List Total	Pop Hits	Pop Total	Fold Enrichment	Bonferroni	Benjamini	FDR
GOTERM_BP_DIRECT	GO:0042787~protein ubiquitination involved in ubiquitin-dependent protein catabolic process	3	4.10959	0.098019	TRIM25, SMURF2, NEDD4L	59	153	16792	5.58059	1	0.999297	77.9166
UP_KEYWORDS	Ubl conjugation pathway	5	6.84932	0.167371	FBXL13, TRIM25, SMURF2, NEDD4L, USP43	66	680	20581	2.29289	1	0.764503	88.7783
UP_KEYWORDS	Transferase	8	10.9589	0.292992	STK40, PLK2, TRIM25, SMURF2, NEDD4L, SMS, ABL2, MYLK	66	1708	20581	1.46058	1	0.875105	98.4083
GOTERM_MF_DIRECT	GO:0004842~ubiquitin-protein transferase activity	3	4.10959	0.298187	TRIM25, SMURF2, NEDD4L	57	329	16881	2.70053	1	0.999621	98.7136
Annotation Cluster 9	Enrichment Score: 0.6367340133238555
Category	Term	Count	%	PValue	Genes	List Total	Pop Hits	Pop Total	Fold Enrichment	Bonferroni	Benjamini	FDR
UP_KEYWORDS	Nucleotide-binding	11	15.0685	0.0529329	ADSS, STK40, PLK2, GTF2F2, ATP13A3, EHD1, ABL2, ARL5B, MYLK, GBP2, GCH1	66	1788	20581	1.91844	0.999714	0.596033	47.7668
UP_SEQ_FEATURE	binding site:ATP	5	6.84932	0.102449	STK40, PLK2, EHD1, ABL2, MYLK	65	558	20063	2.76578	1	0.926014	75.756
UP_KEYWORDS	Cytoskeleton	7	9.58904	0.149162	ARHGEF2, PLK2, CEP135, RANGAP1, ABI1, ABL2, MYLK	66	1138	20581	1.91813	1	0.759563	85.4704
UP_SEQ_FEATURE	active site:Proton acceptor	5	6.84932	0.166555	STK40, PLK2, ALDH1B1, ABL2, MYLK	65	672	20063	2.29659	1	0.982107	90.8231
UP_SEQ_FEATURE	domain:Protein kinase	4	5.47945	0.195725	STK40, PLK2, ABL2, MYLK	65	478	20063	2.58294	1	0.988205	94.2475
INTERPRO	IPR000719:Protein kinase, catalytic domain	4	5.47945	0.201589	STK40, PLK2, ABL2, MYLK	60	487	18559	2.54059	1	0.999999	93.8471
UP_SEQ_FEATURE	nucleotide phosphate-binding region:ATP	6	8.21918	0.210143	STK40, PLK2, GTF2F2, EHD1, ABL2, MYLK	65	994	20063	1.86315	1	0.988499	95.4621
INTERPRO	IPR011009:Protein kinase-like domain	4	5.47945	0.238264	STK40, PLK2, ABL2, MYLK	60	531	18559	2.33007	1	0.999997	96.5632
INTERPRO	IPR008271:Serine/threonine-protein kinase, active site	3	4.10959	0.261199	STK40, PLK2, MYLK	60	312	18559	2.9742	1	0.999987	97.6464
UP_KEYWORDS	ATP-binding	7	9.58904	0.275026	STK40, PLK2, GTF2F2, ATP13A3, EHD1, ABL2, MYLK	66	1391	20581	1.56925	1	0.888403	97.8521
UP_KEYWORDS	Transferase	8	10.9589	0.292992	STK40, PLK2, TRIM25, SMURF2, NEDD4L, SMS, ABL2, MYLK	66	1708	20581	1.46058	1	0.875105	98.4083
SMART	SM00220:S_TKc	3	4.10959	0.304103	STK40, PLK2, MYLK	32	359	10057	2.62631	1	1	96.9074
INTERPRO	IPR017441:Protein kinase, ATP binding site	3	4.10959	0.342318	PLK2, ABL2, MYLK	60	381	18559	2.43556	1	0.999985	99.4426
UP_KEYWORDS	Serine/threonine-protein kinase	3	4.10959	0.353164	STK40, PLK2, MYLK	66	393	20581	2.38041	1	0.911109	99.4497
GOTERM_MF_DIRECT	GO:0005524~ATP binding	7	9.58904	0.376415	STK40, PLK2, GTF2F2, ATP13A3, EHD1, ABL2, MYLK	57	1495	16881	1.38669	1	0.999777	99.6992
UP_KEYWORDS	Kinase	4	5.47945	0.41126	STK40, PLK2, ABL2, MYLK	66	735	20581	1.69705	1	0.941461	99.8211
GOTERM_BP_DIRECT	GO:0006468~protein phosphorylation	3	4.10959	0.469861	STK40, PLK2, MYLK	59	456	16792	1.87244	1	0.999999	99.9908
Annotation Cluster 10	Enrichment Score: 0.5258332863949773
Category	Term	Count	%	PValue	Genes	List Total	Pop Hits	Pop Total	Fold Enrichment	Bonferroni	Benjamini	FDR
GOTERM_BP_DIRECT	GO:0006366~transcription from RNA polymerase II promoter	6	8.21918	0.0317519	ELF4, GTF2F2, TP63, FOSL1, MSC, NOCT	59	513	16792	3.32877	1	0.989343	37.6499
UP_SEQ_FEATURE	DNA-binding region:Basic motif	3	4.10959	0.095466	ARNTL2, FOSL1, MSC	65	163	20063	5.68089	1	0.929974	73.1632
GOTERM_BP_DIRECT	GO:0045944~positive regulation of transcription from RNA polymerase II promoter	7	9.58904	0.121449	ARHGEF2, ELF4, TP63, ARNTL2, AGRN, FGF2, FOSL1	59	981	16792	2.03086	1	0.999318	84.9785
GOTERM_MF_DIRECT	GO:0001077~transcriptional activator activity, RNA polymerase II core promoter proximal region sequence-specific binding	3	4.10959	0.184377	ELF4, TP63, FOSL1	57	236	16881	3.76472	1	0.997633	91.8378
GOTERM_MF_DIRECT	GO:0003700~transcription factor activity, sequence-specific DNA binding	6	8.21918	0.212642	TP63, TRIM25, ARNTL2, FOSL1, MSC, NOCT	57	961	16881	1.84906	1	0.99771	94.7096
GOTERM_BP_DIRECT	GO:0045893~positive regulation of transcription, DNA-templated	4	5.47945	0.262645	ELF4, TP63, ARNTL2, FGF2	59	515	16792	2.21056	1	0.999812	98.8447
UP_KEYWORDS	Activator	3	4.10959	0.62222	ELF4, TP63, ARNTL2	66	661	20581	1.41528	1	0.978561	99.9991
UP_KEYWORDS	DNA-binding	6	8.21918	0.788446	ELF4, GTF2F2, TP63, ARNTL2, FOSL1, MSC	66	2050	20581	0.912683	1	0.995566	100
UP_KEYWORDS	Transcription regulation	5	6.84932	0.946104	ELF4, GTF2F2, TP63, ARNTL2, MSC	66	2332	20581	0.668596	1	0.999814	100
UP_KEYWORDS	Transcription	5	6.84932	0.953778	ELF4, GTF2F2, TP63, ARNTL2, MSC	66	2398	20581	0.650195	1	0.999834	100
GOTERM_MF_DIRECT	GO:0003677~DNA binding	3	4.10959	0.979474	GTF2F2, TP63, FOSL1	57	1674	16881	0.530749	1	1	100
Annotation Cluster 11	Enrichment Score: 0.18148159067240496
Category	Term	Count	%	PValue	Genes	List Total	Pop Hits	Pop Total	Fold Enrichment	Bonferroni	Benjamini	FDR
INTERPRO	IPR013032:EGF-like, conserved site	3	4.10959	0.131883	EREG, ITGB8, AGRN	60	199	18559	4.66307	1	0.999998	82.6502
GOTERM_BP_DIRECT	GO:0007267~cell-cell signaling	3	4.10959	0.218792	EREG, CD70, ADGRG1	59	254	16792	3.36154	1	0.999557	97.3082
GOTERM_CC_DIRECT	GO:0005887~integral component of plasma membrane	7	9.58904	0.293887	SLC11A2, TNFRSF9, EREG, CD70, ATP13A3, SLC7A5, ADGRG1	59	1415	18224	1.52803	1	0.958636	98.1473
UP_KEYWORDS	Membrane	25	34.2466	0.51261	ARHGEF2, FIBP, CHMP4B, TMEM217, LRRC1, TMEM237, APOLD1, CD70, RANGAP1, ABI1, BASP1, ATP13A3, DSE, SLC7A5, UXS1, ADGRG1, SLC11A2, TNFRSF9, EREG, LAYN, ITGB8, SMURF2, AGRN, EHD1, GBP2	66	7494	20581	1.04028	1	0.965571	99.9813
GOTERM_CC_DIRECT	GO:0009986~cell surface	3	4.10959	0.518182	SLC11A2, ITGB8, LAYN	59	542	18224	1.70968	1	0.989676	99.9768
UP_KEYWORDS	Transmembrane helix	16	21.9178	0.819761	TMEM217, TMEM237, APOLD1, CD70, ATP13A3, UXS1, ADGRG1, SLC7A5, DSE, SLC11A2, TNFRSF9, EREG, LAYN, ITGB8, SMURF2, AGRN	66	5634	20581	0.885576	1	0.997095	100
UP_SEQ_FEATURE	glycosylation site:N-linked (GlcNAc...)	12	16.4384	0.820819	SLC11A2, TNFRSF9, EREG, ITGB8, LAYN, TMEM217, CD70, AGRN, SLC7A5, ADGRG1, DSE, UXS1	65	4234	20063	0.874808	1	1	100
UP_KEYWORDS	Transmembrane	16	21.9178	0.823598	TMEM217, TMEM237, APOLD1, CD70, ATP13A3, UXS1, ADGRG1, SLC7A5, DSE, SLC11A2, TNFRSF9, EREG, LAYN, ITGB8, SMURF2, AGRN	66	5651	20581	0.882912	1	0.996921	100
UP_SEQ_FEATURE	transmembrane region	14	19.1781	0.853057	TMEM217, APOLD1, TMEM237, CD70, ATP13A3, UXS1, ADGRG1, SLC7A5, DSE, SLC11A2, TNFRSF9, EREG, LAYN, ITGB8	65	5056	20063	0.85468	1	1	100
GOTERM_CC_DIRECT	GO:0016021~integral component of membrane	14	19.1781	0.876144	TMEM217, APOLD1, TMEM237, CD70, ATP13A3, SLC7A5, UXS1, DSE, ADGRG1, SLC11A2, TNFRSF9, LAYN, SMURF2, AGRN	59	5163	18224	0.837563	1	0.999968	100
UP_KEYWORDS	Glycoprotein	12	16.4384	0.879345	SLC11A2, TNFRSF9, EREG, ITGB8, LAYN, TMEM217, CD70, AGRN, SLC7A5, ADGRG1, DSE, UXS1	66	4551	20581	0.822237	1	0.998457	100
UP_SEQ_FEATURE	topological domain:Extracellular	7	9.58904	0.895724	SLC11A2, TNFRSF9, EREG, ITGB8, LAYN, CD70, ADGRG1	65	2787	20063	0.775253	1	1	100
UP_SEQ_FEATURE	signal peptide	8	10.9589	0.926318	TNFRSF9, EREG, ITGB8, LAYN, LRRC17, AGRN, ADGRG1, DSE	65	3346	20063	0.737983	1	1	100
UP_KEYWORDS	Disulfide bond	8	10.9589	0.933332	TNFRSF9, EREG, ITGB8, LAYN, CD70, AGRN, SLC7A5, MYLK	66	3434	20581	0.726461	1	0.999704	100
UP_SEQ_FEATURE	topological domain:Cytoplasmic	8	10.9589	0.940572	SLC11A2, TNFRSF9, EREG, ITGB8, LAYN, CD70, ADGRG1, UXS1	65	3456	20063	0.714494	1	1	100
UP_SEQ_FEATURE	disulfide bond	6	8.21918	0.965508	TNFRSF9, EREG, ITGB8, LAYN, CD70, AGRN	65	2917	20063	0.634888	1	1	100
UP_KEYWORDS	Signal	9	12.3288	0.966114	TNFRSF9, EREG, ITGB8, LAYN, TMEM217, LRRC17, AGRN, ADGRG1, DSE	66	4160	20581	0.674639	1	0.999902	100
UP_KEYWORDS	Receptor	3	4.10959	0.970846	TNFRSF9, ITGB8, ADGRG1	66	1648	20581	0.567658	1	0.999923	100
Cluster 3: dex-induced, TNF-repressed
Annotation Cluster 1	Enrichment Score: 0.4329359193080663
Category	Term	Count	%	PValue	Genes	List Total	Pop Hits	Pop Total	Fold Enrichment	Bonferroni	Benjamini	FDR
UP_KEYWORDS	Developmental protein	4	15.3846	0.0700566	DACT1, PGF, FHL1, HIF3A	22	949	20581	3.9431	0.998916	0.96708	54.9213
UP_KEYWORDS	Cytoplasm	8	30.7692	0.202251	DACT1, MLPH, USP2, FHL1, HIF3A, GAS2L1, SSX2IP, KLHL4	22	4816	20581	1.55399	1	0.951894	91.6154
UP_KEYWORDS	Nucleus	6	23.0769	0.651547	DACT1, USP2, FHL1, RASL10A, HIF3A, SSX2IP	22	5244	20581	1.07037	1	0.995936	99.9991
GOTERM_CC_DIRECT	GO:0005829~cytosol	4	15.3846	0.763341	DACT1, GCLC, FHL1, HIF3A	22	3315	18224	0.999534	1	0.999971	99.9999
GOTERM_CC_DIRECT	GO:0005634~nucleus	4	15.3846	0.971216	DACT1, FHL1, HIF3A, SSX2IP	22	5415	18224	0.611903	1	1	100
Annotation Cluster 2	Enrichment Score: 0.42405396326864564
Category	Term	Count	%	PValue	Genes	List Total	Pop Hits	Pop Total	Fold Enrichment	Bonferroni	Benjamini	FDR
KEGG_PATHWAY	hsa01100:Metabolic pathways	4	15.3846	0.0733484	ACSL1, GCLC, GCNT1, PYGB	7	1228	6910	3.21545	0.812862	0.812862	44.9095
UP_KEYWORDS	Nucleotide-binding	5	19.2308	0.103564	ACSL1, GCLC, RASL10A, PDK4, ATP13A2	22	1788	20581	2.61605	0.999966	0.967471	69.8602
UP_KEYWORDS	ATP-binding	4	15.3846	0.165939	ACSL1, GCLC, PDK4, ATP13A2	22	1391	20581	2.69015	1	0.941731	86.3369
GOTERM_MF_DIRECT	GO:0005524~ATP binding	4	15.3846	0.283395	ACSL1, GCLC, PDK4, ATP13A2	22	1495	16881	2.05303	1	1	96.7213
UP_KEYWORDS	Membrane	8	30.7692	0.692516	SLC16A14, ACSL1, GCLC, ARHGEF39, RASL10A, ATP13A2, GCNT1, FLVCR2	22	7494	20581	0.998666	1	0.997075	99.9998
UP_KEYWORDS	Transmembrane helix	6	23.0769	0.720831	SLC16A14, ACSL1, GCLC, ATP13A2, GCNT1, FLVCR2	22	5634	20581	0.996273	1	0.996692	99.9999
UP_KEYWORDS	Transmembrane	6	23.0769	0.723649	SLC16A14, ACSL1, GCLC, ATP13A2, GCNT1, FLVCR2	22	5651	20581	0.993276	1	0.995893	99.9999
UP_SEQ_FEATURE	topological domain:Cytoplasmic	4	15.3846	0.727172	SLC16A14, ACSL1, ATP13A2, GCNT1	22	3456	20063	1.0555	1	1	99.9999
GOTERM_CC_DIRECT	GO:0016021~integral component of membrane	6	23.0769	0.752398	SLC16A14, ACSL1, GCLC, ATP13A2, GCNT1, FLVCR2	22	5163	18224	0.962654	1	0.999999	99.9999
UP_SEQ_FEATURE	transmembrane region	5	19.2308	0.814039	SLC16A14, ACSL1, ATP13A2, GCNT1, FLVCR2	22	5056	20063	0.901854	1	1	100
Annotation Cluster 3	Enrichment Score: 0.3035039149216785
Category	Term	Count	%	PValue	Genes	List Total	Pop Hits	Pop Total	Fold Enrichment	Bonferroni	Benjamini	FDR
UP_KEYWORDS	Zinc	4	15.3846	0.435408	MLPH, USP2, AGFG2, FHL1	22	2348	20581	1.5937	1	0.988643	99.811
GOTERM_MF_DIRECT	GO:0046872~metal ion binding	4	15.3846	0.484509	MLPH, USP2, AGFG2, ATP13A2	22	2069	16881	1.48346	1	1	99.8882
UP_KEYWORDS	Metal-binding	5	19.2308	0.523368	MLPH, USP2, AGFG2, FHL1, ATP13A2	22	3640	20581	1.28503	1	0.993094	99.9705
UP_KEYWORDS	Zinc-finger	3	11.5385	0.553324	MLPH, AGFG2, FHL1	22	1781	20581	1.5758	1	0.991216	99.9855
Annotation Cluster 4	Enrichment Score: 0.206901746910235
Category	Term	Count	%	PValue	Genes	List Total	Pop Hits	Pop Total	Fold Enrichment	Bonferroni	Benjamini	FDR
GOTERM_CC_DIRECT	GO:0005886~plasma membrane	6	23.0769	0.532182	SLC16A14, ACSL1, ARHGEF39, FHL1, RASL10A, FLVCR2	22	4121	18224	1.20606	1	0.999984	99.9478
UP_KEYWORDS	Cell membrane	4	15.3846	0.649838	SLC16A14, ARHGEF39, RASL10A, FLVCR2	22	3175	20581	1.17858	1	0.99698	99.999
UP_KEYWORDS	Membrane	8	30.7692	0.692516	SLC16A14, ACSL1, GCLC, ARHGEF39, RASL10A, ATP13A2, GCNT1, FLVCR2	22	7494	20581	0.998666	1	0.997075	99.9998
Annotation Cluster 5	Enrichment Score: 0.13780318673351588
Category	Term	Count	%	PValue	Genes	List Total	Pop Hits	Pop Total	Fold Enrichment	Bonferroni	Benjamini	FDR
GOTERM_CC_DIRECT	GO:0005615~extracellular space	3	11.5385	0.466539	PGF, CTSD, GCNT1	22	1347	18224	1.84491	1	0.999995	99.8073
GOTERM_CC_DIRECT	GO:0005576~extracellular region	3	11.5385	0.56502	PGF, VSTM2L, CTSD	22	1610	18224	1.54353	1	0.999936	99.9747
UP_SEQ_FEATURE	disulfide bond	4	15.3846	0.607028	PGF, VSTM2L, CTSD, GCNT1	22	2917	20063	1.25054	1	1	99.9961
UP_KEYWORDS	Disulfide bond	4	15.3846	0.70529	PGF, VSTM2L, CTSD, GCNT1	22	3434	20581	1.08969	1	0.996793	99.9998
UP_KEYWORDS	Glycoprotein	4	15.3846	0.874526	ACSL1, PGF, CTSD, GCNT1	22	4551	20581	0.822237	1	0.999705	100
UP_SEQ_FEATURE	signal peptide	3	11.5385	0.887333	PGF, VSTM2L, CTSD	22	3346	20063	0.817652	1	1	100
UP_KEYWORDS	Signal	3	11.5385	0.944965	PGF, VSTM2L, CTSD	22	4160	20581	0.674639	1	0.999982	100
UP_SEQ_FEATURE	glycosylation site:N-linked (GlcNAc...)	3	11.5385	0.954488	PGF, CTSD, GCNT1	22	4234	20063	0.646165	1	1	100
